# Supplementary material for: Visible-light-initiated metal-free Csp3–Csp3 to Csp3–N conversion in homobenzylic sulfonamides with N-iodoimides
Source: Royal Society of Chemistry journal article supplement (doi:10.1039/d5sc02168e), 2025-01-01
Supplement: d5sc02168e1.pdf [file d5sc02168e1.pdf]

## Supplementary Information

for

### Visible-light-initiated metal-free $C_{sp^3}-C_{sp^3}$ to $C_{sp^3}-N$ conversion in homobenzylic sulfonamides with *N*-iodoimides

**Guillermo Morales-Ortega, Estíbaliz Merino, Javier Carreras**

*Departamento de Química Orgánica y Química Inorgánica, Instituto de Investigación Química “Andrés M. del Río” (IQAR), Universidad de Alcalá, 28805, Alcalá de Henares, Madrid, Spain  
Instituto Ramón y Cajal de Investigación Sanitaria (IRYCIS) 28034, Madrid, Spain.*

*E-mail: [javier.carreras@uah.es](mailto:javier.carreras@uah.es)*

## Table of Contents

|                                               |      |
|-----------------------------------------------|------|
| 1. General information .....                  | S2   |
| 2. Optimization studies .....                 | S3   |
| 3. General procedure .....                    | S6   |
| 4. Characterization data .....                | S7   |
| 4.1. Substrates .....                         | S7   |
| 4.2. <i>gem</i> -diamines .....               | S29  |
| 4.3. Derivatization products .....            | S39  |
| 5. Mechanistic experiments .....              | S41  |
| 6. DFT studies .....                          | S44  |
| 7. NMR Spectra .....                          | S50  |
| 8. X-ray diffraction data of <b>2aa</b> ..... | S122 |

## 1. General information

All commercially available compounds were used as received. Reactions were carried out under nitrogen atmosphere with standard schlenck techniques. Solvents were purchased from commercial sources. Analytical thin layer chromatography was carried out using TLC-aluminium sheets with 0.2 mm of silica gel (Merck 60 F254) and UV light as visualizing agent or phosphomolybdic acid solution as developing agent. Chromatography purifications were carried out using silica gel (40-63  $\mu\text{m}$ , 60  $\text{\AA}$ ). The irradiations were carried out with Kessil LED light A160WE Tuna Blue in a EvoluChem PhotoRedOx Box™ photoreactor.

NMR spectra were recorded at 298 K using either a Varian Mercury VX-300, Bruker Avance NEO 400, or Varian Unity 500 MHz spectrometer. Chemical shift values for  $^1\text{H}$  and  $^{13}\text{C}$  are reported as  $\delta$  values (ppm) relative to the deuterated solvent ( $\text{CDCl}_3$ : 7.26 ppm, 77.16 ppm,  $\text{CD}_3\text{OD}$ : 3.31 ppm, 49.0 ppm,  $\text{CD}_3\text{COCD}_3$ : 2.05 ppm, 29.8 ppm) and coupling constants ( $J$ ) in Hz. The following abbreviations are used in reporting NMR data: s, singlet; bs, broad singlet; d, doublet; t, triplet; q, quartet; quin, quintuplet; m, multiplet. Optical rotations were obtained using a PerkinElmer 341 polarimeter and concentrations are given in g/100mL. Melting points were determined in open capillary tubes using a Stuart Scientific SMP3 melting point apparatus. High-resolution analysis (HRMS) were performed using an Agilent 6210 TOF LC/MS system by Centro de Instrumentación Científico-Técnica (CICT)- Servicios Centrales de Apoyo a la Investigación (SCAI)- Universidad de Jaén (UJA, MICINN, Junta de Andalucía, FEDER). Single crystal structure determination was performed using a Bruker D8 VENTURE Photon III area-detector diffractometer with CuK $\alpha$  radiation.

## 2. Optimization studies

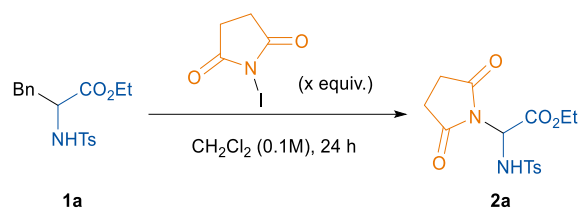

**Table S1.** Optimization of the reaction conditions under LED strips irradiation.

|          | LED strips (~30 W)           | NIS (equiv)           | Conversion <sup>a</sup> (%) |
|----------|------------------------------|-----------------------|-----------------------------|
| <b>1</b> | Violet LED                   | 1,2                   | 27                          |
| <b>2</b> | Blue LED                     | 1,2                   | 32                          |
| <b>3</b> | White LED                    | 1,2                   | 20                          |
| <b>4</b> | Bright blue LED <sup>b</sup> | 1,2                   | 64                          |
| <b>5</b> | Bright blue LED <sup>b</sup> | 1,5                   | 84                          |
| <b>6</b> | Bright blue LED <sup>b</sup> | 0,75 x 2 <sup>c</sup> | 74                          |
| <b>7</b> | Bright blue LED <sup>b</sup> | 2                     | 100                         |

<sup>a</sup> Conversion measured by <sup>1</sup>H NMR, <sup>b</sup> Reaction temperature ~47 °C, <sup>c</sup> Second addition after 8 hours.

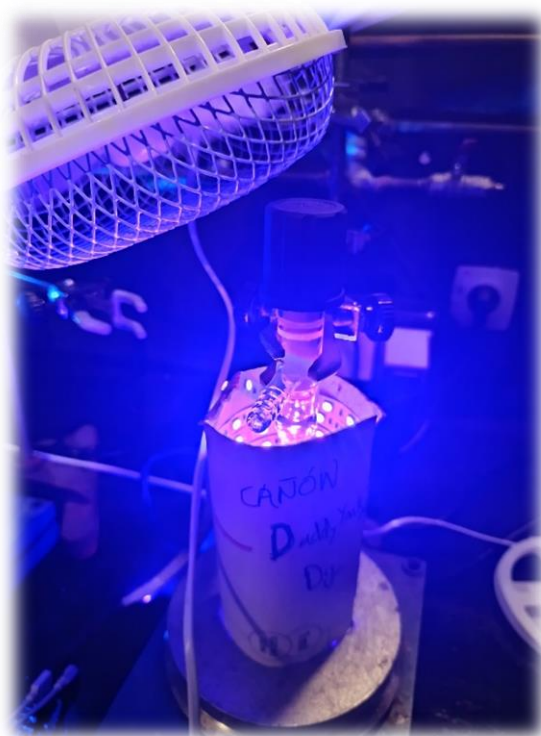

**Figure S1.** Reaction setup with LED strips. The reaction was exposed to LED strips positioned at 4 cm from the Schlenk tube. A fan was placed on top of the Schlenk tube to maintain the temperature constant.

**Table S2.** Optimization of the reaction conditions under Kessil LED irradiation.

|           | Kessil LED                           | Distance (cm) | NIS (equiv)          | Conversion <sup>a</sup> (%) |
|-----------|--------------------------------------|---------------|----------------------|-----------------------------|
| <b>1</b>  | 370 nm (40 W) <sup>b</sup>           | 2             | 1,2                  | -                           |
| <b>2</b>  | 395 nm (40 W) <sup>b</sup>           | 2             | 1,2                  | -                           |
| <b>3</b>  | 405 nm (40 W) <sup>b</sup>           | 2             | 1,2                  | -                           |
| <b>4</b>  | 405 nm (40 W) <sup>b</sup>           | 5             | 1,2                  | -                           |
| <b>5</b>  | 440 nm (2x40 W) <sup>c</sup>         | 4             | 1,2                  | 19                          |
| <b>6</b>  | 440 nm (2x40 W) <sup>c</sup>         | 2             | 1,2                  | 25                          |
| <b>7</b>  | 525 nm (2x40 W) <sup>b</sup>         | 2             | 1,2                  | 64                          |
| <b>8</b>  | White Kessil (2x40 W) <sup>c,d</sup> | 2             | 1,2                  | 61                          |
| <b>9</b>  | White Kessil (2x40 W) <sup>c,d</sup> | 4             | 1,2                  | 11                          |
| <b>10</b> | White Kessil (2x40 W) <sup>c,d</sup> | 2             | 0,6 x 2 <sup>e</sup> | 56                          |
| <b>11</b> | White Kessil (2x40 W) <sup>c,d</sup> | 2             | 1,2 x 2 <sup>e</sup> | 99                          |
| <b>12</b> | White Kessil (40 W) <sup>c</sup>     | 2             | 1,2                  | 60                          |

<sup>a</sup> Conversion measured by <sup>1</sup>H NMR, <sup>b</sup> Kessil LED PR160L, <sup>c</sup> Kessil LED A160WE Tuna Blue, <sup>d</sup> Reaction temperature ~65 °C, <sup>e</sup> Second addition after 8 hours.

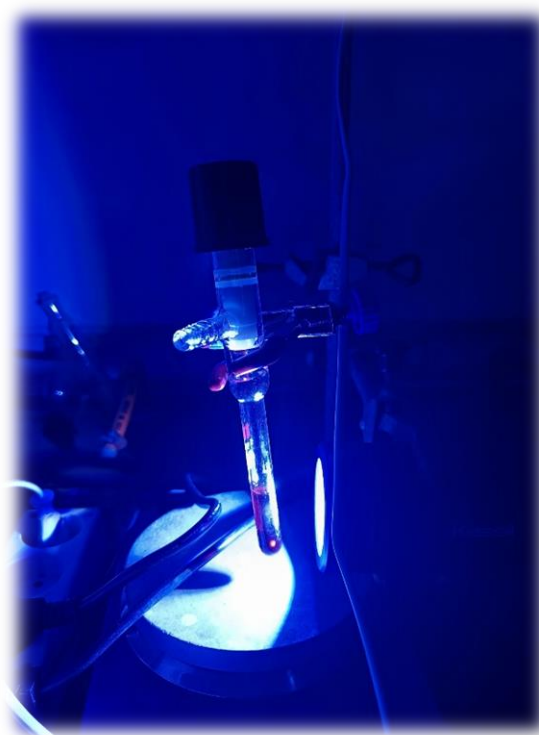

**Figure S2.** Reaction setup with Kessil LED. The reaction was exposed to Kessil LED lamp positioned at 2-5 cm from the Schlenk tube. A fan was placed on top of the Schlenk tube to maintain the temperature at 30 °C.



**Table S3.** Optimization of the reaction conditions under Kessil LED irradiation in EvoluChem PhotoRedOx Box™ photoreactor.

|           | Kessil LED 40 W (photoreactor) | Solvent                         | Conc.   | NIS (equiv)           | Conversion <sup>a</sup> (%) |
|-----------|--------------------------------|---------------------------------|---------|-----------------------|-----------------------------|
| <b>1</b>  | 395 nm <sup>b</sup>            | CH <sub>2</sub> Cl <sub>2</sub> | 0.1 M   | 1,2                   | 10                          |
| <b>2</b>  | 405 nm <sup>b</sup>            | CH <sub>2</sub> Cl <sub>2</sub> | 0.1 M   | 1,2                   | 32                          |
| <b>3</b>  | 440 nm <sup>b</sup>            | CH <sub>2</sub> Cl <sub>2</sub> | 0.1 M   | 2                     | 78                          |
| <b>4</b>  | 525 nm <sup>b</sup>            | CH <sub>2</sub> Cl <sub>2</sub> | 0.1 M   | 2                     | 84                          |
| <b>5</b>  | White Kessil <sup>c,d</sup>    | CH <sub>2</sub> Cl <sub>2</sub> | 0.1 M   | 1,2                   | 86                          |
| <b>6</b>  | White Kessil <sup>c,d</sup>    | CH <sub>2</sub> Cl <sub>2</sub> | 0.1 M   | 1,5                   | 78                          |
| <b>7</b>  | White Kessil <sup>c,d</sup>    | CH <sub>2</sub> Cl <sub>2</sub> | 0.1 M   | 0,75 x 2 <sup>e</sup> | 74                          |
| <b>8</b>  | White Kessil <sup>c,d</sup>    | CH <sub>2</sub> Cl <sub>2</sub> | 0.1 M   | 2                     | 100 (96) <sup>f</sup>       |
| <b>9</b>  | White Kessil <sup>c,d</sup>    | CH <sub>2</sub> Cl <sub>2</sub> | 0.05 M  | 2                     | 85                          |
| <b>10</b> | White Kessil <sup>c,d</sup>    | CH <sub>2</sub> Cl <sub>2</sub> | 0,075 M | 2                     | 90                          |
| <b>11</b> | White Kessil <sup>c,d</sup>    | CH <sub>2</sub> Cl <sub>2</sub> | 0,125 M | 2                     | 80                          |
| <b>12</b> | White Kessil <sup>c,d</sup>    | CH <sub>3</sub> CN              | 0.1 M   | 2                     | 30                          |
| <b>13</b> | White Kessil <sup>c,d</sup>    | DMSO                            | 0.1 M   | 2                     | -                           |
| <b>14</b> | White Kessil <sup>c,d</sup>    | THF                             | 0.1 M   | 2                     | -                           |
| <b>15</b> | White Kessil <sup>c,d</sup>    | MeNO <sub>2</sub>               | 0.1 M   | 2                     | 82                          |
| <b>16</b> | White Kessil <sup>c,d</sup>    | MeOH                            | 0.1 M   | 2                     | -                           |
| <b>17</b> | White Kessil <sup>c,d</sup>    | Toluene                         | 0.1 M   | 2                     | 8                           |
| <b>18</b> | No light (40 °C)               | DCM                             | 0.1 M   | 2                     | -                           |

<sup>a</sup> Conversion measured by <sup>1</sup>H NMR, <sup>b</sup> Kessil LED PR160L, <sup>c</sup> Kessil LED A160WE Tuna Blue, <sup>d</sup> Reaction temperature ~34 °C, <sup>f</sup> Isolated yield, <sup>e</sup> Second addition after 8 hours.

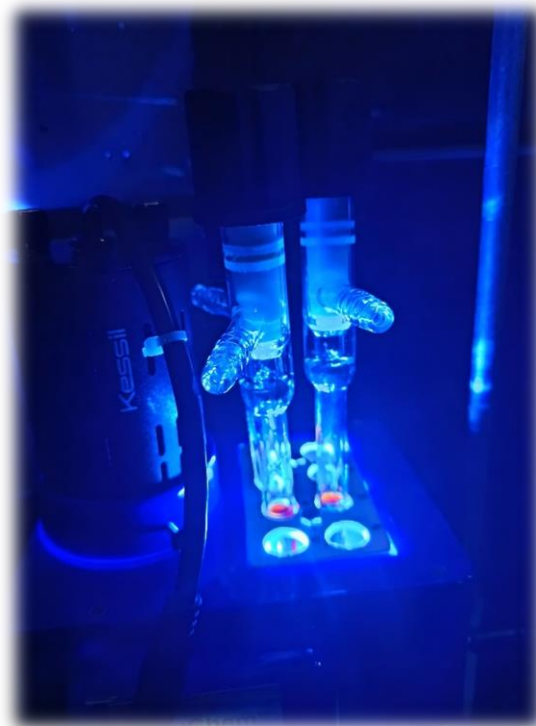

**Figure S3.** Reaction setup with Kessil LED in EvoluChem PhotoRedOx Box™ photoreactor.

### 3. General procedure

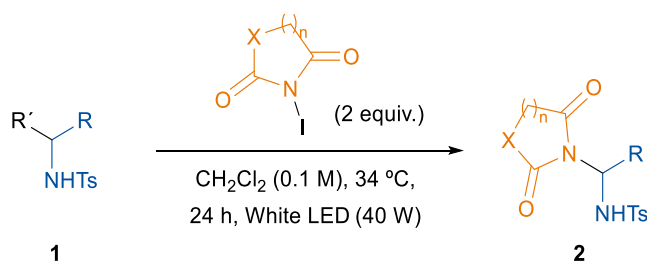

The corresponding sulfonamide **1** (0.20 mmol) and *N*-iodoimide (2 equiv., 0.40 mmol) were dissolved in CH<sub>2</sub>Cl<sub>2</sub> (0.1 M) under inert atmosphere. The reaction mixture was stirred under irradiation with a white LED Kessil® (40 W) in a EvoluChem PhotoRedOx Box™ photoreactor for 24 h. The solvent was evaporated and the corresponding 1,1-diamine **2** was purified by column chromatography.

### Unsuccessful substrates

The following scheme outlines the substrates that gave traces or no product under the optimised conditions:

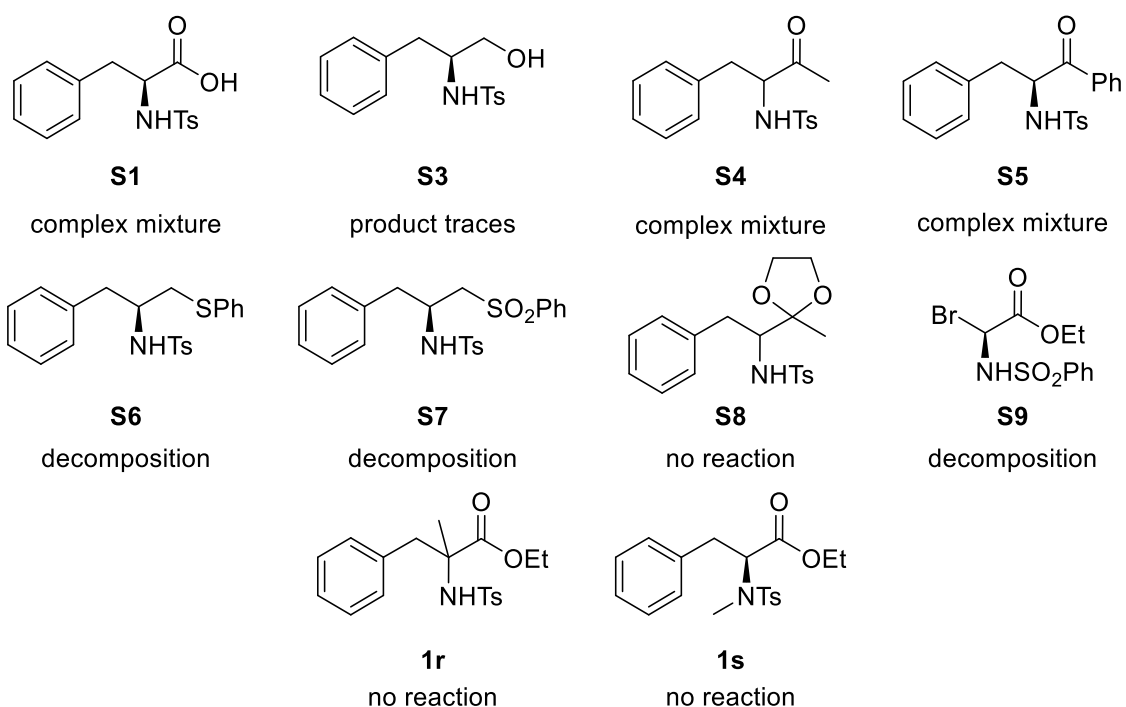

**Figure S4.** Unsuccessful substrates.

## 4. Characterization data

### 4.1 Substrates

#### (S)-Ethyl 2-(4-methylphenylsulfonamido)-3-phenylpropanoate (1a)

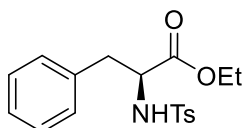

L-Phenylalanine ethyl ester hydrochloride (2.00 g, 1.0 equiv., 8.71 mmol), DMAP (21 mg, 0.02 equiv., 0.17 mmol) and TsCl (1.83 g, 1.1 equiv., 9.58 mmol) were dissolved in DCM (20 mL) under inert atmosphere. TEA (2.4 mL, 2 equiv., 17.41 mmol) was added dropwise and the reaction mixture was stirred at room temperature for 24 h. The crude mixture was then washed with an aqueous  $\text{NH}_4\text{Cl}$  saturated solution (4 x 15 mL) and brine (2 x 15 mL) and dried over anhydrous  $\text{MgSO}_4$ . The solvent was removed under reduced pressure and the residue was purified by flash chromatography eluting with Hex/EtOAc (7:3) to yield compound **1a** as a white solid (2.95 g, 98%).

**$^1\text{H}$  NMR** (400 MHz,  $\text{CDCl}_3$ )  $\delta$  7.64 ( $\text{A}_2\text{X}_2$  part A,  $J_{\text{AX}} = 8.3$  Hz, 2H), 7.27 – 7.21 (m, 5H), 7.08 ( $\text{A}_2\text{X}_2$  part X,  $J_{\text{XA}} = 8.3$  Hz, 2H), 5.03 (d,  $J = 9.1$  Hz, 1H), 4.18 (dt,  $J = 9.1, 6.0$  Hz, 1H), 3.91 and 3.90 ( $\text{ABX}_3$  part AB,  $J_{\text{AB}} = 0.9$  Hz,  $J_{\text{AX}} = J_{\text{BX}} = 7.2$  Hz, 2H), 3.03 (d,  $J = 6.0$  Hz, 2H), 2.40 (s, 3H), 1.05 ( $\text{ABX}_3$  part X,  $J_{\text{AX}} = J_{\text{BX}} = 7.2$  Hz, 3H) ppm.

**$^{13}\text{C}\{^1\text{H}\}$  NMR** (101 MHz,  $\text{CDCl}_3$ )  $\delta$  170.9, 143.7, 136.8, 135.1, 129.7, 129.6, 128.7, 127.4, 61.8, 56.8, 39.7, 21.6, 14.0 ppm.

NMR data were in agreement with those reported.<sup>1</sup>

**Mp.**: 70 – 72 °C; **HRMS-ESI**  $m/z$  calculated for  $\text{C}_{18}\text{H}_{21}\text{NO}_4\text{S}$   $[\text{M}+\text{H}]^+$  348.1264, found 348.1266.

$[\alpha]_D^{25} = -11.6$  ( $c = 0.99$ ,  $\text{CHCl}_3$ ).

#### (S)-Ethyl 2-(methylsulfonamido)-3-phenylpropanoate (1aMs)

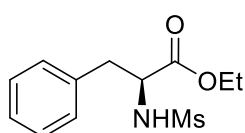

L-Phenylalanine ethyl ester hydrochloride (300 mg, 1.0 eq, 1.31 mmol), DMAP (3 mg, 0.02 eq, 26.12  $\mu\text{mol}$ ) and MsCl (0.1 mL, 1.1 eq, 1.44 mmol) were dissolved in DCM (8 mL) under inert atmosphere. TEA (0.4 mL, 2.1 eq, 2.74 mmol) was added dropwise and the reaction mixture was stirred at room temperature for 24 h. The crude mixture was then washed with an aqueous HCl 3M (2 x 15 mL) and brine (2 x 15 mL) and dried over anhydrous  $\text{MgSO}_4$ . The solvent was removed under reduced pressure and the residue was purified by flash chromatography eluting with Hex/EtOAc (4:6) to yield compound **1aMs** as a white solid (328 mg, 93 %).

**$^1\text{H}$  NMR** (400 MHz,  $\text{CDCl}_3$ )  $\delta$  7.31 – 6.96 (m, 5H), 5.34 (d,  $J = 9.3$  Hz, 1H), 4.27 (ddd,  $J = 9.3, 7.9, 5.4$  Hz, 1H), 4.11 (q,  $J = 7.1$  Hz, 2H), 3.06 (dd,  $J = 13.8, 5.4$  Hz, 1H), 2.91 (dd,  $J = 13.8, 7.9$  Hz, 1H), 2.55 (s, 3H), 1.17 (t,  $J = 7.1$  Hz, 3H) ppm.

**$^{13}\text{C}\{^1\text{H}\}$  NMR** (101 MHz,  $\text{CDCl}_3$ )  $\delta$  171.5, 135.8, 129.5, 128.6, 127.2, 61.9, 57.3, 41.1, 39.2, 14.0 ppm.

**Mp.**: 63 – 66 °C; **HRMS-ESI**  $m/z$  calculated for  $\text{C}_{12}\text{H}_{17}\text{NO}_4\text{S}$   $[\text{M}+\text{H}]^+$  272.0951, found 272.0951.

$[\alpha]_D^{25} = -5.8$  ( $c = 1.00$ ,  $\text{CHCl}_3$ ).

<sup>1</sup> A. I. Almansour, N. Arumugam, R. Suresh Kumar, J. C. Menéndez, H. A. Ghabbour, H.-K. Fun and R. Ranjith Kumar, *Tetrahedron Lett.*, 2015, **56**, 6900.

### (S)-Ethyl 2-((trifluoromethyl)sulfonamido)-3-phenylpropanoate (1aTf)

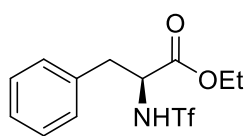

L-Phenylalanine ethyl ester hydrochloride (300 mg, 1.0 eq, 1.31 mmol) was suspended in DCM (8 ml) under inert atmosphere. TEA (0.4 ml, 2.1 eq, 2.74 mmol) was added and the reaction was stirred at room temperature for 10 minutes.

Then, at -78 °C, trifluoromethanesulfonic anhydride (0.2 ml, 1.1 eq, 1.44 mmol) was added dropwise and the reaction mixture was stirred at room temperature for 24 h. The crude mixture was then washed with H<sub>2</sub>O (2 x 15 ml) and brine (2 x 15 ml) and dried over anhydrous MgSO<sub>4</sub>. The solvent was removed under reduced pressure and the residue was purified by flash chromatography eluting with Hex/EtOAc (7:3) to yield compound **1aTf** as a white solid (362 mg, 85 %).

**<sup>1</sup>H NMR** (400 MHz, CDCl<sub>3</sub>) δ 7.36 – 7.27 (m, 3H), 7.20 – 7.01 (m, 2H), 5.50 (bs, 1H), 4.49 (t<sub>app</sub>, *J* = 5.8 Hz, 1H), 4.22 (ABX<sub>3</sub>, part AB, *J*<sub>AB</sub> = 7.1 Hz, *J*<sub>X</sub> = 2.1 Hz, 2H) 3.20 (dd, *J* = 14.0, 5.7 Hz, 1H), 3.12 (dd, *J* = 14.0, 6.0 Hz, 1H), 1.26 (t, *J* = 7.1 Hz, 3H) ppm.

**<sup>13</sup>C{<sup>1</sup>H} NMR** (101 MHz, CDCl<sub>3</sub>) δ 169.9, 134.1, 129.6, 129.0, 127.9, 119.5 (q, *J* = 320.9 Hz), 62.6, 58.0, 39.8, 14.1 ppm.

**<sup>19</sup>F NMR** (376 MHz, CDCl<sub>3</sub>) δ -77.4 – -77.5 (m)

**Mp.**: 66 – 70 °C; **HRMS-ESI** *m/z* calculated for C<sub>12</sub>H<sub>14</sub>F<sub>3</sub>NO<sub>4</sub>S [M+H]<sup>+</sup> 326.0668, found 326.0670.

[α]<sub>D</sub><sup>25</sup> = +20.4 (c = 1.00, CHCl<sub>3</sub>).

### (S)-Methyl-2-(4-methylphenylsulfonamido)-3-(4-(tosyloxy)phenyl)propanoate (1b)

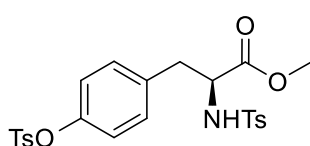

L-Tyrosine methyl ester hydrochloride (697 mg, 1.0 equiv., 3.01 mmol), DMAP (7 mg, 0.02 equiv., 0.06 mmol) and TsCl (1.26 g, 2.2 equiv., 6.62 mmol) were dissolved in DCM (17.5 mL) under inert atmosphere. TEA (1.3 mL, 3.2 equiv., 9.63 mmol) was added dropwise and the reaction mixture was stirred

at room temperature for 24 h. The crude mixture was then washed with an aqueous saturated NH<sub>4</sub>Cl solution (4 x 15 mL) and brine (2 x 15 mL) and dried over anhydrous MgSO<sub>4</sub>. The solvent was removed under reduced pressure and the residue was purified by flash chromatography eluting with Hex/EtOAc (6:4) to yield compound **1b** as a white solid (1.33 g, 87%).

**<sup>1</sup>H NMR** (400 MHz, CDCl<sub>3</sub>) δ 7.68 (A<sub>2</sub>X<sub>2</sub> system 1, part A, *J*<sub>AX</sub> = 8.4 Hz, 2H), 7.63 (A<sub>2</sub>X<sub>2</sub> system 2, part A, *J*<sub>AX</sub> = 8.4 Hz, 2H), 7.31 (A<sub>2</sub>X<sub>2</sub> system 1, part X, *J*<sub>XA</sub> = 8.4 Hz, 2H), 7.25 (A<sub>2</sub>X<sub>2</sub> system 2, part X, *J*<sub>XA</sub> = 8.4 Hz, 2H), 7.01 (A<sub>2</sub>X<sub>2</sub> system 3, part A, *J*<sub>AX</sub> = 7.9 Hz, 2H), 6.85 (A<sub>2</sub>X<sub>2</sub> system 3, part X, *J*<sub>XA</sub> = 7.9 Hz, 2H), 5.00 (d, *J* = 8.9 Hz, 1H), 4.13 (dt, *J* = 8.9, 6.0 Hz, 1H), 3.48 (s, 3H), 3.03 (dd, *J* = 13.9, 5.8 Hz, 1H), 2.96 (dd, *J* = 13.9, 5.8 Hz, 1H), 2.45 (s, 3H), 2.41 (s, 3H) ppm.

**<sup>13</sup>C{<sup>1</sup>H} NMR** (101 MHz, CDCl<sub>3</sub>) δ 171.1, 149.0, 145.6, 144.0, 136.6, 134.3, 132.4, 130.8, 129.9, 129.8, 128.7, 127.3, 122.6, 56.6, 52.6, 38.9, 21.9, 21.7 ppm.

**Mp.**: 111 – 114 °C; **HRMS-ESI** *m/z* calculated for C<sub>24</sub>H<sub>25</sub>NO<sub>7</sub>S<sub>2</sub> [M+H]<sup>+</sup> 504.1145, found 504.1150.

[α]<sub>D</sub><sup>25</sup> = +12.0 (c = 1.05, CHCl<sub>3</sub>).

### 1,3-Dioxoisindolin-2-yl-(2S)-2-((4-methylphenyl)sulfonamido)-3-phenylpropanoate (**1c**)

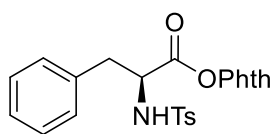

*N*-tosyl-L-Phenylalanine (900 mg, 1 equiv., 2.82 eq), DMAP (34 mg, 0.1 equiv., 0.28 eq), EDC hydrochloride (594 mg, 1.1 equiv., 3.10 mmol) and *N*-hydroxyphthalimide (552 mg, 1.2 equiv., 3.38 mmol) were dissolved in DCM (12 mL) under argon. Then, TEA (0.5 mL, 1.2 equiv., 3.38 mmol) was added

dropwise and the reaction was stirred at room temperature for 3 h. The crude mixture was washed with aqueous HCl 1M (3 x 15 mL), aqueous NaHCO<sub>3</sub> 5% (3 x 15 mL), brine (2 x 15 mL) and dried over anhydrous MgSO<sub>4</sub>. Later, the solvent was removed under reduced pressure and the residue was purified by flash chromatography eluting with Hex/EtOAc (65:35) to yield the ester **1c** as a yellowish solid (702 mg, 54%).

**<sup>1</sup>H NMR** (400 MHz, CDCl<sub>3</sub>) δ 7.87 – 7.80 (m, 2H), 7.79 – 7.73 (m, 2H), 7.63 (A<sub>2</sub>X<sub>2</sub> part A, *J*<sub>AX</sub> = 8.3 Hz, 2H), 7.30 – 7.16 (m, 7H), 5.00 (d, *J* = 9.8 Hz, 1H), 4.69 (dt, *J* = 9.8, 5.7 Hz, 1H), 3.30 (dd, *J* = 14.1, 5.8 Hz, 1H), 3.24 (dd, *J* = 14.1, 5.7 Hz, 1H), 2.36 (s, 3H) ppm.

**<sup>13</sup>C{<sup>1</sup>H} NMR** (101 MHz, CDCl<sub>3</sub>) δ 167.9, 161.2, 144.0, 136.5, 135.0, 133.6, 130.1, 130.0, 128.9, 128.8, 127.8, 127.1, 124.2, 54.7, 39.4, 21.7 ppm.

NMR data were in agreement with those reported.<sup>2</sup>

**Mp.**: 186 – 190 °C; **HRMS-ESI** *m/z* calculated for C<sub>24</sub>H<sub>20</sub>N<sub>2</sub>O<sub>6</sub>S [M+NH<sub>4</sub>]<sup>+</sup> 482.1380, found 482.1382.

[α]<sub>D</sub><sup>25</sup> = -4.6 (c = 1.00, CHCl<sub>3</sub>).

### (S)-*N*-Methoxy-*N*-methyl-2-((4-methylphenyl)sulfonamido)-3-phenylpropanamide (**1d**)

In a round bottom flask, L-Phenylalanine (2.00 g, 1 equiv., 12.1 mmol) and TsCl (2.30 g, 1 equiv., 12.1 mmol) were suspended in H<sub>2</sub>O (36 mL). Then, NaOH (1.45 g, 3 equiv., 36.3 mmol) was added in portions and the reaction was stirred at 40 °C during 24 h. The crude mixture was washed with EtOAc (3 x 30 mL) and acidified with aqueous HCl 3 M until pH = 2-3 was reached. Later, the aqueous layer was extracted with DCM (4 x 30 mL). The resulting organic layer was dried over anhydrous MgSO<sub>4</sub> and concentrated under reduced pressure to obtain the tosylamide **S1** as a white solid (2.01 g, 52 %).

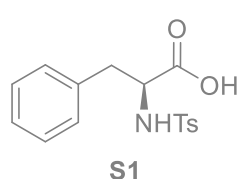

**<sup>1</sup>H NMR** (300 MHz, CDCl<sub>3</sub>) δ 7.60 (d, *J* = 8.0 Hz, 2H), 7.29 – 7.18 (m, 5H), 7.12 – 7.02 (m, 2H), 4.99 (d, *J* = 8.8 Hz, 1H), 4.22 (dt, *J* = 8.8, 5.9 Hz, 1H), 3.10 (dd, *J* = 13.9, 5.4 Hz, 1H), 3.00 (dd, *J* = 13.9, 6.4 Hz, 1H), 2.40 (s, 3H) ppm. <sup>1</sup>H NMR data were in agreement with those reported.<sup>3</sup>

Acid **S1** (590 mg, 1 equiv., 1.85 mmol) and *N,O*-dimethylhydroxylamine hydrochloride (198 mg, 1.1 equiv., 2.03 mmol) were suspended in DCM (6.2 mL) under inert atmosphere. Then, at 0 °C, *N*-methylmorpholine (0.3 mL, 1.4 equiv., 2.59 mmol) and DCC (419 mg, 1.1 equiv., 2.03 mmol) were added consecutively. The reaction mixture was stirred at room temperature for 24 h. Upon the completion of the coupling step, the crude was filtered using a pad of Celite® eluting with

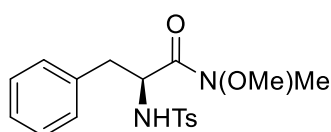

DCM, washed with aqueous saturated NaHCO<sub>3</sub> (3 x 20 mL) and brine (2 x 20 mL), dried over anhydrous MgSO<sub>4</sub> and concentrated under reduced pressure. Finally, the residue was purified by flash chromatography

<sup>2</sup> D. Reich, A. Noble and V. K. Aggarwal, *Angew. Chem. Int. Ed.*, 2022, **61**, e202207063.

<sup>3</sup> D. Ghosh, D. Sahu, S. Saravanan, S. H. R. Abdi, B. Ganguly, N. H. Khan, R. I. Kureshy and H. C. Bajaj, *Org. Biomol. Chem.*, 2013, **11**, 3451.

eluting with Hex/EtOAc (1:1) to obtain the Weinreb amide **1d** as a white solid (425 mg, 63%).

**<sup>1</sup>H NMR** (400 MHz, CDCl<sub>3</sub>) δ 7.67 (d, *J* = 7.9 Hz, 2H), 7.34 – 7.22 (m, 5H), 7.21 – 7.14 (m, 2H), 6.00 (d, *J* = 9.9 Hz, 1H), 4.61 (q, *J* = 7.7 Hz, 1H), 3.48 (s, 3H), 3.10 – 3.01 (m, 4H), 2.91 (dd, *J* = 13.6, 7.4 Hz, 1H), 2.43 (s, 3H) ppm.

**<sup>13</sup>C{<sup>1</sup>H} NMR** (101 MHz, CDCl<sub>3</sub>) δ 171.0, 143.1, 137.0, 135.9, 129.4, 129.3, 128.3, 127.0, 126.7, 61.2, 54.0, 39.4, 31.9, 21.4 ppm.

NMR data were in agreement with those reported.<sup>4</sup>

**Mp.**: 92 – 96 °C; **HRMS-ESI** *m/z* calculated for C<sub>18</sub>H<sub>22</sub>N<sub>2</sub>O<sub>4</sub>S [M+H]<sup>+</sup> 363.1300, found 363.1372.

[α]<sub>D</sub><sup>25</sup> = +43.6 (c = 1.00, CHCl<sub>3</sub>).

### (S)-N-Methyl-2-(4-methylsulfonylamido)-3-phenylpropanamide (**1e**)

L-Phenylalanine (2.00 g, 1 equiv., 12.11 mmol), aqueous NaOH 1 M (20 mL) and 1,4-dioxane (10 mL) were added in a round bottom flask. Then, in an ice bath, di-*tert*-butyl-dicarbonate (3.17 g, 1.2 equiv., 14.53 mmol) was added and the reaction mixture was stirred at room temperature for 24 h. Dioxane was removed under reduced pressure and the aqueous phase was washed with Et<sub>2</sub>O (3 x 15 mL). Later, aqueous HCl 3 M was added until pH = 2-3 was reached and the aqueous phase was extracted with EtOAc (3 x 20 mL). The organic layer was dried over anhydrous MgSO<sub>4</sub> and concentrated under reduced pressure to obtain the carbamate **S2** as a colorless oil (3.21 g, quant.) that was used without further purification.

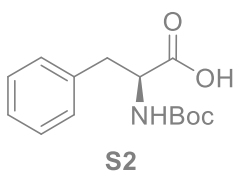

**<sup>1</sup>H NMR** (300 MHz, CDCl<sub>3</sub>) δ 7.37 – 7.10 (m, 5H), 4.92, 4.60 (m, 1H, 2 conformers), 3.29 – 3.03 (m, 2H), 1.42 (s, 9H) ppm. <sup>1</sup>H NMR data were in agreement with those reported.<sup>5</sup>

Carbamate **S2** (1.50 g, 1.0 equiv., 5.65 mmol), methylamine hydrochloride (763 mg, 2 equiv., 11.31 mmol) and TBTU (2.00 g, 1.1 equiv., 6.22 mmol) were dissolved in ACN (60 mL) under inert atmosphere. DIPEA (5.0 mL, 5 equiv., 28.27 mmol) was added dropwise and the reaction mixture was stirred at room temperature for 24 h. Then, the crude mixture was concentrated under reduced pressure, redissolved in EtOAc (20 mL) and washed with aqueous HCl 0.1 M (3 x 20 mL), aqueous NaHCO<sub>3</sub> 5% m/m (3 x 20 mL) and brine (2 x 20 mL). The resulting organic layer was dried over anhydrous MgSO<sub>4</sub>, concentrated under reduced pressure and purified by flash chromatography eluting with Hex/EtOAc (3:7) to yield methyl amide derivative as a white solid (871 mg, 55 %).

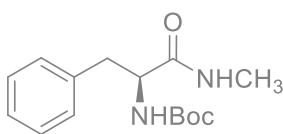

**<sup>1</sup>H NMR** (300 MHz, CDCl<sub>3</sub>) δ 7.61 – 7.04 (m, 5H), 5.00 (s, 1H), 4.69 (s, 1H), 3.52 – 2.87 (m, 3H), 2.07 (s, 3H), 1.48 (s, 9H) ppm. <sup>1</sup>H NMR data were in agreement with those reported.<sup>6</sup>

In a round bottom flask, amide derivative was dissolved in DCM (15 mL). Then, in an ice bath, TFA (15 mL) was added dropwise and the reaction mixture was stirred for 30 minutes. After that, the reaction was stirred at room temperature for 2.5 h. TFA and DCM were removed under reduced pressure to obtain the ammonium salt as an orange liquid (850 mg, 93 %) that was used

<sup>4</sup> T. Niu, K.-H. Wang, D. Huang, C. Xu, Y. Su, Y. Hu and Y. Fu, *Synthesis*, 2013, **46**, 320.

<sup>5</sup> A. Karmakar, M. Basha, G. T. Venkatesh Babu, M. Botlagunta, N. A. Malik, R. Rampulla, A. Mathur and A. K. Gupta, *Tetrahedron Lett.*, 2018, **59**, 4267.

<sup>6</sup> A. E. Sheshenev, E. V. Boltukhina, A. A. Grishina, I. Cisařova, I. M. Lyapkalo and K. K. (Mimi) Hii, *Chem. Eur. J.*, 2013, **19**, 8136.

without further purification. Ammonium salt (850 mg, 1.0 equiv., 2.91 mmol), DMAP (7 mg, 0.02 equiv., 58.17  $\mu$ mol) and TsCl (610 g, 1.1 equiv., 3.20 mmol) were dissolved in DCM (10 mL) under inert atmosphere. TEA (0.9 mL, 2.1 equiv., 6.11 mmol) was added dropwise and the reaction mixture was stirred at room temperature for 24 h. The crude mixture was then washed with an aqueous  $\text{NH}_4\text{Cl}$

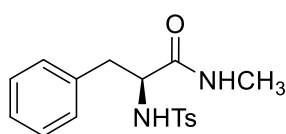

saturated solution (4 x 15 mL) and brine (2 x 15 mL) and dried over anhydrous  $\text{MgSO}_4$ . The solvent was removed under reduced pressure and the residue was purified by flash chromatography eluting with Hex/EtOAc (3:7) to yield compound **1e** as a white solid (249 mg, 26%).

**$^1\text{H}$  NMR** (400 MHz,  $\text{CD}_3\text{OD}$ )  $\delta$  7.56 ( $\text{A}_2\text{X}_2$  part A,  $J_{\text{AX}} = 8.1$  Hz, 2H), 7.24 ( $\text{A}_2\text{X}_2$  part X,  $J_{\text{XA}} = 8.1$ , 2H), 7.20 – 7.12 (m, 3H), 7.09 – 7.02 (m, 2H), 3.88 (dd,  $J = 8.1$ , 6.7 Hz, 1H), 2.94 (dd,  $J = 13.6$ , 6.7 Hz, 1H), 2.72 (dd,  $J = 13.6$ , 8.1 Hz, 1H), 2.48 (s, 3H), 2.41 (s, 3H) ppm.

**$^{13}\text{C}\{^1\text{H}\}$  NMR** (101 MHz,  $\text{CD}_3\text{OD}$ )  $\delta$  173.6, 144.6, 138.7, 137.8, 130.5, 130.2, 129.4, 128.1, 127.7, 59.8, 40.0, 26.1, 21.4 ppm.

**Mp.**: 157 – 160  $^\circ\text{C}$ ; **HRMS-ESI**  $m/z$  calculated for  $\text{C}_{17}\text{H}_{20}\text{N}_2\text{O}_3\text{S}$   $[\text{M}+\text{H}]^+$  333.1267, found 333.1269

$[\alpha]_D^{25} = +2.2$  ( $c = 0.99$ , MeOH).

### (S)-N-Benzyl-2-(4-methylphenyl)sulfonamido-3-phenylpropanamide (**1f**)

Carbamate **S1** (1.00 g, 1.0 equiv., 3.77 mmol), and TBTU (1.45 g, 1.2 equiv., 4.52 mmol) were dissolved in acetonitrile (40 mL) under inert atmosphere. DIPEA (3.3 mL, 5 equiv., 18.85 mmol) and benzylamine (0.8 mL, 2 equiv., 7.54 mmol) were added dropwise and the reaction mixture was stirred at room temperature for 24 h. Upon the completion of the reaction, the crude mixture was concentrated under reduced pressure, redissolved in EtOAc (20 mL) and washed with aqueous HCl 0.1 M (3 x 20 mL), aqueous  $\text{NaHCO}_3$  5% m/m (3 x 20 mL) and brine (2 x 20 mL). The resulting organic layer was dried over anhydrous  $\text{MgSO}_4$ , concentrated under reduced pressure and purified by flash chromatography eluting with Hex/EtOAc (7:3) to yield benzyl amide as a white solid (591 mg, 44 %).

**$^1\text{H}$  NMR** (300 MHz,  $\text{CDCl}_3$ )  $\delta$  7.31 – 7.14 (m, 8H), 7.13 – 7.03 (m, 2H), 6.64 (bs, 1H), 5.36 (d,  $J = 8.4$  Hz, 1H), 4.60 – 4.19 (m, 3H), 3.05 (bs, 2H), 1.37 (s, 9H) ppm.  $^1\text{H}$  NMR data were in agreement with those reported.<sup>7</sup>

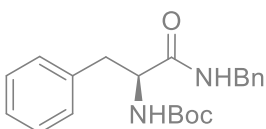

In a round bottom flask, benzyl amide was dissolved in DCM (10 mL). Then, in an ice bath, TFA (10 mL) was added dropwise, and the reaction mixture was

stirred for 30 minutes. After that, the reaction was stirred at room temperature for 2.5 h. TFA and DCM were removed under reduced pressure to obtain the ammonium salt as an orange liquid (614 mg, quant) that was used without further purification. Ammonium salt (614 mg, 1.0 equiv., 1.67 mmol), DMAP (4 mg, 0.02 equiv., 33.34  $\mu$ mol) and TsCl (350 mg, 1.1 equiv., 1.83 mmol) were dissolved in DCM (13 mL) under inert atmosphere. TEA (0.5 mL, 2.2 equiv., 3.67 mmol) was added dropwise and the reaction mixture was stirred at room temperature for 24 h. The crude mixture was then washed with an aqueous

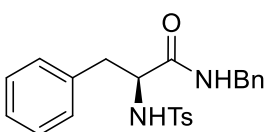

$\text{NH}_4\text{Cl}$  saturated solution (3 x 10 mL) and brine (2 x 10 mL) and dried over anhydrous  $\text{MgSO}_4$ . The solvent was removed under reduced pressure and the residue was purified by flash chromatography eluting with Hex/EtOAc (6:4) to yield compound **1f** as a white solid (443 mg, 65%).

<sup>7</sup> Y. Saito, H. Ouchi and H. Takahata, *Tetrahedron*, 2008, **64**, 11129.

**<sup>1</sup>H NMR** (400 MHz, CDCl<sub>3</sub>) δ 7.58 (A<sub>2</sub>X<sub>2</sub>, part A, *J*<sub>AX</sub> = 8.4 Hz, 2H), 7.38 – 7.08 (m, 10H), 6.89 (A<sub>2</sub>X<sub>2</sub>, part X, *J*<sub>XA</sub> = 8.4 Hz, 2H), 6.47 (t, *J* = 5.2 Hz, 1H), 4.83 (d, *J* = 6.9 Hz, 1H), 4.38 (dd, *J* = 14.8, 6.0 Hz, 1H), 4.30 (dd, *J* = 14.8, 5.6 Hz, 1H), 3.90 (q<sub>app</sub>, *J* = 6.6 Hz, 1H), 3.04 (dd, *J* = 13.9, 6.6 Hz, 1H), 2.86 (dd, *J* = 13.9, 6.4 Hz, 1H), 2.44 (s, 3H) ppm.

**<sup>13</sup>C{<sup>1</sup>H} NMR** (101 MHz, CDCl<sub>3</sub>) δ 170.0, 144.2, 137.5, 135.8, 135.2, 130.0, 129.3, 129.2, 128.8, 127.8, 127.7, 127.5, 127.3, 58.0, 43.8, 38.4, 21.8 ppm.

**Mp.:** 152 – 156 °C; **HRMS-ESI** *m/z* calculated for C<sub>23</sub>H<sub>24</sub>N<sub>2</sub>O<sub>3</sub>S [M+H]<sup>+</sup> 409.1580, found 409.1580.

[α]<sub>D</sub><sup>25</sup> = -9.6 (c = 1.00, CHCl<sub>3</sub>).

Characterization data were in agreement with those reported.<sup>8</sup>

### (S)-2-((4-Methylphenyl)sulfonamido)-N-((S)-1-(naphthalen-1-yl)ethyl)-3-phenylpropanamide (1g)

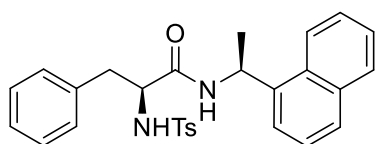

*N*-Tosyl-Phenylalanine (300 mg, 1 equiv., 0.94 mmol) were dissolved in DCM (5.0 mL) and DMF (5.0 mL). Then, EDC·HCl (223 mg, 1.25 equiv., 1.17 mmol) and HOBT (159 mg, 1.25 equiv., 1.17 mmol) were added in portions and the reaction was stirred at room temperature for 5 minutes.

Then, (S)-(-)-(1-naphthyl)ethylamine (0.2 mL, 1.3 equiv., 1.22 mmol) and DIPEA (0.6 mL, 4 equiv., 3.76 mmol) were added dropwise. The reaction was stirred at room temperature for 24 h. Upon completion of the reaction, the crude was washed with H<sub>2</sub>O (8 x 15 mL), aqueous HCl 3 M (2 x 15 mL) and brine (2 x 15 mL). The organic layer was dried over anhydrous MgSO<sub>4</sub>, concentrated under reduced pressure and purified by flash chromatography eluting with Hex/EtOAc (7:3) to yield the amide **1g** as a white solid (120 mg, 27%)

**<sup>1</sup>H NMR** (400 MHz, CDCl<sub>3</sub>) δ 8.06 – 7.96 (m, 1H), 7.91 – 7.85 (m, 1H), 7.77 (d, *J* = 7.9 Hz, 1H), 7.59 – 7.46 (m, 4H), 7.39 (t<sub>app</sub>, *J* = 7.9 Hz, 1H), 7.30 (d, *J* = 7.9 Hz, 1H), 7.17 – 7.07 (m, 3H), 7.09 – 7.00 (m, 2H), 6.94 – 6.84 (m, 2H), 6.30 (d, *J* = 8.1 Hz, 1H), 5.78 (quin<sub>app</sub>, *J* = 7.0 Hz, 1H), 5.04 (d, *J* = 7.6 Hz, 1H), 3.90 (q<sub>app</sub>, *J* = 6.7 Hz, 1H), 3.08 (dd, *J* = 13.9, 6.1 Hz, 1H), 2.82 (dd, *J* = 13.9, 6.8 Hz, 1H), 2.38 (s, 3H), 1.47 (d, *J* = 6.8 Hz, 3H) ppm.

**<sup>13</sup>C{<sup>1</sup>H} NMR** (101 MHz, CDCl<sub>3</sub>) δ 168.9, 144.0, 138.0, 136.1, 135.3, 134.0, 130.9, 129.9, 129.4, 129.0, 128.4, 127.3, 127.3, 126.6, 125.9, 125.5, 123.3, 122.6, 57.8, 45.2, 38.7, 21.7, 21.3 ppm.

**Mp.:** 195 – 198 °C; **HRMS-ESI** *m/z* calculated for C<sub>28</sub>H<sub>28</sub>N<sub>2</sub>O<sub>3</sub>S [M+H]<sup>+</sup> 473.1893 found 473.1889.

[α]<sub>D</sub><sup>25</sup> = -11.6 (c = 0.88, CHCl<sub>3</sub>).

Characterization data were in agreement with those reported.<sup>3</sup>

### N-(1-Cyano-2-phenylethyl)-4-methylbenzenesulfonamide (1h)

2-((Diphenylmethylene)amino)acetonitrile (1.5 g, 1 equiv., 6.81 mmol) and TEBAC (155 mg, 0.1 equiv., 0.68 mmol) were dissolved in DCE (34 mL) under inert atmosphere. Later, benzyl bromide (0.9 mL, 1.1 equiv., 7.49 mmol) and aqueous NaOH 10 M (6.2 mL, 10 equiv., 68 mmol) were added dropwise to obtain an orange suspension. The reaction was stirred at room temperature for 24 h. Upon completion of the reaction, H<sub>2</sub>O was added and the crude mixture was extracted with DCM (3 x 20 mL). The combined organic layers were dried over anhydrous MgSO<sub>4</sub> and concentrated under reduced pressure to finally obtain the desired benzyl imine as an orange oil that was used in the next step without further

<sup>8</sup> S. Gou and Z. M. A. Judeh, *Chirality*, 2011, **23**, 105.



purification. Imine (2.11 g, 1 equiv., 6.80 eq) was suspended in THF (34 mL) and aqueous HCl 1M (20 mL) in a round bottom flask. The reaction was stirred at room temperature for 3 h, resulting in a bright yellow solution. Later, THF was removed under reduced pressure and the mixture was basified with aqueous NaOH 3 M until pH = 10 – 12 was obtained. Then, the crude was extracted with EtOAc (3 x 20 mL), dried over anhydrous MgSO<sub>4</sub> and concentrated to obtain de amine (714 mg, 72 % over 2 steps) as a yellow oil.

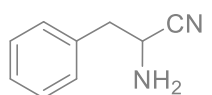

<sup>1</sup>H NMR (300 MHz, CDCl<sub>3</sub>) δ 7.35 – 7.10 (m, 5H), 3.75 (t, *J* = 6.7 Hz, 1H), 2.98 – 2.76 (m, 2H), 1.59 (bs, 2H) ppm. <sup>1</sup>H NMR data were in agreement with those reported.<sup>9</sup> Synthesized according to the literature procedure.<sup>10</sup>

Amine (100 mg, 1 equiv., 0.68 mmol) and TsCl (130 mg, 1 equiv., 0.68 mmol) were dissolved in pyridine (1.6 mL) under inert atmosphere. The reaction was stirred at room temperature for 72 h. Then, DCM was added to the reaction and the mixture was washed with aqueous HCl 3 M (6 x 10 mL) and brine (2 x 15 mL). The organic layer was dried over MgSO<sub>4</sub> and concentrated under reduced pressure. The residue was purified by flash chromatography eluting with Hex/EtOAc (65:35) to yield sulfonamide **1h** (149 mg, 73%) as a white solid.

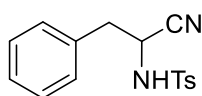

<sup>1</sup>H NMR (400 MHz, CD<sub>3</sub>COCD<sub>3</sub>) δ 7.68 (d, *J* = 7.8 Hz, 2H), 7.46 (bs, 1H), 7.34 (d, *J* = 7.8 Hz, 2H), 7.27 (s, 5H), 4.60 (t<sub>app</sub>, *J* = 7.2 Hz, 1H), 3.22 – 3.01 (m, 2H), 2.40 (s, 3H) ppm.

<sup>13</sup>C{<sup>1</sup>H} NMR (101 MHz, CD<sub>3</sub>COCD<sub>3</sub>) δ 144.5, 138.3, 135.6, 130.5, 130.4, 129.3, 128.2, 127.8, 118.7, 46.6, 40.3, 21.4 ppm.

NMR data were in agreement with those reported.<sup>11</sup>

**Mp.**: 112 – 115 °C; **HRMS-ESI** *m/z* calculated for C<sub>16</sub>H<sub>16</sub>N<sub>2</sub>O<sub>2</sub>S [M+H]<sup>+</sup> 301.1005, found 301.1003

#### 4-Methyl-N-phenylethylbenzenesulfonamide (**1i**)

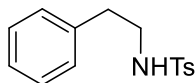

2-Phenylethylamine (0.10 mL, 1.0 equiv., 0.82 mmol), DMAP (2 mg, 0.02 equiv., 0.02 mmol) and TsCl (173 mg, 1.1 equiv., 0.91 mmol) were dissolved in DCM (5 mL) under inert atmosphere. TEA (0.2 mL, 2 equiv., 1.65 mmol) was added dropwise and the reaction mixture was stirred at room temperature for 24 h. The crude mixture was then washed with an aqueous NH<sub>4</sub>Cl saturated solution (4 x 5 mL) and brine (2 x 5 mL) and dried over anhydrous MgSO<sub>4</sub>. The solvent was removed under reduced pressure and the residue was purified by flash chromatography eluting with Hex/EtOAc (6:4) to yield compound **1i** as a white solid (217 mg, 95%).

<sup>1</sup>H NMR (400 MHz, CDCl<sub>3</sub>) δ 7.70 (A<sub>2</sub>X<sub>2</sub> part A, *J*<sub>AX</sub> = 8.3 Hz, 2H), 7.34 – 7.18 (m, 5H), 7.11 – 7.06 (m, 2H), 4.49 (t, *J* = 6.3 Hz, 1H), 3.22 (q<sub>app</sub>, *J* = 6.8 Hz, 2H), 2.76 (t, *J* = 7.0 Hz, 2H), 2.43 (s, 3H) ppm.

<sup>13</sup>C{<sup>1</sup>H} NMR (101 MHz, CDCl<sub>3</sub>) δ 143.5, 137.8, 137.0, 129.8, 128.9, 128.9, 127.2, 126.9, 44.3, 35.9, 21.6 ppm.

NMR data were in agreement with those reported.<sup>12</sup>

**Mp.**: 57 – 60 °C; **HRMS-ESI** *m/z* calculated for C<sub>15</sub>H<sub>17</sub>NO<sub>2</sub>S [M+H]<sup>+</sup> 276.1053, found 276.1055.

<sup>9</sup> A. J. Wagner, D. Yu. Zubarev, A. Aspuru-Guzik and D. G. Blackmond, *ACS Cent. Sci.*, 2017, **3**, 322.

<sup>10</sup> G. Wu, Y. Deng, C. Wu, Y. Zhang and J. Wang, *Angew. Chem. Int. Ed.*, 2014, **53**, 10510.

<sup>11</sup> L. Zhou, S. Wei, Z. Lei, G. Zhu and Z. Zhang, *Chem. - Eur. J.*, 2021, **27**, 7103.

<sup>12</sup> R. Pothikumar, C. Sivaraj, K. Giridharan, M. K. Ravva and K. Namitharan, *Org. Lett.*, 2022, **24**, 4310.

### ***N*-(2,2-Diphenylethyl)-4-methylbenzenesulfonamide (1i')**

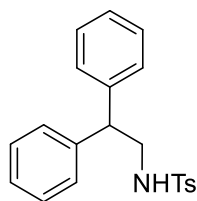

2,2-Diphenylethylamine (300 mg, 1.0 equiv., 1.52 mmol), DMAP (4 mg, 0.02 equiv., 30.41  $\mu$ mol) and TsCl (319 mg, 1.1 equiv., 1.67 mmol) were dissolved in DCM (9.0 mL) under inert atmosphere. TEA (0.2 mL, 1.1 equiv., 1.67 mmol) was added dropwise and the reaction mixture was stirred at room temperature for 24 h. The crude mixture was then washed with aqueous HCl 1 M (3 x 15 mL) and brine (2 x 15 mL) and dried over anhydrous  $\text{MgSO}_4$ . The solvent was removed under reduced pressure and the residue was purified by flash chromatography eluting with Hex/EtOAc (8:2) to yield compound **1i'** as a white solid (501 mg, 94%).

**$^1\text{H}$  NMR** (400 MHz,  $\text{CDCl}_3$ )  $\delta$  7.69 ( $\text{A}_2\text{X}_2$ , part A,  $J_{\text{AX}} = 8.3$  Hz, 2H), 7.34 – 7.14 (m, 8H), 7.15 – 7.05 (m, 4H), 4.30 (t,  $J = 6.2$  Hz, 1H), 4.07 (t,  $J = 7.9$  Hz, 1H), 3.56 (dd,  $J = 7.9, 6.2$  Hz, 2H), 2.45 (s, 3H) ppm.

**$^{13}\text{C}\{^1\text{H}\}$  NMR** (101 MHz,  $\text{CDCl}_3$ )  $\delta$  143.7, 140.8, 136.9, 129.9, 129.0, 128.1, 127.3, 127.3, 50.7, 47.4, 21.7 ppm.

NMR data were in agreement with those reported.<sup>13</sup>

**Mp.:** 127 – 130  $^\circ\text{C}$ ; **HRMS-ESI**  $m/z$  calculated for  $\text{C}_{21}\text{H}_{21}\text{NO}_2\text{S}$   $[\text{M}+\text{H}]^+$  352.1366 found 352.1362.

### ***N*-(1,3-Diphenylpropan-2-yl)-4-methylbenzenesulfonamide (1j)**

1,3-diphenylpropan-2-one (798 mg, 1 equiv., 3.80 mmol) was dissolved in MeOH (13 mL) under inert atmosphere. Then,  $\text{NH}_4\text{OAc}$  (2.64 g, 9 equiv., 34.24 mmol) and  $\text{NaBH}_3\text{CN}$  (503 mg, 2 equiv., 7.61 mmol) were added in portions and the mixture was stirred at room temperature for 24 h. Later, the crude was acidified with aqueous HCl 4 M until pH = 2-3 was reached and washed with DCM (3 x 20 mL). Then, the aqueous layer was basified with aqueous NaOH 10 M until pH = 10-12 was reached and extracted with DCM (3 x 20 mL). This organic layer was dried over anhydrous  $\text{MgSO}_4$  and concentrated under reduced pressure to obtain the amine as a colourless oil.

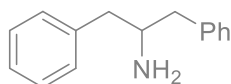

**$^1\text{H}$  NMR** (300 MHz,  $\text{CDCl}_3$ )  $\delta$  7.43 – 7.20 (m, 10H), 3.32 (tt,  $J = 8.9, 4.7$ , 1H), 2.88 (dd,  $J = 13.3, 4.7$ , 2H), 2.59 (dd,  $J = 13.3, 8.7$  Hz, 2H), 1.40 (bs, 2H) ppm.  $^1\text{H}$  NMR data were in agreement with those reported.<sup>14</sup> Synthesized according to the literature

procedure.<sup>15</sup>

Amine (734 mg, 1 equiv., 3.47 mmol), DMAP (8 mg, 0.02 equiv., 69.49  $\mu$ mol) and TsCl (795 mg, 1.2 equiv., 4.17 mmol) were dissolved with DCM (20 mL) under inert atmosphere. Then, TEA (0.6 mL, 1.2 equiv., 4.17 mL) was added dropwise and the reaction was stirred at room temperature for 24 h. Later, the crude was washed with aqueous HCl 0.4 M (3 x 10 mL) and brine (2 x 10 mL). The organic layer was dried

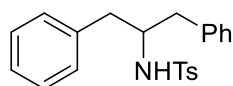

over anhydrous  $\text{MgSO}_4$  and concentrated under reduced pressure. The crude was then purified by flash chromatography eluting with Hex/EtOAc (8:2) to obtain the sulfonamide **1j** as a white solid (452 mg, 36%)

**$^1\text{H}$  NMR** (400 MHz,  $\text{CDCl}_3$ )  $\delta$  7.28 ( $\text{A}_2\text{X}_2$  part A,  $J_{\text{AX}} = 8.4$  Hz, 2H), 7.08 – 6.99 (m, 6H), 6.94 – 6.86 (m, 6H), 4.92 (d,  $J = 7.4$  Hz, 1H), 3.48 (h,  $J = 6.8$  Hz, 1H), 2.70 – 2.54 (m, 4H), 2.19 (s, 3H) ppm.

<sup>13</sup> G. Yang, Y. Wang and Y. Qiu, *Chem. - Eur. J.*, 2023, **29**, e202300959.

<sup>14</sup> G. Blankson, A. K. Parhi, M. Kaul, D. S. Pilch and E. J. LaVoie, *Eur. J. Med. Chem.*, 2019, **178**, 30.

<sup>15</sup> J. Albarrán-Velo, V. Gotor-Fernández and I. Lavandera, *Adv. Synth. Catal.*, 2021, **363**, 4096.

**<sup>13</sup>C{<sup>1</sup>H} NMR** (101 MHz, CDCl<sub>3</sub>) δ 142.6, 137.4, 137.0, 129.3, 129.3, 128.3, 126.6, 126.3, 56.7, 40.9, 21.3 ppm.

NMR data were in agreement with those reported.<sup>16</sup>

**Mp.:** 92 – 96 °C; **HRMS-ESI** m/z calculated for C<sub>22</sub>H<sub>23</sub>NO<sub>2</sub>S [M+H]<sup>+</sup> 366.1522, found 366.1522.

### (S)-N-(1-Hydroxy-3-phenylpropan-2-yl)-4-methylbenzensulfonamide (S3)

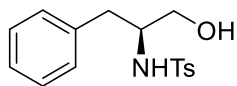

L-Phenylalaninol (1.3 g, 1 equiv., 8.60 mmol), DMAP (21 mg, 0.02 equiv., 0.17 mmol) and TsCl (1.64 g, 1 equiv., 8.60 mmol) were dissolved with DCM (50 mL) under inert atmosphere. Then, TEA (1.3 mL, 1.1 equiv., 9.46 mmol) was added

dropwise and the reaction was stirred at room temperature for 24 h. Later, the crude was washed with aq. HCl 0.4 M (3 x 30 mL) and brine (2 x 30 mL). The organic layer was dried over anhydrous MgSO<sub>4</sub> and concentrated under reduced pressure. The crude was then purified by flash chromatography eluting with Hex/EtOAc (6:4) to obtain the sulfonamide **S3** as a white solid (2.1 g, 76%).

**<sup>1</sup>H NMR** (400 MHz, CDCl<sub>3</sub>) δ 7.62 (A<sub>2</sub>X<sub>2</sub> part A, J<sub>AX</sub> = 8.0 Hz, 2H), 7.18 (A<sub>2</sub>X<sub>2</sub> part X, J<sub>XA</sub> = 8.0 Hz, 2H), 7.16 – 7.12 (m, 3H), 7.04 – 6.95 (m, 2H), 5.63 (d, J = 7.6 Hz, 1H), 3.65 (ddd, J = 11.1, 6.2, 3.7 Hz, 1H), 3.58 – 3.42 (m, 2H), 3.09 (t, J = 5.8 Hz, 1H), 2.78 (dd, J = 13.8, 7.2 Hz, 1H), 2.66 (dd, J = 13.8, 7.0 Hz, 1H), 2.39 (s, 3H) ppm.

**<sup>13</sup>C{<sup>1</sup>H} NMR** (101 MHz, CDCl<sub>3</sub>) δ 143.3, 137.2, 137.1, 129.7, 129.2, 128.5, 127.0, 126.5, 63.9, 56.9, 37.7, 21.5 ppm.

NMR data were in agreement with those reported.<sup>17</sup>

**Mp.:** 76 – 79 °C; **HRMS-ESI** m/z calculated for C<sub>16</sub>H<sub>19</sub>NO<sub>3</sub>S [M+H]<sup>+</sup> 306.1158, found 306.1158.

[α]<sub>D</sub><sup>25</sup> = -23.1 (c = 1.00, CHCl<sub>3</sub>).

### (S)-N,N'-(3-Phenylpropane-1,2-diyl)bis(4-methylbenzensulfonamide) (1k)

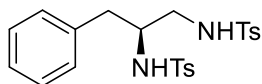

Alcohol **S3** (420 mg, 1 equiv., 1.38) and PPh<sub>3</sub> (721 mg, 2 equiv., 2.75 mmol) and TsNH<sub>2</sub>Boc (932 mg, 2.5 equiv., 3.44 mmol) were dissolved in THF (8.0 mL) under inert atmosphere. Then, at 0 °C, DIAD (0.4 mL, 1.5 equiv., 2.06 mmol) were

added dropwise. The reaction was stirred at 55 °C for 24 h. The solvent was then removed under reduced pressure and the residue was purified by flash chromatography eluting with Hex/EtOAc (7:3) to obtain an impure fraction containing the protected sulfonamide (54 % purity), that was used in the next step without further purification.

The sulfonamide was dissolved in DCM (10 mL) and TFA (10 mL) was added dropwise at 0 °C. The mixture was stirred at 0 °C for 30 minutes and 2.5 h at room temperature. Upon completion of the reaction, the crude was concentrated under reduced pressure and purified by flash chromatography eluting with DCM/EtOAc (9:1) to obtain the desired compound as a white solid (220 mg, 29%)

**<sup>1</sup>H NMR** (400 MHz, CDCl<sub>3</sub>) δ 7.69 (A<sub>2</sub>X<sub>2</sub> system 1, part A, J<sub>AX</sub> = 8.3 Hz, 2H), 7.51 (A<sub>2</sub>X<sub>2</sub> system 2, part A, J<sub>AX</sub> = 8.3 Hz, 2H), 7.22 (d, J = 8.3 Hz, 2H), 7.17 – 7.02 (m, 5H), 6.90 – 6.79 (m, 2H), 5.69 (t, J = 6.4 Hz, 1H), 5.47

<sup>16</sup> X.-F. Bai, Q.-C. Mu, Z. Xu, K.-F. Yang, L. Li, Z.-J. Zheng, C.-G. Xia and L.-W. Xu, *ACS Catal.*, 2019, **9**, 1431.

<sup>17</sup> P. M. Shukla, A. Pratap and B. Maji, *Org. Biomol. Chem.*, 2024, **22**, 501.

(d,  $J = 7.4$  Hz, 1H), 3.43 – 3.32 (dtd,  $J = 12.2, 7.3, 4.9$  Hz, 1H), 3.07 – 2.96 (m, 2H), 2.74 (dd,  $J = 14.0, 6.8$  Hz, 1H), 2.57 (dd,  $J_{BA} = 14.0, 7.5$  Hz, 1H), 2.37 (s, 3H), 2.36 (s, 3H) ppm.

$^{13}\text{C}\{^1\text{H}\}$  NMR (101 MHz,  $\text{CDCl}_3$ )  $\delta$  143.4, 143.3, 136.5, 136.5, 136.5, 129.7, 129.6, 129.1, 128.5, 127.1, 127.0, 126.5, 54.9, 46.4, 38.4, 21.5 ppm.

NMR data were in agreement with those reported.<sup>18</sup>

**Mp.:** 110 – 114 °C; **HRMS-ESI**  $m/z$  calculated for  $\text{C}_{23}\text{H}_{26}\text{N}_2\text{O}_4\text{S}_2$   $[\text{M}+\text{H}]^+$  459.1407, found 459.1406.

$[\alpha]_D^{25} = -68.9$  ( $c = 1.00$ ,  $\text{CHCl}_3$ ).

### (S)-N-(1-Azido-3-phenylpropan-2-yl)-4-methylbenzenesulfonamide (1l)

Alcohol **S3** (700 mg, 1 equiv., 2.29 mmol), DMAP (6 mg, 0.02 equiv., 45.84  $\mu\text{mol}$ ) and TsCl (481 mg, 1.1 equiv., 2.52 mmol) were dissolved in DCM (13 mL) under inert atmosphere. Then, TEA (0.4 mL, 1.1 equiv., 2.52 mmol) was added dropwise and the reaction was stirred at room temperature for 24 h. Later, the crude was washed with an aqueous HCl 0.4 M (3 x 10 mL) and brine (2 x 10 mL). The organic layer was dried over anhydrous  $\text{MgSO}_4$  and concentrated under reduced pressure. The residue was purified by flash chromatography eluting with Hex/EtOAc (8:2) to obtain the aziridine as a yellowish solid (535 mg, 81%).

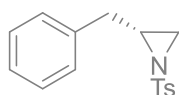

$^1\text{H}$  NMR (300 MHz,  $\text{CDCl}_3$ )  $\delta$  7.68 ( $\text{A}_2\text{X}_2$  part A,  $J_{AX} = 8.2$  Hz, 2H), 7.23 – 7.10 (m, 5H), 7.08 – 6.99 (m, 2H), 2.93 (tt,  $J = 7.0, 4.7$  Hz, 1H), 2.87 – 2.75 (m, 1H), 2.73 – 2.58 (m, 2H), 2.40 (s, 3H), 2.15 (d,  $J = 4.5$  Hz, 1H) ppm.  $^1\text{H}$  NMR data were in agreement with those

reported.<sup>19</sup>

Aziridine (300 mg, 1 equiv., 1.04 mmol) and  $\text{NaN}_3$  (102 mg, 1.5 equiv., 1.57 mmol) were suspended in acetonitrile (4.5 mL) and  $\text{H}_2\text{O}$  (0.5 mL). The reaction was stirred at reflux for 6 h. Then, acetonitrile was evaporated under reduced pressure and EtOAc (10 mL) and  $\text{H}_2\text{O}$  (10 mL) were added to the crude mixture. Layers were separated and the aqueous phase was extracted with EtOAc (3 x 10 mL). The combined organic layers were dried over anhydrous  $\text{MgSO}_4$  and concentrated under reduced pressure.

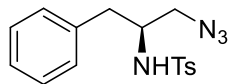

The residue was purified by flash chromatography eluting with Hex/EtOAc (8:2) to obtain the desired sulfonamide **1l** as a white solid (250 mg, 72%)

$^1\text{H}$  NMR (400 MHz,  $\text{CDCl}_3$ )  $\delta$  7.65 ( $\text{A}_2\text{X}_2$  part A,  $J_{AX} = 8.3$  Hz, 2H), 7.31 – 7.12 (m, 5H), 7.06 – 6.96 (m, 2H), 5.42 (d,  $J = 7.9$  Hz, 1H), 3.55 (dtd,  $J = 12.1, 7.6, 4.6$  Hz, 1H), 3.37 (dd,  $J = 12.4, 4.9$  Hz, 1H), 3.31 (dd,  $J = 12.4, 4.3$  Hz, 1H), 2.79 (dd,  $J = 13.8, 7.3$  Hz, 1H), 2.70 (dd,  $J = 13.8, 7.1$  Hz, 1H), 2.41 (s, 3H) ppm.

$^{13}\text{C}\{^1\text{H}\}$  NMR (101 MHz,  $\text{CDCl}_3$ )  $\delta$  143.4, 137.1, 136.3, 129.6, 129.1, 128.6, 126.8, 126.7, 54.5, 53.8, 38.4, 21.4 ppm.

NMR data were in agreement with those reported.<sup>20</sup>

**Mp.:** 40 – 44 °C; **HRMS-ESI**  $m/z$  calculated for  $\text{C}_{16}\text{H}_{18}\text{N}_4\text{O}_2\text{S}$   $[\text{M}+\text{H}]^+$  331.1223, found 331.1222.

$[\alpha]_D^{25} = -30.4$  ( $c = 0.92$ ,  $\text{CHCl}_3$ ).

<sup>18</sup> T. D. Montgomery and V. H. Rawal, *Org. Lett.*, 2016, **18**, 740.

<sup>19</sup> T. Ankner and G. Hilmersson, *Org. Lett.*, 2009, **11**, 503.

<sup>20</sup> S. Matsukawa, K. Tsukamoto, S. Yasuda and T. Harada, *Synthesis*, 2013, **45**, 2959.

**(S)-N-(-1-((*tert*-Butyldiphenylsilyl)oxy)-3-phenylpropan-2-yl)-4-methylbenzensulfonamide (1m)**

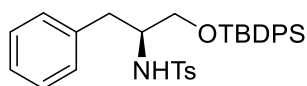

Alcohol **S3** (200 mg, 1 equiv., 0.65 mmol) and imidazole (94 mg, 2.1 equiv., 1.38 mmol) were dissolved in DCM (1.5 mL) under inert atmosphere. Then, TBDPSCl (0.2 mL, 1.15 equiv., 0.75 mmol) was added dropwise and the

reaction was stirred at room temperature for 24 h. The crude was washed with aqueous HCl 1 M (3 x 5 mL) and brine (2 x 5 mL). The organic layer was dried over MgSO<sub>4</sub> and purified by flash chromatography eluting with Hex/EtOAc (9:1) to obtain the protected alcohol **1m** as a colourless oil (300 mg, 84%)

**<sup>1</sup>H NMR** (400 MHz, CDCl<sub>3</sub>) δ 7.69 – 7.56 (m, 6H), 7.53 – 7.45 (m, 2H), 7.44 – 7.38 (m, 4H), 7.26 – 7.13 (m, 5H), 7.11 – 7.00 (m, 2H), 5.02 (d, *J* = 7.3 Hz, 1H), 3.66 – 3.59 (m, 1H), 3.52 (m, 2H), 2.99 (dd, *J* = 13.7, 7.0 Hz, 1H), 2.92 (dd, *J* = 13.7, 5.9 Hz, 1H), 2.42 (s, 3H), 1.13 (s, 9H) ppm.

**<sup>13</sup>C{<sup>1</sup>H} NMR** (101 MHz, CDCl<sub>3</sub>) δ 143.0, 137.6, 137.2, 135.6, 135.6, 132.9, 132.9, 129.9, 129.6, 129.4, 128.5, 127.8, 126.9, 126.5, 64.1, 56.2, 38.1, 27.0, 21.5, 19.3 ppm.

**HRMS-ESI** *m/z* calculated for C<sub>32</sub>H<sub>37</sub>NO<sub>3</sub>SSi [*M*+*H*]<sup>+</sup> 544.2336, found 544.2346.

[α]<sub>D</sub><sup>25</sup> = -14.8 (*c* = 1.00, CHCl<sub>3</sub>).

**(S)-2-((4-Methylphenyl)sulfonamido)-3-phenylpropyl acetate (1n)**

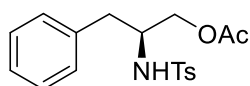

Alcohol **S3** (494 mg, 1 equiv., 1.62 mmol) and DMAP (4 mg, 0.02 equiv., 32.35 μmol) were dissolved in DCM (6.0 mL) under inert atmosphere. Then, acetyl chloride (0.1 mL, 1 equiv., 1.62 mmol) and TEA (0.4 mL, 2 equiv., 3.24 mmol) were

added dropwise. The reaction was stirred at room temperature for 24 h. Upon completion of the reaction, the crude mixture was washed with H<sub>2</sub>O (3 x 10 mL) and brine (2 x 10 mL), dried over anhydrous MgSO<sub>4</sub> and concentrated under reduced pressure. The residue was purified by flash chromatography eluting with Hex/EtOAc (7:3) to obtain the acetylated compound **1n** as a yellowish oil (430 mg, 76%).

**<sup>1</sup>H NMR** (400 MHz, CDCl<sub>3</sub>) δ 7.64 (A<sub>2</sub>X<sub>2</sub> part A, *J*<sub>AX</sub> = 8.3 Hz, 2H), 7.24 – 7.08 (m, 5H), 7.13 – 6.91 (m, 2H), 5.05 (d, *J* = 8.1 Hz, 1H), 3.97 (dd, *J* = 11.5, 5.5 Hz, 1H), 3.93 (dd, *J* = 11.5, 4.6 Hz, 1H), 3.68 (dtdd, *J* = 8.1, 7.0, 5.5, 4.6 Hz, 1H), 2.78 (d, *J* = 7.0 Hz, 2H), 2.40 (s, 3H), 1.96 (s, 3H) ppm.

**<sup>13</sup>C{<sup>1</sup>H} NMR** (101 MHz, CDCl<sub>3</sub>) δ 170.9, 143.4, 137.6, 136.4, 129.8, 129.3, 128.8, 127.0, 126.9, 65.0, 53.9, 38.7, 21.6, 20.8 ppm.

NMR data were in agreement with those reported.<sup>21</sup>

**HRMS-ESI** *m/z* calculated for C<sub>18</sub>H<sub>21</sub>NO<sub>4</sub>S [*M*+*H*]<sup>+</sup> 348.1264, found 348.1263.

[α]<sub>D</sub><sup>25</sup> = -5.8 (*c* = 1.00, CHCl<sub>3</sub>).

**(S)-N-(1-Bromo-3-phenylpropan-2-yl)-4-methylbenzensulfonamide (1o)**

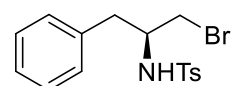

Alcohol **S3** (1 g, 1 equiv., 3.27 mmol) was dissolved in DCM (50 mL) under inert atmosphere. Then, at 0 °C, CBr<sub>4</sub> (1.30 g, 1.2 equiv., 3.93 mmol) and PPh<sub>3</sub> (1.03 g, 1.2 equiv., 3.93 mmol) were added in portions. The reaction was stirred at room

temperature for 24 h. Then, the reaction was concentrated under reduced pressure and purified by flash

<sup>21</sup> S. K. Manna and G. Panda, *RSC Adv.*, 2013, **3**, 18332.

chromatography eluting with Hex/EtOAc (7:3) to obtain the brominated compound **1o** as a white solid (1.04 g, 86%).

**<sup>1</sup>H NMR** (400 MHz, CDCl<sub>3</sub>) δ 7.64 (A<sub>2</sub>X<sub>2</sub>, part A, *J*<sub>AX</sub> = 8.4 Hz, 2H), 7.27 – 7.15 (m, 5H), 7.09 – 7.02 (m, 2H), 4.93 (d, *J* = 8.4 Hz, 1H), 3.63 (ttdd, *J* = 8.4, 6.4, 4.8, 3.4 Hz, 1H), 3.39 – 3.30 (m, 2H), 2.88 (dd, *J* = 13.7, 7.7 Hz, 1H), 2.77 (dd, *J* = 13.7, 6.4 Hz, 1H), 2.42 (s, 3H) ppm.

**<sup>13</sup>C{<sup>1</sup>H} NMR** (101 MHz, CDCl<sub>3</sub>) δ 143.7, 137.3, 136.2, 129.9, 129.3, 128.9, 127.1, 127.1, 54.7, 39.3, 37.1, 21.7 ppm.

NMR data were in agreement with those reported.<sup>21</sup>

**Mp.:** 95 – 98 °C; **HRMS-ESI** *m/z* calculated for C<sub>16</sub>H<sub>18</sub>BrNO<sub>2</sub>S [M+H]<sup>+</sup> 368.0314/370.0295, found 368.0313/370.0293.

[α]<sub>D</sub><sup>25</sup> = -11.1 (*c* = 1.00, CHCl<sub>3</sub>).

**(S)-N-(1-(1,1-Dioxo-3-oxobenzo[d]isothiazol-2(3H)-yl)-3-phenylpropan-2-yl)-4-methylbenzensulfonamide (1p)**

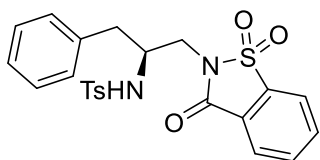

Alcohol **S3** (480 mg, 1 equiv., 1.57 mmol), PPh<sub>3</sub> (824 mg, 2 equiv., 3.14 mmol) and saccharine (576 mg, 2 equiv., 3.14 mmol) were dissolved in THF (8.0 mL) under inert atmosphere. Then, at 0 °C, DIAD (0.5 mL, 1.6 equiv., 2.51 mmol) was added dropwise. The reaction was stirred at room temperature for 24 h. The crude was washed with H<sub>2</sub>O (3 x 15 mL) and brine

(2 x 15 mL). The organic layer was dried over anhydrous MgSO<sub>4</sub>, concentrated under reduced pressure and purified by flash chromatography eluting with Hex/EtOAc (1:1) to obtain the compound **1p** as a white solid (140 mg, 19%)

**<sup>1</sup>H NMR** (400 MHz, CDCl<sub>3</sub>) δ 7.95 – 7.77 (m, 4H), 7.54 (A<sub>2</sub>X<sub>2</sub>, part A, *J*<sub>AX</sub> = 8.3 Hz, 2H), 7.32 – 7.22 (m, 3H), 7.19 – 7.11 (m, 2H), 6.87 (A<sub>2</sub>X<sub>2</sub>, part X, *J*<sub>XA</sub> = 8.3 Hz, 2H), 4.96 (d, *J* = 7.6 Hz, 1H), 4.08 – 3.95 (m, 1H), 3.71 – 3.66 (m, 2H), 2.96 (d, *J* = 6.3 Hz, 2H), 2.13 (s, 3H) ppm.

**<sup>13</sup>C{<sup>1</sup>H} NMR** (101 MHz, CDCl<sub>3</sub>) δ 159.3, 142.8, 137.3, 137.1, 135.7, 135.0, 134.4, 129.6, 129.3, 128.9, 127.2, 127.0, 125.3, 121.1, 53.6, 42.2, 40.5, 21.6 ppm.

**Mp.:** 117 – 121 °C; **HRMS-ESI** *m/z* calculated for C<sub>23</sub>H<sub>22</sub>N<sub>2</sub>O<sub>5</sub>S<sub>2</sub> [M+H]<sup>+</sup> 471.1043, found 471.1037.

[α]<sub>D</sub><sup>25</sup> = +16.8 (*c* = 0.98, CHCl<sub>3</sub>).

**(S)-2-((4-Methylphenyl)sulfonamido)-3-phenylpropyl (S)-2-(4-isobutylphenyl)propanoate (1q)**

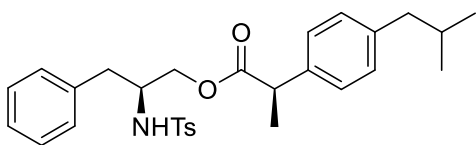

Alcohol **S3** (500 mg, 1 equiv., 1.64 mmol) and (S)-ibuprofen (372 mg, 1.1 equiv., 1.80 mmol) were dissolved in DCM (12 mL) under inert atmosphere. Then, at 0 °C, DCC (372 mg, 1.1 equiv., 1.80 mmol) and DMAP (60 mg, 0.3 equiv., 0.49 mmol)

were added in portions and the reaction was stirred at room temperature for 24 h. The crude was filtered off using a filter plate eluting with DCM (3 x 10 mL). The combined organic layers were washed with aqueous HCl 1 M (3 x 15 mL), aqueous NaHCO<sub>3</sub> 5% m/m (3 x 20 mL) and brine (2 x 20 mL), dried over anhydrous MgSO<sub>4</sub> and concentrated under reduced pressure. The residue was purified by flash chromatography eluting with Hex/EtOAc (8:2) to obtain the ester **1q** as a colourless oil (410 mg, 51%).

**<sup>1</sup>H NMR** (400 MHz, CDCl<sub>3</sub>) δ 7.65 (A<sub>2</sub>X<sub>2</sub>, part A, *J*<sub>AX</sub> = 8.4 Hz, 2H), 7.25 – 7.17 (m, 4H), 7.15 – 7.07 (m, 5H), 6.82 – 6.66 (m, 2H), 5.11 (d, *J* = 8.4 Hz, 1H), 3.87 (d, *J* = 4.1 Hz, 2H), 3.68 (q, *J* = 7.1 Hz, 1H), 3.66 – 3.55 (m, 1H), 2.60 – 2.48 (m, 2H), 2.45 (d, *J* = 7.2 Hz, 2H), 2.41 (s, 3H), 1.92 – 1.76 (m, 1H), 1.47 (d, *J* = 7.2 Hz, 3H), 0.88 (d, *J* = 2.3 Hz, 3H), 0.87 (d, *J* = 2.3 Hz, 3H) ppm.

**<sup>13</sup>C{<sup>1</sup>H} NMR** (101 MHz, CDCl<sub>3</sub>) δ 174.3, 143.4, 140.9, 137.7, 137.6, 136.4, 129.8, 129.5, 129.2, 128.6, 127.3, 127.0, 126.7, 64.6, 53.9, 45.1, 44.9, 38.1, 30.3, 22.5, 22.4, 21.6, 17.9 ppm.

**HRMS-ESI** *m/z* calculated for C<sub>29</sub>H<sub>35</sub>NO<sub>4</sub>S [M+H]<sup>+</sup> 494.2360, found 494.2355.

[α]<sub>D</sub><sup>25</sup> = +29.7 (c = 0.95, CHCl<sub>3</sub>).

### Ethyl-2-methyl-2-(4-methylphenylsulfonamido)-3-phenylpropanoate (1r)

This compound was synthesized according to the literature procedure.<sup>22</sup>

L-Phenylalanine ethyl ester hydrochloride (2.00 g, 1.0 equiv., 8.71 mmol), was suspended in DCM (20 mL) under inert atmosphere. TEA (1.5 mL, 1.2 equiv., 10.45 mmol) was added dropwise and the reaction mixture was stirred at room temperature for 30 minutes. Then, benzaldehyde (0.9 mL, 1 equiv., 8.71 mmol) and anhydrous MgSO<sub>4</sub> (1.05 g, 1 equiv., 8.71 mmol) were added consecutively and the reaction was stirred at room temperature for 24 h. The solvent was evaporated, and the crude was dissolved in EtOAc (15 mL) and filtered in a pad of Celite®. The resulting organic layer was washed with H<sub>2</sub>O (2 x 15 mL) and brine (2 x 15 mL) and dried over anhydrous MgSO<sub>4</sub> to obtain the desired imine as an orange liquid (2.45 g, quant) that was used without further purification.

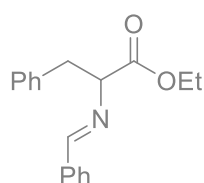

**<sup>1</sup>H NMR** (300 MHz, CDCl<sub>3</sub>) δ 8.00 (s, 1H), 7.81 – 7.71 (m, 2H), 7.53 – 7.41 (m, 3H), 7.35 – 7.21 (m, 5H), 4.33 – 4.17 (m, 3H), 3.42 (dd, *J* = 13.6, 3.4 Hz, 1H), 3.20 (dd, *J* = 13.6, 6.8 Hz, 1H), 1.31 (t, *J* = 7.0 Hz, 3H) ppm. <sup>1</sup>H NMR data were in agreement with those reported.<sup>23</sup>

A solution of NaHMDS (1 M) in THF (3.1 mL, 1.1 equiv., 3.09 mmol), and imine (791 mg, 1 equiv., 2.81 mmol) were added in THF (20 mL) under inert atmosphere at 0 °C. The mixture was stirred for 45 minutes. Then, iodomethane (0.2 mL, 1.4 equiv., 3.94 mmol) was added dropwise and the reaction mixture was stirred at room temperature for 24 h. The solvent was removed under reduced pressure and the crude was redissolved in EtOAc (15 mL), washed with H<sub>2</sub>O (2 x 15 mL), brine (2 x 15 mL) and dried over anhydrous MgSO<sub>4</sub>. Finally, the crude was concentrated under reduced pressure to obtain the desired α-methyl imine as a bright yellow liquid (831 mg, quant) that was used without further purification.

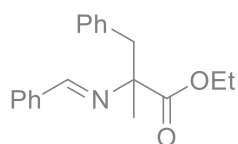

**<sup>1</sup>H NMR** (300 MHz, CDCl<sub>3</sub>) δ 8.09 (s, 1H), 7.80 – 7.69 (m, 2H), 7.47 – 7.37 (m, 3H), 7.24 – 7.18 (m, 5H), 4.21 (q, *J* = 7.1 Hz, 2H), 3.27 (s, 2H), 1.43 (s, 3H), 1.27 (t, *J* = 7.1 Hz, 3H) ppm.

In a round bottom flask, α-methyl imine (798 mg, 1 equiv., 2.70 mmol) was dissolved in THF (2.5 mL). Then, aqueous HCl 3M (1.75 mL) was added and the reaction mixture was stirred at room temperature for 1 h. The solvent was removed under reduced pressure and the aqueous phase was washed with EtOAc (3 x 2 mL). An aqueous solution NaOH 10 M was added until pH = 10 was reached. Then, this basified aqueous layer was extracted with DCM (3 x 5 mL). The organic layer was dried over anhydrous MgSO<sub>4</sub> and concentrated under reduced pressure to obtain the amine as a yellowish oil (358 mg, 64%).

<sup>22</sup> R. Liu, Y. Wu, Q. Li, W. Liao, S.-H. Chen, G. Li, J. M. Betancort, D. T. Winn and D. A. Campbell, *Tetrahedron*, 2008, **64**, 4363.

<sup>23</sup> A. Calcagni, D. Rossi and G. Lucente, *Synthesis*, 1981, 445.

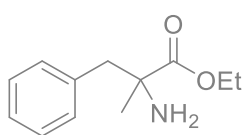

**<sup>1</sup>H NMR** (300 MHz, CDCl<sub>3</sub>) δ 7.34 – 7.22 (m, 2H), 7.21 – 7.11 (m, 3H), 4.20 – 4.11 (m, 2H), 3.13 (d, *J* = 13.1 Hz, 1H), 2.80 (d, *J* = 13.1 Hz, 1H), 1.54 (s, 2H), 1.39 (s, 3H), 1.26 (t, *J* = 7.1 Hz, 3H) ppm. <sup>1</sup>H NMR data were in agreement with those reported.<sup>24</sup>

Amine (358 mg, 1.0 equiv., 1.73 mmol), DMAP (4 mg, 0.02 equiv., 34.55 μmol) and

TsCl (362 mg, 1.1 equiv., 1.90 mmol) were dissolved in DCM (9 mL) under inert atmosphere. TEA (0.3 mL, 1.2 equiv., 2.07 mmol) was added dropwise and the reaction mixture was stirred at room temperature for 24 h. The crude mixture was then washed with an aqueous saturated NH<sub>4</sub>Cl solution (4

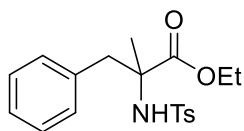

x 10 mL) and brine (2 x 10 mL) and dried over anhydrous MgSO<sub>4</sub>. The solvent was removed under reduced pressure and the crude was purified by flash chromatography eluting with Hex/EtOAc (8:2) to yield compound **1r** as a white solid (534 mg, 86%).

**<sup>1</sup>H NMR** (400 MHz, CDCl<sub>3</sub>) δ 7.73 (A<sub>2</sub>X<sub>2</sub> part A, *J*<sub>AX</sub> = 8.3 Hz, 2H), 7.35 – 7.21 (m, 5H), 7.21 – 7.07 (m, 2H), 5.30 (s, 1H), 4.05 (ABX<sub>3</sub>, part AB, *J*<sub>AB</sub> = 7.2 Hz, *J*<sub>AX</sub> = 3.4 Hz, 2H), 3.22 (d, *J* = 13.5 Hz, 1H), 3.02 (d, *J* = 13.5 Hz, 1H), 2.40 (s, 3H, CH<sub>3</sub>Ar), 1.45 (s, 3H), 1.18 (ABX<sub>3</sub> part X, *J*<sub>AX</sub> = *J*<sub>BX</sub> = 7.2 Hz, 3H) ppm

**<sup>13</sup>C{<sup>1</sup>H} NMR** (101 MHz, CDCl<sub>3</sub>) δ 172.8, 143.3, 140.0, 135.1, 130.4, 129.6, 128.5, 127.5, 127.1, 63.2, 62.1, 46.7, 22.0, 21.6, 14.1 ppm.

**Mp.**: 72 – 75 °C; **HRMS-ESI** *m/z* calculated for C<sub>19</sub>H<sub>23</sub>NO<sub>4</sub>S [M+H]<sup>+</sup> 362.1421, found 362.1422.

### (S)-Ethyl-2-(N,4-Dimethylphenylsulfonamido)-3-phenylpropanoate (**1s**)

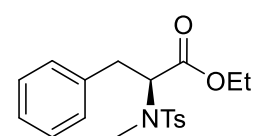

Sulfonamide **1a** (300 mg, 1 equiv., 0.86 mmol) and K<sub>2</sub>CO<sub>3</sub> (239 mg, 2 equiv., 1.73 mmol) were suspended in DMF (5.0 mL) under inert atmosphere. Iodomethane (64 μL, 1.2 equiv., 1.04 mmol) was added dropwise and the reaction mixture was stirred at room temperature for 16 h. Then, aqueous HCl 0.2 M (10 mL) was added

to the crude mixture and was extracted with Et<sub>2</sub>O (4 x 10 mL). This organic layer was washed with H<sub>2</sub>O (2 x 15 mL) and brine (2 x 15 mL) and dried over anhydrous MgSO<sub>4</sub>. The solvent was removed under reduced pressure and the crude was purified by flash chromatography eluting with Hex/EtOAc (7:3) to yield compound **1s** as a yellowish liquid (256 mg, 82%).

**<sup>1</sup>H NMR** (400 MHz, CDCl<sub>3</sub>) δ 7.48 (A<sub>2</sub>X<sub>2</sub> part A, *J*<sub>AX</sub> = 8.2 Hz, 2H), 7.32 – 7.21 (m, 3H), 7.22 – 7.15 (m, 4H), 4.93 (dd, *J* = 8.6, 7.1 Hz, 1H), 3.98 (AB de ABX<sub>3</sub>, *J*<sub>AB</sub> = 2.1 Hz, *J*<sub>AX</sub> = *J*<sub>BX</sub> = 7.2 Hz, 2H), 3.24 (dd, *J* = 14.0, 7.1 Hz, 1H), 2.88 (dd, *J* = 14.0, 8.6 Hz, 1H), 2.86 (s, 3H), 2.39 (s, 3H), 1.09 (X de ABX<sub>3</sub>, *J*<sub>AX</sub> = *J*<sub>BX</sub> = 7.2 Hz, 3H) ppm.

**<sup>13</sup>C{<sup>1</sup>H} NMR** (101 MHz, CDCl<sub>3</sub>) δ 170.3, 143.3, 136.6, 136.3, 129.5, 129.3, 128.8, 127.6, 127.0, 61.3, 60.5, 36.0, 30.2, 21.6, 14.0 ppm.

**HRMS-ESI** *m/z* calculated for C<sub>19</sub>H<sub>23</sub>NO<sub>4</sub>S [M+H]<sup>+</sup> 362.1421, found 362.1419.

[α]<sub>D</sub><sup>25</sup> = -23.1 (c = 0.98, CHCl<sub>3</sub>).

<sup>24</sup> K. Ishihara, H. Hamamoto, M. Matsugi and T. Shioiri, *Tetrahedron Lett.*, 2015, **56**, 3169.



### Ethyl-2-(4-methylsulfonamido)pent-4-enoate (**1t**)

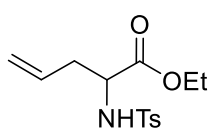

Acetyl chloride (2.2 mL, 31.27 mmol) was added dropwise to a round bottom flask containing EtOH (50 mL) at 0 °C. The mixture was stirred for 15 minutes. Then, 2-aminopentenoic acid (1.50 g, 13.03 mmol) was added and the reaction was stirred at reflux for 24 h. The solvent was removed under reduced pressure to yield the

corresponding ester as an orange liquid (2.34 g, quant) that was used without further purification. The ethyl ester (2.00 g, 1.0 equiv., 11.13 mmol), DMAP (27 mg, 0.02 equiv., 0.22 mmol) and TsCl (2.33 g, 1.1 equiv., 12.25 mmol) were dissolved in DCM (33 mL) under inert atmosphere. TEA (3.1 mL, 2 equiv., 22.27 mmol) was added dropwise and the reaction mixture was stirred at room temperature for 24 h. The crude mixture was then washed with an aqueous saturated NH<sub>4</sub>Cl solution (3 x 20 mL) and brine (2 x 20 mL) and dried over anhydrous MgSO<sub>4</sub>. The solvent was removed under reduced pressure and the residue was purified by flash chromatography eluting with Hex/EtOAc (7:3) to yield compound **1t** as a white solid (2.91 g, 88%)

**<sup>1</sup>H NMR** (400 MHz, CDCl<sub>3</sub>) δ 7.73 (A<sub>2</sub>X<sub>2</sub> part A, *J*<sub>AX</sub> = 8.1 Hz, 2H), 7.28 (A<sub>2</sub>X<sub>2</sub> part A, *J*<sub>XA</sub> = 8.1 Hz, 2H), 5.64 (ddt, *J* = 17.3, 10.3, 7.1 Hz, 1H), 5.18 – 5.02 (m, 3H), 4.05 – 3.90 (m, 3H), 2.47 (ddd, *J* = 7.1, 5.8, 1.2 Hz, 2H), 2.41 (s, 3H), 1.12 (t, *J* = 7.2 Hz, 3H) ppm.

**<sup>13</sup>C{<sup>1</sup>H} NMR** (101 MHz, CDCl<sub>3</sub>) δ 171.0, 143.8, 137.0, 131.4, 129.8, 127.4, 119.9, 61.9, 55.3, 37.8, 21.7, 14.1 ppm.

NMR data were in agreement with those reported.<sup>25</sup>

**Mp.**: 45 – 47°C; **HRMS-ESI** *m/z* calculated for C<sub>14</sub>H<sub>19</sub>NO<sub>4</sub>S [M+H]<sup>+</sup> 298.1108, found 298.1109.

### Methyl (S)-3,3-dimethyl-2-((4-methylphenyl)sulfonamido)butanoate (**1u**)

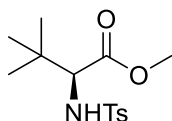

L-*tert*-Leucine methyl ester hydrochloride (500 mg, 1.0 equiv., 2.75 mmol), DMAP (7 mg, 0.02 equiv., 55.05 μmol) and TsCl (577 mg, 1.1 equiv., 3.03 mmol) were dissolved in DCM (16 mL) under inert atmosphere. TEA (0.8 mL, 2.1 equiv., 5.78 mmol) was added dropwise and the reaction mixture was stirred at room temperature for 24 h. The crude

mixture was then washed with an aqueous HCl 1M solution (3 x 15 mL) and brine (2 x 15 mL) and dried over anhydrous MgSO<sub>4</sub>. The solvent was removed under reduced pressure and the residue was purified by flash chromatography eluting with Hex/EtOAc (8:2) to yield compound **1u** as a white solid (741 mg, 90%).

**<sup>1</sup>H NMR** (400 MHz, CDCl<sub>3</sub>) δ 7.69 (A<sub>2</sub>X<sub>2</sub>, part A, *J*<sub>AX</sub> = 8.3 Hz, 2H), 7.27 (A<sub>2</sub>X<sub>2</sub>, part X, *J*<sub>XA</sub> = 8.3 Hz, 2H), 5.10 (d, *J* = 10.8 Hz, 1H), 3.56 (d, *J* = 10.8 Hz, 1H), 3.33 (s, 3H), 2.41 (s, 3H), 0.94 (s, 9H) ppm.

**<sup>13</sup>C{<sup>1</sup>H} NMR** (101 MHz, CDCl<sub>3</sub>) δ 171.5, 143.7, 136.5, 129.6, 127.6, 64.3, 51.8, 34.7, 26.4, 21.6 ppm.

**Mp.**: 110 – 113 °C; **HRMS-ESI** *m/z* calculated for C<sub>14</sub>H<sub>21</sub>NO<sub>4</sub>S [M+H]<sup>+</sup> 300.1264, found 300.1262.

[α]<sub>D</sub><sup>25</sup> = +27.0 (c = 0.96, CHCl<sub>3</sub>).

<sup>25</sup> T. Miura, T. Tanaka, T. Biyajima, A. Yada and M. Murakami, *Angew Chem Int Ed*, 2013, **52**, 3883.

### Ethyl-2-(4-methylsulfonilamide) acetate (1v)

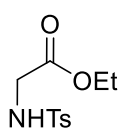

Glycine ethyl ester hydrochloride (1.00 g, 1.0 equiv., 7.16 mmol), DMAP (18 mg, 0.02 equiv., 0.14 mmol) and TsCl (1.50 g, 1.1 equiv., 7.88 mmol) were dissolved in DCM (10 mL) under inert atmosphere. TEA (2.0 mL, 2 equiv., 14.33 mmol) was added dropwise and the reaction mixture was stirred at room temperature for 24 h. The crude mixture was then washed with an aqueous  $\text{NH}_4\text{Cl}$  saturated solution (4 x 15 mL) and brine (2 x 15 mL) and dried over anhydrous  $\text{MgSO}_4$ . The solvent was removed under reduced pressure and the residue was purified by flash chromatography eluting with Hex/EtOAc (6:4) to yield compound **1v** as a white solid (1.20 g, 65%).

**$^1\text{H}$  NMR** (400 MHz,  $\text{CDCl}_3$ )  $\delta$  7.75 (d,  $J$  = 8.1 Hz, 2H), 7.30 (d,  $J$  = 8.1, 2H), 5.05 (bs, 1H), 4.08 (dd,  $J$  = 7.2 Hz, 2H), 3.76 (s, 2H), 2.42 (s, 3H), 1.18 (t,  $J$  = 7.2 Hz, 3H) ppm.

**$^{13}\text{C}\{^1\text{H}\}$  NMR** (101 MHz,  $\text{CDCl}_3$ )  $\delta$  168.9, 144.0, 136.3, 129.9, 127.4, 62.0, 44.3, 27.1, 14.1 ppm.

NMR data were in agreement with those reported.<sup>26</sup>

**Mp.:** 57 – 60 °C; **HRMS-ESI**  $m/z$  calculated for  $\text{C}_{11}\text{H}_{15}\text{NO}_4\text{S}$   $[\text{M}+\text{H}]^+$  258.0795, found 258.0796

### Ethyl 2-((4-methylphenyl)sulfonamido)-2-phenylacetate (1w)

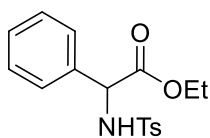

This compound was synthesized according to the literature procedure.<sup>27</sup>

Dichloro(*p*-cymene)ruthenium(II)dimer (5 mg, 0.01 eq, 7.89  $\mu\text{mol}$ ) was dissolved in DCM (18 mL) under inert atmosphere. Then, ethyl 2-diazo-phenylacetate (150 mg, 1 eq, 0.79 mmol) and *p*-tosylamide (135 mg, 1 eq, 0.79 mmol) were added in portions.

The reaction was stirred at room temperature for 30 min. The crude was concentrated under reduced pressure and the residue was purified by flash chromatography eluting with hexane/EtOAc (7:3) to obtain sulfonamide **1w** as a white solid (140 mg, 53 %).

**$^1\text{H}$  NMR** (400 MHz,  $\text{CDCl}_3$ )  $\delta$  7.56 (d,  $J$  = 8.2 Hz, 2H), 7.20 – 7.15 (m, 5H), 7.13 (d,  $J$  = 8.2 Hz, 2H), 5.60 (bs, 1H), 4.97 (d,  $J$  = 8.1 Hz, 1H), 4.10 – 3.71 (m, 2H), 2.31 (s, 3H), 1.02 (t,  $J$  = 7.1 Hz, 3H) ppm.

**$^{13}\text{C}\{^1\text{H}\}$  NMR** (101 MHz,  $\text{CDCl}_3$ )  $\delta$  170.2, 143.6, 137.1, 135.5, 129.6, 128.9, 128.6, 127.3, 127.2, 62.4, 59.5, 21.6, 14.0 ppm.

NMR data were in agreement with those reported.<sup>28</sup>

### *N*-(1,2-Diphenylethyl)-4-methylbenzensulfonamide (1x)

2-Phenylacetophenone (817 mg, 1 equiv., 4.08 mmol) was dissolved in MeOH (13 mL) under inert atmosphere. Then,  $\text{NH}_4\text{OAc}$  (2.83 g, 9 equiv., 36.72 mmol) and  $\text{NaBH}_3\text{CN}$  (513 mg, 2 equiv., 8.16 mmol) were added in portions and the mixture was stirred at room temperature for 24 h. Later, the crude was acidified with aqueous HCl 4 M until pH = 2-3 was reached and washed with DCM (3 x 20 mL). Then, the aqueous layer was basified with aqueous NaOH 10 M until pH = 10-12 was reached and extracted with DCM (3 x 20 mL). This organic layer was dried over anhydrous  $\text{MgSO}_4$  and concentrated under reduced pressure to obtain the amine as a colourless oil (282 mg, 35%).

<sup>26</sup> R. Takai, D. Shimbo, N. Tada and A. Itoh, *J. Org. Chem.*, 2021, **86**, 4699.

<sup>27</sup> Q.-H. Deng, H.-W. Xu, A. W.-H. Yuen, Z.-J. Xu and C.-M. Che, *Org. Lett.*, 2008, **10**, 1529.

<sup>28</sup> S. P. Fritz, J. F. Moya, M. G. Unthank, E. M. McGarrigle and V. K. Aggarwal, *Synthesis*, 2012, **44**, 1584.

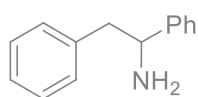

**<sup>1</sup>H NMR** (300 MHz, CDCl<sub>3</sub>) δ 7.43–6.99 (m, 10H), 4.15–4.03 (m, 1H), 2.92 (dd, *J* = 13.5, 4.4 Hz, 1H), 2.80–2.67 (m, 2H), 1.41 (bs, 2H) ppm. <sup>1</sup>H NMR data were in agreement with those reported.<sup>29</sup>

Amine (282 mg, 1 equiv., 1.43 mmol), DMAP (3 mg, 0.02 equiv., 28.59 μmol) and TsCl (327 mg, 1.2 equiv., 1.72 mmol) were dissolved with DCM (8 mL) under inert atmosphere. Then, TEA (0.2 mL, 1.2 equiv., 1.72 mmol) was added dropwise and the reaction was stirred at room temperature for 24 h. Later, the crude was washed with aqueous HCl 0.4 M (3 x 10 mL) and brine (2 x 10 mL). The organic layer was dried over

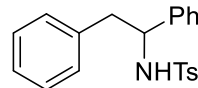

anhydrous MgSO<sub>4</sub> and concentrated under reduced pressure. The crude was then purified by flash chromatography eluting with Hex/EtOAc (8:2) to obtain sulfonamide **1x** as a white solid (147 mg, 29%).

**<sup>1</sup>H NMR** (400 MHz, CDCl<sub>3</sub>) δ 7.43 (A<sub>2</sub>X<sub>2</sub> part A, *J*<sub>AX</sub> = 8.3 Hz, 2H), 7.19–7.15 (m, 6H), 7.11–7.07 (m, 2H), 7.06–7.02 (m, 2H), 6.94–6.88 (m, 2H), 4.82 (d, *J* = 6.1 Hz, 1H), 4.51 (q<sub>app</sub>, *J* = 6.8 Hz, 1H), 2.99 (ABX part AB, *J*<sub>AB</sub> = 13.8, *J*<sub>AX</sub> = 6.8, *J*<sub>BX</sub> = 7.4 Hz 1H), 2.36 (s, 3H) ppm.

**<sup>13</sup>C{<sup>1</sup>H} NMR** (101 MHz, CDCl<sub>3</sub>) δ 143.1, 140.5, 137.2, 136.4, 129.5, 128.7, 128.5, 127.6, 127.2, 127.0, 126.9, 59.3, 44.2, 21.6 ppm.

**Mp.**: 106–110 °C; **HRMS-ESI** *m/z* calculated for C<sub>21</sub>H<sub>21</sub>NO<sub>2</sub>S [M+H]<sup>+</sup> 352.1366, found 352.1366.

#### 4-Methyl-*N*-(3-oxo-1-phenylbutan-2-yl)benzensulfonamide (**S4**)

This compound was synthesized according to the literature procedure.<sup>30</sup>

L-Phe (1.5 g, 1 equiv., 9.08 mmol), anhydrous pyridine (7.3 mL, 10 equiv., 90.81 mmol) and acetic anhydride (3.0 mL, 3.5 equiv., 31.78 mmol) were added in a round bottom flask under inert atmosphere. The reaction was stirred at reflux for 24 h. Then, the crude was concentrated under reduced pressure, redissolved in DCM (15 mL) and washed with an aqueous saturated NaHCO<sub>3</sub> solution (3 x 15 mL) and brine (2 x 15 mL). The organic layer was dried over anhydrous MgSO<sub>4</sub>, concentrated under reduced pressure and purified by flash chromatography eluting with Hex/EtOAc (4:6) to obtain the amide as a yellow solid (1.73 g, 73%).

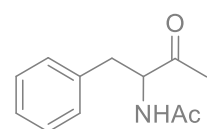

**<sup>1</sup>H NMR** (300 MHz, CDCl<sub>3</sub>) δ 7.35–7.21 (m, 3H), 7.15–7.09 (m, 2H), 6.07 (s, 1H), 4.87 (q, *J* = 6.6 Hz, 1H), 3.14 (dd, *J* = 14.0, 6.8 Hz, 1H), 3.06 (dd, *J* = 14.0, 5.7 Hz, 1H), 2.16 (s, 3H), 1.98 (s, 3H) ppm. <sup>1</sup>H NMR data were in agreement with those reported.<sup>31</sup>

In a round bottom flask, amide (500 mg, 1 equiv., 2.44 mmol) was dissolved in EtOH (7.3 mL) and aqueous HCl 6 M (13.4 mL). The reaction was stirred at reflux for 24 h. Then, the reaction was concentrated under reduced pressure and redissolved in EtOH (3.5 mL). Later, Et<sub>2</sub>O (40 mL) was poured and the precipitate was filtered off and washed with Et<sub>2</sub>O to obtain the desired hydrochloride as a greenish solid (360 mg, 74%).

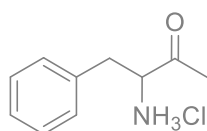

**<sup>1</sup>H NMR** (300 MHz, CD<sub>3</sub>OD) δ 7.48–7.18 (m, 5H), 4.44 (dd, *J* = 8.6, 5.9 Hz, 1H), 3.40–3.32 (m, 1H), 3.01 (dd, *J* = 14.5, 8.6 Hz, 1H), 2.23 (s, 3H) ppm.

<sup>29</sup> Y. Yamashita, H. Suzuki, I. Sato, T. Hirata and S. Kobayashi, *Angew. Chem. Int. Ed.*, 2018, **57**, 6896.

<sup>30</sup> C. Yuan and D. Chen, *Synthesis*, 1992, 531.

<sup>31</sup> R. C. Wende, A. Seitz, D. Niedeck, S. M. M. Schuler, C. Hofmann, J. Becker and P. R. Schreiner, *Angew. Chem. Int. Ed.*, 2016, **55**, 2719.

Hydrochloride (360 mg, 1 equiv., 1.80 mmol), DMAP (4 mg, 0.02 equiv., 36.06  $\mu$ mol) and TsCl (412 mg, 1.2 equiv., 2.16 mmol) were dissolved with DCM (10 mL) under inert atmosphere. Then, TEA (0.5 mL, 2 equiv., 3.61 mmol) was added dropwise and the reaction was stirred at room temperature for 24 h. Later, the crude was washed with aqueous HCl 0.4 M (3 x 10 mL) and brine (2 x 10 mL). The organic layer

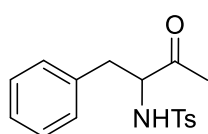

was dried over anhydrous  $\text{MgSO}_4$  and concentrated under reduced pressure. The crude was then purified by flash chromatography eluting with Hex/EtOAc (7:3) to obtain sulfonamide **S4** as a white solid (286 mg, 50%).

**$^1\text{H}$  NMR** (400 MHz,  $\text{CDCl}_3$ )  $\delta$  7.58 (d,  $J$  = 8.2 Hz, 2H), 7.25 – 7.18 (m, 5H), 7.08 – 6.99 (m, 2H), 5.27 (d,  $J$  = 6.4 Hz, 1H), 4.10 (q,  $J$  = 6.4 Hz, 1H), 2.99 (dd,  $J$  = 14.1, 6.4 Hz, 1H), 2.92 (dd,  $J$  = 14.1, 6.5 Hz, 1H), 2.40 (s, 3H), 2.03 (s, 3H) ppm.

**$^{13}\text{C}\{^1\text{H}\}$  NMR** (101 MHz,  $\text{CDCl}_3$ )  $\delta$  206.0, 143.8, 136.7, 135.1, 129.8, 129.4, 128.9, 127.4, 127.2, 62.8, 38.4, 27.7, 21.7 ppm.

NMR data were in agreement with those reported.<sup>32</sup>

**Mp.**: 100 – 104  $^\circ\text{C}$ ; **HRMS-ESI**  $m/z$  calculated for  $\text{C}_{17}\text{H}_{19}\text{NO}_3\text{S}$   $[\text{M}+\text{H}]^+$  318.1158, found 318.1160.

#### (S)-4-Methyl-N-(1-oxo-1,3-diphenylpropan-2-yl)benzenesulfonamide (S5)

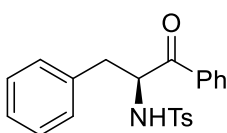

A solution of amide **1d** (250 mg, 1 equiv., 0.69 mmol) in THF (1.6 mL) was added dropwise to a solution of  $\text{PhMgBr}$  3 M in  $\text{Et}_2\text{O}$  (0.8 mL, 3.4 equiv., 2.35 mmol) under inert atmosphere and at 0  $^\circ\text{C}$ . The reaction was stirred at room temperature for 24 h. Then, the crude was quenched adding a saturated aqueous  $\text{NH}_4\text{Cl}$  solution (2 mL).

After that, layers were separated, and the aqueous phase was extracted with EtOAc (3 x 5 mL). The combined organic layers were dried over  $\text{MgSO}_4$  and concentrated under reduced pressure. The crude was then purified by flash chromatography eluting with Hex/EtOAc (7:3) to obtain the ketone **S5** as a white solid (230 mg, 88%).

**$^1\text{H}$  NMR** (400 MHz,  $\text{CDCl}_3$ )  $\delta$  7.71 – 7.58 (m, 2H), 7.58 – 7.44 (m, 3H), 7.38 – 7.31 (m, 2H), 7.15 – 7.06 (m, 3H), 7.01 ( $\text{A}_2\text{X}_2$  part X,  $J_{\text{XA}}$  = 8.1 Hz, 2H), 6.93 – 6.88 (m, 2H), 5.54 (bs, 1H), 5.06 (dt,  $J$  = 8.8, 5.7 Hz, 1H), 3.06 (dd,  $J$  = 13.9, 5.7 Hz, 1H), 2.88 (dd,  $J$  = 13.9, 5.7 Hz, 1H), 2.21 (s, 3H) ppm.

**$^{13}\text{C}\{^1\text{H}\}$  NMR** (101 MHz,  $\text{CDCl}_3$ )  $\delta$  197.4, 143.6, 136.9, 135.0, 134.3, 134.1, 129.7, 129.7, 128.9, 128.5, 127.2, 127.2, 58.3, 40.3, 21.5 ppm.

NMR data were in agreement with those reported.<sup>33</sup>

**Mp.**: 108 – 111  $^\circ\text{C}$ ; **HRMS-ESI**  $m/z$  calculated for  $\text{C}_{22}\text{H}_{21}\text{NO}_3\text{S}$   $[\text{M}+\text{H}]^+$  380.1315, found 380.1313.

$[\alpha]_D^{25}$  = +78.0 ( $c$  = 1.00,  $\text{CHCl}_3$ ).

#### (S)-4-Methyl-N-(1-phenyl-3-(phenylthio)propan-2-yl)benzenesulfonamide (S6)

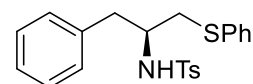

Alcohol **S3** (1 g, 1 equiv., 3.27 mmol) and  $\text{PPh}_3$  (1.72 g, 2 equiv., 6.55 mmol) were dissolved in THF (20 mL) under inert atmosphere. Then, at 0  $^\circ\text{C}$ , thiophenol (0.8 mL, 2.5 equiv., 8.19 mmol) and DIAD (1.0 mL, 1.6 equiv., 5.24 mmol) were added dropwise. The reaction was stirred at 55  $^\circ\text{C}$  for 24 h. The crude was then removed under reduced

<sup>32</sup> S. Hata, D. Fukuda, I. Hachiya and M. Shimizu, *Chem. Asian J.*, 2010, **5**, 473.

<sup>33</sup> H. Qian, S. Sun, W. Zhao and J. Sun, *Chem. Commun.*, 2020, **56**, 11295.

pressure and the crude was purified by flash chromatography eluting with Hex/EtOAc (8:2) to obtain the thioether **S6** as a white solid (654 mg, 50%).

**<sup>1</sup>H NMR** (400 MHz, CDCl<sub>3</sub>) δ 7.49 (A<sub>2</sub>X<sub>2</sub>, part A, *J*<sub>AX</sub> = 8.3 Hz, 2H), 7.32 – 7.15 (m, 8H), 7.11 (d, *J* = 8.3 Hz, 2H), 7.02 – 6.94 (m, 2H), 5.07 (d, *J* = 7.1 Hz, 1H), 3.63 – 3.44 (m, 1H), 3.20 (dd, *J* = 13.8, 4.8 Hz, 1H), 3.04 (dd, *J* = 13.9, 6.2 Hz, 1H), 2.89 (dd, *J* = 13.8, 7.4 Hz, 1H), 2.79 (dd, *J* = 13.9, 7.0 Hz, 1H), 2.40 (s, 3H) ppm.  
**<sup>13</sup>C{<sup>1</sup>H} NMR** (101 MHz, CDCl<sub>3</sub>) δ 143.1, 136.7, 136.6, 135.1, 129.6, 129.5, 129.3, 129.1, 128.6, 127.0, 126.7, 126.4, 54.1, 39.5, 38.1, 21.5 ppm.

NMR data were in agreement with those reported.<sup>34</sup>

**Mp.**: 106 – 110 °C; **HRMS-ESI** *m/z* calculated for C<sub>22</sub>H<sub>23</sub>NO<sub>2</sub>S<sub>2</sub> [M+H]<sup>+</sup> 398.1243, found 398.1240.

[α]<sub>D</sub><sup>25</sup> = -47.8 (c = 1.00, CHCl<sub>3</sub>).

#### (S)-4-Methyl-N-(1-phenyl-3-(phenylsulfonyl)propan-2-yl)benzensulfonamide (**S7**)

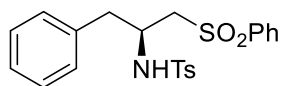

In a round bottom flask, thioether **S6** (200 mg, 1 equiv., 0.50 mmol) was dissolved in DCM (7 mL). Then, *m*CPBA (217 mg, 2.5 equiv., 1.26 mmol) was added in portions. The reaction was stirred at room temperature for 24 h. After that, a solution of Na<sub>2</sub>SO<sub>3</sub> (600 mg) in H<sub>2</sub>O (6 mL) was added to the mixture and the reaction was stirred 3 h at room temperature. Then, layers were separated, and the organic phase was dried over MgSO<sub>4</sub> and purified by flash chromatography eluting with Hex/EtOAc (6:4) to obtain the sulfone **S7** as a white solid (182 mg, 84%).

**<sup>1</sup>H NMR** (400 MHz, CDCl<sub>3</sub>) δ 7.76 – 7.64 (m, 2H), 7.64 – 7.52 (m, 1H), 7.50 – 7.38 (m, 2H), 7.26 (A<sub>2</sub>X<sub>2</sub>, part A, *J*<sub>AX</sub> = 8.4 Hz, 2H), 7.11 – 6.95 (m, 5H), 6.90 – 6.72 (m, 2H), 5.26 (d, *J* = 6.5 Hz, 1H), 3.66 – 3.52 (m, 1H), 3.39 (dd, *J* = 14.4, 4.4 Hz, 1H), 3.16 (dd, *J* = 14.4, 7.4 Hz, 1H), 3.10 (dd, *J* = 14.1, 5.7 Hz, 1H), 2.72 (dd, *J* = 14.1, 7.9 Hz, 1H), 2.29 (s, 3H) ppm.

**<sup>13</sup>C{<sup>1</sup>H} NMR** (101 MHz, CDCl<sub>3</sub>) δ 143.5, 139.2, 135.9, 135.8, 134.0, 129.6, 129.4, 129.1, 128.7, 127.9, 127.1, 126.9, 59.0, 50.9, 40.0, 21.5 ppm.

**Mp.**: 115 – 118 °C; **HRMS-ESI** *m/z* calculated for C<sub>22</sub>H<sub>23</sub>NO<sub>4</sub>S<sub>2</sub> [M+H]<sup>+</sup> 430.1141, found 430.1135

[α]<sub>D</sub><sup>25</sup> = -51.7 (c = 1.00, CHCl<sub>3</sub>).

#### 4-Methyl-N-(1-(2-methyl-1,3-dioxolan-2-yl)-2-phenylethyl)benzensulfonamide (**S8**)

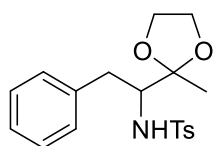

Ketone **S4** (300 mg, 1 equiv., 0.94 mmol), *p*-toluensulfonic acid monohydrate (3 mg, 0.02 equiv., 18.90 μmol), and Na<sub>2</sub>SO<sub>4</sub> (269 mg, 2 equiv., 1.89 mmol) were suspended in toluene (6 mL) under inert atmosphere. Then, ethylene glycol (63 μL, 1.2 equiv., 1.13 mmol) was added dropwise and the reaction was stirred at reflux for 18 h. The mixture was diluted with Et<sub>2</sub>O and washed with saturated aqueous NaHCO<sub>3</sub> (3 x 10 mL) and brine (2 x 10 mL). The organic layer was dried over anhydrous MgSO<sub>4</sub> and concentrated under reduced pressure. The residue was purified by flash chromatography eluting with DCM to obtain the acetal **S8** as a white solid (98 mg, 29%).

<sup>34</sup> M. Wang, J. Wei, Q. Fan and X. Jiang, *Tetrahedron*, 2016, **72**, 2671.

**<sup>1</sup>H NMR** (400 MHz, CDCl<sub>3</sub>) δ 7.36 (A<sub>2</sub>X<sub>2</sub>, part A, *J*<sub>AX</sub> = 8.3 Hz, 2H), 7.18 – 7.11 (m, 3H), 7.09 – 6.96 (m, 4H), 4.61 (d, *J* = 9.2 Hz, 1H), 4.01 – 3.72 (m, 5H), 3.05 (dd, *J* = 14.1, 4.3 Hz, 1H), 2.53 (dd, *J* = 14.1, 9.7 Hz, 1H), 2.35 (s, 3H), 1.35 (s, 3H) ppm.

**<sup>13</sup>C{<sup>1</sup>H} NMR** (101 MHz, CDCl<sub>3</sub>) δ 142.4, 139.0, 138.1, 129.5, 129.3, 128.5, 126.8, 126.3, 110.1, 65.4, 65.1, 61.7, 37.2, 22.0, 21.5 ppm.

**Mp.:** 124 – 128 °C; **HRMS-ESI** *m/z* calculated for C<sub>19</sub>H<sub>23</sub>NO<sub>4</sub>S [M+H]<sup>+</sup> 362.1421, found 362.1428

### Ethyl 2-bromo-2(phenylsulfonamido)acetate (**S9**)

This compound was synthesized according to the literature procedure.<sup>35</sup>

Glycine ethyl ester hydrochloride (1.00 g, 1.0 eq, 7.16 mmol), DMAP (17 mg, 0.02 eq, 0.14 mmol) were suspended in DCM (41 ml) under inert atmosphere. TEA (2.1 ml, 2.1 eq, 15.05 mmol) and benzenesulfonyl chloride (1.01 ml, 1.1 eq, 7.88 mmol) were added dropwise at 0 °C and the reaction mixture was stirred at room temperature for 24 h. The crude mixture was then washed with an aqueous HCl 1M (2 x 30 ml) and brine (2 x 30 ml) and dried over anhydrous MgSO<sub>4</sub>. The solvent was removed under reduced pressure and the residue was purified by flash chromatography eluting with Hex/EtOAc (7:3) to yield phenyl sulfonamide as a white solid (1.32 g, 76 %).

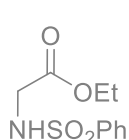

**<sup>1</sup>H NMR** (300 MHz, CDCl<sub>3</sub>) δ 7.94 – 7.73 (m, 2H), 7.63 – 7.35 (m, 3H), 5.66 (t, *J* = 5.8 Hz, 1H), 4.00 (q, *J* = 7.1 Hz, 2H), 3.74 (d, *J* = 5.8 Hz, 2H), 1.09 (t, *J* = 7.1 Hz, 3H) ppm.

Sulfonamide (300 mg, 1.0 eq, 1.23 mmol) was suspended in freshly distilled CCl<sub>4</sub> (2.4 ml) under inert atmosphere. Then, Br<sub>2</sub> (63 μl, 1.0 eq, 1.23 mmol) was added. The mixture was

degassed bubbling Ar during 15 minutes and the reaction was stirred under 390 nm Kessil lamp

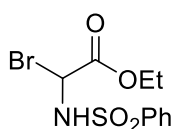

irradiation for 6 h. Upon completion of the reaction, the crude was concentrated under reduced pressure and the residue was redissolved in DCM and precipitated with hexane to obtain the brominated compound **S9** as an orange wish solid (311 mg, 78 %), that decomposes in solid or in solution in a few hours.

**<sup>1</sup>H NMR** (400 MHz, CDCl<sub>3</sub>) δ 8.09 – 7.85 (m, 2H), 7.72 – 7.60 (m, 1H), 7.55 (m, 2H), 6.16 (d, *J* = 11.0 Hz, 1H), 6.06 (d, *J* = 11.0 Hz, 1H), 4.30 (q, *J* = 7.1 Hz, 2H), 1.31 (t, *J* = 7.1 Hz, 3H) ppm.

**<sup>13</sup>C{<sup>1</sup>H} NMR** (101 MHz, CDCl<sub>3</sub>) δ 165.6, 138.8, 134.0, 129.4, 128.0, 63.6, 53.9, 13.9 ppm.

NMR data were in agreement with those reported.<sup>36</sup>

<sup>35</sup> P. D. Clayman and T. K. Hyster, *J. Am. Chem. Soc.*, 2020, **142**, 15673.

<sup>36</sup> A. K. McFarlane, G. Thomas and A. Whiting, *J. Chem. Soc., Perkin Trans. 1*, 1995, 2803.

**N-iodoimides** have been prepared according to the literature procedure.<sup>37</sup>

### 5-Bromo-2-iodoisindoline-1,3-dione (**S1ab**)

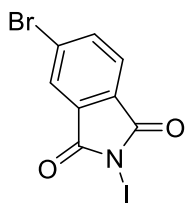

5-bromoisindoline-1,3-dione (500 mg, 1 equiv., 2.21 mmol), PIDA (427 mg, 0.6 equiv., 1.33 mmol) and  $I_2$  (365 mg, 0.65 equiv., 1.44 mmol) were dissolved in MeCN (11 mL) under inert atmosphere. The mixture was stirred for 6 h and the solvent was removed under reduced pressure. The residue was redissolved in  $CCl_4$  (11 mL) and stirred for 1 h at room temperature and 15 minutes at 0 °C. Then, the precipitate was filtered with a filter plate and was washed with cold  $CCl_4$  (4 x 10 mL), EtOAc (3 x 10 mL) and hexane (5 x 10 mL) to obtain pure **S1ab** as a white solid (560 mg, 72%).

$^1H$  NMR (400 MHz,  $CD_3COCD_3$ )  $\delta$  7.99 – 7.92 (m, 2H), 7.78 – 7.72 (m, 1H) ppm.

$^{13}C\{^1H\}$  NMR (101 MHz,  $CD_3COCD_3$ )  $\delta$  169.8, 169.3, 137.4, 135.6, 132.7, 128.4, 126.8, 125.6 ppm.

Mp.: 236 – 240 °C; HRMS-ESI  $m/z$  calculated for  $C_8H_4NO_2 [M-I+H]^+$  225.9498, found 225.9497.

### 3-Ethyl-1-iodo-3-methylpyrrolidine-2,5-dione (**S1ac**)

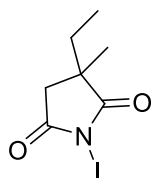

3-Ethyl-3-methylpyrrolidine-2,5-dione (565 mg, 1 equiv., 4.00 mmol), PIDA (773 mg, 0.6 equiv., 2.40 mmol) and  $I_2$  (660 mg, 0.65 equiv., 2.60 mmol) were dissolved in MeCN (20 mL) under inert atmosphere. The mixture was stirred for 6 h and the solvent was removed under reduced pressure. The residue was redissolved in  $CCl_4$  (15 mL) and stirred for 1 h at room temperature and 15 minutes at 0 °C. Then, the precipitate was filtered with a filter plate and was washed with cold  $CCl_4$  (4 x 5 mL), EtOAc (1 x 5 mL) and hexane (5 x 10 mL) to obtain pure **S1ac** as a white solid (786 mg, 73%).

$^1H$  NMR (400 MHz,  $CDCl_3$ )  $\delta$  2.88 (d,  $J$  = 18.0 Hz, 1H), 2.69 (d,  $J$  = 18.0 Hz), 1.75 (dd,  $J$  = 13.8, 7.5 Hz, 1H), 1.61 – 1.50 (m, 1H), 1.31 (s, 3H), 0.85 (t,  $J$  = 7.5 Hz, 3H) ppm.

$^{13}C\{^1H\}$  NMR (101 MHz, C)  $\delta$  183.8, 176.8, 47.2, 41.0, 32.0, 24.6, 8.8 ppm.

Mp.: 117 – 121 °C.

### 3-Iodo-5,5-dimethyloxazolidine-2,4-dione (**S1ad**)

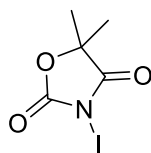

5,5-Dimethyloxazolidine-2,4-dione (520 mg, 1 equiv., 4.03 mmol), PIDA (778 mg, 0.6 equiv., 2.42 mmol) and  $I_2$  (664 mg, 0.65 equiv., 2.62 mmol) were dissolved in MeCN (17 mL) under inert atmosphere. The mixture was stirred for 6 h and the solvent was removed under reduced pressure. The residue was redissolved in  $CCl_4$  (15 mL) and stirred for 1 h at room temperature and 15 minutes at 0 °C. Then, the precipitate was filtered with a filter plate and was washed with cold  $CCl_4$  (4 x 5 mL), EtOAc (1 x 3 mL) and hexane (5 x 10 mL) to obtain pure **S1ad** as a white solid (645 mg, 63%).

$^1H$  NMR (400 MHz,  $CD_3COCD_3$ )  $\delta$  1.52 (s, 6H) ppm.

<sup>37</sup> A. Artaryan, A. Mardyukov, K. Kulbitski, I. Avigdori, G. A. Nisnevich, P. R. Schreiner and M. Gandelman, *J. Org. Chem.*, 2017, **82**, 7093.

**$^{13}\text{C}\{^1\text{H}\}$  NMR** (101 MHz,  $\text{CD}_3\text{COCD}_3$ )  $\delta$  179.7, 155.3, 85.9, 24.1 ppm.

**Mp.:** 190 – 194 °C; **HRMS-ESI**  $m/z$  calculated for  $\text{C}_5\text{H}_7\text{NO}$   $[\text{M}-\text{I}+\text{H}]^+$  130.0499, found 130.0496.

### 3-Iodo-5,5-diphenylimidazolidine-2,4-dione (**S1af**)

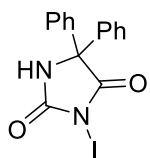

5,5-Diphenylimidazolidine-2,4-dione (520 mg, 1 equiv., 2.06 mmol), PIFA (492 mg, 0.6 equiv., 1.24 mmol) and  $\text{I}_2$  (314 mg, 0.6 equiv., 1.24 mmol) were dissolved in MeCN (10 mL) under inert atmosphere. The mixture was stirred for 6 h and the solvent was removed under reduced pressure. The residue was redissolved in  $\text{CCl}_4$  (8 mL) and stirred for 1 h at room temperature and 15 minutes at 0 °C. Then, the precipitate was filtered with a filter plate and was washed with cold  $\text{CCl}_4$  (4 x 10 mL) and hexane (5 x 10 mL). The solid was concentrated under reduced pressure to remove traces of TFA to obtain **S1af** as a reddish solid (585 mg, 75%).

**$^1\text{H}$  NMR** (400 MHz,  $\text{CD}_3\text{COCD}_3$ )  $\delta$  7.48 – 7.42 (m, 5H), 7.42 – 7.34 (m, 3H), 7.33 – 7.25 (m, 3H) ppm.

**$^{13}\text{C}\{^1\text{H}\}$  NMR** (101 MHz,  $\text{CD}_3\text{COCD}_3$ )  $\delta$  176.0, 175.5, 156.2, 156.0, 138.7, 128.7, 128.5, 128.4, 128.2, 126.8, 78.5. ppm.

**Mp.:** 172 – 175 °C; **HRMS-ESI**  $m/z$  calculated for  $\text{C}_{15}\text{H}_{11}\text{IN}_2\text{O}_2$   $[\text{M}+\text{H}]^+$  378.9938, found 378.9932.

### N-iodothalidomide (**S1ag**)

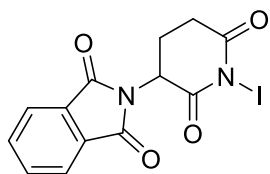

Thalidomide (500 mg, 1 equiv., 1.94 mmol), PIDA (374 mg, 0.6 equiv., 1.16 mmol) and  $\text{I}_2$  (319 mg, 0.65 equiv., 1.26 mmol) were dissolved in MeCN (10 mL) under inert atmosphere. The mixture was stirred for 6 h and the solvent was removed under reduced pressure. The residue was redissolved in  $\text{CCl}_4$  (11 mL) and stirred for 1 h at room temperature and 15 minutes at 0 °C. Then, the precipitate was filtered with a filter plate and was washed with cold  $\text{CCl}_4$  (4 x 10 mL), EtOAc (2 x 5 mL) and hexane (5 x 10 mL) to obtain pure **S1ag** as a white solid (423 mg, 57%).

**$^1\text{H}$  NMR** (400 MHz,  $\text{CD}_3\text{COCD}_3$ )  $\delta$  7.91 (s, 4H), 5.32 (dd,  $J$  = 13.1, 5.4 Hz, 1H), 3.24 – 3.01 (m, 2H), 2.71 (qd,  $J$  = 13.1, 5.6 Hz, 1H), 2.11 (dtd,  $J$  = 13.1, 5.2, 2.8 Hz, 1H) ppm.

**$^{13}\text{C}\{^1\text{H}\}$  NMR** (101 MHz,  $\text{CD}_3\text{COCD}_3$ )  $\delta$  173.8, 171.9, 167.9, 135.5, 132.8, 124.2, 49.9, 31.3, 23.2 ppm.

**Mp:** 230 – 232 °C; **HRMS-ESI**  $m/z$  calculated for  $\text{C}_{13}\text{H}_{10}\text{N}_2\text{O}_4$   $[\text{M}-\text{I}+\text{H}]^+$  259.0713, found 259.0714.



## 4.2 gem-Diamines

### Ethyl-2-(2,5-dioxopyrrolidin-1-yl)-2-(4-methylphenylsulfonamide) acetate (**2a**)

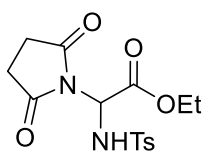

Compound **1a** (70 mg, 1 equiv., 0.20 mmol) and NIS (90 mg, 2 equiv., 0.40 mmol) were dissolved in DCM (2.0 mL) under inert atmosphere. The reaction mixture was stirred at room temperature with white Kessil lamp irradiation for 24 h following the general procedure. The crude was washed with an aqueous saturated  $\text{Na}_2\text{S}_2\text{O}_3$  solution (3 x 5 mL),  $\text{H}_2\text{O}$  (2 x 5 mL) and brine (2 x 5 mL) to yield compound **2a** as a white solid (69 mg, 96%).

The general procedure was followed to scale-up the reaction to 1 mmol of Phe derivative **1a** to get 250 mg (70%, 82% conversion) after chromatography column (DCM/EtOAc, 9:1).

**$^1\text{H}$  NMR** (400 MHz,  $\text{CDCl}_3$ )  $\delta$  7.73 (d,  $J$  = 8.0 Hz, 2H), 7.30 (d,  $J$  = 8.0 Hz, 2H), 6.31 (d,  $J$  = 8.7 Hz, 1H), 5.83 (d,  $J$  = 8.8 Hz, 1H), 4.19 (q,  $J$  = 7.1 Hz, 2H), 2.49 (s, 4H), 2.42 (s, 3H), 1.20 (t,  $J$  = 7.1 Hz, 3H) ppm.

**$^{13}\text{C}\{^1\text{H}\}$  NMR** (101 MHz,  $\text{CDCl}_3$ )  $\delta$  175.2, 165.0, 144.2, 136.7, 129.8, 127.5, 63.7, 58.5, 28.0, 21.7, 14.0 ppm.

**Mp.:** 177 – 180 °C; **HRMS-ESI**  $m/z$  calculated for  $\text{C}_{15}\text{H}_{18}\text{N}_2\text{O}_6\text{S}$   $[\text{M}+\text{H}]^+$  355.0958, found 355.0962.

### Ethyl 2-(2,5-dioxopyrrolidin-1-yl)-2-(methylsulfonamido)acetate (**2aMs**)

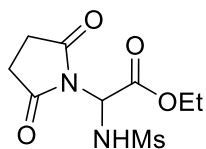

Compound **1aMs** (54 mg, 1.0 eq, 0.2 mmol) and NIS (90 mg, 2.0 eq, 0.4 mmol) were dissolved in DCM (2.0 ml) under inert atmosphere. The reaction mixture was stirred at room temperature with white Kessil lamp irradiation for 24 h following the general procedure. The solvent was then removed under reduced pressure and the crude product was purified by flash chromatography eluting with DCM/EtOAc (8:2) to yield compound **2aMs** as a yellowish solid (45 mg, 81 %).

**$^1\text{H}$  NMR** (400 MHz,  $\text{CDCl}_3$ )  $\delta$  6.11 (d,  $J$  = 9.1 Hz, 1H), 5.99 (d,  $J$  = 9.1 Hz, 1H), 4.28 (ABX<sub>3</sub>, part AB,  $J_{\text{AB}}$  = 7.1 Hz,  $J_{\text{X}}$  = 1.4 Hz, 2H), 3.07 (s, 3H), 2.93 – 2.70 (m, 4H), 1.28 (t,  $J$  = 7.1 Hz, 3H) ppm.

**$^{13}\text{C}\{^1\text{H}\}$  NMR** (101 MHz,  $\text{CDCl}_3$ )  $\delta$  175.5, 165.8, 63.9, 58.6, 42.1, 28.3, 14.1 ppm.

**Mp.:** 144 – 149 °C; **HRMS-ESI**  $m/z$  calculated for  $\text{C}_9\text{H}_{14}\text{N}_2\text{O}_6\text{S}$   $[\text{M}+\text{H}]^+$  279.0645, found 279.0647

### Ethyl 2-(2,5-dioxopyrrolidin-1-yl)-2-((trifluoromethyl)sulfonamido)acetate (**2aTf**)

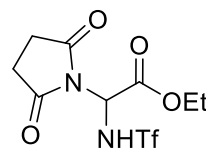

Compound **1aTf** (65 mg, 1.0 eq, 0.2 mmol) and NIS (90 mg, 2.0 eq, 0.4 mmol) were dissolved in DCM (2.0 ml) under inert atmosphere. The reaction mixture was stirred at room temperature with white Kessil lamp irradiation for 24 h following the general procedure. The solvent was then removed under reduced pressure and the crude product was purified by flash chromatography eluting with DCM/EtOAc (8:2) to yield compound **2aTf** as a yellowish solid (9 mg, 14 % [24% conversion]).

**$^1\text{H}$  NMR** (400 MHz,  $\text{CDCl}_3$ )  $\delta$  6.05 (s, 1H), 4.32 (ABX<sub>3</sub>, part AB,  $J_{\text{AB}}$  = 7.1 Hz,  $J_{\text{X}}$  = 1.1 Hz, 2H), 2.84 (m, 4H), 1.30 (t,  $J$  = 7.1 Hz, 3H) ppm.

**$^{13}\text{C}\{^1\text{H}\}$  NMR** (101 MHz,  $\text{CDCl}_3$ )  $\delta$  175.0, 164.3, 119.34 (q,  $J$  = 323.9 Hz), 64.4, 58.7, 28.2, 14.1 ppm.

<sup>19</sup>F NMR (376 MHz, CDCl<sub>3</sub>) δ -77.5 (s) ppm.

**Mp.:** 122 – 126 °C; **HRMS-ESI** m/z calculated for C<sub>9</sub>H<sub>11</sub>F<sub>3</sub>N<sub>2</sub>O<sub>6</sub>S [M+H]<sup>+</sup> 333.0363, found 333.0364.

### Methyl-2-(2,5-dioxopyrrolidin-1-yl)-2-(4-methylphenylsulfonamide) acetate (**2b**)

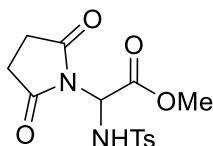

Compound **1b** (101 mg, 1.0 equiv., 0.2 mmol) and NIS (90 mg, 2.0 equiv., 0.4 mmol) were dissolved in DCM (2.0 mL) under inert atmosphere. The reaction mixture was stirred at room temperature with white Kessil lamp irradiation for 24 h following the general procedure. The solvent was then removed under reduced pressure and the crude product was purified by flash chromatography eluting with DCM/EtOAc (9:1) to yield compound **2b** as a white solid (61 mg, 90%).

<sup>1</sup>H NMR (400 MHz, CDCl<sub>3</sub>) δ 7.74 (d, *J* = 8.1 Hz, 2H), 7.30 (d, *J* = 8.1 Hz, 2H), 6.20 (d, *J* = 8.7 Hz, 1H), 5.85 (d, *J* = 8.7 Hz, 1H), 3.75 (s, 3H), 2.50 (s, 4H), 2.43 (s, 3H) ppm.

<sup>13</sup>C{<sup>1</sup>H} NMR (101 MHz, CDCl<sub>3</sub>) δ 175.1, 165.6, 144.4, 136.6, 129.9, 127.6, 58.4, 54.2, 28.1, 21.7 ppm.

**Mp.:** 194 – 196 °C; **HRMS-ESI** m/z calculated for C<sub>14</sub>H<sub>16</sub>N<sub>2</sub>O<sub>6</sub>S [M+H]<sup>+</sup> 341.0802, found 341.0808.

### 1,3-Dioxoisindolin-2-yl 2-(2,5-dioxopyrrolidin-1-yl)-2-((4-methylphenyl)sulfonamido) acetate (**2c**)

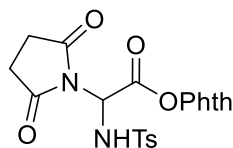

Compound **1c** (93 mg, 1.0 equiv., 0.2 mmol) and NIS (90 mg, 2.0 equiv., 0.4 mmol) were dissolved in DCM (2.0 mL) under inert atmosphere. The reaction mixture was stirred at room temperature with white Kessil lamp irradiation for 24 h following the general procedure. The solvent was then removed under reduced pressure and the crude product was purified by flash chromatography eluting

with DCM/EtOAc (6:4). The fraction containing the product was concentrated, redissolved in EtOAc, extracted with H<sub>2</sub>O (3 x 5 mL) and dried over anhydrous MgSO<sub>4</sub>. The solvent was removed under reduced pressure to obtain compound **2c** as a white solid (51 mg, 53%).

<sup>1</sup>H NMR (400 MHz, CDCl<sub>3</sub>) δ 7.90 – 7.82 (m, 2H), 7.84 – 7.77 (m, 2H), 7.76 (d, *J* = 8.2 Hz, 2H), 7.34 (d, *J* = 8.2 Hz, 1H), 6.44 (d, *J* = 10.4 Hz, 1H), 6.36 (d, *J* = 10.4 Hz, 1H), 2.57 (s, 4H), 2.44 (s, 3H) ppm.

<sup>13</sup>C{<sup>1</sup>H} NMR (101 MHz, CDCl<sub>3</sub>) δ 174.7, 162.5, 160.9, 144.7, 135.3, 134.7, 130.1, 128.7, 127.5, 124.4, 123.8, 57.5, 28.1, 21.8 ppm.

**Mp.:** 188 – 192 °C.

### 2-(2,5-Dioxopyrrolidin-1-yl)-*N*-methoxy-*N*-methyl-2-((4-methylphenyl)sulfonamido) acetamide (**2d**)

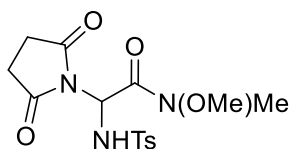

Compound **1d** (73 mg, 1.0 equiv., 0.2 mmol) and NIS (90 mg, 2.0 equiv., 0.4 mmol) were dissolved in DCM (2.0 mL) under inert atmosphere. The reaction mixture was stirred at room temperature with white Kessil lamp irradiation for 24 h following the general procedure. The solvent was then removed under

reduced pressure and the crude product was purified by flash chromatography eluting with DCM/EtOAc (6:4). The fraction containing the product was concentrated, redissolved in EtOAc, extracted with H<sub>2</sub>O (3 x 5 mL) and dried over anhydrous MgSO<sub>4</sub>. The solvent was removed under reduced pressure to obtain compound **2d** as a white solid (46 mg, 63%)

**<sup>1</sup>H NMR** (400 MHz, CDCl<sub>3</sub>) δ 7.72 (A<sub>2</sub>X<sub>2</sub> part A, *J*<sub>AX</sub> = 8.4 Hz, 2H), 7.30 (A<sub>2</sub>X<sub>2</sub> part X, *J*<sub>XA</sub> = 8.4 Hz, 2H), 6.65 (d, *J* = 9.1 Hz, 1H), 6.10 (d, *J* = 9.1 Hz, 1H), 3.67 (s, 3H), 3.17 (s, 3H), 2.42 (s, 3H), 2.36-2.32 (bs, 4H) ppm.

**<sup>13</sup>C{<sup>1</sup>H} NMR** (101 MHz, CDCl<sub>3</sub>) δ 175.3, 163.8, 144.2, 137.0, 129.8, 127.5, 62.0, 58.2, 33.0, 27.9, 21.7 ppm.

**Mp.:** 132 – 136 °C; **HRMS-ESI** *m/z* calculated for C<sub>15</sub>H<sub>19</sub>N<sub>3</sub>O<sub>6</sub>S [M]<sup>+</sup> 369.0995, found 369.0913.

## 2-(2,5-Dioxopyrrolidin-1-yl)-2-(4-methylphenylsulfonamide)acetamide (2e)

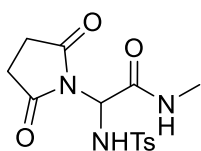

Compound **1e** (30 mg, 1.0 equiv., 90 μmol) and NIS (41 mg, 2 equiv., 0.18 mmol) were dissolved in DCM (0.9 mL) under inert atmosphere. The reaction mixture was stirred at room temperature with white Kessil lamp irradiation for 24 h following the general procedure. The solvent was then removed under reduced pressure and the crude product was purified by flash chromatography eluting with DCM/EtOAc (7:3). The fraction containing the product was concentrated, redissolved in EtOAc, extracted with H<sub>2</sub>O (3 x 5 mL) and dried over anhydrous MgSO<sub>4</sub>. The solvent was removed under reduced pressure to obtain compound **2e** as a white solid (15 mg, 49%).

**<sup>1</sup>H NMR** (400 MHz, CDCl<sub>3</sub>) δ 7.68 (A<sub>2</sub>X<sub>2</sub> part A, *J*<sub>AX</sub> = 8.3 Hz, 2H), 7.31 (A<sub>2</sub>X<sub>2</sub> part X, *J*<sub>XA</sub> = 8.3 Hz, 2H), 6.71 (bs), 6.46 (d, *J* = 11.3 Hz, 1H), 5.80 (d, *J* = 11.3 Hz, 1H), 2.86 (d, *J* = 4.9 Hz, 3H), 2.43 (s, 3H), 2.29 (bs, 4H) ppm.

**<sup>13</sup>C{<sup>1</sup>H} NMR** (101 MHz, CDCl<sub>3</sub>) δ 175.9, 164.2, 144.7, 136.1, 130.0, 127.5, 61.0, 28.0, 27.1, 21.7 (CH<sub>3</sub>Ar) ppm.

**Mp.:** 175 – 178 °C; **HRMS-ESI** *m/z* calculated for C<sub>14</sub>H<sub>17</sub>N<sub>3</sub>O<sub>5</sub>S [M+H]<sup>+</sup> 340.0962, found 340.0960.

## N-Benzy-2-(2,5-dioxopyrrolidin-1-yl)-2-((4-methylphenyl)sulfonamido)acetamide (2f)

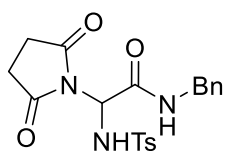

Compound **1f** (82 mg, 1.0 equiv., 0.2 mmol) and NIS (90 mg, 2.0 equiv., 0.4 mmol) were dissolved in DCM (2.0 mL) under inert atmosphere. The reaction mixture was stirred at room temperature with white Kessil lamp irradiation for 24 h following the general procedure. The solvent was then removed under reduced pressure and the crude product was purified by flash chromatography eluting with DCM/EtOAc (8:2) to yield compound **2f** as a white solid (60 mg, 72%).

**<sup>1</sup>H NMR** (400 MHz, CDCl<sub>3</sub>) δ 7.71 – 7.62 (A<sub>2</sub>X<sub>2</sub> part A, *J*<sub>AX</sub> = 8.4 Hz, 2H), 7.43 – 7.19 (m, 7H), 7.01 – 6.96 (m, 1H), 6.47 (d, *J* = 11.2 Hz, 1H), 5.86 (d, *J* = 11.2 Hz, 1H), 4.50 (dd, *J* = 14.8, 6.1 Hz, 1H), 4.40 (dd, *J* = 14.8, 5.7 Hz, 1H), 2.43 (s, 3H), 2.28 (s, 4H) ppm.

**<sup>13</sup>C{<sup>1</sup>H} NMR** (101 MHz, CDCl<sub>3</sub>) δ 175.9, 163.6, 144.7, 137.1, 136.1, 129.9, 129.0, 127.9, 127.5, 61.0, 44.5, 28.0, 21.7 ppm.

**Mp.:** 188 – 192 °C; **HRMS-ESI** *m/z* calculated for C<sub>20</sub>H<sub>21</sub>N<sub>3</sub>O<sub>5</sub>S [M]<sup>+</sup> 415.1202, found 415.1229.

**2-(2,5-Dioxopyrrolidin-1-yl)-2-((4-methylphenyl)sulfonamido)-*N*-((*S*)-2-(naphthalen-1-yl)ethyl)acetamide (2g)**

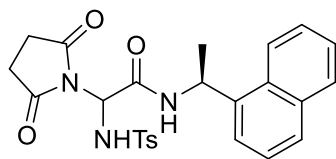

Compound **1g** (95 mg, 1 equiv., 0.20 mmol) and NIS (90 mg, 2 equiv., 0.40 mmol) were dissolved in DCM (2.0 mL) under inert atmosphere. The reaction mixture was stirred at room temperature with white Kessil lamp irradiation for 24 h following the general procedure. The crude was concentrated under reduced pressure and purified by flash chromatography eluting with DCM/EtOAc (8:2) to obtain compound **2g** as a white solid (57 mg, 59% (69:31 *dr*))

Major diastereomer: **<sup>1</sup>H NMR** (400 MHz, CDCl<sub>3</sub>) δ 8.00 – 7.92 (m, 1H), 7.90 – 7.85 (m, 1H), 7.85 – 7.77 (m, 1H), 7.64 (d, *J* = 8.3 Hz, 2H), 7.59 – 7.40 (m, 4H), 7.28 – 7.22 (m, 2H), 6.80 (d, *J* = 8.1 Hz, 1H), 6.43 (d, *J* = 11.2 Hz, 1H), 5.84 (quin<sub>app</sub>, *J* = 6.9 Hz, 1H), 5.77 (d, *J* = 11.2 Hz, 1H), 2.41 (s, 3H), 2.27 (bs, 4H), 1.68 (d, *J* = 6.9 Hz, 3H) ppm.

**<sup>13</sup>C NMR** (101 MHz, CDCl<sub>3</sub>) δ 175.9, 162.6, 144.7, 137.2, 136.1, 134.1, 131.0, 129.9, 129.1, 128.8, 127.4, 126.9, 126.0, 125.4, 122.9, 122.8, 61.0, 46.1, 27.9, 21.7, 21.0 ppm.

**Mp.**: 129 – 133 °C; **HRMS-ESI** *m/z* calculated for C<sub>25</sub>H<sub>25</sub>N<sub>3</sub>O<sub>5</sub>S [M+H]<sup>+</sup> 480.1588 found 480.1589 [α]<sub>D</sub><sup>25</sup> = -8.7 (c = 1.00, CHCl<sub>3</sub>).

***N*-(Cyano(2,5-dioxopyrrolidin-1-yl)methyl)-4-methylbenzensulfonamide (2h)**

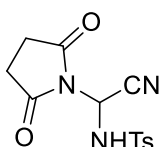

Compound **1h** (60 mg, 1.0 equiv., 0.2 mmol) and NIS (90 mg, 2.0 equiv., 0.4 mmol) were dissolved in DCM (2.0 mL) under inert atmosphere. The reaction mixture was stirred at room temperature with white Kessil lamp irradiation for 24 h following the general procedure. The solvent was then removed under reduced pressure and the crude product was purified by flash chromatography eluting with DCM/EtOAc (7:3). The fraction containing the product was concentrated, redissolved in EtOAc, extracted with H<sub>2</sub>O (3 x 5 mL) and dried over anhydrous MgSO<sub>4</sub>. The solvent was removed under reduced pressure to obtain compound **2h** as a white solid (23 mg, 37% [49% brsm])

**<sup>1</sup>H NMR** (400 MHz, CD<sub>3</sub>COCD<sub>3</sub>) δ 8.49 (d, *J* = 7.3 Hz, 1H), 7.75 (A<sub>2</sub>X<sub>2</sub> part A, *J*<sub>AX</sub> = 8.4 Hz, 2H), 7.46 (A<sub>2</sub>X<sub>2</sub> part X, *J*<sub>XA</sub> = 8.4 Hz, 2H), 6.40 (d, *J* = 7.3 Hz, 1H), 2.57 – 2.51 (m, 4H), 2.45 (s, 3H) ppm.

**<sup>13</sup>C{<sup>1</sup>H} NMR** (101 MHz, CD<sub>3</sub>COCD<sub>3</sub>) δ 175.2, 145.3, 138.5, 130.7, 127.8, 113.6, 48.6, 28.7, 21.5 ppm.

**Mp.**: 195 – 199 °C; **HRMS-ESI** *m/z* calculated for C<sub>13</sub>H<sub>13</sub>N<sub>3</sub>O<sub>4</sub>S [M+Na]<sup>+</sup> 330.0519, found 330.0505.

***N*-((2,5-Dioxopyrrolidin-1-yl)methyl)-2-(4-methylbenzensulfonamide) (2i)**

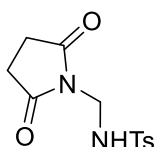

Compound **1i** (55 mg, 1.0 equiv., 0.20 mmol) and NIS (90 mg, 2 equiv., 0.40 mmol) were dissolved in DCM (2.0 mL) under inert atmosphere. The reaction mixture was stirred at room temperature with White Kessil irradiation for 24 h following the general procedure. The solvent was then removed under reduced pressure and the crude product was purified by flash chromatography eluting with DCM/EtOAc (98:2) to yield compound **2i** as a white solid (29 mg, 52 %). The same procedure was used for 0.2 mmol of compound **1ia** (45 mg, 80%).

**<sup>1</sup>H NMR** (400 MHz, CDCl<sub>3</sub>) δ 7.72 (A<sub>2</sub>X<sub>2</sub> part A, *J*<sub>AX</sub> = 8.4 Hz, 2H), 7.31 (A<sub>2</sub>X<sub>2</sub> part X, *J*<sub>XA</sub> = 8.3 Hz, 2H), 5.76 (t, *J* = 7.4 Hz, 1H), 4.81 (d, *J* = 7.4 Hz, 1H), 2.43 (s, 3H), 2.35 (s, 4H) ppm.

**<sup>13</sup>C{<sup>1</sup>H} NMR** (101 MHz, CDCl<sub>3</sub>) δ 176.1, 144.1, 137.4, 129.8, 127.4, 47.3, 28.1, 21.7 ppm.

**Mp.:** 186 – 188 °C; **HRMS-ESI** *m/z* calculated for C<sub>12</sub>H<sub>14</sub>N<sub>2</sub>O<sub>4</sub>S [M+H]<sup>+</sup> 283.0747, found 283.0745.

#### ***N*-(1-(2,5-Dioxopyrrolidin-1-yl)-2-phenylethyl)-4-methylbenzensulfonamide (2j)**

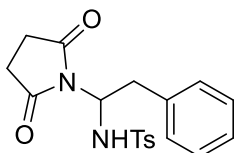

Compound **1j** (73 mg, 1.0 equiv., 0.2 mmol) and NIS (90 mg, 2.0 equiv., 0.4 mmol) were dissolved in DCM (2.0 mL) under inert atmosphere. The reaction mixture was stirred at room temperature with white Kessil lamp irradiation for 24 h following the general procedure. The solvent was then removed under reduced pressure and the crude product was purified by flash chromatography eluting with DCM/EtOAc (95.5:0.5) to obtain compound **2j** as a white solid (30 mg, 40%).

**<sup>1</sup>H NMR** (400 MHz, CDCl<sub>3</sub>) δ 7.61 (A<sub>2</sub>X<sub>2</sub> part A, *J*<sub>AX</sub> = 8.3 Hz, 2H), 7.25 – 7.17 (m, 5H), 7.10 – 7.03 (m, 2H), 6.07 (d, *J* = 11.1 Hz, 1H), 5.59 (ddd, *J* = 11.1, 9.1, 6.9 Hz, 1H), 3.25 (dd, *J* = 13.8, 6.9 Hz, 1H), 3.11 (dd, *J* = 13.8, 9.1 Hz, 1H), 2.40 (s, 3H), 2.04 (bs, 4H) ppm.

**<sup>13</sup>C{<sup>1</sup>H} NMR** (101 MHz, CDCl<sub>3</sub>) δ 143.9, 137.0, 134.6, 129.7, 129.2, 128.8, 127.5, 127.4, 62.1, 39.4, 27.7, 21.7 ppm.

**Mp.:** 165 – 169 °C; **HRMS-ESI** *m/z* calculated for C<sub>19</sub>H<sub>20</sub>N<sub>2</sub>O<sub>4</sub>S [M+NH<sub>4</sub>]<sup>+</sup> 390.1482, found 390.1478.

#### ***N,N'*-(1-(2,5-Dioxopyrrolidin-1-yl)ethane-1,2-diyl)bis(4-methylbenzensulfonamide) (2k)**

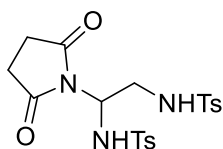

Disulfonamide **1k** (92 mg, 1 equiv., 0.20 mmol) and NIS (90 mg, 2 equiv., 0.40 mmol) were dissolved in DCM (2.0 mL) under inert atmosphere. The reaction mixture was stirred at room temperature with white Kessil lamp irradiation for 24 h following the general procedure. The crude was concentrated under reduced

pressure and purified by flash chromatography eluting with DCM/EtOAc (8:2) to obtain compound **2k** as a white solid (18 mg, 19%).

**<sup>1</sup>H NMR** (400 MHz, CD<sub>3</sub>COCD<sub>3</sub>) δ 7.72 – 7.54 (m, 4H), 7.51 – 7.26 (m, 4H), 7.12 (d, *J* = 10.5 Hz, 1H), 6.78 (t, *J* = 6.9 Hz, 1H), 5.42 (ddd, *J* = 10.5, 9.0, 5.3 Hz, 1H), 3.46 (ddd, *J* = 13.9, 9.0, 6.9 Hz, 1H), 3.20 (ddd, *J* = 14.0, 6.9, 5.3 Hz, 1H), 2.44 (s, 3H), 2.42 (s, 3H), 2.19 (bs, 4H) ppm.

**<sup>13</sup>C{<sup>1</sup>H} NMR** (101 MHz, CD<sub>3</sub>COCD<sub>3</sub>) δ 177.1, 144.7, 144.2, 138.8, 138.7, 130.7, 130.5, 127.7, 61.3, 44.2, 28.4, 21.4, 21.4 ppm.

**Mp.:** 160 – 164 °C; **HRMS-ESI** *m/z* calculated for C<sub>20</sub>H<sub>23</sub>N<sub>3</sub>O<sub>6</sub>S<sub>2</sub> [M+H]<sup>+</sup> 466.1101, found 466.1074.

#### **(S)-4-Methyl-*N*-(1-(tosyl-1,2,3,4-tetrahydroquinolin-3-yl)benzensulfonamide (S8)**

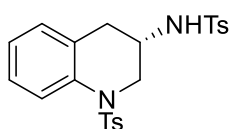

In the conditions described to obtain compound **2k**, tetrahydroquinoline **S8** was also isolated as a white solid (53 mg, 58 %).

**<sup>1</sup>H NMR** (400 MHz, CDCl<sub>3</sub>) δ 7.76 – 7.67 (m, 3H), 7.46 (A<sub>2</sub>X<sub>2</sub>, part A, *J*<sub>AX</sub> = 8.4 Hz, 2H), 7.31 (d, *J* = 8.0 Hz, 2H), 7.22 – 7.13 (m, 3H), 7.05 (td, *J* = 7.5, 1.2 Hz, 1H), 6.90 (d, *J* = 7.6 Hz, 1H), 4.85 (d,

$J = 8.1$  Hz, 1H), 4.09 (dd,  $J = 13.5, 4.5$  Hz, 1H), 3.52 – 3.37 (m, 1H), 3.29 (dd,  $J = 13.5, 8.7$  Hz, 1H), 2.59 (dd,  $J = 16.3, 5.8$  Hz, 1H), 2.45 (s, 3H), 2.40 – 2.30 (m, 4H) ppm.

$^{13}\text{C}\{^1\text{H}\}$  NMR (101 MHz,  $\text{CDCl}_3$ )  $\delta$  144.0, 143.9, 137.6, 136.3, 136.0, 130.0, 129.9, 129.6, 127.4, 127.2, 127.2, 127.1, 125.5, 124.3, 50.8, 46.8, 34.2, 21.7, 21.7 ppm.

**Mp.:** 56 – 60 °C; **HRMS-ESI**  $m/z$  calculated for  $\text{C}_{23}\text{H}_{24}\text{N}_2\text{O}_4\text{S}_2$   $[\text{M}]^+$  456.1172, found 456.1136.

$[\alpha]_D^{25} = -18.2$  ( $c = 0.98$ ,  $\text{CHCl}_3$ ).

#### ***N*-(2-Azido-1-(2,5-dioxopyrrolidin-1-yl)ethyl)-4-methylbenzensulfonamide (2l)**

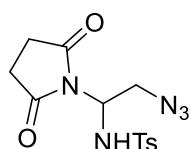

Azide **1l** (66 mg, 1 equiv., 0.20 mmol) and NIS (90 mg, 2 equiv., 0.40 mmol) were dissolved in DCM (2.0 mL) under inert atmosphere. The reaction mixture was stirred at room temperature with white Kessil lamp irradiation for 24 h following the general procedure. The crude was concentrated under reduced pressure and purified by flash chromatography eluting with DCM/EtOAc (9:1) to obtain compound **2l** as a white solid (37 mg, 55%).

$^1\text{H}$  NMR (400 MHz,  $\text{CDCl}_3$ )  $\delta$  7.70 ( $\text{A}_2\text{X}_2$ , part A,  $J_{\text{AX}} = 8.2$  Hz, 2H), 7.31 ( $\text{A}_2\text{X}_2$ , part A,  $J_{\text{XA}} = 8.2$  Hz, 2H), 6.16 (d,  $J = 11.4$  Hz, 1H), 5.51 (ddd,  $J = 11.4, 8.4, 6.2$  Hz, 1H), 3.67 – 3.56 (m, 2H), 2.44 (s, 3H), 2.30 (s, 4H) ppm.

$^{13}\text{C}\{^1\text{H}\}$  NMR (101 MHz,  $\text{CDCl}_3$ )  $\delta$  176.1, 144.4, 136.8, 129.9, 127.4, 60.2, 51.4, 27.9, 21.7 ppm.

**Mp.:** 150 – 154 °C; **HRMS-ESI**  $m/z$  calculated for  $\text{C}_{13}\text{H}_{15}\text{N}_5\text{O}_4\text{S}$   $[\text{M}+\text{Na}]^+$  360.0737, found 360.0737.

#### ***N*-(2-((*tert*-Butyldiphenylsilyl)oxy)-1-(2,5-dioxopyrrolidin-1-yl)ethyl)-4-methylbenzensulfonamide (2m)**

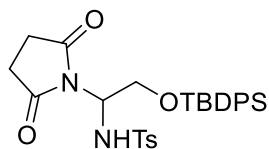

Compound **1m** (109 mg, 1 equiv., 0.20 mmol) and NIS (90 mg, 2 equiv., 0.40 mmol) were dissolved in DCM (2.0 mL) under inert atmosphere. The reaction mixture was stirred at room temperature with white Kessil lamp irradiation for 24 h following the general procedure. The crude was concentrated under reduced pressure and purified by flash chromatography eluting with DCM/EtOAc (98:2) to obtain compound **2m** as a yellowish oil (23 mg, 21%).

DCM/EtOAc (98:2) to obtain compound **2m** as a yellowish oil (23 mg, 21%).

$^1\text{H}$  NMR (400 MHz,  $\text{CDCl}_3$ )  $\delta$  7.66 ( $\text{A}_2\text{X}_2$ , part A,  $J_{\text{AX}} = 8.1$  Hz, 2H), 7.58 – 7.49 (m, 4H), 7.47 – 7.31 (m, 6H), 7.26 (d,  $J = 8.1$  Hz, 1H), 6.03 (d,  $J = 11.4$  Hz, 1H), 5.55 (ddd,  $J = 11.4, 8.4, 5.7$  Hz, 1H), 4.12 – 3.57 (m, 2H), 2.41 (s, 3H), 2.14 (bs, 4H), 0.97 (s, 9H) ppm.

$^{13}\text{C}\{^1\text{H}\}$  NMR (101 MHz,  $\text{CDCl}_3$ )  $\delta$  176.2, 143.9, 137.1, 135.6, 135.5, 132.7, 132.5, 130.2, 130.1, 129.7, 128.0, 127.9, 127.3, 62.6, 61.9, 27.8, 26.7, 21.6, 19.1 ppm.

**HRMS-ESI**  $m/z$  calculated for  $\text{C}_{29}\text{H}_{34}\text{N}_2\text{O}_5\text{SSi}$   $[\text{M}+\text{H}]^+$  551.2030, found 551.2031.

#### **Ethyl-2-(2,5-dioxopyrrolidin-1-yl)-2-((4-methylphenyl)sulfonamido) acetate (2n)**

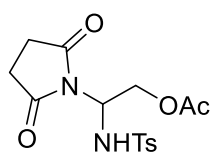

Compound **1n** (70 mg, 1 equiv., 0.20 mmol) and NIS (90 mg, 2 equiv., 0.40 mmol) were dissolved in DCM (2.0 mL) under inert atmosphere. The reaction mixture was stirred at room temperature with white Kessil lamp irradiation for 24 h following the general procedure. The crude was concentrated under reduced pressure and

purified by flash chromatography eluting with DCM/EtOAc (9:1) to obtain compound **2n** as a white solid (46 mg, 64%).

**<sup>1</sup>H NMR** (400 MHz, CDCl<sub>3</sub>) δ 7.69 (d, *J* = 8.1 Hz, 2H), 7.30 (d, *J* = 8.1 Hz, 2H), 6.27 (d, *J* = 11.4 Hz, 1H), 5.58 (ddd, *J* = 11.4, 7.4, 5.5 Hz, 1H), 4.39 (dd, *J* = 11.4, 5.5 Hz, 1H), 4.22 (dd, *J* = 11.4, 7.4 Hz, 1H), 2.42 (s, 3H), 2.27 (s, 4H), 1.97 (s, 3H) ppm.

**<sup>13</sup>C{<sup>1</sup>H} NMR** (101 MHz, CDCl<sub>3</sub>) δ 176.2, 170.5, 144.3, 137.0, 129.8, 127.4, 62.4, 60.0, 27.9, 21.7, 20.6 ppm.

**Mp.:** 183 – 186 °C; **HRMS-ESI** *m/z* calculated for C<sub>15</sub>H<sub>18</sub>N<sub>2</sub>O<sub>6</sub>S [M+H]<sup>+</sup> 355.0958, found 355.0953.

#### ***N*-(2-Bromo-1-(2,5-dioxopyrrolidin-1-yl)ethyl)-4-methylbenzensulfonamide (2o)**

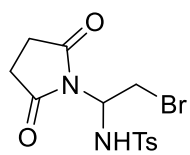

Brominated compound **1o** (74 mg, 1 equiv., 0.20 mmol) and NIS (90 mg, 2 equiv., 0.40 mmol) were dissolved in DCM (2.0 mL) under inert atmosphere. The reaction mixture was stirred at room temperature with white Kessil lamp irradiation for 24 h following the general procedure. The crude was concentrated under reduced pressure and purified by flash chromatography eluting with DCM/EtOAc (9:1) to obtain compound **2o** as a white solid (47 mg, 65%).

**<sup>1</sup>H NMR** (400 MHz, CDCl<sub>3</sub>) δ 7.69 (A<sub>2</sub>X<sub>2</sub>, part A, *J*<sub>AX</sub> = 8.2 Hz, 2H), 7.31 (A<sub>2</sub>X<sub>2</sub>, part A, *J*<sub>XA</sub> = 8.2 Hz, 2H), 6.11 (d, *J* = 11.2 Hz, 1H), 5.59 (ddd, *J* = 11.2, 9.5, 5.6 Hz, 1H), 3.71 (dd, *J* = 10.7, 9.5 Hz, 1H), 3.62 (dd, *J* = 10.7, 5.6 Hz, 1H), 2.44 (s, 3H), 2.32 (s, 4H) ppm.

**<sup>13</sup>C{<sup>1</sup>H} NMR** (101 MHz, CDCl<sub>3</sub>) δ 175.9, 144.4, 136.6, 129.9, 127.5, 61.1, 29.6, 27.8, 21.7 ppm.

**Mp.:** 145 – 148 °C; **HRMS-ESI** *m/z* calculated for C<sub>13</sub>H<sub>15</sub>BrN<sub>2</sub>O<sub>4</sub>S [M+Na]<sup>+</sup> 396.9828/398.9808, found 396.9824/398.9802.

#### ***N*-(2-(1,1-Dioxo-3-oxobenzo[*d*]isothiazol-2(3H)-yl)-1-(2,5-dioxopyrrolidin-1-yl)ethyl)-4-methylbenzensulfonamide (2p)**

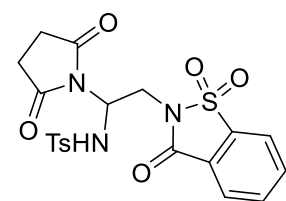

Compound **1p** (95 mg, 1 equiv., 0.20 mmol) and NIS (90 mg, 2 equiv., 0.40 mmol) were dissolved in DCM (2.0 mL) under inert atmosphere. The reaction mixture was stirred at room temperature with white Kessil lamp irradiation for 24 h following the general procedure. The crude was concentrated under reduced pressure and purified by flash chromatography eluting with DCM/EtOAc (95:5) to obtain compound **2p** as a white solid (42 mg, 44%).

**<sup>1</sup>H NMR** (400 MHz, CD<sub>3</sub>COCD<sub>3</sub>) δ 8.20 – 7.95 (m, 4H), 7.68 (A<sub>2</sub>X<sub>2</sub>, part A, *J*<sub>AX</sub> = 8.3 Hz, 2H), 7.45 – 7.36 (m, 3H), 5.86 (ddd, *J* = 10.6, 9.7, 4.7 Hz, 1H), 4.26 (dd, *J* = 14.9, 9.7 Hz, 1H), 4.05 (dd, *J* = 14.9, 4.7 Hz, 1H), 2.42 (s, 3H), 2.31 – 2.13 (m, 4H) ppm.

**<sup>13</sup>C{<sup>1</sup>H} NMR** (101 MHz, CD<sub>3</sub>COCD<sub>3</sub>) δ 176.5, 158.9, 144.0, 137.8, 137.3, 135.9, 135.2, 129.6, 126.9, 126.3, 125.2, 121.3, 58.2, 39.7, 27.5, 20.5 ppm.

**Mp.:** 219 – 224 °C; **HRMS-ESI** *m/z* calculated for C<sub>20</sub>H<sub>19</sub>N<sub>3</sub>O<sub>7</sub>S<sub>2</sub> [M+H]<sup>+</sup> 478.0737, found 478.0701.

**2-(2,5-Dioxopyrrolidin-1-yl)-2-((4-methylphenyl)sulfonamido)ethyl isobutylphenylpropanoate (2q)**

**(2S)-2-(4-**

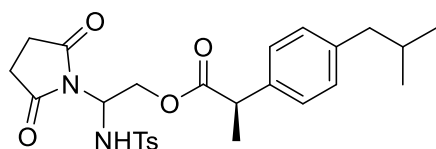

Compound **1q** (100 mg, 1 equiv., 0.20 mmol) and NIS (90 mg, 2 equiv., 0.40 mmol) were dissolved in DCM (2.0 mL) under inert atmosphere. The reaction mixture was stirred at room temperature with white Kessil lamp irradiation for 24 h following the general procedure. The crude was concentrated under reduced pressure and purified by flash chromatography eluting with DCM/EtOAc (95:5) to obtain compound **2q** as a white solid (73 mg, 71% (1:1 *dr*)).

**<sup>1</sup>H NMR** (400 MHz, CDCl<sub>3</sub>) δ 7.74 – 7.54 (m, 4H, 2 diastereomers), 7.33 – 7.22 (m, 5H, 2 diastereomers), 7.15 – 6.97 (m, 8H, 2 diastereomers), 6.17 (d, *J* = 9.4 Hz, 1H), 6.14 (d, *J* = 9.3 Hz, 1H), 5.68 – 5.39 (m, 2H, 2 diastereomers), 4.42 – 4.30 (m, 2H), 4.29 – 4.17 (m, 2H), 3.70 – 3.44 (m, 2H, 2 diastereomers), 2.47 – 2.32 (m, 10H, 2 diastereomers), 2.09 (bs, 4H), 1.99 – 1.88 (m, 4H), 1.89 – 1.73 (m, 2H, 2 diastereomers), 1.42 (d, *J* = 6.2 Hz, 3H), 1.41 (d, *J* = 6.1 Hz, 3H), 0.92 – 0.84 (m, 12 H, 2 diastereomers) ppm.

**<sup>13</sup>C{<sup>1</sup>H} NMR** (101 MHz, CDCl<sub>3</sub>) δ 176.0, 174.0, 174.0, 144.2, 140.9, 137.5, 137.0, 137.0, 136.9, 129.8, 129.5, 129.5, 127.4, 127.3, 127.3, 62.3, 61.9, 59.6, 59.5, 45.1, 45.1, 44.9, 44.9, 44.9, 30.3, 27.7, 27.6, 22.5, 22.5, 21.7, 21.7, 18.6, 18.1 ppm.

**Mp.:** 139 – 143 °C; **HRMS-ESI** *m/z* calculated for C<sub>26</sub>H<sub>32</sub>N<sub>2</sub>O<sub>6</sub>S [M+H]<sup>+</sup> 501.2054, found 501.2024.

**Ethyl 2-(1,3-dioxoisindolin-2-yl)-2-((4methylphenyl)sulfonamido)acetate (2aa)**

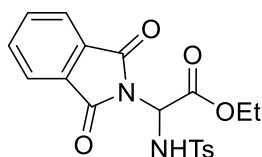

Compound **1a** (70 mg, 1 equiv., 0.20 mmol) and *N*-Iodophtalimide (110 mg, 2 equiv., 0.40 mmol) were dissolved in DCM (2.0 mL) under inert atmosphere. The reaction mixture was stirred at room temperature with white Kessil lamp irradiation for 24 h following the general procedure. The crude was concentrated under reduced pressure and purified by flash chromatography elutin with DCM/EtOAc (96:4) to obtain compound **2aa** as a white solid (58 mg, 71%).

**<sup>1</sup>H NMR** (400 MHz, CDCl<sub>3</sub>) δ 7.79 – 7.67 (m, 4H), 7.65 (d, *J* = 8.0 Hz, 2H), 7.03 (d, *J* = 8.0 Hz, 2H), 6.44 (d, *J* = 8.8 Hz, 1H), 6.02 (d, *J* = 8.8 Hz, 1H), 4.22 (q, *J* = 7.1 Hz, 2H), 2.11 (s, 3H), 1.19 (t, *J* = 7.1 Hz, 3H) ppm.

**<sup>13</sup>C{<sup>1</sup>H} NMR** (101 MHz, CDCl<sub>3</sub>) δ 166.2, 165.4, 143.8, 136.6, 134.5, 131.3, 129.6, 127.3, 123.8, 63.7, 58.1, 21.4, 14.0 ppm.

**Mp.:** 140 – 144 °C; **HRMS-ESI** *m/z* calculated for C<sub>19</sub>H<sub>18</sub>N<sub>2</sub>O<sub>6</sub>S [M+H]<sup>+</sup> 403.0958, found 403.0956.

**Ethyl 2-(5-bromo-1,3-dioxoisindolin-2-yl)-2-((4-methylphenyl)sulfonamido)acetate (2ab)**

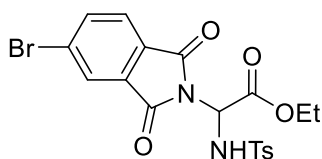

Compound **1a** (70 mg, 1 equiv., 0.20 mmol) and 5-bromo-2-iodoisindoline-1,3-dione (142 mg, 2 equiv., 0.40 mmol) were dissolved in DCM (2.0 mL) under inert atmosphere. The reaction mixture was stirred at room temperature with white Kessil lamp irradiation for 24 h following the general procedure. The crude was concentrated under reduced pressure



and purified by flash chromatography eluting with DCM/EtOAc (98:2) to obtain compound **2ab** as a white solid (82 mg, 85%).

**<sup>1</sup>H NMR** (400 MHz, CDCl<sub>3</sub>) δ 7.97 – 7.78 (m, 2H), 7.68 – 7.61 (m, 3H), 7.07 (d, *J* = 8.0 Hz, 2H), 6.43 (d, *J* = 7.9 Hz, 1H), 5.99 (d, *J* = 7.9 Hz, 1H), 4.22 (q, *J* = 7.1 Hz, 2H), 2.18 (s, 3H), 1.19 (t, *J* = 7.1 Hz, 3H) ppm.

**<sup>13</sup>C{<sup>1</sup>H} NMR** (101 MHz, CDCl<sub>3</sub>) δ 165.4, 165.1, 164.8, 144.0, 137.6, 136.6, 132.9, 129.9, 129.7, 129.5, 127.4, 127.1, 125.2, 63.8, 58.2, 21.4, 14.0 ppm.

**Mp.:** 143 – 147 °C; **HRMS-ESI** *m/z* calculated for C<sub>19</sub>H<sub>17</sub>BrN<sub>2</sub>O<sub>6</sub>S [M+H]<sup>+</sup> 481.0063, found 481.0070.

#### Ethyl 2-(3-ethyl-3-methyl-2,5-dioxopyrrolidin-1-yl)-2-((4-methylphenyl)sulfonamido)acetate (**2ac**)

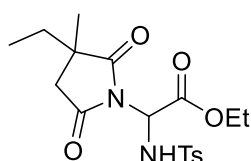

Compound **1a** (70 mg, 1 equiv., 0.20 mmol) and 3-ethyl-1-iodo-3-methylpyrrolidine-2,5-dione (103 mg, 2 equiv., 0.40 mmol) were dissolved in DCM (2.0 mL) under inert atmosphere. The reaction mixture was stirred at room temperature with white Kessil lamp irradiation for 24 h following the general procedure. The crude was concentrated under reduced pressure and purified by

flash chromatography eluting with DCM/EtOAc (98:2) to obtain compound **2ac** as a white solid (61 mg, 78% (1:1 *d.r.*)).

**<sup>1</sup>H NMR** (400 MHz, CDCl<sub>3</sub>) δ 7.76 (A<sub>2</sub>X<sub>2</sub>, part A, *J*<sub>AX</sub> = 8.2 Hz, 4H, 2 diastereomers), 7.30 (d, *J* = 8.2 Hz, 4H, 2 diastereomers), 6.19 (d, *J* = 8.0 Hz, 2H, 2 diastereomers), 5.79 (d, *J* = 8.0 Hz, 1H), 5.79 (d, *J* = 8.0 Hz, 1H), 4.31 – 4.07 (m, 4H, 2 diastereomers), 2.55 (d, *J* = 18.1 Hz, 1H), 2.47 (d, *J* = 18.3 Hz, 1H), 2.41 (s, 6H, 2 diastereomers), 2.28 (d, *J* = 18.3 Hz, 1H), 2.21 (d, *J* = 18.1 Hz, 1H), 1.67 – 1.55 (m, 2H, 2 diastereomers), 1.56 – 1.44 (m, 2H, 2 diastereomers), 1.25 – 1.16 (m, 6H, 2 diastereomers), 1.16 (s, 3H, CH<sub>3</sub>), 1.11 (s, 3H), 0.88 – 0.64 (m, 6H, 2 diastereomers) ppm.

**<sup>13</sup>C{<sup>1</sup>H} NMR** (101 MHz, CDCl<sub>3</sub>) δ 181.1, 180.9, 174.4, 174.2, 165.2, 165.2, 144.3, 144.3, 136.8, 136.7, 129.9, 127.6, 63.7, 58.3, 58.3, 44.3, 44.2, 40.4, 40.3, 31.0, 30.7, 23.4, 23.4, 21.7, 14.0, 8.6 ppm.

**Mp.:** 131 – 135 °C; **HRMS-ESI** *m/z* calculated for C<sub>18</sub>H<sub>24</sub>N<sub>2</sub>O<sub>6</sub>S [M+H]<sup>+</sup> 397.1428, found 397.1424.

#### Ethyl 2-(5,5-dimethyl-2,4-dioxooxazolidin-3-yl)-2-((4-methylphenyl)sulfonamido)acetate (**2ad**)

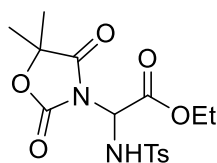

Compound **1a** (70 mg, 1 equiv., 0.20 mmol) and 3-iodo-5,5-dimethyloxazolidine-2,4-dione (103 mg, 2 equiv., 0.40 mmol) were dissolved in DCM (2.0 mL) under inert atmosphere. The reaction mixture was stirred at room temperature with white Kessil lamp irradiation for 24 h following the general procedure. The crude was concentrated under reduced pressure and purified by flash chromatography

eluting with DCM/EtOAc (98:2) to obtain compound **2ad** as a white solid (61 mg, 78%).

**<sup>1</sup>H NMR** (400 MHz, CDCl<sub>3</sub>) δ 7.78 (A<sub>2</sub>X<sub>2</sub>, part A, *J*<sub>AX</sub> = 8.4 Hz, 2H), 7.32 (A<sub>2</sub>X<sub>2</sub>, part X, *J*<sub>XA</sub> = 8.4 Hz, 2H), 6.27 (d, *J* = 7.6 Hz, 1H), 5.73 (d, *J* = 7.6 Hz, 1H), 4.36 – 4.11 (m, 2H), 2.41 (s, 3H), 1.44 (s, 3H), 1.41 (s, 3H), 1.23 (t, *J* = 7.2 Hz, 3H) ppm.

**<sup>13</sup>C{<sup>1</sup>H} NMR** (101 MHz, CDCl<sub>3</sub>) δ 174.2, 164.3, 152.5, 144.1, 136.4, 130.1, 127.6, 84.5, 64.2, 59.5, 23.2, 23.0, 21.7, 14.0 ppm.

**Mp.:** 88 – 92 °C; **HRMS-ESI** *m/z* calculated for C<sub>16</sub>H<sub>20</sub>N<sub>2</sub>O<sub>7</sub>S [M+Na]<sup>+</sup> 407.0883, found 407.0879.

**Ethyl 2-(4,4-dimethyl-2,5-dioxoimidazolidin-1-yl)-2-((4-methylphenyl)sulfonamido)acetate (2ae)**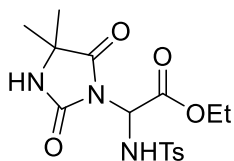

Compound **1a** (70 mg, 1 equiv., 0.20 mmol) and 1,3-Diiodo-5,5-dimethyl hydantoin (102 mg, 2 equiv., 0.40 mmol) were dissolved in DCM (2.0 mL) under inert atmosphere. The reaction mixture was stirred at room temperature with white Kessil lamp irradiation for 24 h following the general procedure. The crude was concentrated under reduced pressure and purified by flash chromatography eluting with DCM/EtOAc (8:2). The fraction containing the product was concentrated, redissolved in EtOAc, extracted with H<sub>2</sub>O (3 x 5 mL) and dried over anhydrous MgSO<sub>4</sub>. The solvent was removed under reduced pressure to obtain compound **2ae** as a white solid (60 mg, 78%).

**<sup>1</sup>H NMR** (400 MHz, CD<sub>3</sub>COCD<sub>3</sub>) δ 7.78 (A<sub>2</sub>X<sub>2</sub>, part A, *J*<sub>AX</sub> = 8.1 Hz, 2H), 7.57 (d, *J* = 8.5 Hz), 7.37 (A<sub>2</sub>X<sub>2</sub>, part X, *J*<sub>XA</sub> = 8.1 Hz, 2H), 7.29 (s, 1H), 5.89 (d, *J* = 8.7 Hz, 1H), 4.33 – 4.05 (m, 2H), 2.40 (s, 3H), 1.24 – 1.09 (m, 9H) ppm.

**<sup>13</sup>C{<sup>1</sup>H} NMR** (101 MHz, CD<sub>3</sub>COCD<sub>3</sub>) δ 176.4, 166.2, 154.4, 144.3, 139.5, 130.4, 127.9, 63.5, 59.5, 59.1, 24.6, 24.5, 21.4, 14.2 ppm.

**Mp.:** 154 – 158 °C; **HRMS-ESI** *m/z* calculated for C<sub>16</sub>H<sub>21</sub>N<sub>3</sub>O<sub>6</sub>S [M+H]<sup>+</sup> 384.1224, found 384.1221.

**Ethyl 2-(2,5-dioxo-4,4-diphenylimidazolidin-1-yl)-2-((4-methylphenyl)sulfonamido)acetate (2af)**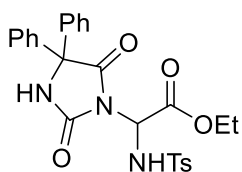

Compound **1a** (70 mg, 1 equiv., 0.20 mmol) and 3-Iodo-5,5-diphenylimidazolidine-2,4-dione (152 mg, 2 equiv., 0.40 mmol) were dissolved in DCM (2.0 mL) under inert atmosphere. The reaction mixture was stirred at room temperature with white Kessil lamp irradiation for 24 h following the general procedure. The crude was concentrated under reduced pressure and purified by flash chromatography eluting with DCM/EtOAc (95:5) to obtain compound **2af** as a white solid (86 mg, 84%).

**<sup>1</sup>H NMR** (400 MHz, CDCl<sub>3</sub>) δ 7.67 (A<sub>2</sub>X<sub>2</sub>, part A, *J*<sub>AX</sub> = 8.1 Hz, 2H), 7.37 – 7.27 (m, 8H), 7.25 – 7.19 (m, 2H), 7.02 (d, *J* = 8.1 Hz, 2H), 6.94 (s, 1H), 6.40 (d, *J* = 7.8 Hz, 1H), 5.92 (d, *J* = 7.8 Hz, 1H), 4.29 – 4.05 (m, 2H), 2.29 (s, 3H), 1.09 (t, *J* = 7.1 Hz, 3H) ppm.

**<sup>13</sup>C{<sup>1</sup>H} NMR** (101 MHz, CDCl<sub>3</sub>) δ 172.0, 165.2, 154.6, 144.0, 138.6, 138.2, 136.7, 129.8, 128.9, 128.9, 128.9, 128.9, 127.2, 127.1, 127.0, 70.4, 63.8, 59.0, 21.7, 13.9 ppm.

**Mp.:** 153 – 157 °C; **HRMS-ESI** *m/z* calculated for C<sub>26</sub>H<sub>25</sub>N<sub>3</sub>O<sub>6</sub>S [M+H]<sup>+</sup> 508.1537, found 508.1536.

**Ethyl 2-(3-(1,3-dioxoisindolin-2-yl)-2,6-dioxopiperidin-1-yl)-2-((4-methylphenyl)sulfonamido)acetate (2ag)**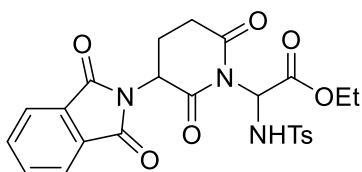

Compound **1a** (70 mg, 1 equiv., 0.20 mmol) and *N*-iodothalidomide (154 mg, 2 equiv., 0.40 mmol) were dissolved in DCM (2.0 mL) under inert atmosphere. The reaction mixture was stirred at room temperature with white Kessil lamp irradiation for 24 h following the general procedure. The crude was concentrated under reduced pressure and purified by flash chromatography eluting with DCM/EtOAc (9:1) to obtain compound **2ag** as a white solid (93 mg, 93% (56:44 *d.r.*)).

**<sup>1</sup>H NMR** (400 MHz, CDCl<sub>3</sub>) δ 7.92 – 7.84 (m, 4H, 2 diastereomers), 7.81 – 7.67 (m, 8H, 2 diastereomers), 7.39 – 7.31 (m, 4H, 2 diastereomers), 6.52 – 6.45 (m, 2H, 2 diastereomers), 6.22 (d, *J* = 9.6 Hz, 1H), 6.16 (d, *J* = 8.8 Hz, 1H), 4.69 (bs, 2H, 2 diastereomers), 4.28 – 4.00 (m, 4H, 2 diastereomers), 2.98 – 2.86 (m, 1H), 2.81 – 2.67 (m, 2H), 2.61 – 2.41 (m, 9H), 2.07 – 1.91 (m, 2H), 1.34 – 1.17 (m, 6H, 2 diastereomers) ppm.

**<sup>13</sup>C{<sup>1</sup>H} NMR** (101 MHz, CDCl<sub>3</sub>) δ 168.1 (bs), 167.1, 167.1, 165.7, 165.6, 144.2 (bs), 137.1, 137.1, 134.6, 134.6, 131.8, 130.0, 129.9, 127.7 (bs), 127.4, 123.9, 123.9, 63.5, 63.3, 59.9, 59.7, 49.8, 49.7, 31.8, 31.6, 21.7, 21.7 (bs), 21.5, 14.0, 13.9 ppm.

**Mp.:** 90 – 94 °C; **HRMS-ESI** *m/z* calculated for C<sub>24</sub>H<sub>23</sub>N<sub>3</sub>O<sub>8</sub>S [M+H]<sup>+</sup> 514.1279, found 514.1274.

### 4.3 Derivatization products

#### *N*-(1-(2,5-Dioxopyrrolidin-1-yl)-2-(phenylthio)ethyl)-4-methylbenzenesulfonamide (2ba)

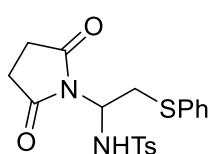

Brominated compound **1o** (50 mg, 1 equiv., 0.13 mmol) and imidazole (9 mg, 1 equiv., 0.13 mmol) were dissolved in DMF (0.8 mL) under inert atmosphere. Then, thiophenol (15 μL, 1.1 equiv., 0.15 mmol) was added to the mixture and the reaction was stirred at 60 °C for 3 h. Crude mixture was concentrated under reduced pressure and purified by flash chromatography eluting with DCM/EtOAc (9:1). Fraction containing the product was concentrated under reduced pressure and crystallized with DCM/Hex to finally obtain the desired compound as a white solid (28 mg, 52 %).

**<sup>1</sup>H NMR** (400 MHz, CDCl<sub>3</sub>) δ 7.63 (A<sub>2</sub>X<sub>2</sub>, part A, *J*<sub>AX</sub> = 8.3 Hz, 2H), 7.39 – 7.15 (m, 7H), 6.06 (d, *J* = 11.2 Hz, 1H), 5.50 (ddd, *J* = 11.2, 10.0, 4.6 Hz, 1H), 3.55 (dd, *J* = 14.6, 10.0 Hz, 1H), 3.22 (dd, *J* = 14.6, 4.6 Hz, 1H), 2.40 (s, 3H), 2.08 – 1.79 (m, 4H) ppm.

**<sup>13</sup>C{<sup>1</sup>H} NMR** (101 MHz, CDCl<sub>3</sub>) δ 144.1, 136.9, 133.7, 131.1, 129.8, 129.3, 127.5, 127.4, 61.4, 36.3, 27.7, 21.7 ppm.

**Mp.:** 199 – 203 °C; **HRMS-ESI** *m/z* calculated for C<sub>19</sub>H<sub>20</sub>N<sub>2</sub>O<sub>4</sub>S<sub>2</sub> [M+H]<sup>+</sup> 405.0937, found 405.0940.

#### Ethyl 2-(1-hydroxy-3-oxoisindolin-2-yl)-2-((4-methylphenyl)sulfonamido)acetate (2bb) and ethyl 2-(1-acetoxy-3-oxoisindolin-2-yl)-2-((4-methylphenyl)sulfonamido)acetate (2bc)

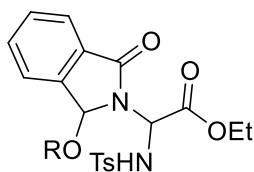

R = H, **2bb**  
R = OAc, **2bc**

Conditions based on reported procedure.<sup>38</sup>

In a round bottom flask, compound **2aa** (45 mg, 1 equiv., 0.11 mmol) was dissolved in AcOH (1.2 mL). Then, Zn powder (56 mg, 7.6 equiv., 0.85 mmol) (previously activated with aqueous HCl 1 M during 5 min) and acetic anhydride (32 μL, 3 equiv., 0.36 mmol) were added and the reaction was stirred at reflux for 24 h. Then, the crude was filtered, washing with DCM (3 x 5 mL). The filtrates were concentrated under reduced pressure and the mixture was purified by flash chromatography eluting with DCM/EtOAc (98:2) to obtain alcohol **2bb** (18 mg,

<sup>38</sup> C. Buchelt, J. Zuber and T. Bach, *Org. Lett.*, 2024, **26**, 7302.

40%) and acetate **2bc** (11 mg, 22%) as white solids. Alcohol **2bb** decomposes in solid or in solution in a few hours.

**2bb:**  $^1\text{H}$  NMR (500 MHz,  $\text{CDCl}_3$ )  $\delta$  7.83 – 7.68 (m, 5H, 2 diastereomers), 7.63 – 7.47 (m, 7H, 2 diastereomers), 7.21 – 7.12 (m, 4H, 2 diastereomers), 6.42 (d,  $J$  = 8.7 Hz, NH), 6.34 (d,  $J$  = 5.5 Hz, NH), 5.93 – 5.84 (m, 3H), 5.57 (d,  $J$  = 8.7 Hz, 1H), 4.27 – 4.16 (m, 4H, 2 diastereomers), 2.87 – 2.68 (m, 2H, 2 diastereomers), 2.28 (s, 6H, 2 diastereomers), 1.25 – 1.16 (m, 6H, 2 diastereomers) ppm.

$^{13}\text{C}\{^1\text{H}\}$  NMR (101 MHz,  $\text{CDCl}_3$ )  $\delta$  167.9, 166.9, 167.0, 166.8, 144.1, 144.0, 143.9, 143.6, 137.0, 135.9, 133.2, 133.1, 130.4, 130.1, 130.1, 129.7, 129.6, 127.5, 127.0, 123.9, 123.7, 123.6, 123.4, 81.8, 80.0, 63.4, 61.2, 59.5, 21.5, 21.4, 14.0, 13.9 ppm.

**2bc:**  $^1\text{H}$  NMR (400 MHz,  $\text{CDCl}_3$ )  $\delta$  7.83 – 7.76 (m, 1H), 7.71 ( $\text{A}_2\text{X}_2$ , part A,  $J_{\text{AX}}$  = 8.3 Hz, 2H), 7.62 – 7.50 (m, 2H), 7.45 – 7.36 (m, 1H), 7.14 – 7.02 ( $\text{A}_2\text{X}_2$ , part X,  $J_{\text{XA}}$  = 8.3 Hz, 2H), 6.75 (s, 1H), 6.20 (d,  $J$  = 6.0 Hz, 1H), 6.09 (d,  $J$  = 6.0 Hz, 1H), 4.31 – 4.06 (m, 2H), 2.21 (s, 3H), 2.08 (s, 3H), 1.21 (t,  $J$  = 7.1 Hz, 3H) ppm.

$^{13}\text{C}\{^1\text{H}\}$  NMR (101 MHz,  $\text{CDCl}_3$ )  $\delta$  171.4, 167.5, 167.3, 144.0, 140.9, 136.5, 133.3, 130.6, 130.5, 129.7, 127.3, 124.3, 124.1, 78.5, 63.3, 60.2, 21.5, 20.9, 14.1 ppm.

**Mp.:** 108 – 112 °C; **HRMS-ESI**  $m/z$  calculated for  $\text{C}_{21}\text{H}_{22}\text{N}_2\text{O}_7\text{S} - \text{C}_2\text{H}_2\text{O}$   $[\text{M}+\text{H}]^+$  405.1115, found 405.1112.

## 5. Mechanistic experiments

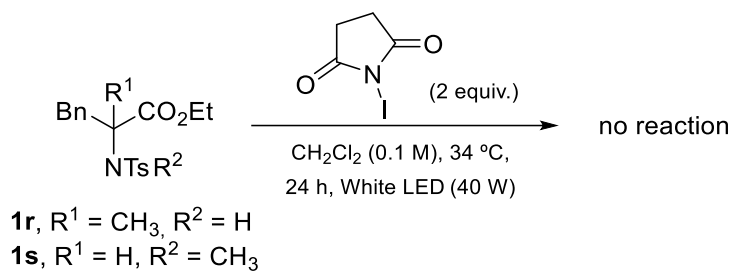

Sulfonamides **1r** and **1s** (50 mg, 1.0 equiv., 0.14 mmol) were treated with NIS (62 mg, 2.0 equiv., 0.28 mmol) in DCM (1.4 mL) following the general procedure, but no reaction was observed.

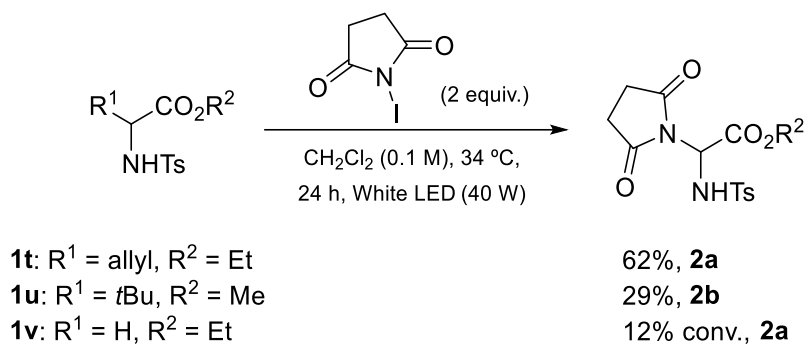

Sulfonamide **1t** (50 mg, 1.0 equiv., 0.17 mmol) was treated with NIS (76 mg, 2.0 equiv., 0.34 mmol) in DCM (1.7 mL) following the general procedure, to obtain **2a** as a white solid (37 mg, 62%).

Sulfonamide **1u** (60 mg, 1.0 equiv., 0.2 mmol) was treated with NIS (90 mg, 2.0 equiv., 0.4 mmol) in DCM (2 mL) following the general procedure, to obtain **2b** as a white solid (20 mg, 29%).

Sulfonamide **1v** (50 mg, 1.0 equiv., 0.19 mmol) was treated with NIS (87 mg, 2.0 equiv., 0.39 mmol) in DCM (1.9 mL) following the general procedure. A 12% conversion rate to the product **2a** was measured by  $^1\text{H}$  NMR.

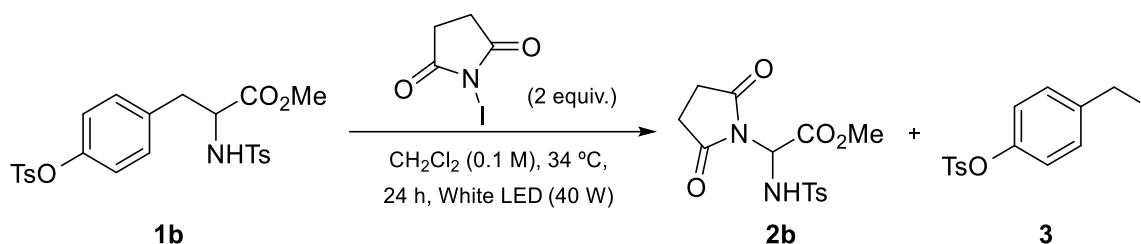

#### 4-(Iodomethyl)phenyl-4-methylbenzenesulfonate (**3**)

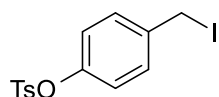

In the conditions described to obtain compound **2b**, benzyl iodide derivative **3** was also isolated as a white solid (49 mg, 63%).

**<sup>1</sup>H NMR** (400 MHz, CDCl<sub>3</sub>) δ 7.70 (A<sub>2</sub>X<sub>2</sub> system 1, part A, *J*<sub>AX</sub> = 8.0 Hz, 2H), 7.32 (A<sub>2</sub>X<sub>2</sub> system 1, part X, *J*<sub>XA</sub> = 8.0 Hz, 2H), 7.28 (A<sub>2</sub>X<sub>2</sub> system 2, part A, *J*<sub>AX</sub> = 8.6 Hz, 2H), 6.91 (A<sub>2</sub>X<sub>2</sub> system 2, part X, *J*<sub>XA</sub> = 8.6 Hz, 2H), 4.39 (s, 2H), 2.45 (s, 3H) ppm.

**<sup>13</sup>C{<sup>1</sup>H} NMR** (101 MHz, CDCl<sub>3</sub>) δ 149.0, 145.6, 138.5, 132.5, 130.2, 129.9, 128.6, 122.9, 21.9, 3.9 ppm.

**Mp.**: 66–68 °C; **HRMS-ESI** *m/z* calculated for C<sub>14</sub>H<sub>13</sub>IO<sub>3</sub>S [M+H]<sup>+</sup> 388.9703, found 388.9697.

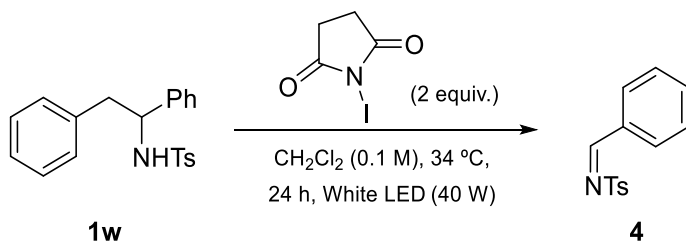

#### N-Benzylidene-4-methylphenylsulfonamide (**4**)

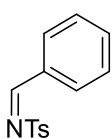

Sulfonamide **1w** (70 mg, 1.0 equiv., 0.2 mmol) and NIS (90 mg, 2.0 equiv., 0.4 mmol) were dissolved in DCM (2.0 mL) under inert atmosphere. The reaction mixture was stirred at room temperature with white Kessil lamp irradiation for 24 h following the general procedure. The solvent was then removed under reduced pressure and the crude product was purified by flash chromatography eluting with Hex/EtOAc (7:3) to obtain imine **4** as a white solid (36 mg, 70%).

**<sup>1</sup>H NMR** (400 MHz, CDCl<sub>3</sub>) δ 9.03 (s, 1H), 7.95 – 7.91 (m, 2H), 7.89 (A<sub>2</sub>X<sub>2</sub> part A, *J*<sub>AX</sub> = 8.1 Hz, 2H), 7.65 – 7.58 (m, 1H), 7.52 – 7.46 (m, 2H), 7.35 (A<sub>2</sub>X<sub>2</sub> part B, *J*<sub>BX</sub> = 8.1 Hz, 2H), 2.44 (s, 3H) ppm.

**<sup>13</sup>C{<sup>1</sup>H} NMR** (101 MHz, CDCl<sub>3</sub>) δ 170.3, 144.8, 135.3, 135.1, 132.6, 131.5, 130.0, 129.3, 128.3, 21.8 ppm.

**Mp.**: 110 – 112 °C.

Characterization data were in agreement with those reported.<sup>39</sup>

<sup>39</sup> M. Pinaud, E. Plantiveau, E. Huet, E. Le Gall and M. Presset, *Eur. J. Org. Chem.*, 2023, **26**, e202300572.

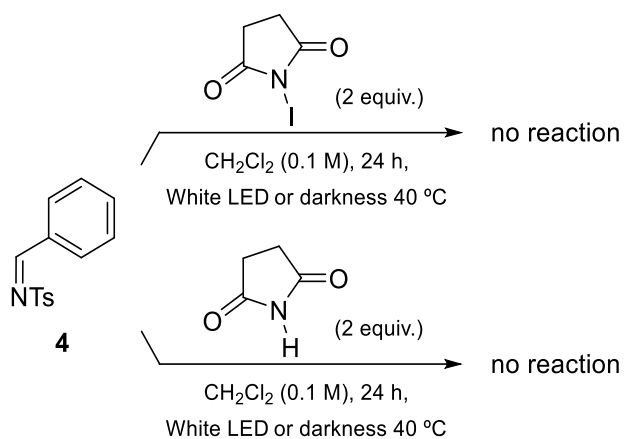

Imine **4** (52 mg, 1.0 eq, 0.2 mmol) and NIS (90 mg, 2.0 eq, 0.28 mmol) or succinimide (40 mg, 2.0 eq, 0.28 mmol) were dissolved in DCM (2 ml) under inert atmosphere. The reaction mixture was stirred at room temperature with white Kessil lamp irradiation following the general procedure or in darkness at 40 °C for 24 h. No conversion to the product was detected by  $^1\text{H}$  NMR.

## 6. DFT studies

All the reported structures were optimized using Density Functional Theory as implemented in Gaussian 16.<sup>40</sup> The geometry optimizations were carried out with the B3LYP functional<sup>41</sup> and with a mixed basis set of LANL2DZ<sup>42</sup> for I and 6-311+G(d,p) basis set for all other atoms at 313.15 K. Solvent effects were considered in all calculations by applying the solvation model based on integral equation formalism polarizable continuum model (IEFPCM),<sup>43</sup> using dichloromethane as the solvent at 313.15 K. The reported energy values correspond to Gibbs Free (G) energies in kcal·mol<sup>-1</sup>. All structures were optimized without geometrical constraints. Stationary points were characterized through frequency calculations (no negative frequency for minima and one negative frequency for transition states).

Several pathways have been calculated for the transformation under investigation. The complete reaction profiles with different species as hydrogen donors to reach the product are shown below. The transition state from the reaction of succinimide and ethyl (Z)-2-(tosylimino)acetate, as an alternative reaction pathway, could not be identified.

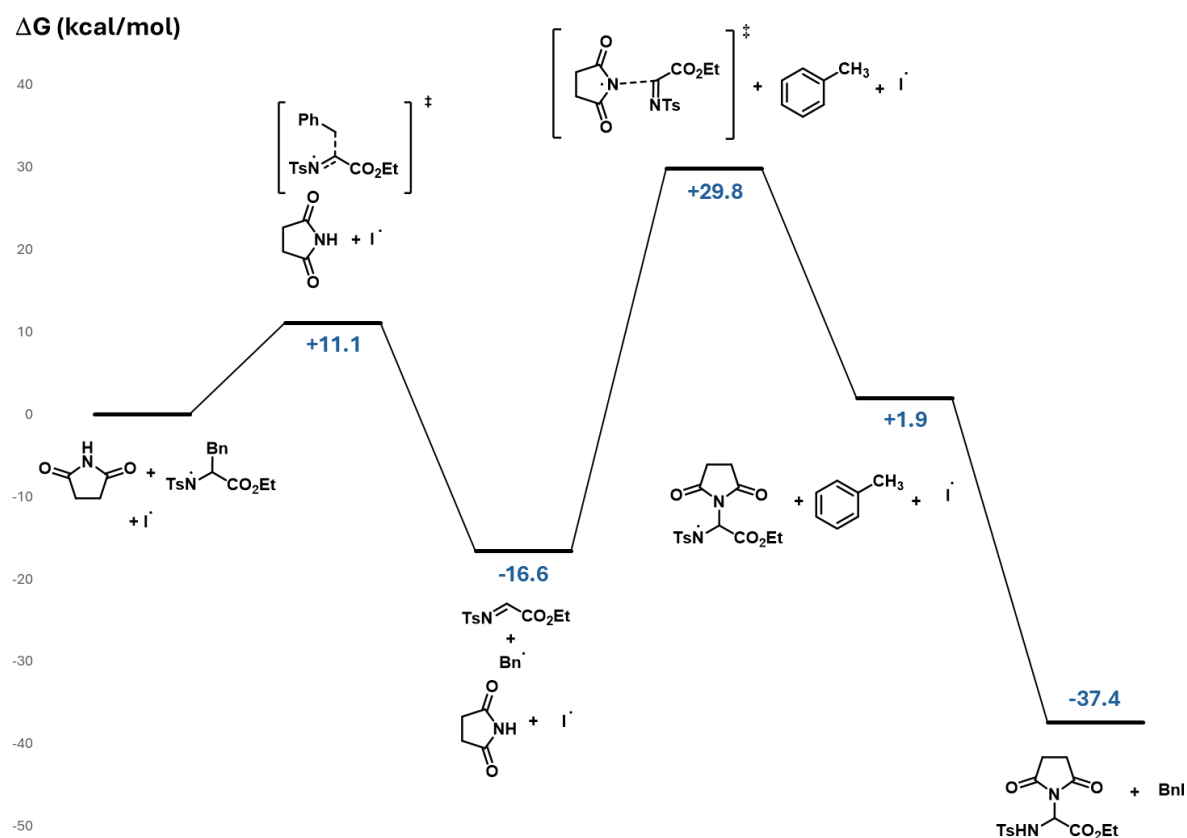

**Figure S5.** Energy profile considering toluene as hydrogen donor.

<sup>40</sup> Gaussian 16, Revision C.01; Frisch, M. J. *et al.* Gaussian, Inc., Wallingford CT, 2016

<sup>41</sup> a) C. Lee, W. Yang, R. G. Parr, *Phys. Rev. B*, 1998, **37**, 785-789; b) W. Kohn, A. D. Becke, R. G. Parr, *J. Phys. Chem.* 1996, **100**, 12974-12980; c) A. D. Becke, *Chem. Phys.* 1993, **98**, 5648.

<sup>42</sup> a) W. R. Wadt, P. J. Hay, *J. Chem. Phys.* 1985, **82**, 270; b) W. R. Wadt, P. J. Hay, *J. Chem. Phys.* 1985, **82**, 284; c) W. R. Wadt, P. J. Hay, *J. Chem. Phys.* 1985, **82**, 299.

<sup>43</sup> a) B. Mennucci, R. Cammi, J. Tomasi, *J. Chem. Phys.* **1998**, *109*, 2798; b) E. Cancès, B. Mennucci, J. Tomasi, *J. Chem. Phys.* 1997, **107**, 3032.



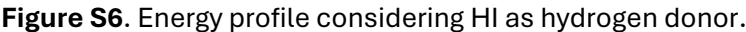CCOC(=O)C(c1ccccc1)Nc2ccc(S(=O)(=O)c3ccccc3)cc2

|   |             |             |             |
|---|-------------|-------------|-------------|
| C | -1.18958200 | 0.66380100  | -0.66253700 |
| C | -0.49133500 | 2.04179700  | -0.71308300 |
| O | 0.62077800  | 2.18317500  | -1.16707300 |
| O | -1.28718800 | 3.03015900  | -0.31284000 |
| C | -0.78149300 | 4.40007700  | -0.41362400 |
| H | -1.68142900 | 4.99799000  | -0.54976000 |
| H | -0.15828100 | 4.47129800  | -1.30423400 |
| C | -0.02782500 | 4.79616700  | 0.84171600  |
| H | 0.86708700  | 4.18646800  | 0.97554400  |
| H | 0.27864100  | 5.84250100  | 0.75863600  |
| H | -0.66091300 | 4.69443000  | 1.72572700  |
| N | -0.24954400 | -0.42250200 | -0.44798800 |
| S | 0.66375300  | -0.39190800 | 1.00200000  |
| O | 0.66748900  | 0.92680600  | 1.65045100  |
| O | 0.15963200  | -1.54582500 | 1.76181600  |
| C | 2.28881300  | -0.75483500 | 0.37583500  |
| C | 3.17688500  | 0.29323300  | 0.13323100  |
| C | 2.64326500  | -2.08306400 | 0.13003300  |
| C | 4.44477400  | -0.00402900 | -0.35274800 |
| H | 2.87740100  | 1.31613800  | 0.31781200  |
| C | 3.91456900  | -2.35647700 | -0.35782800 |
| H | 1.94106600  | -2.88316800 | 0.32578100  |
| H | 4.83451800  | -1.32654500 | -0.60431000 |
| C | 5.14166200  | 0.80466900  | -0.54216700 |
| H | 4.19820100  | -3.38535500 | -0.54913900 |
| C | 6.22091900  | -1.63965400 | -1.10271900 |

|   |             |             |             |
|---|-------------|-------------|-------------|
| H | 6.88916900  | -1.85078500 | -0.26079800 |
| H | 6.22183700  | -2.51980900 | -1.74879400 |
| H | 6.64444400  | -0.79965700 | -1.65609900 |
| C | -2.42406300 | 0.56826400  | 0.29424400  |
| H | -2.08033200 | 0.56842300  | 1.32962900  |
| H | -2.98558200 | 1.49047700  | 0.14238600  |
| C | -3.31289900 | -0.62346500 | 0.01428400  |
| C | -3.18928200 | -1.81225200 | 0.74194600  |
| C | -4.28989400 | -0.54823200 | -0.98632900 |
| C | -4.01875400 | -2.90051100 | 0.47227100  |
| H | -2.43562300 | -1.88846000 | 1.51764800  |
| C | -5.11915400 | -1.63518500 | -1.25941000 |
| H | -4.40883200 | 0.37060200  | -1.55226500 |
| C | -4.98510700 | -2.81647700 | -0.53001700 |
| H | -3.91031100 | -3.81376100 | 1.04682200  |
| H | -5.87215900 | -1.55702200 | -2.03574800 |
| H | -5.63068400 | -3.66225600 | -0.73820900 |
| H | -1.56040600 | 0.51512500  | -1.68341100 |

SCF Done: E(UB3LYP) = -1452.01233373  
Zero-point correction= 0.348246 (Hartree/Particle)  
Thermal correction to Energy= 0.374229  
Thermal correction to Enthalpy= 0.375220  
Thermal correction to Gibbs Free Energy= 0.285650  
Sum of electronic and zero-point Energies= -1451.664088  
Sum of electronic and thermal Energies= -1451.638105  
Sum of electronic and thermal Enthalpies= -1451.637113  
Sum of electronic and thermal Free Energies= -1451.726684

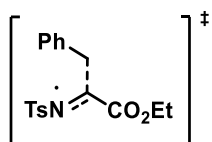

|   |             |             |             |
|---|-------------|-------------|-------------|
| C | -0.96260500 | 0.61729400  | -0.80573200 |
| C | -0.52425500 | 2.09014300  | -0.83957700 |
| O | 0.41619700  | 2.39906300  | -1.53651700 |
| O | -1.31060000 | 2.93143800  | -0.18476800 |
| C | -1.00130300 | 4.36109000  | -0.26615300 |
| H | -1.97161000 | 4.84001000  | -0.14324500 |
| H | -0.61539100 | 4.57185400  | -1.26290000 |
| C | -0.02805500 | 4.77582000  | 0.82047700  |
| H | 0.93442500  | 4.27645200  | 0.70269000  |
| H | 0.13229200  | 5.85574300  | 0.75850100  |
| H | -0.42564800 | 4.54462900  | 1.81069400  |
| N | -0.26705700 | -0.37347100 | -0.28000100 |
| S | 0.74658600  | -0.09034300 | 1.04104200  |
| O | 0.83802900  | 1.34274400  | 1.37602700  |
| O | 0.31374500  | -1.01933400 | 2.09492300  |
| C | 2.32580100  | -0.64000000 | 0.40823400  |
| C | 3.15744800  | 0.27486400  | -0.23661400 |
| C | 2.69427400  | -1.97674700 | 0.55175300  |
| C | 4.37839400  | -0.16388400 | -0.73774300 |
| H | 2.85380200  | 1.30822200  | -0.34509600 |
| C | 3.91941400  | -2.39553700 | 0.04308500  |
| H | 2.03741600  | -2.67242000 | 1.05789600  |
| C | 4.77977400  | -1.50014600 | -0.60601800 |
| H | 5.02917000  | 0.54366200  | -1.23975500 |
| H | 4.21094300  | -3.43430200 | 0.15323400  |
| C | 6.11893700  | -1.95759800 | -1.12486900 |
| H | 6.88576700  | -1.85404300 | -0.34958300 |
| H | 6.09286600  | -3.00809200 | -1.42115000 |
| H | 6.43786500  | -1.36232400 | -1.98263500 |
| C | -2.89291800 | 0.61011200  | 0.18843800  |
| H | -2.48788900 | 0.84672100  | 1.16417800  |
| H | -3.28025600 | 1.45197300  | -0.37152500 |
| C | -3.49202300 | -0.67688300 | -0.01923400 |
| C | -3.23815400 | -1.74886600 | 0.86718500  |
| C | -4.34092600 | -0.90689700 | -1.12732500 |
| C | -3.82077500 | -2.99053900 | 0.65911900  |
| H | -2.57559900 | -1.59136800 | 1.71050100  |
| C | -4.92095600 | -2.15100500 | -1.32988300 |
| H | -4.54425500 | -0.09462300 | -1.81703100 |
| C | -4.66373800 | -3.19713800 | -0.43800200 |
| H | -3.62079500 | -3.80314000 | 1.34794600  |
| H | -5.57553100 | -2.31126900 | -2.17879700 |
| H | -5.11725400 | -4.16863800 | -0.59745000 |
| H | -1.46526300 | 0.34494000  | -1.73330000 |

SCF Done: E(UB3LYP) = -1451.99021702  
 Zero-point correction= 0.345020 (Hartree/Particle)  
 Thermal correction to Energy= 0.371181  
 Thermal correction to Enthalpy= 0.372173  
 Thermal correction to Gibbs Free Energy= 0.281193  
 Sum of electronic and zero-point Energies= -1451.645197  
 Sum of electronic and thermal Energies= -1451.619036  
 Sum of electronic and thermal Enthalpies= -1451.618044  
 Sum of electronic and thermal Free Energies= -1451.709024  
 Frequency= -328.7698

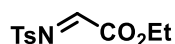

|   |            |             |             |
|---|------------|-------------|-------------|
| C | 1.77946400 | 0.61944500  | 0.12780300  |
| C | 2.96349300 | -0.12524600 | -0.45179600 |
| O | 2.99319100 | -0.62454200 | -1.54883300 |

|   |             |             |             |
|---|-------------|-------------|-------------|
| O | 3.95023900  | -0.12788100 | 0.44507500  |
| C | 5.19938900  | -0.80052100 | 0.08688200  |
| H | 5.95327800  | -0.27019500 | 0.66597900  |
| H | 5.37814100  | -0.64431100 | -0.97639300 |
| C | 5.14623900  | -2.27399900 | 0.44524800  |
| H | 4.38650400  | -2.79807000 | -0.13729700 |
| H | 6.11638600  | -2.72783500 | 0.22645200  |
| H | 4.93762200  | -2.40954000 | 1.50857600  |
| N | 0.73607400  | 0.75299600  | -0.58009200 |
| S | -0.55635000 | 1.66594500  | 0.15038800  |
| O | -0.25084200 | 1.98366700  | 1.55062000  |
| O | -0.81184400 | 2.75305700  | -0.79573800 |
| C | -1.87885200 | 0.47480800  | 0.08850600  |
| C | -2.24141000 | -0.20227900 | 1.25088300  |
| C | -2.52060000 | 0.23361000  | -1.12738600 |
| C | -3.27179300 | -1.13539300 | 1.18778000  |
| H | -1.73318400 | 0.00118700  | 2.18447100  |
| C | -3.54504100 | -0.70350200 | -1.16744000 |
| H | -2.22931000 | 0.77165400  | -2.02041100 |
| C | -3.93802700 | -1.40043100 | -0.01506000 |
| H | -3.56186100 | -1.66381600 | 2.08884100  |
| H | -4.04821400 | -0.89656200 | -2.10833400 |
| C | -5.07012000 | -2.39300500 | -0.07024900 |
| H | -6.03425600 | -1.87395400 | -0.05289900 |
| H | -5.03519300 | -2.98250400 | -0.98912400 |
| H | -5.04484400 | -3.07461400 | 0.78142800  |
| H | 1.88161200  | 1.00715100  | 1.14312100  |

SCF Done: E(RB3LYP) = -1181.02192298  
 Zero-point correction= 0.229012 (Hartree/Particle)  
 Thermal correction to Energy= 0.248148  
 Thermal correction to Enthalpy= 0.249139  
 Thermal correction to Gibbs Free Energy= 0.176066  
 Sum of electronic and zero-point Energies= -1180.792911  
 Sum of electronic and thermal Energies= -1180.773775  
 Sum of electronic and thermal Enthalpies= -1180.772784  
 Sum of electronic and thermal Free Energies= -1180.845857

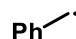

|   |             |             |             |
|---|-------------|-------------|-------------|
| C | -2.40036800 | 0.00000000  | 0.00000900  |
| H | -2.95838500 | 0.92822900  | 0.00003500  |
| H | -2.95838500 | -0.92822900 | 0.00004000  |
| C | -0.99461400 | 0.00000000  | -0.00003800 |
| C | -0.25193300 | 1.21812100  | 0.00000000  |
| C | -0.25193300 | -1.21812100 | 0.00000000  |
| C | 1.13264700  | 1.21124900  | 0.00000300  |
| H | -0.79107700 | 2.15953400  | 0.00000800  |
| C | 1.13264700  | -1.21124900 | 0.00000300  |
| H | -0.79107700 | -2.15953400 | 0.00000800  |
| C | 1.83808200  | 0.00000000  | 0.00000000  |
| H | 1.67498000  | 2.15042900  | 0.00002200  |
| H | 1.67498000  | -2.15042900 | 0.00002100  |
| H | 2.92179100  | 0.00000000  | 0.00000700  |

SCF Done: E(UB3LYP) = -270.989881588  
 Zero-point correction= 0.114093 (Hartree/Particle)  
 Thermal correction to Energy= 0.120346  
 Thermal correction to Enthalpy= 0.121337  
 Thermal correction to Gibbs Free Energy= 0.082563  
 Sum of electronic and zero-point Energies= -270.875789  
 Sum of electronic and thermal Energies= -270.869536  
 Sum of electronic and thermal Enthalpies= -270.868544  
 Sum of electronic and thermal Free Energies= -270.907318

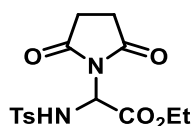

|   |             |             |             |
|---|-------------|-------------|-------------|
| C | -1.34293100 | -0.04268300 | -1.13084700 |
| C | -0.68361400 | 1.35552400  | -1.11323700 |
| O | 0.48904500  | 1.55428400  | -1.29324300 |
| O | -1.63102100 | 2.28839000  | -1.00470600 |
| C | -1.22102500 | 3.69021300  | -1.07522300 |
| H | -2.09389500 | 4.19388400  | -1.48823400 |
| H | -0.39188600 | 3.76823500  | -1.77778300 |
| C | -0.85624300 | 4.23255900  | 0.29355100  |
| H | 0.01069400  | 3.71575500  | 0.70746800  |
| H | -0.61169700 | 5.29430400  | 0.20007200  |
| H | -1.69159200 | 4.13389500  | 0.98971000  |
| N | -0.39536000 | -1.12075400 | -1.37037900 |
| S | 0.51510900  | -1.97856200 | -0.23096600 |
| O | -0.20201200 | -2.06971100 | 1.04340300  |
| O | 0.85644700  | -3.20645000 | -0.95758500 |
| C | 2.00834300  | -1.03734700 | 0.04004900  |
| C | 2.15228100  | -0.30311700 | 1.21221800  |
| C | 3.01967500  | -1.08071700 | -0.92044800 |
| C | 3.33588400  | 0.40147300  | 1.42145600  |
| H | 1.35380200  | -0.27652000 | 1.94126500  |
| C | 4.18998000  | -0.36946000 | -0.69357800 |
| H | 2.89562800  | -1.66208500 | -1.82527800 |
| C | 4.36877200  | 0.38094600  | 0.47901500  |
| H | 3.45324700  | 0.97670200  | 2.33310900  |
| H | 4.97977600  | -0.39904700 | -1.43636900 |
| C | 5.65624300  | 1.12738400  | 0.71845900  |
| H | 6.46767000  | 0.43111200  | 0.95422100  |
| H | 5.95857600  | 1.68724000  | -0.17017200 |
| H | 5.56291400  | 1.82618700  | 1.55116700  |
| H | -0.69848000 | -1.77858100 | -2.07943300 |
| C | -3.22975600 | -0.25966200 | 2.13384100  |
| C | -4.15187300 | -1.01199100 | 1.16426000  |
| H | -2.84846100 | -0.88806000 | 2.94053100  |
| H | -3.70145500 | 0.61161300  | 2.59146900  |
| H | -4.29592200 | -2.06082500 | 1.42974900  |
| H | -5.14105900 | -0.56072400 | 1.06859400  |
| N | -2.26304100 | -0.23424200 | -0.01553100 |
| C | -2.05578900 | 0.20557200  | 1.29636400  |
| C | -3.45540500 | -0.94539700 | -0.17909900 |
| O | -1.09879900 | 0.85431100  | 1.65032000  |
| O | -3.82244100 | -1.40677400 | -1.23734400 |
| H | -1.97780100 | -0.04329900 | -2.02069500 |

SCF Done: E(RB3LYP) = -1541.82118447  
 Zero-point correction= 0.324317 (Hartree/Particle)  
 Thermal correction to Energy= 0.350643  
 Thermal correction to Enthalpy= 0.351635  
 Thermal correction to Gibbs Free Energy= 0.262040  
 Sum of electronic and zero-point Energies= -1541.496867  
 Sum of electronic and thermal Energies= -1541.470542  
 Sum of electronic and thermal Enthalpies= -1541.469550  
 Sum of electronic and thermal Free Energies= -1541.559145

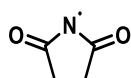

|   |             |            |             |
|---|-------------|------------|-------------|
| C | 0.75217100  | 1.25577200 | 0.00039900  |
| C | -0.75175200 | 1.25575500 | -0.00046400 |
| H | 1.20416700  | 1.69794100 | -0.88753600 |
| H | 1.20277400  | 1.69617000 | 0.88996800  |

|   |             |             |             |
|---|-------------|-------------|-------------|
| H | -1.20367200 | 1.69752800  | 0.88770200  |
| H | -1.20250300 | 1.69608400  | -0.88996700 |
| C | 1.09399200  | -0.26496700 | -0.00031500 |
| C | -1.09445500 | -0.26531300 | 0.00025800  |
| N | 0.00026400  | -1.07022200 | -0.00030900 |
| O | -2.23623200 | -0.69876000 | 0.00026900  |
| O | 2.23593900  | -0.69919700 | 0.00007300  |

SCF Done: E(UB3LYP) = -360.084732992  
 Zero-point correction= 0.074480 (Hartree/Particle)  
 Thermal correction to Energy= 0.081241  
 Thermal correction to Enthalpy= 0.082233  
 Thermal correction to Gibbs Free Energy= 0.041760  
 Sum of electronic and zero-point Energies= -360.010253  
 Sum of electronic and thermal Energies= -360.003492  
 Sum of electronic and thermal Enthalpies= -360.002500  
 Sum of electronic and thermal Free Energies= -360.042973

I'

SCF Done: E(UB3LYP) = -11.3640767848  
 Zero-point correction= 0.000000 (Hartree/Particle)  
 Thermal correction to Energy= 0.001488  
 Thermal correction to Enthalpy= 0.002479  
 Thermal correction to Gibbs Free Energy= -0.018505  
 Sum of electronic and zero-point Energies= -11.364077  
 Sum of electronic and thermal Energies= -11.362589  
 Sum of electronic and thermal Enthalpies= -11.361598  
 Sum of electronic and thermal Free Energies= -11.382582

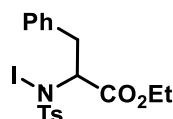

|   |             |             |             |
|---|-------------|-------------|-------------|
| C | -1.15498800 | 1.14605500  | -0.46666900 |
| C | -0.41318000 | 2.47744800  | -0.74215000 |
| O | 0.63881100  | 2.54097200  | -1.33450800 |
| O | -1.12245100 | 3.53342200  | -0.34307000 |
| C | -0.58770500 | 4.86380900  | -0.62577000 |
| H | -1.47598400 | 5.49006500  | -0.69722900 |
| H | -0.08437300 | 4.83520800  | -1.59160100 |
| C | 0.33765000  | 5.32959400  | 0.48279500  |
| H | 1.22446500  | 4.69763100  | 0.55067400  |
| H | 0.66069100  | 6.35288900  | 0.27236900  |
| H | -0.17527000 | 5.32435800  | 1.44695700  |
| N | -0.15396800 | 0.08616900  | -0.20997500 |
| S | 0.71624100  | 0.08256200  | 1.23794200  |
| O | 0.66940200  | 1.48517400  | 1.67704800  |
| O | 0.25454600  | -0.95000100 | 2.17032600  |
| C | 2.37438300  | -0.35128000 | 0.72103100  |
| C | 3.01471600  | 0.42560100  | -0.24544200 |
| C | 3.01580600  | -1.42267300 | 1.33557900  |
| C | 4.32356300  | 0.11428200  | -0.59097300 |
| H | 2.48985600  | 1.24286300  | -0.72523900 |
| C | 4.32918400  | -1.71537000 | 0.97510700  |
| H | 2.49691100  | -2.01675100 | 2.07618700  |
| C | 5.00298900  | -0.95478600 | 0.01335000  |
| H | 4.82610300  | 0.70870100  | -1.34630700 |
| H | 4.83287300  | -2.55102400 | 1.44810700  |
| C | 6.43245300  | -1.25934600 | -0.35473300 |
| H | 7.11460600  | -0.57296400 | 0.15806600  |
| H | 6.70964300  | -2.27595400 | -0.07098800 |
| H | 6.59923900  | -1.14079400 | -1.42780600 |
| C | -2.32624700 | 1.23824800  | 0.53751300  |
| H | -1.93042200 | 1.41193900  | 1.53882100  |
| H | -2.90204900 | 2.12566300  | 0.27078700  |

|   |             |             |             |
|---|-------------|-------------|-------------|
| C | -3.24389700 | 0.03286500  | 0.52892500  |
| C | -3.17665200 | -0.93745800 | 1.53364600  |
| C | -4.20133000 | -0.11878300 | -0.48293800 |
| C | -4.03711400 | -2.03592400 | 1.52440200  |
| H | -2.43928700 | -0.83940500 | 2.32218500  |
| C | -5.06000200 | -1.21598800 | -0.49795700 |
| H | -4.28210400 | 0.63228200  | -1.26329000 |
| C | -4.97966100 | -2.18051300 | 0.50766700  |
| H | -3.96959700 | -2.77799100 | 2.31234800  |
| H | -5.79591000 | -1.31427100 | -1.28844500 |
| H | -5.64966100 | -3.03296700 | 0.50060900  |
| H | -1.57249100 | 0.89432800  | -1.44598500 |
| I | -0.34870900 | -1.74734300 | -1.20105900 |

SCF Done: E(RB3LYP) = -1463.42463665  
 Zero-point correction= 0.350609 (Hartree/Particle)  
 Thermal correction to Energy= 0.378443  
 Thermal correction to Enthalpy= 0.379435  
 Thermal correction to Gibbs Free Energy= 0.285185  
 Sum of electronic and zero-point Energies= -1463.074028  
 Sum of electronic and thermal Energies= -1463.046194  
 Sum of electronic and thermal Enthalpies= -1463.045202  
 Sum of electronic and thermal Free Energies= -1463.139451

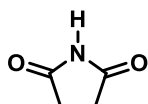

|   |             |             |             |
|---|-------------|-------------|-------------|
| C | 0.76856800  | 1.25686500  | -0.00004400 |
| C | -0.76857000 | 1.25686300  | 0.00004700  |
| H | 1.20113100  | 1.73727100  | -0.87945900 |
| H | 1.20124400  | 1.73739900  | 0.87924300  |
| H | -1.20112200 | 1.73727100  | 0.87946800  |
| H | -1.20126100 | 1.73739400  | -0.87923300 |
| C | 1.16872900  | -0.21025200 | 0.00001800  |
| C | -1.16872600 | -0.21025500 | 0.00000800  |
| N | 0.00000000  | -0.95866300 | 0.00009100  |
| O | -2.28707000 | -0.67663900 | -0.00006900 |
| O | 2.28707100  | -0.67663900 | -0.00003300 |
| H | 0.00000000  | -1.97179700 | -0.00001400 |

SCF Done: E(RB3LYP) = -360.791207425  
 Zero-point correction= 0.091411 (Hartree/Particle)  
 Thermal correction to Energy= 0.097932  
 Thermal correction to Enthalpy= 0.098924  
 Thermal correction to Gibbs Free Energy= 0.058736  
 Sum of electronic and zero-point Energies= -360.699797  
 Sum of electronic and thermal Energies= -360.693276  
 Sum of electronic and thermal Enthalpies= -360.692284  
 Sum of electronic and thermal Free Energies= -360.732471

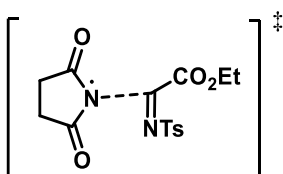

|   |             |            |             |
|---|-------------|------------|-------------|
| C | -0.75070100 | 0.35025700 | -0.87111400 |
| C | -1.44471400 | 1.66754400 | -1.14752200 |
| O | -1.93618600 | 1.88323000 | -2.23235500 |
| O | -1.41224600 | 2.50304500 | -0.12387100 |
| C | -2.03557000 | 3.81188600 | -0.31740000 |
| H | -3.08630000 | 3.65010300 | -0.56416200 |
| H | -1.54907400 | 4.29422000 | -1.16663600 |

|   |             |             |             |
|---|-------------|-------------|-------------|
| C | -1.86052600 | 4.59374700  | 0.96497600  |
| H | -0.80311500 | 4.73481000  | 1.19782300  |
| H | -2.32059000 | 5.57814600  | 0.84878900  |
| H | -2.34140000 | 4.08643100  | 1.80362200  |
| N | 0.10190900  | 0.24572600  | 0.08741400  |
| S | 0.93783900  | -1.27424100 | 0.19371100  |
| O | 0.62467500  | -1.77812000 | 1.53181400  |
| O | 0.66237100  | -2.11389200 | -0.97759700 |
| C | 2.62294400  | -0.70479100 | 0.13086500  |
| C | 3.19082200  | -0.12978800 | 1.27004400  |
| C | 3.34121200  | -0.83184800 | -1.05752400 |
| C | 4.50404300  | 0.31627700  | 1.20839700  |
| H | 2.61928200  | -0.04086600 | 2.18507700  |
| C | 4.65563900  | -0.37936100 | -1.09590000 |
| H | 2.88241100  | -1.28093900 | -1.92881000 |
| C | 5.25716300  | 0.19863100  | 0.02979800  |
| H | 4.95307300  | 0.76246900  | 2.08867600  |
| H | 5.22220500  | -0.47835800 | -2.01485100 |
| C | 6.68953600  | 0.66152600  | -0.01190700 |
| H | 7.34891600  | -0.10278800 | 0.41329900  |
| H | 7.01827700  | 0.85009300  | -1.03511300 |
| H | 6.82880200  | 1.57287400  | 0.57353200  |
| C | -4.33869200 | -2.27778700 | -0.03111000 |
| C | -4.26832500 | -1.59253800 | 1.34494200  |
| H | -5.29127000 | -2.13472400 | -0.54320000 |
| H | -4.14071800 | -3.35070800 | 0.01013600  |
| H | -5.13568800 | -0.96722200 | 1.56241300  |
| H | -4.11962000 | -2.27762300 | 2.18013300  |
| N | -2.65580700 | -0.64387500 | -0.04192100 |
| C | -3.22495900 | -1.62754000 | -0.84781300 |
| C | -3.03159800 | -0.66258000 | 1.28645300  |
| O | -2.89999700 | -1.88901000 | -1.98190600 |
| O | -2.56206100 | -0.06622200 | 2.22176600  |
| H | -0.86341700 | -0.39507100 | -1.66245500 |

SCF Done: E(UB3LYP) = -1541.10453315  
 Zero-point correction= 0.305644 (Hartree/Particle)  
 Thermal correction to Energy= 0.332840  
 Thermal correction to Enthalpy= 0.333832  
 Thermal correction to Gibbs Free Energy= 0.239408  
 Sum of electronic and zero-point Energies= -1540.798889  
 Sum of electronic and thermal Energies= -1540.771693  
 Sum of electronic and thermal Enthalpies= -1540.770701  
 Sum of electronic and thermal Free Energies= -1540.865126  
 Frequency= -137.2587

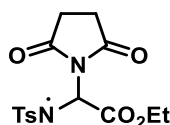

|   |             |             |             |
|---|-------------|-------------|-------------|
| C | -1.40973000 | 0.40931400  | -0.42403700 |
| C | -1.95862400 | 1.81057200  | -0.06064600 |
| O | -3.12007500 | 2.00700400  | 0.19942200  |
| O | -1.01184500 | 2.72964900  | -0.15259700 |
| C | -1.40335500 | 4.11783200  | 0.09957800  |
| H | -1.81618900 | 4.17076700  | 1.10786200  |
| H | -2.18619600 | 4.38024200  | -0.61363100 |
| C | -0.16765500 | 4.97422200  | -0.06098100 |
| H | 0.23690500  | 4.89573500  | -1.07225100 |
| H | -0.43038400 | 6.01894800  | 0.12269900  |
| H | 0.60636700  | 4.68489600  | 0.65273100  |
| N | -0.07327700 | 0.22754000  | 0.10611700  |
| S | 0.67827300  | -1.25711800 | -0.31369600 |
| O | 0.29715000  | -2.23167600 | 0.71441600  |
| O | 0.40988700  | -1.54820500 | -1.72684100 |

|   |             |             |             |
|---|-------------|-------------|-------------|
| C | 2.39430100  | -0.82473900 | -0.12081800 |
| C | 2.96891100  | -0.86363800 | 1.14959900  |
| C | 3.12775400  | -0.43938400 | -1.24169600 |
| C | 4.30618700  | -0.51319100 | 1.28865600  |
| H | 2.38540000  | -1.16798500 | 2.00905200  |
| C | 4.46499400  | -0.09256300 | -1.07905000 |
| H | 2.66429800  | -0.41705700 | -2.21947100 |
| C | 5.07453800  | -0.12402400 | 0.18168200  |
| H | 4.76055100  | -0.54239500 | 2.27266400  |
| H | 5.04258200  | 0.20639500  | -1.94650500 |
| C | 6.53152800  | 0.22351200  | 0.34315000  |
| H | 7.14724400  | -0.68064300 | 0.28775200  |
| H | 6.86917700  | 0.90025500  | -0.44373300 |
| H | 6.72356800  | 0.69045400  | 1.31122400  |
| C | -4.06446900 | -2.23325400 | -0.19408700 |
| C | -3.75527300 | -1.97145100 | 1.28823500  |
| H | -5.10170100 | -2.02995400 | -0.46427300 |
| H | -3.83936400 | -3.25548500 | -0.50504800 |
| H | -4.61027800 | -1.57923900 | 1.84173500  |
| H | -3.39740800 | -2.85485500 | 1.81952500  |
| N | -2.35043000 | -0.62551700 | -0.03927000 |
| C | -3.16533600 | -1.29003200 | -0.96673700 |
| C | -2.65917100 | -0.92525300 | 1.29436700  |
| O | -3.11910500 | -1.10252500 | -2.15982100 |
| O | -2.11652000 | -0.40873600 | 2.24193800  |
| H | -1.36451500 | 0.36802000  | -1.52455100 |

SCF Done: E(UB3LYP) = -1541.15602041  
Zero-point correction= 0.310337 (Hartree/Particle)  
Thermal correction to Energy= 0.336763  
Thermal correction to Enthalpy= 0.337755  
Thermal correction to Gibbs Free Energy= 0.246405  
Sum of electronic and zero-point Energies= -1540.845684  
Sum of electronic and thermal Energies= -1540.819257  
Sum of electronic and thermal Enthalpies= -1540.818265  
Sum of electronic and thermal Free Energies= -1540.909615

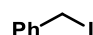

|   |             |             |             |
|---|-------------|-------------|-------------|
| C | 3.06018200  | 1.20728700  | -0.26915400 |
| C | 1.79546900  | 1.20693700  | 0.31308600  |
| C | 1.14822100  | -0.00006000 | 0.61174000  |
| C | 1.79553500  | -1.20698600 | 0.31295900  |
| C | 3.06025200  | -1.20720800 | -0.26929000 |
| C | 3.69571100  | 0.00007100  | -0.56311600 |
| H | 3.55107300  | 2.14809500  | -0.49093100 |
| H | 1.30452300  | 2.14761800  | 0.53939800  |
| H | 1.30464000  | -2.14772000 | 0.53916500  |
| H | 3.55119400  | -2.14796600 | -0.49116600 |
| H | 4.68075700  | 0.00012300  | -1.01573800 |
| C | -0.18408500 | -0.00015100 | 1.26532500  |
| H | -0.38425200 | -0.89437100 | 1.84547600  |

|   |             |            |             |
|---|-------------|------------|-------------|
| I | -1.88398800 | 0.00001800 | -0.21096600 |
| H | -0.38428600 | 0.89392200 | 1.84569000  |

SCF Done: E(RB3LYP) = -282.423848642  
Zero-point correction= 0.118200 (Hartree/Particle)  
Thermal correction to Energy= 0.126096  
Thermal correction to Enthalpy= 0.127088  
Thermal correction to Gibbs Free Energy= 0.081627  
Sum of electronic and zero-point Energies= -282.305648  
Sum of electronic and thermal Energies= -282.297752  
Sum of electronic and thermal Enthalpies= -282.296761  
Sum of electronic and thermal Free Energies= -282.342222

## HI

|   |            |            |             |
|---|------------|------------|-------------|
| I | 0.00000000 | 0.00000000 | 0.02976100  |
| H | 0.00000000 | 0.00000000 | -1.57734700 |

SCF Done: E(RB3LYP) = -11.9889623886  
Zero-point correction= 0.005256 (Hartree/Particle)  
Thermal correction to Energy= 0.007736  
Thermal correction to Enthalpy= 0.008728  
Thermal correction to Gibbs Free Energy= -0.016051  
Sum of electronic and zero-point Energies= -11.983706  
Sum of electronic and thermal Energies= -11.981226  
Sum of electronic and thermal Enthalpies= -11.980235  
Sum of electronic and thermal Free Energies= -12.005013

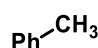

|   |             |             |             |
|---|-------------|-------------|-------------|
| C | -1.20022500 | 1.20428900  | 0.00204100  |
| C | 0.19460400  | 1.20141700  | -0.00875900 |
| C | 0.91409100  | -0.00000100 | -0.01115400 |
| C | 0.19460200  | -1.20141800 | -0.00875900 |
| C | -1.20022700 | -1.20428800 | 0.00204100  |
| C | -1.90412300 | 0.00000100  | 0.00830800  |
| H | -1.73649200 | 2.14705900  | 0.00175300  |
| H | 0.73209800  | 2.14451400  | -0.01778700 |
| H | 0.73209400  | -2.14451500 | -0.01778700 |
| H | -1.73649500 | -2.14705700 | 0.00175300  |
| H | -2.98831300 | 0.00000200  | 0.01363500  |
| C | 2.42433000  | -0.00000100 | 0.00880300  |
| H | 2.82868500  | -0.88546000 | -0.48698200 |
| H | 2.82868600  | 0.88539300  | -0.48710000 |
| H | 2.80141800  | 0.00006900  | 1.03738600  |

SCF Done: E(UB3LYP) = -271.641235309  
Zero-point correction= 0.127205 (Hartree/Particle)  
Thermal correction to Energy= 0.133997  
Thermal correction to Enthalpy= 0.134989  
Thermal correction to Gibbs Free Energy= 0.094719  
Sum of electronic and zero-point Energies= -271.514031  
Sum of electronic and thermal Energies= -271.507238  
Sum of electronic and thermal Enthalpies= -271.506246  
Sum of electronic and thermal Free Energies= -271.546516

## 7. NMR Spectra

### (S)-Ethyl-2-(4-methylphenylsulfonamido)-3-phenylpropanoate (1a)

$^1\text{H}$  NMR ( $\text{CDCl}_3$ )

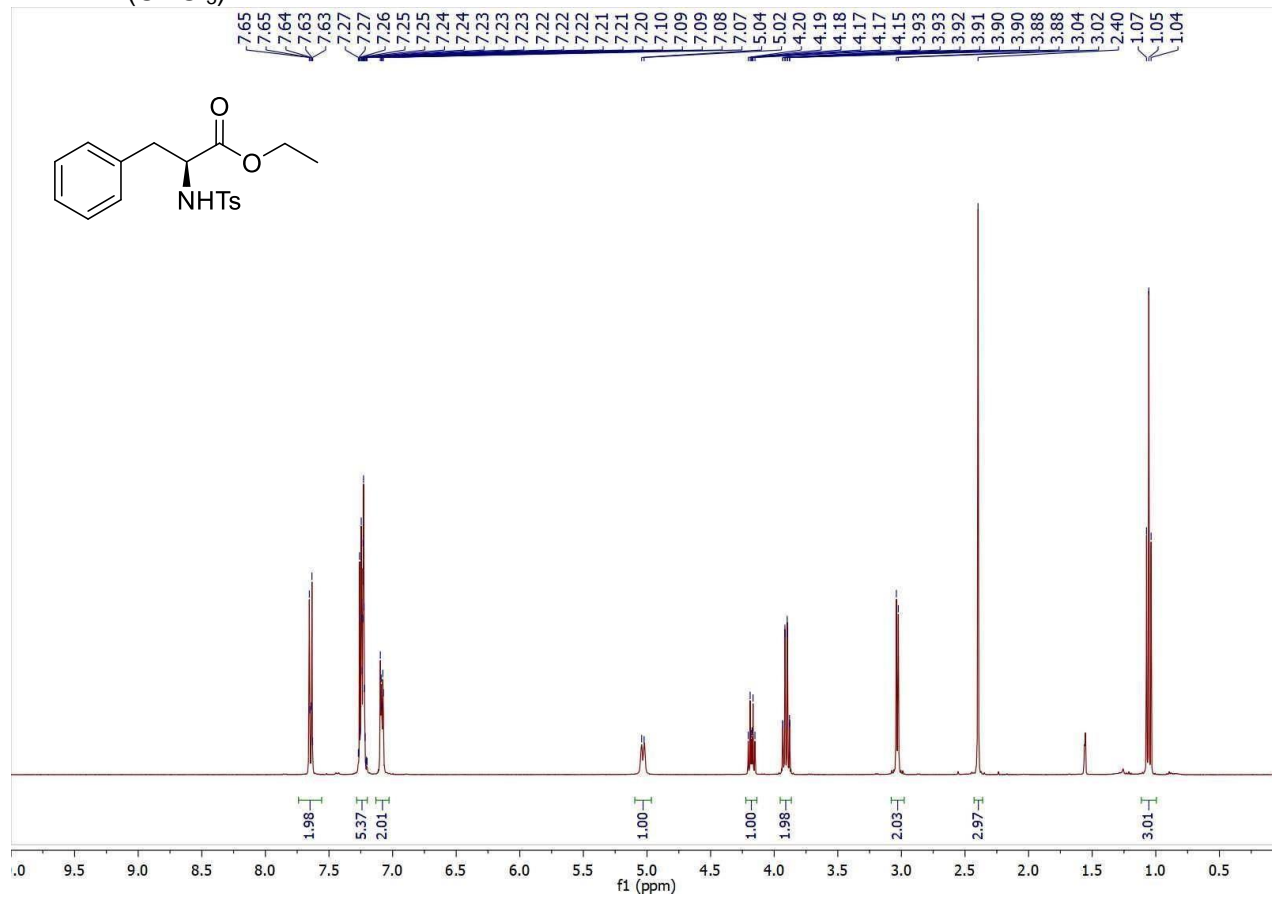

$^{13}\text{C}\{^1\text{H}\}$  NMR ( $\text{CDCl}_3$ )

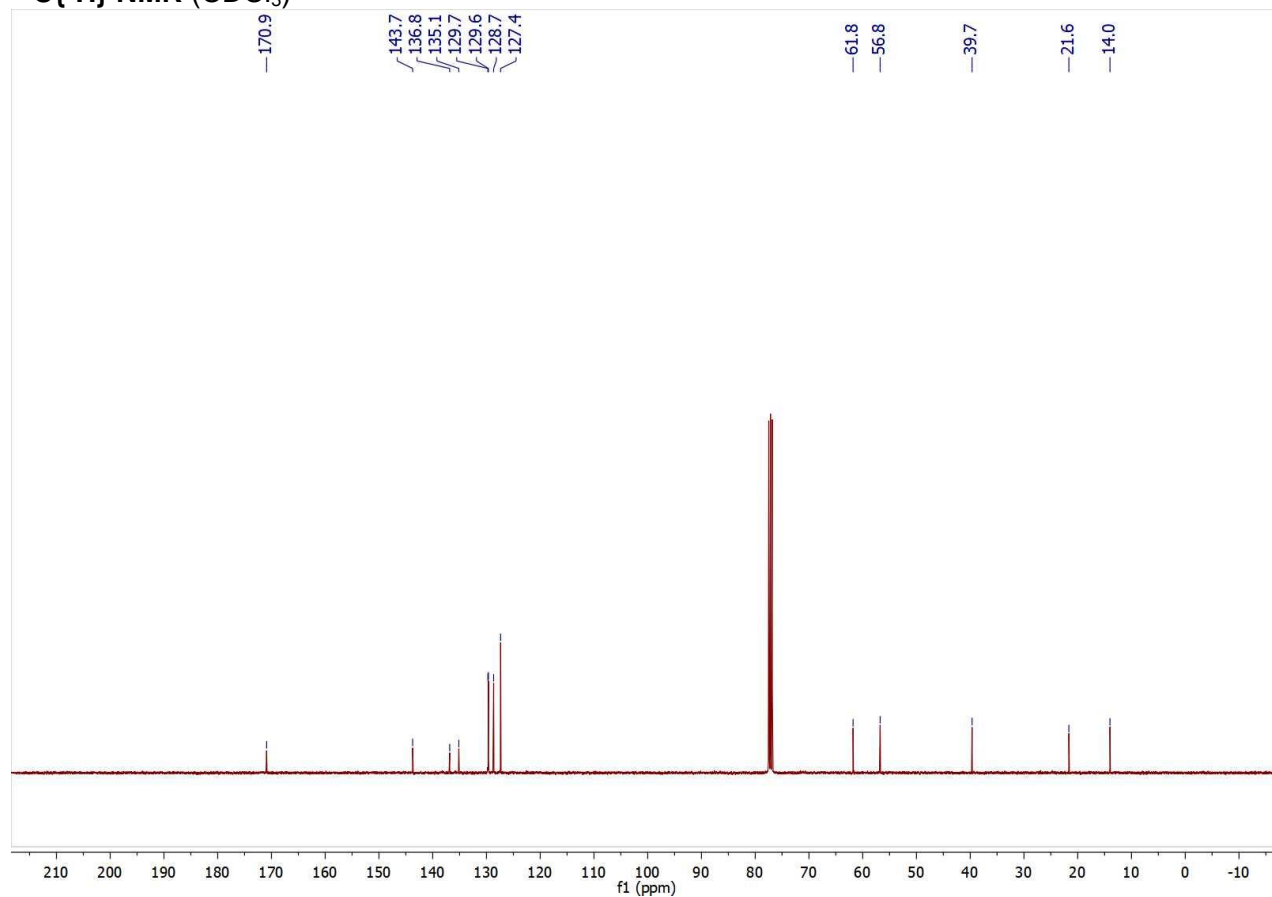

**Ethyl 2(S)-3-phenyl-2-(methylsulfonamido)propanoate (1aMs)**

**$^1\text{H}$  NMR ( $\text{CDCl}_3$ )**

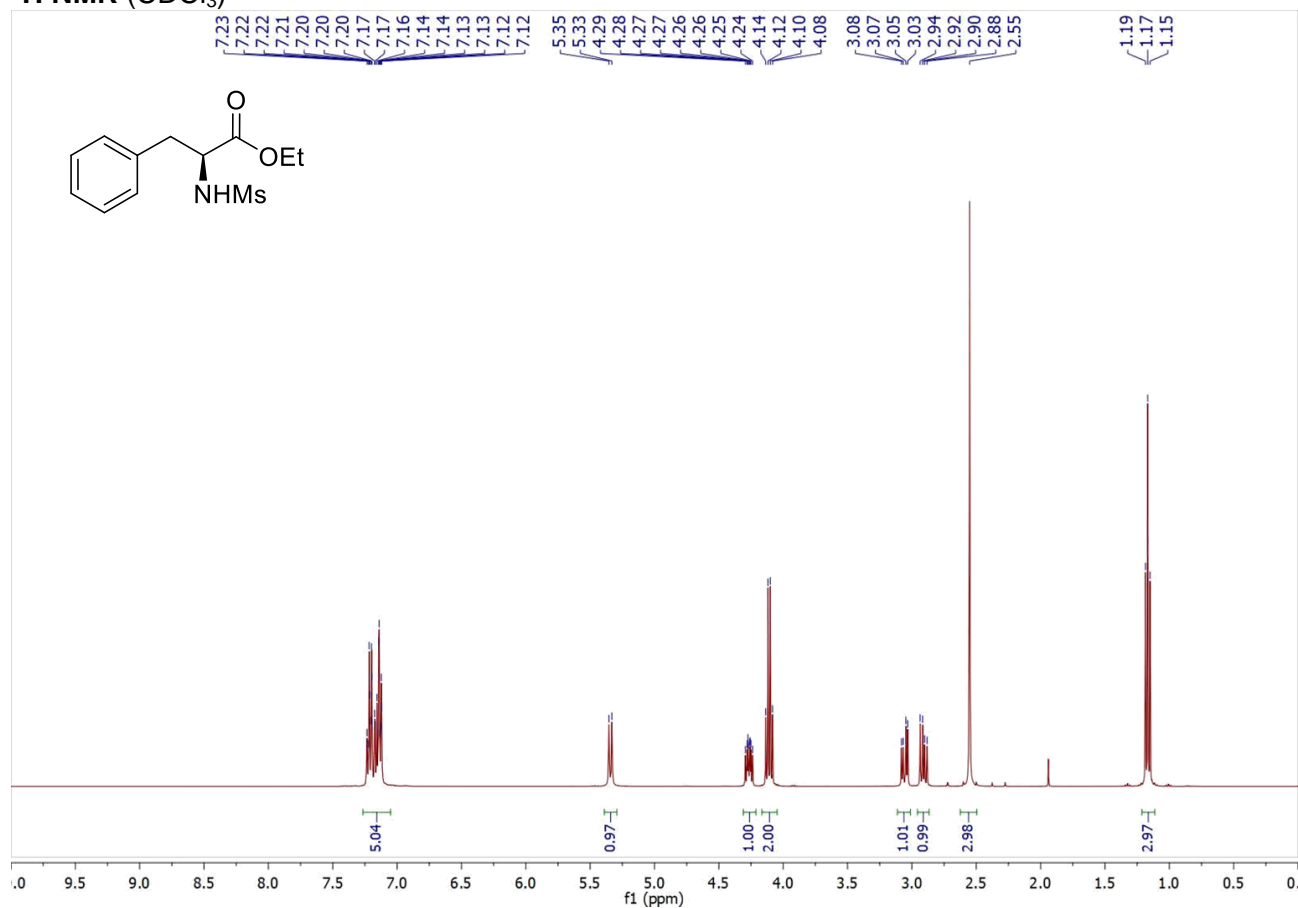

**$^{13}\text{C}\{^1\text{H}\}$  NMR ( $\text{CDCl}_3$ )**

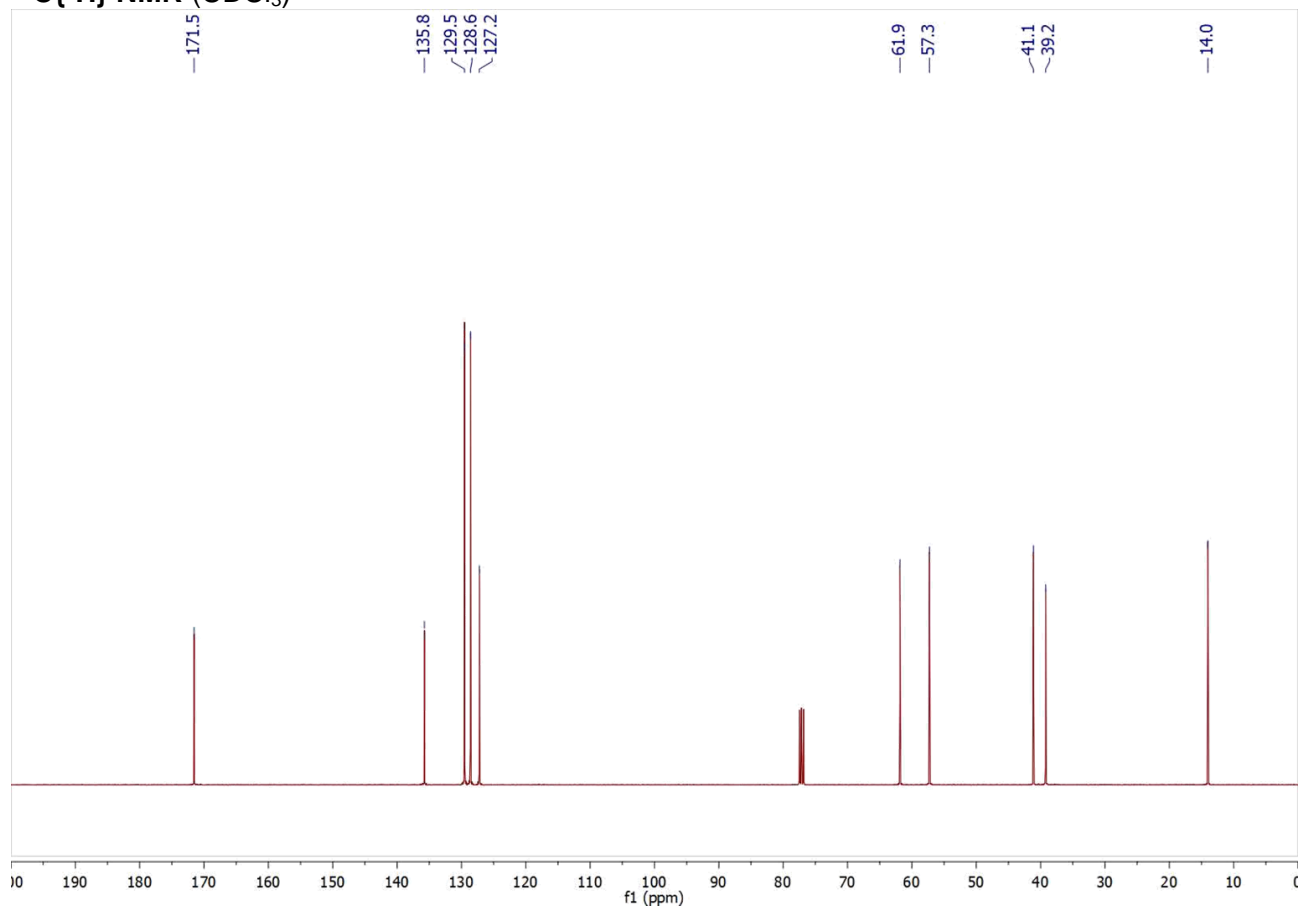

**(S)-Ethyl 2-((trifluoromethyl)sulfonamido)-3-phenylpropanoate (1aTf)**

<sup>1</sup>H NMR (CDCl<sub>3</sub>)

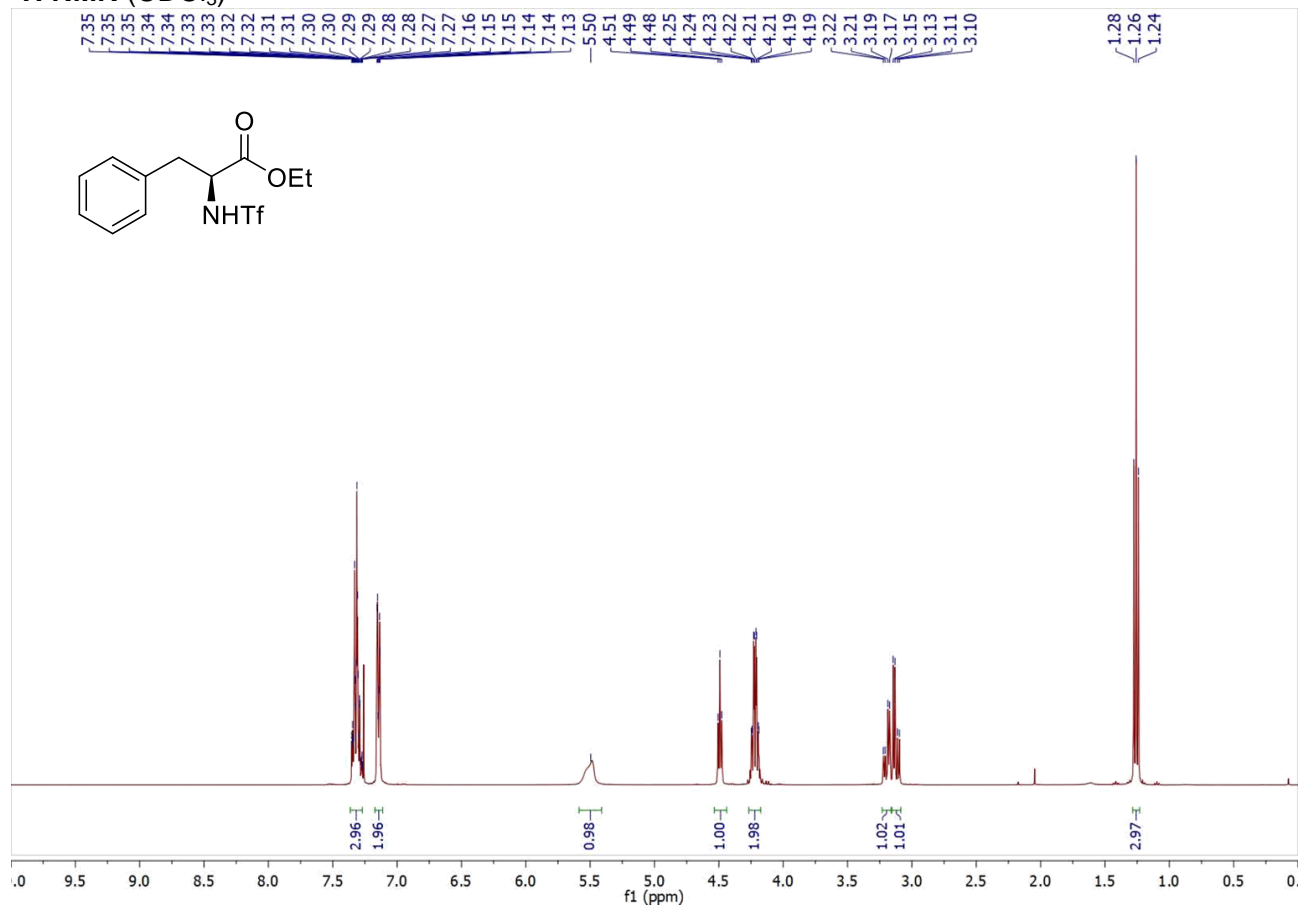

<sup>13</sup>C{<sup>1</sup>H} NMR (CDCl<sub>3</sub>)

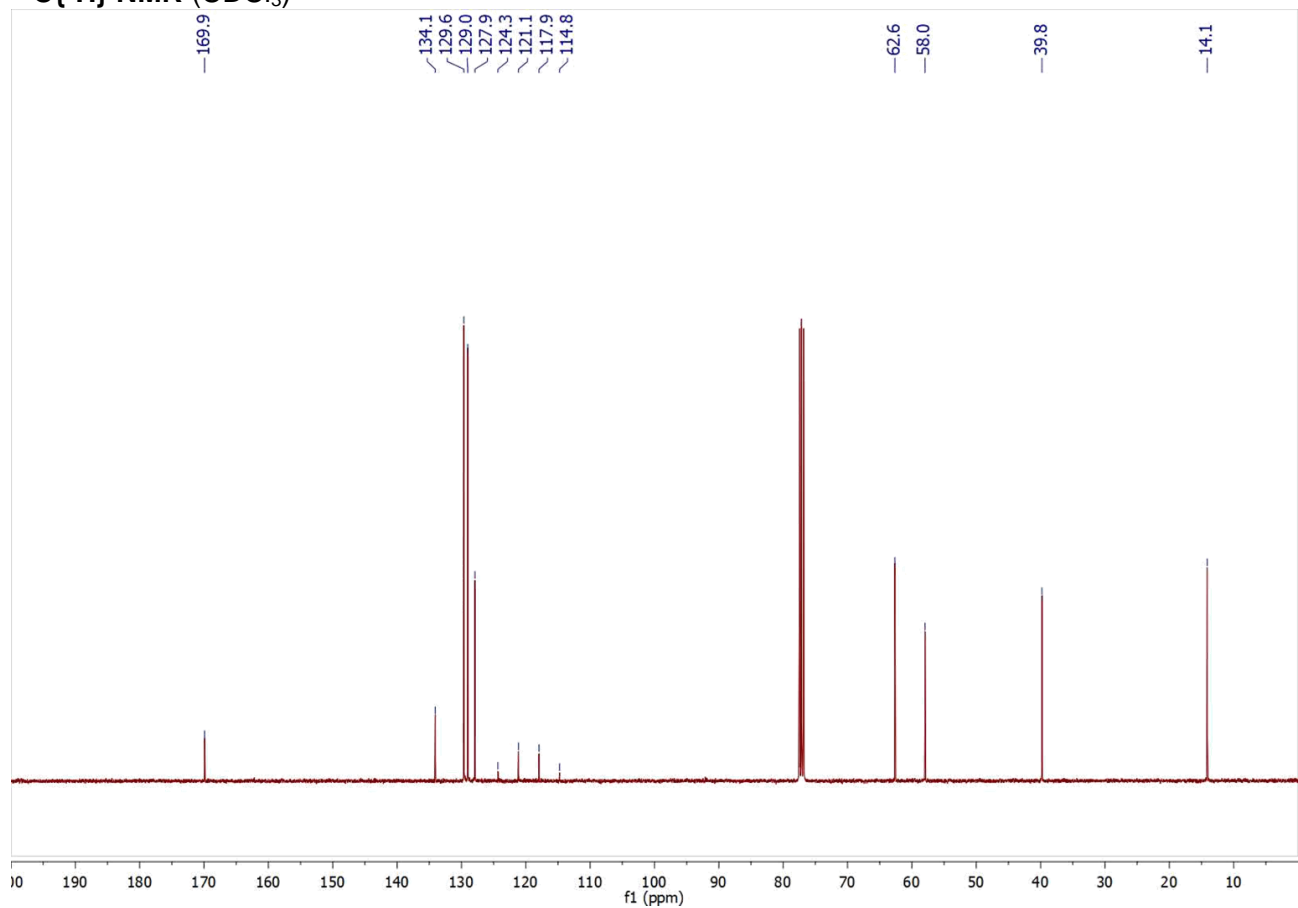



**$^{19}\text{F}$  NMR ( $\text{CDCl}_3$ )**

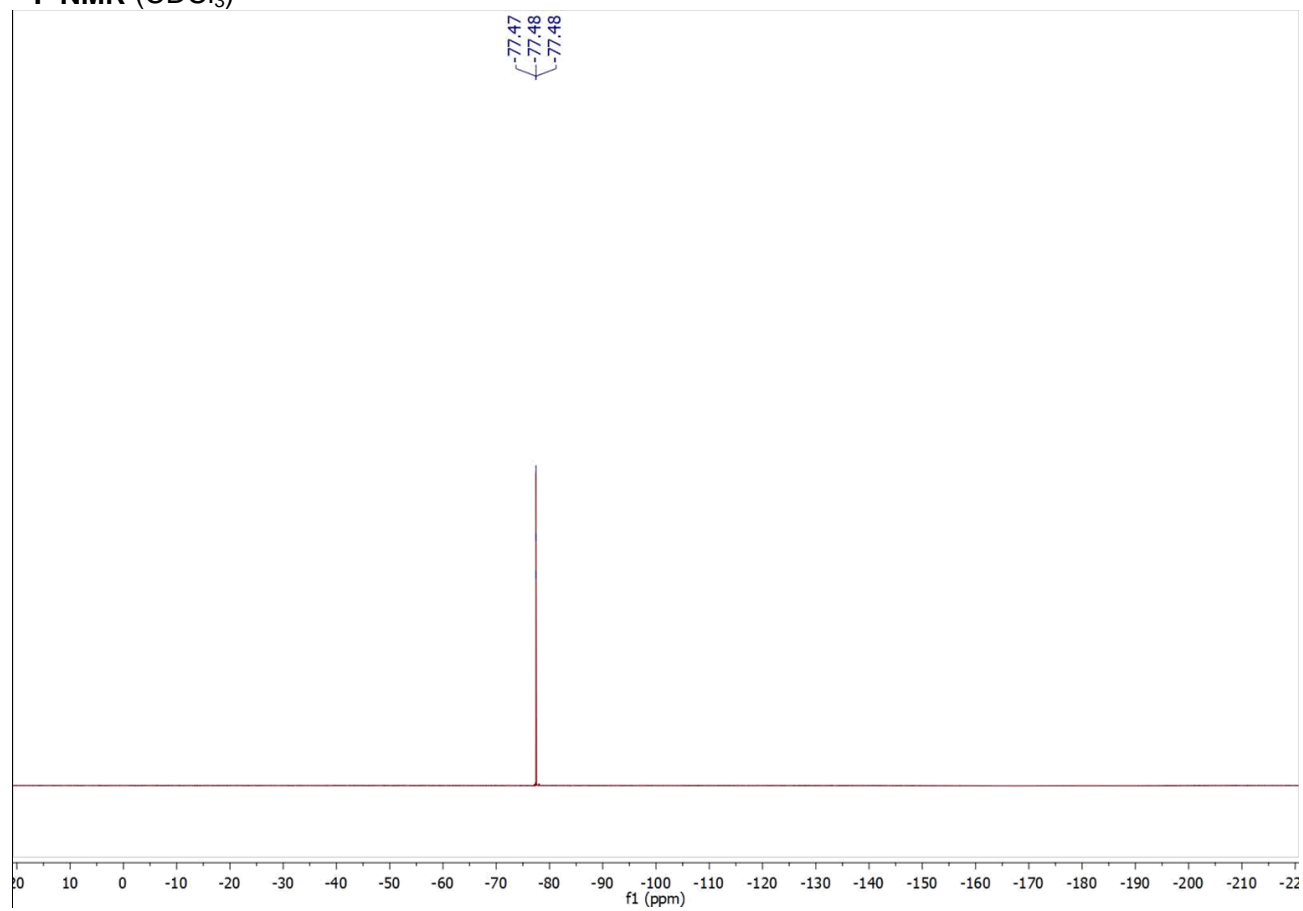

**(S)-Methyl-2-(4-methylphenylsulfonamido)-3-(4-(tosyloxy)phenyl)propanoate (1b)**

**<sup>1</sup>H NMR (CDCl<sub>3</sub>)**

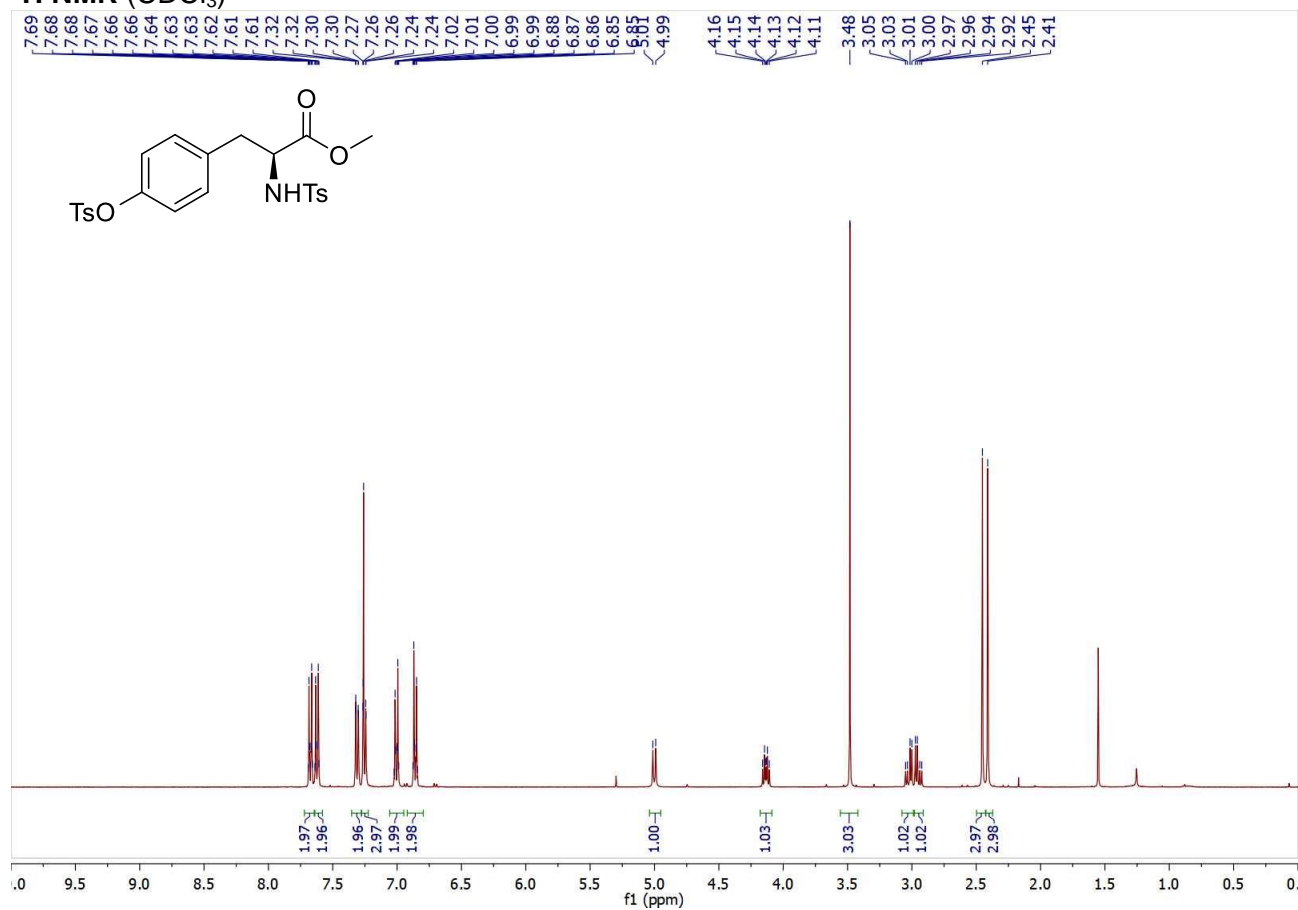

**<sup>13</sup>C{<sup>1</sup>H} NMR (CDCl<sub>3</sub>)**

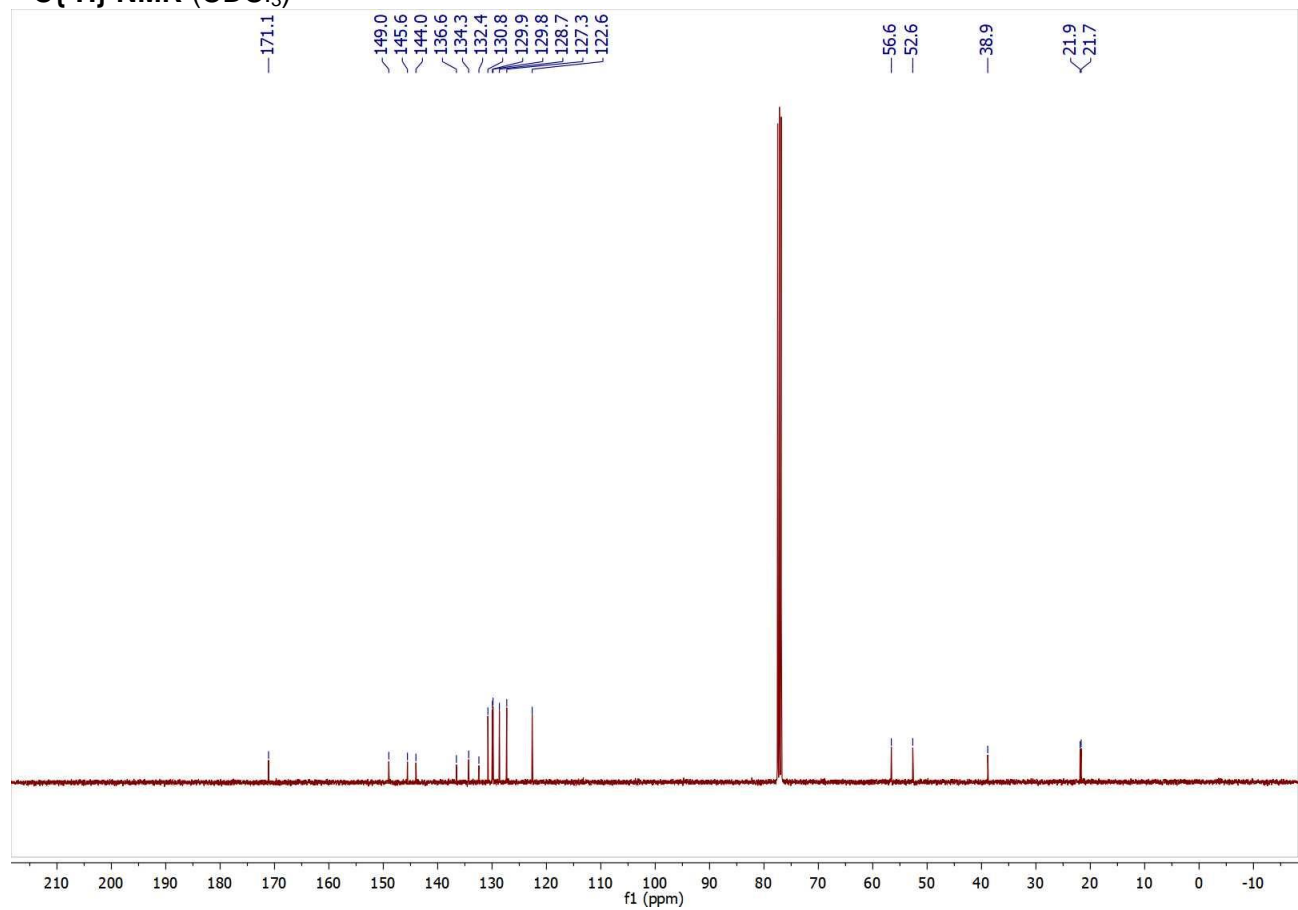

**1,3-Dioxoisindolin-2-yl-(2S)-2-((4-methylphenyl)sulfonamido)-3-phenylpropanoate (1c)**

**$^1\text{H}$  NMR ( $\text{CDCl}_3$ )**

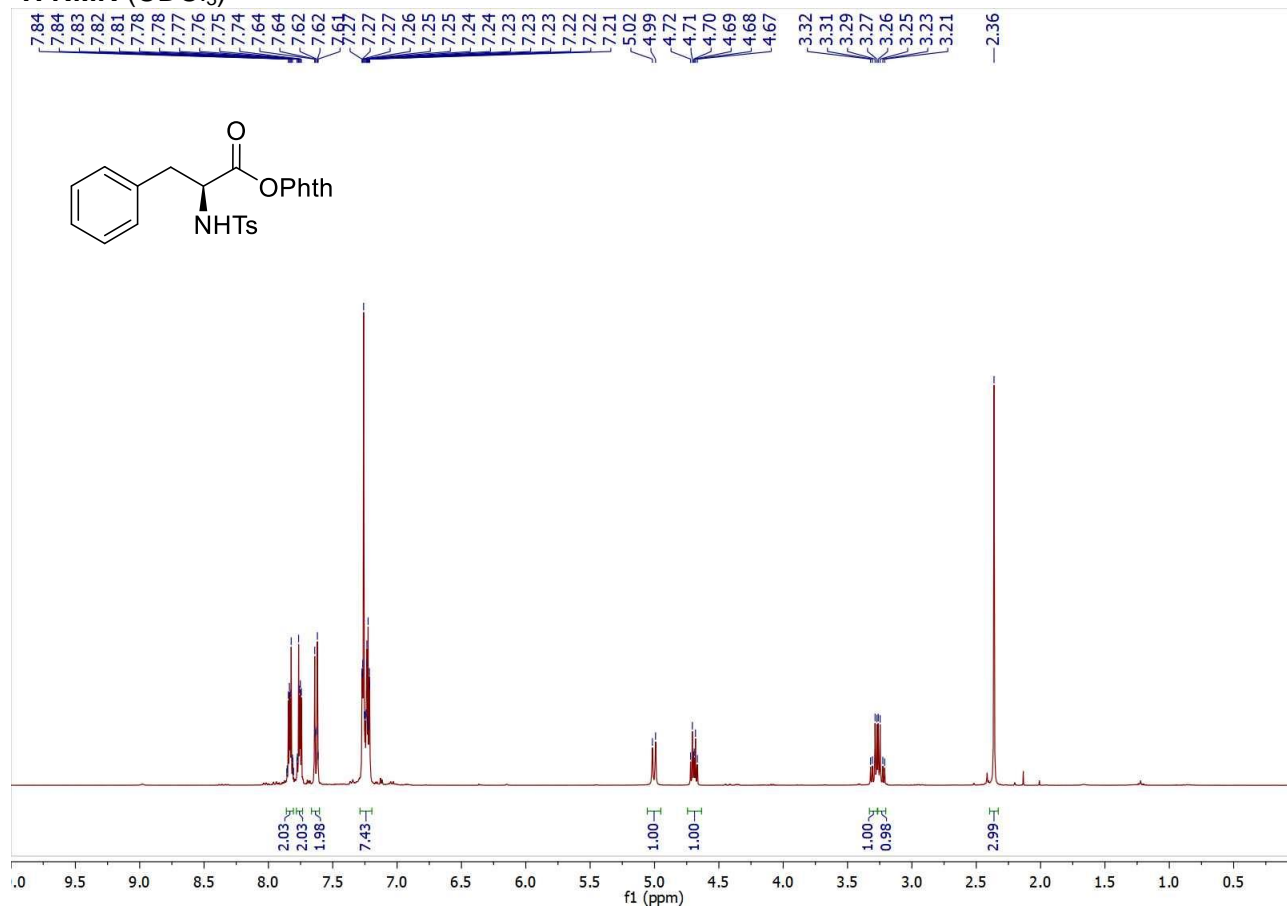

**$^{13}\text{C}\{^1\text{H}\}$  NMR ( $\text{CDCl}_3$ )**

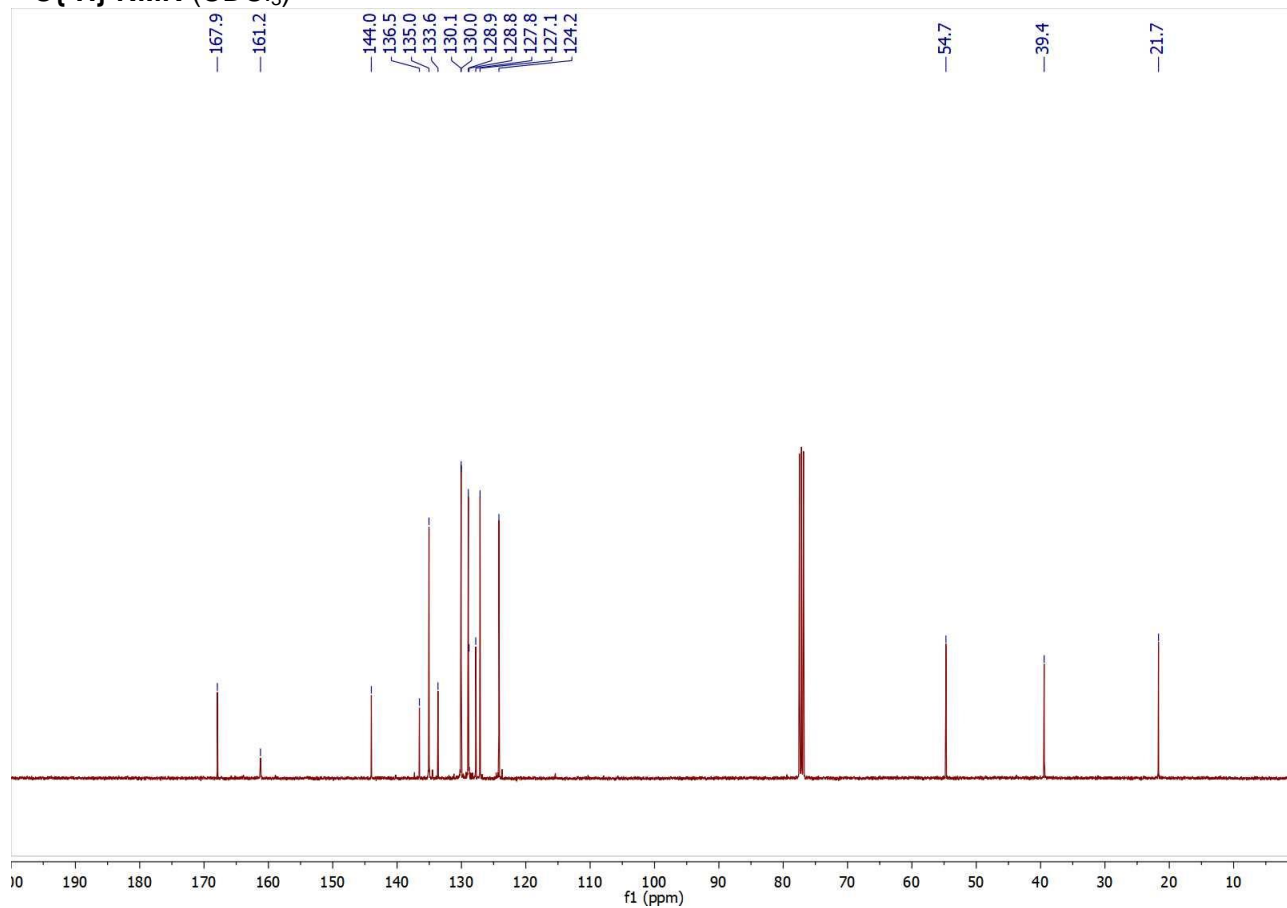

**(S)-N-methoxy-N-methyl-2-((4-methylphenyl)sulfonamido)-3-phenylpropanamide (1d)**

<sup>1</sup>H NMR (CDCl<sub>3</sub>)

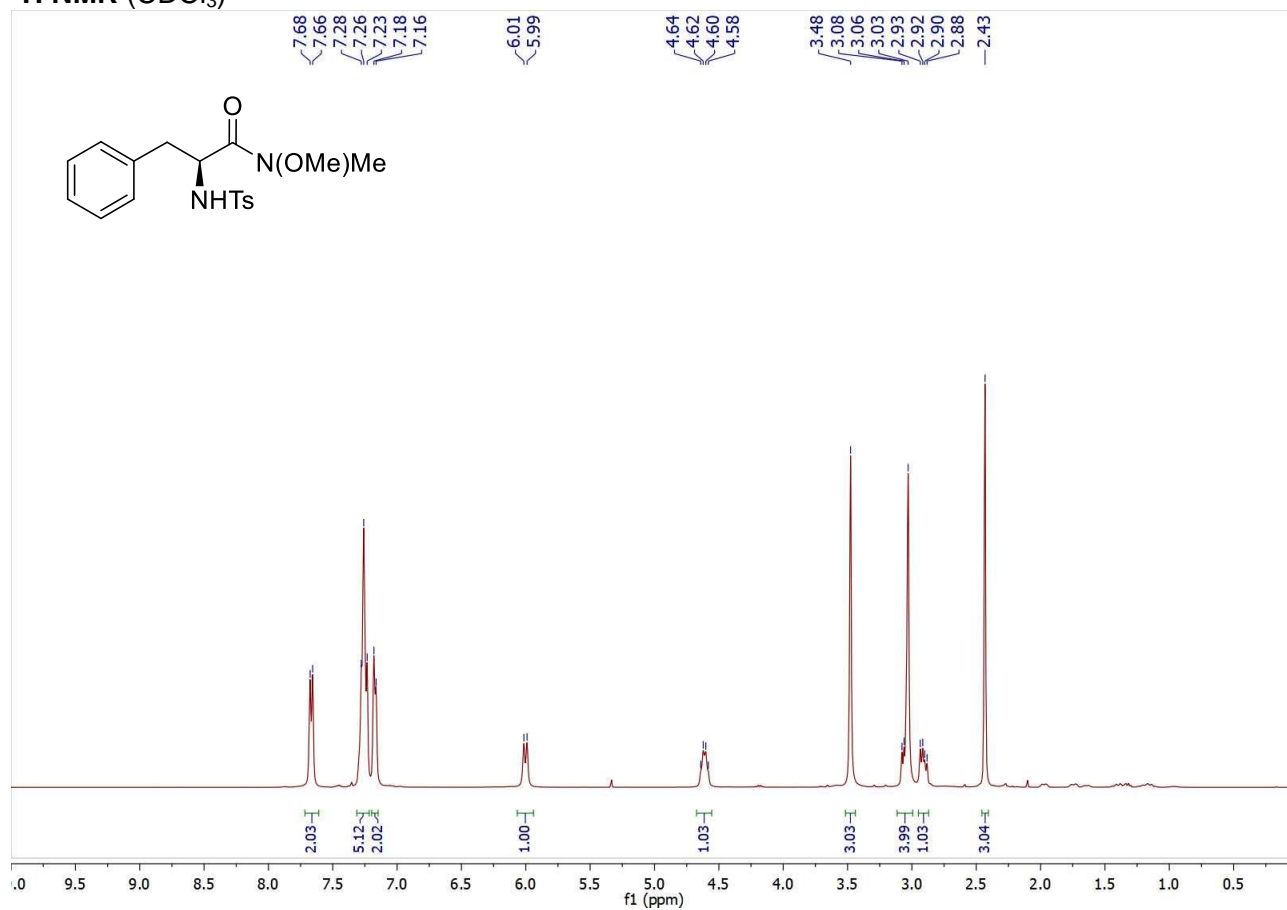

<sup>13</sup>C{<sup>1</sup>H} NMR (CDCl<sub>3</sub>)

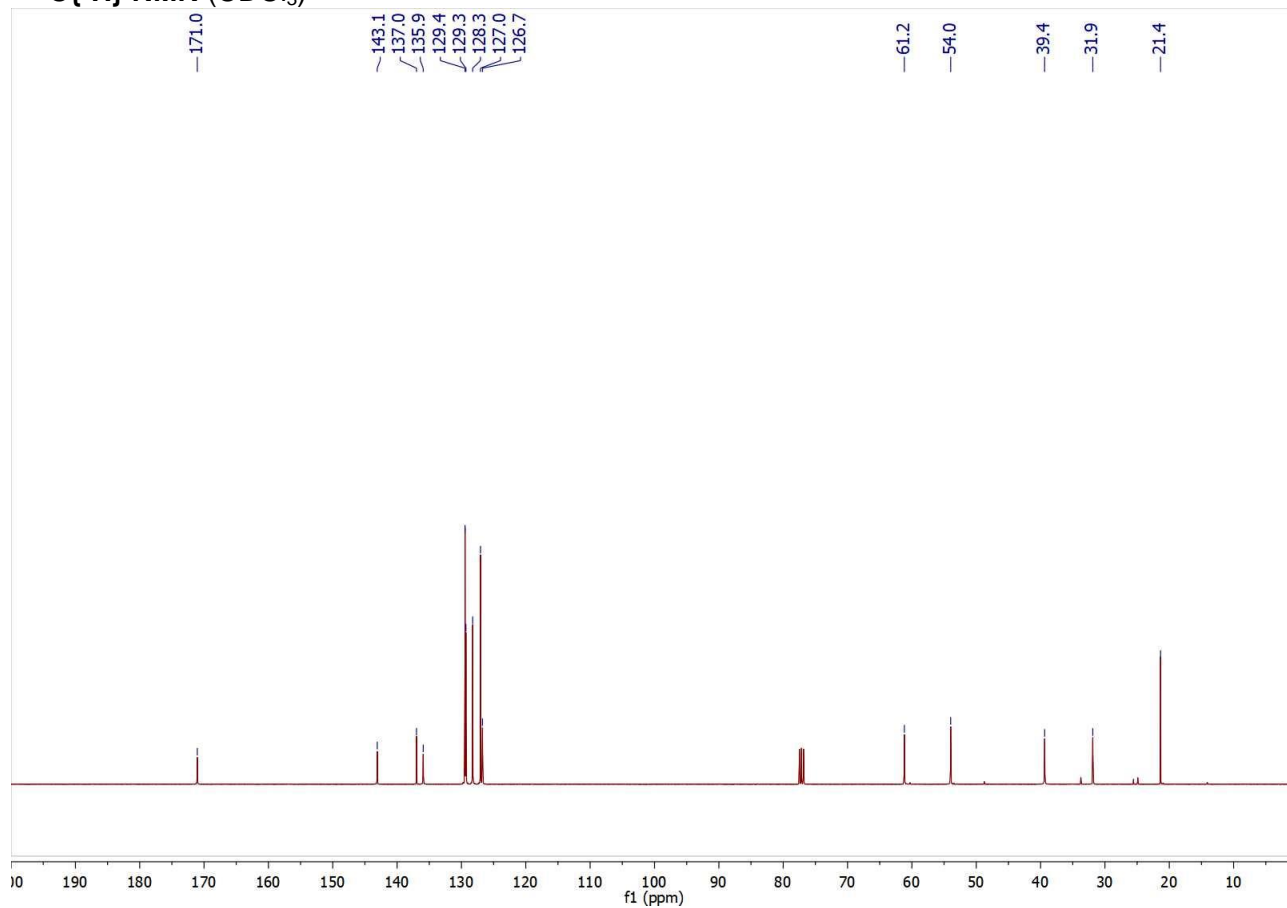

**(S)-N-Methyl-2-(4-methylsulfonylamido)-3-phenylpropanamide (1e)**

<sup>1</sup>H NMR (CD<sub>3</sub>OD)

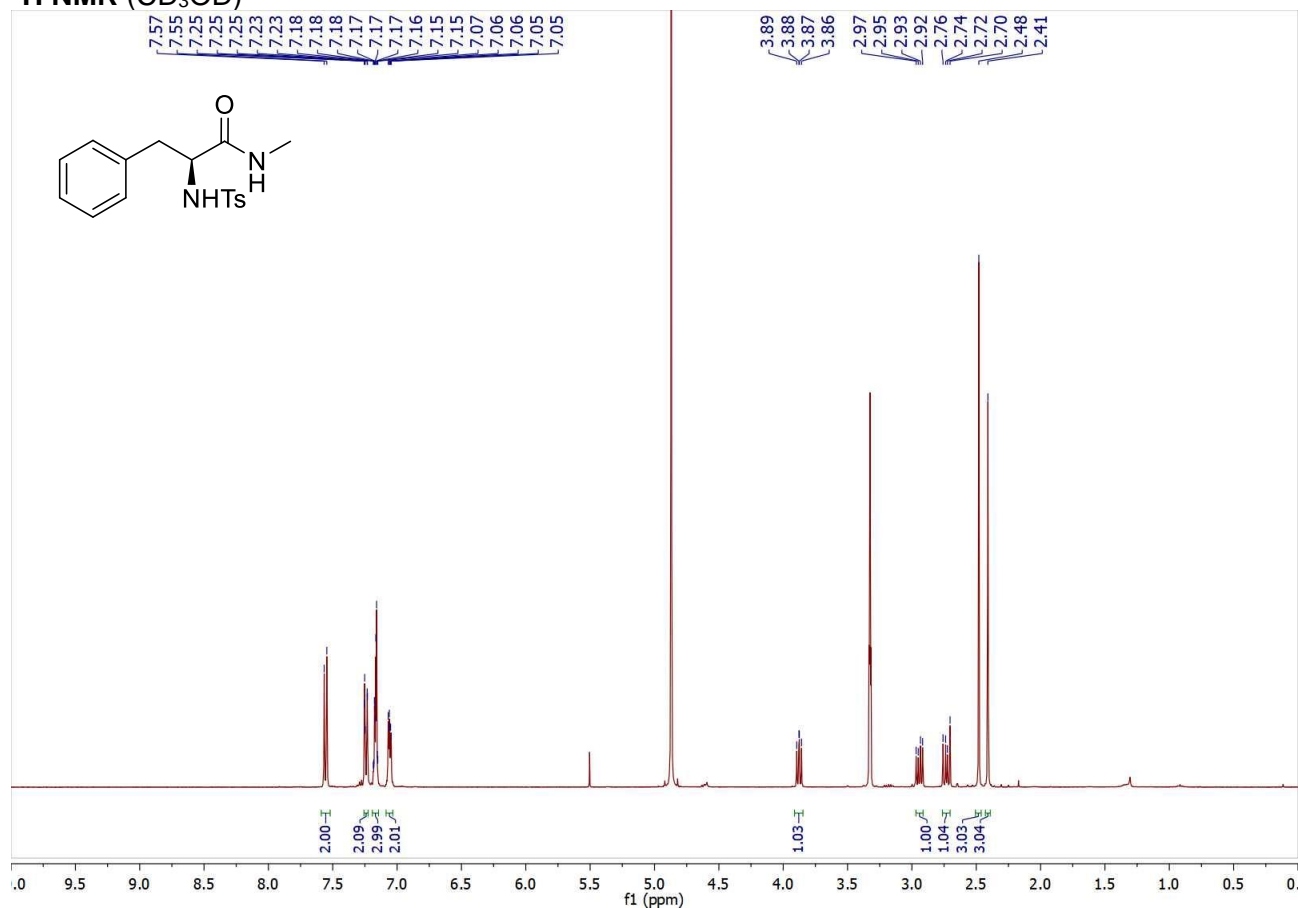

<sup>13</sup>C{<sup>1</sup>H} NMR (CD<sub>3</sub>OD)

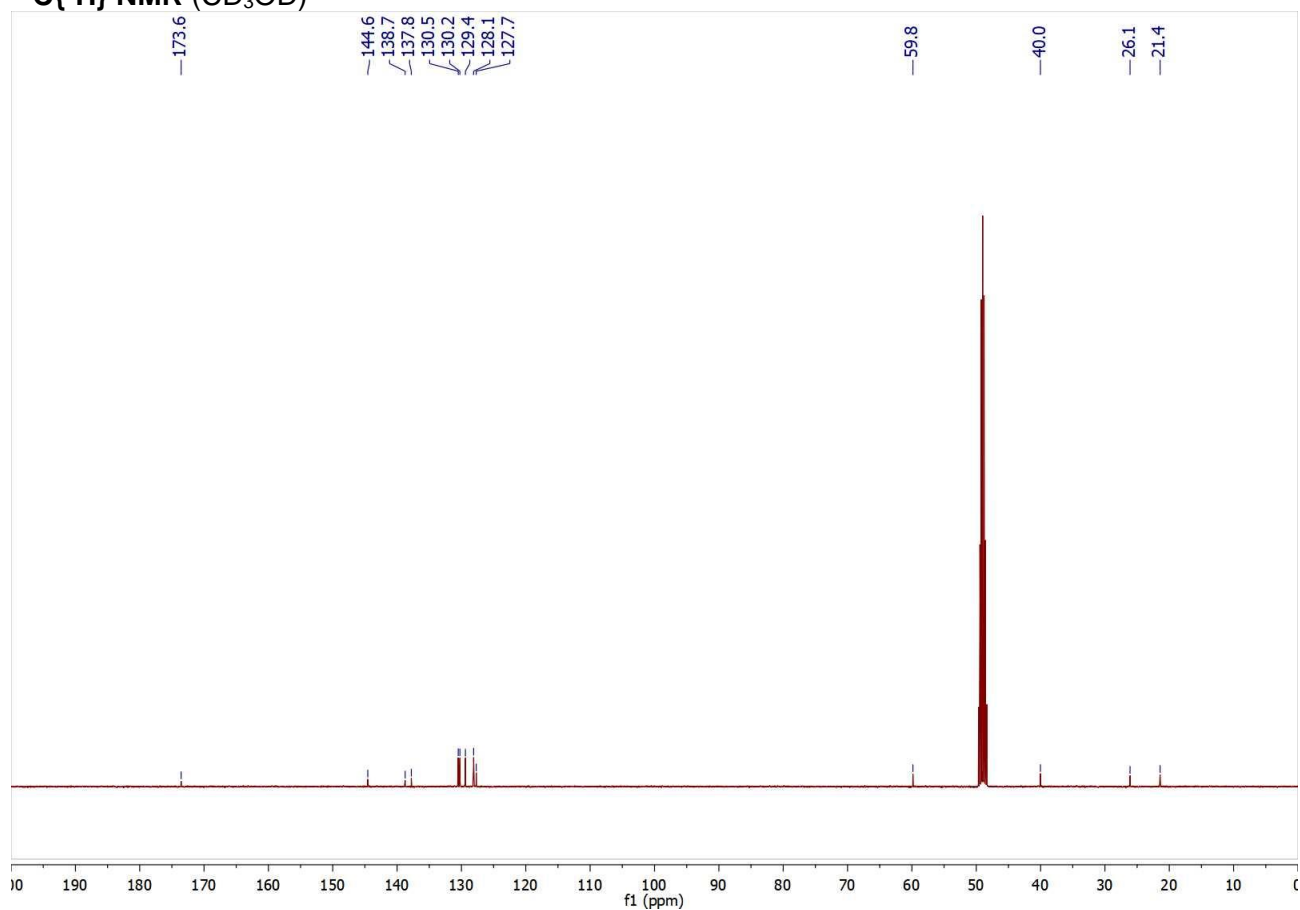

**(S)-N-Benzy-2-(4-methylphenyl)sulfonamido)-3-phenylpropanamide (1f)**

**<sup>1</sup>H NMR (CDCl<sub>3</sub>)**

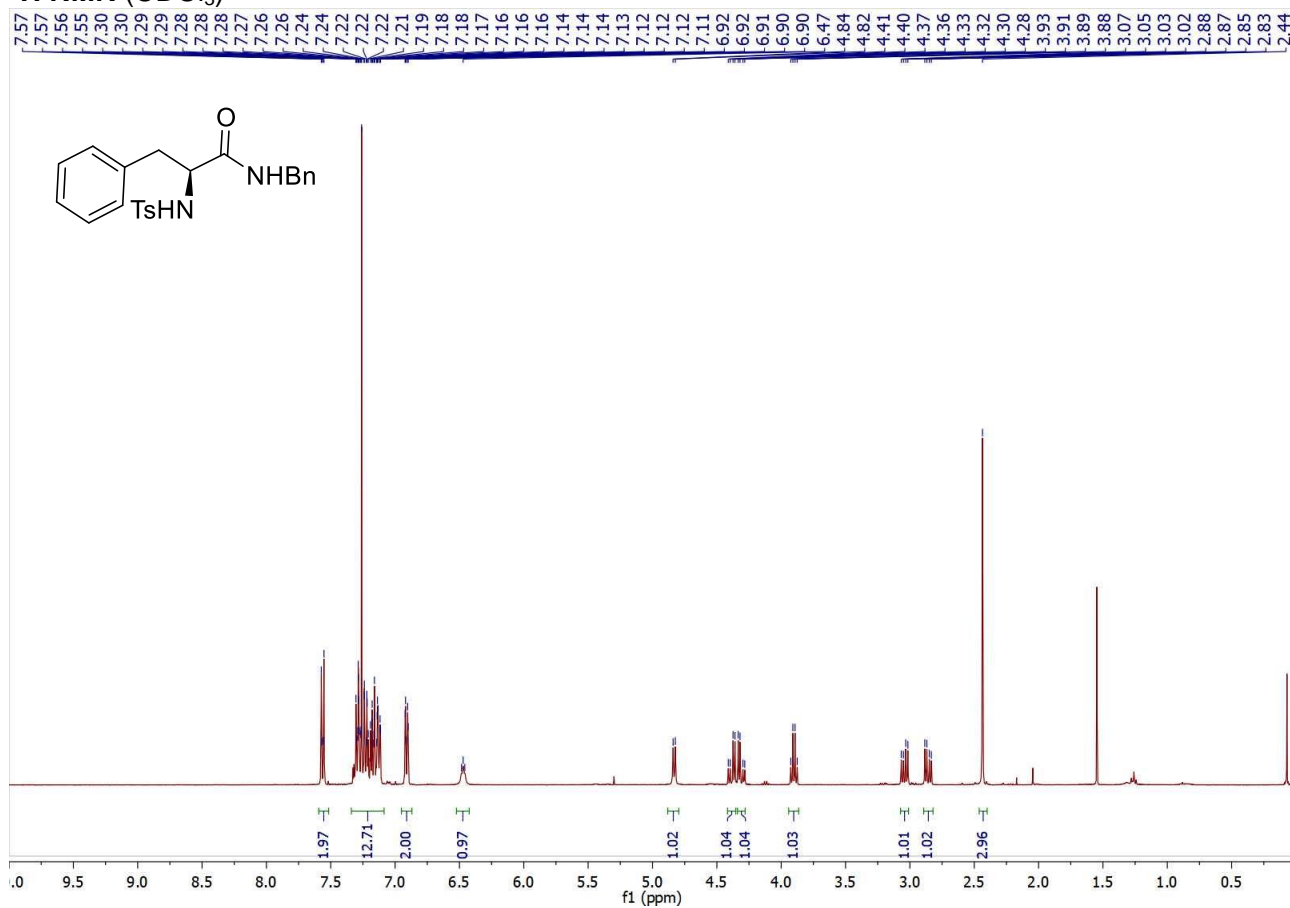

**<sup>13</sup>C{<sup>1</sup>H} NMR (CDCl<sub>3</sub>)**

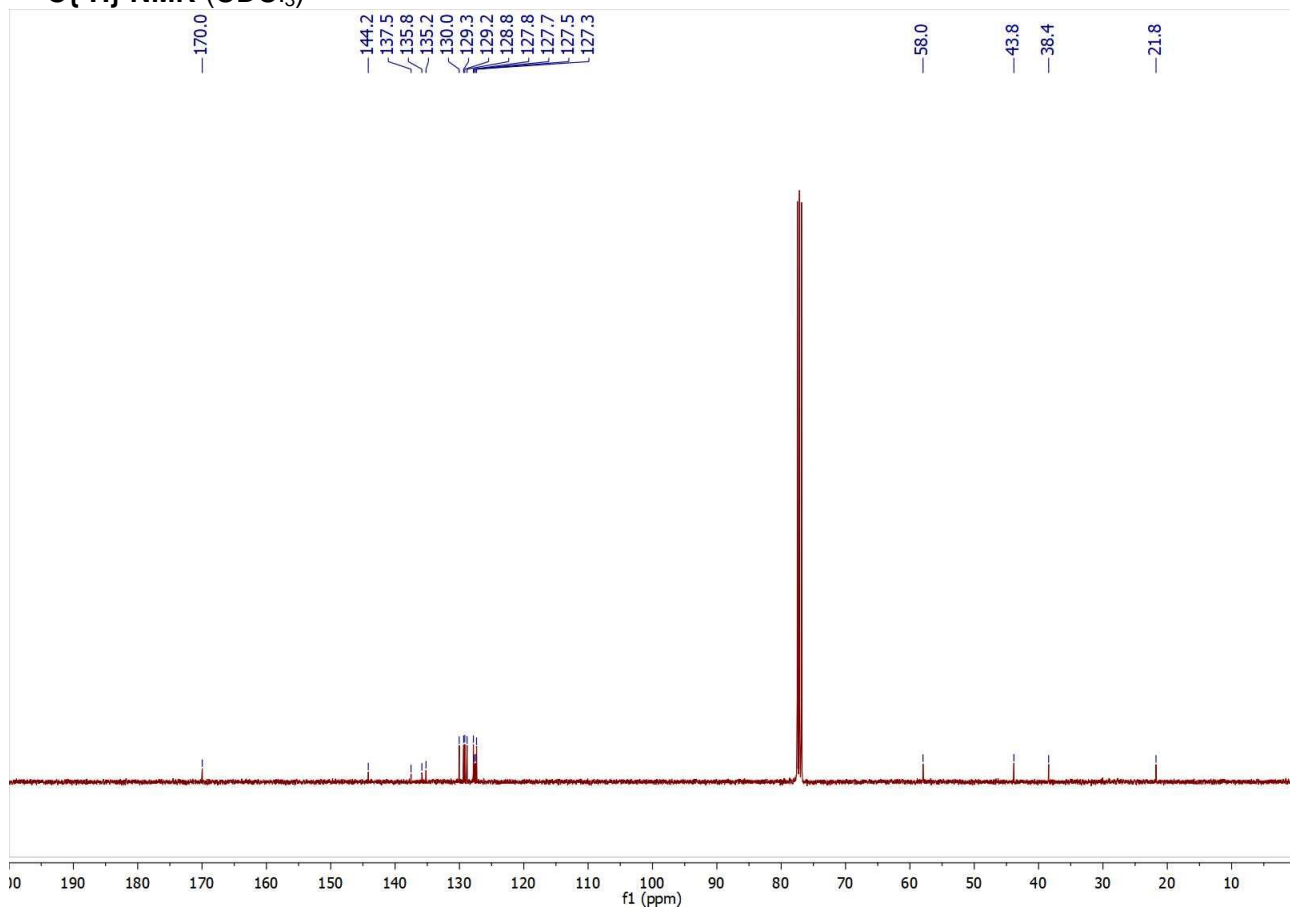



***N*-(1-Cyano-2-phenylethyl)-4-methylbenzenesulfonamide (1h)**

<sup>1</sup>H NMR (CD<sub>3</sub>COCD<sub>3</sub>)

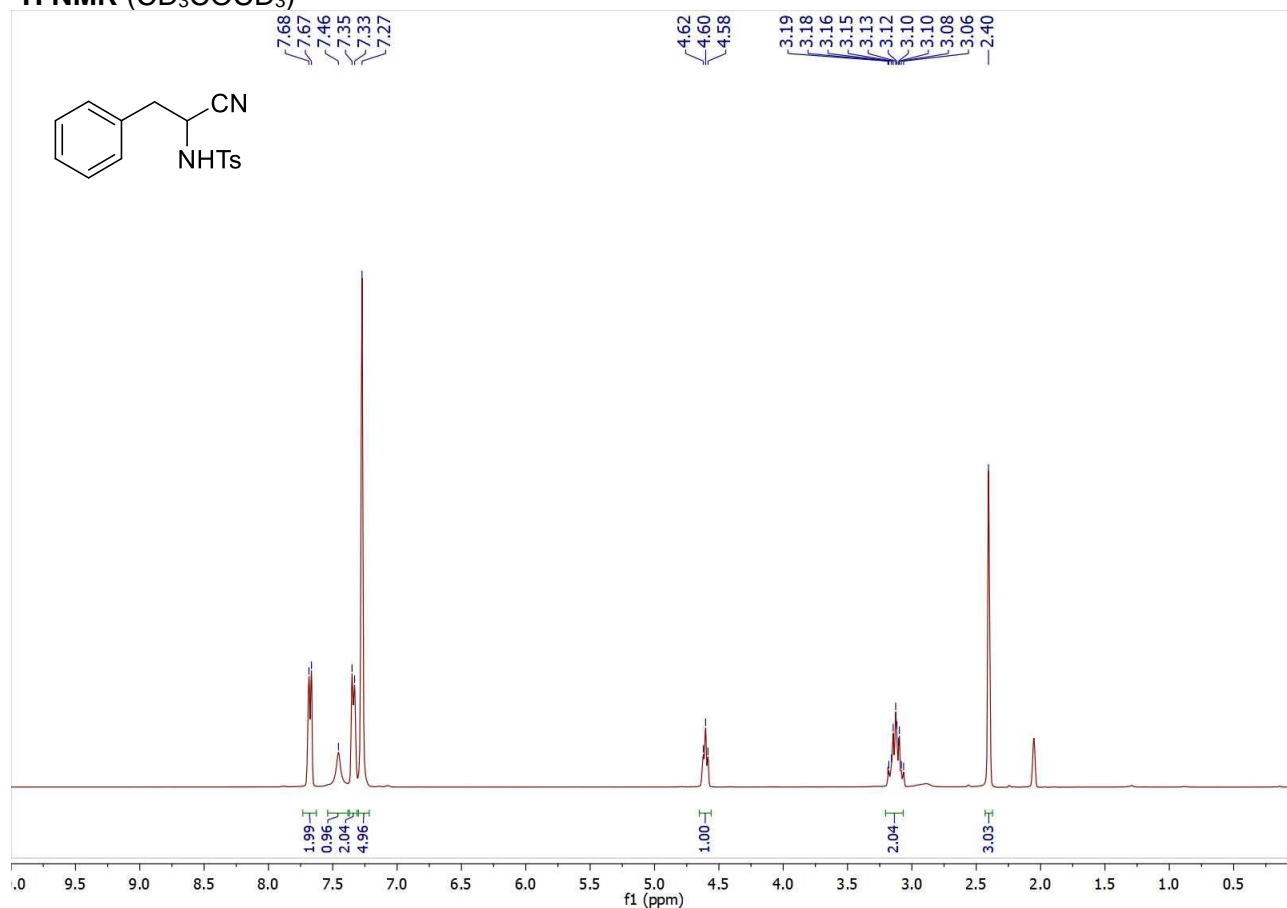

<sup>13</sup>C{<sup>1</sup>H} NMR (CD<sub>3</sub>COCD<sub>3</sub>)

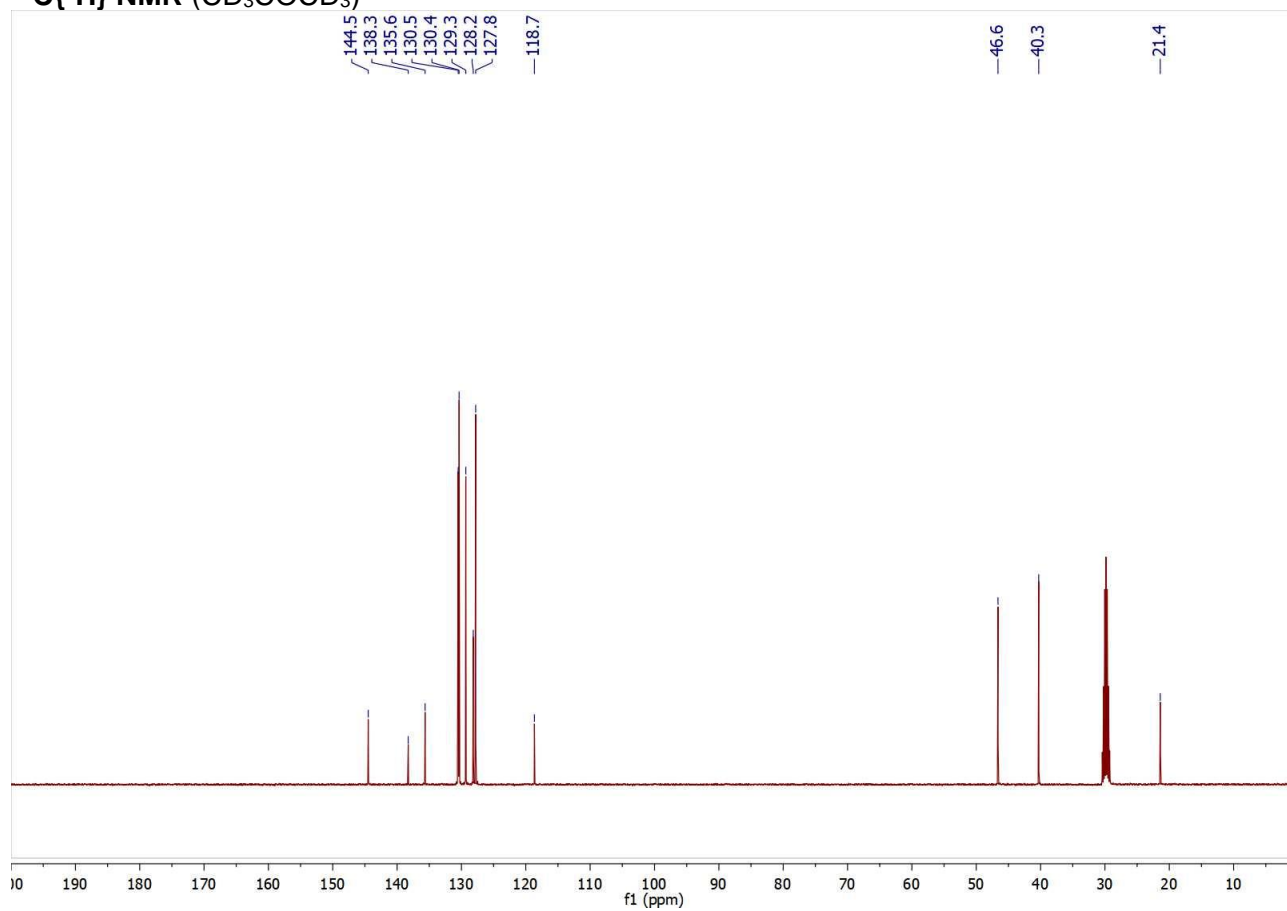



# 4-Methyl-*N*-phenylethylbencensulfonamide (1i)

<sup>1</sup>H NMR (CDCl<sub>3</sub>)

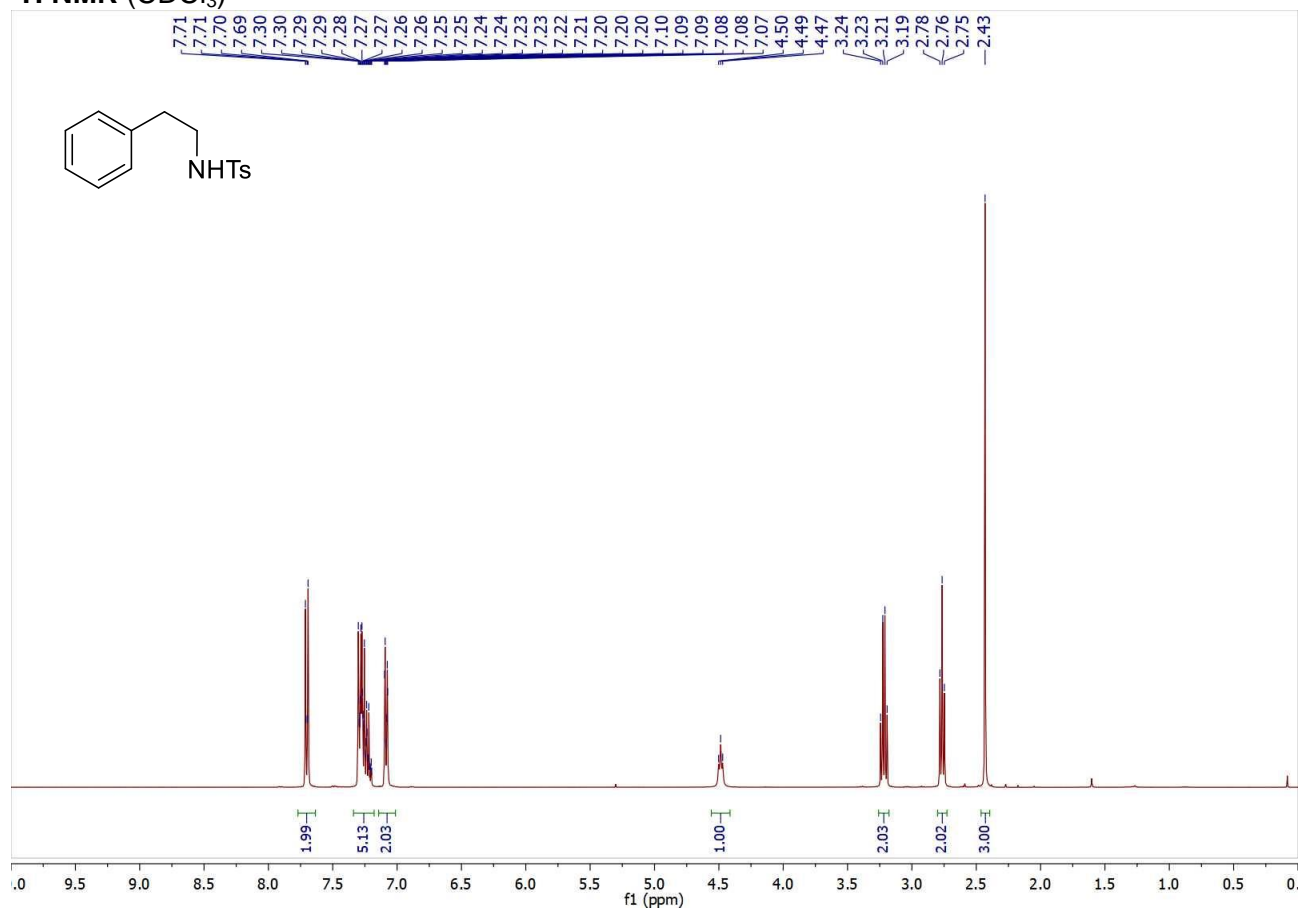

<sup>13</sup>C{<sup>1</sup>H} NMR (CDCl<sub>3</sub>)

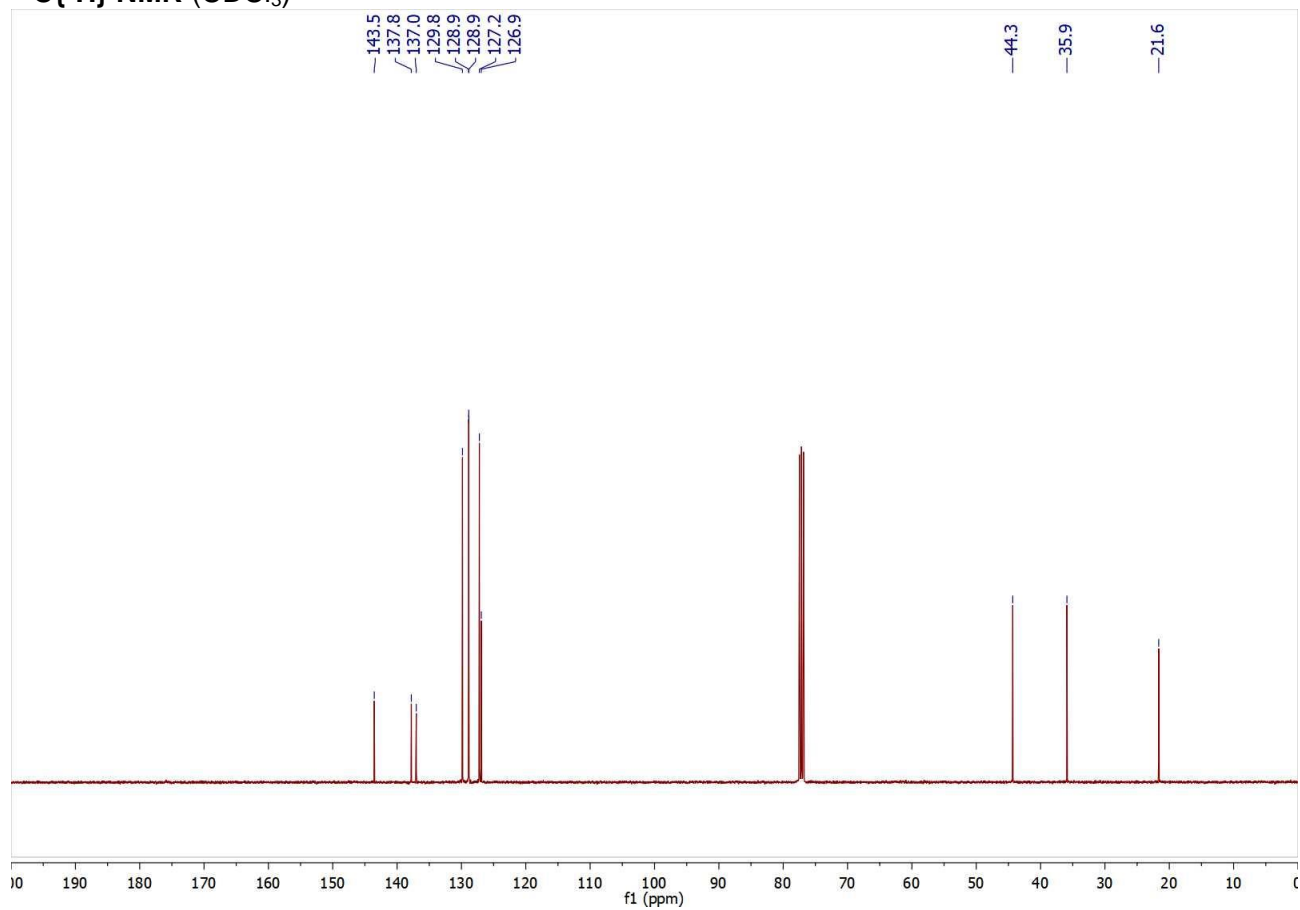

***N*-(2,2-Diphenylethyl)-4-methylbenzenesulfonamide (1i')**

<sup>1</sup>H NMR (CDCl<sub>3</sub>)

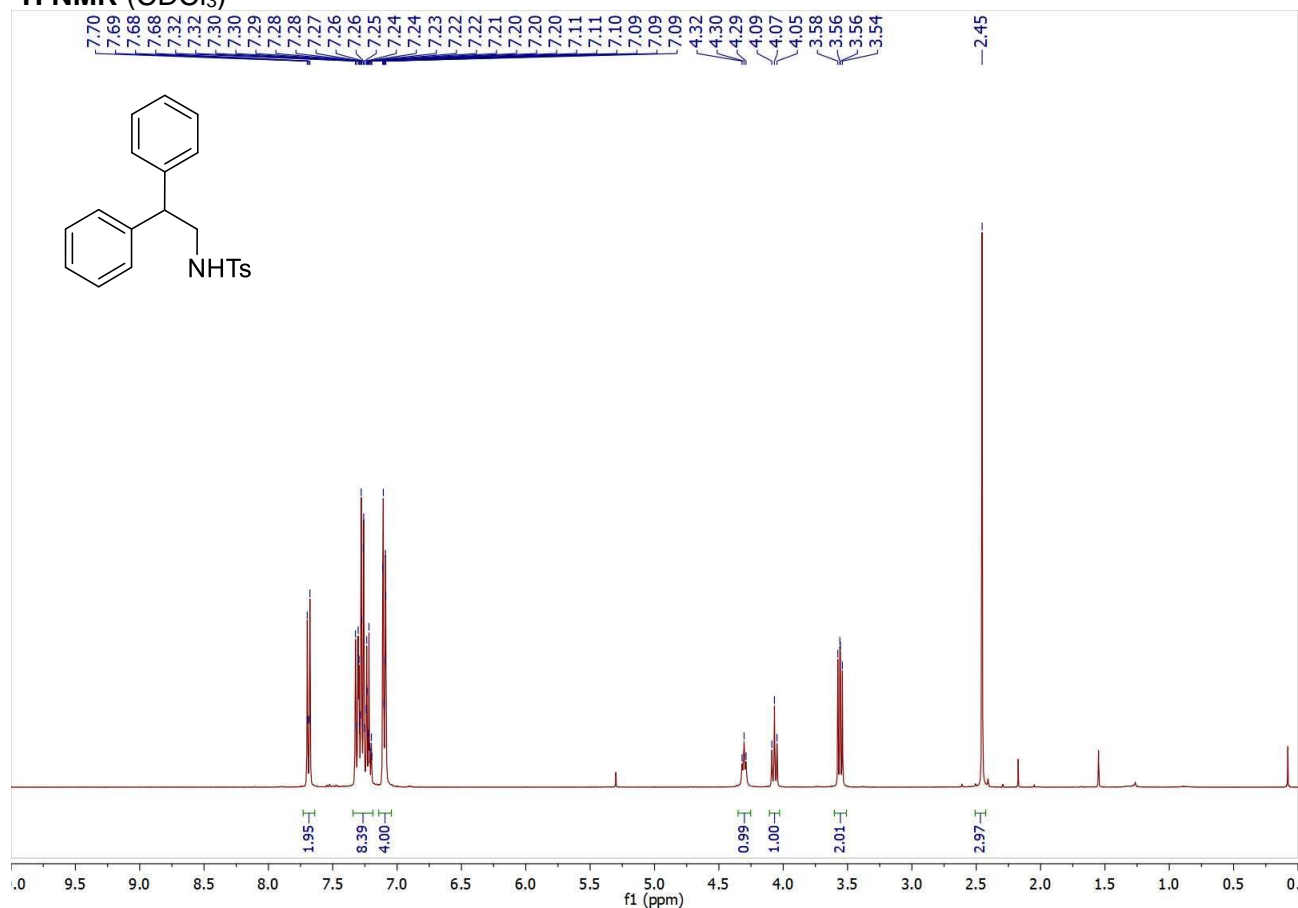

<sup>13</sup>C{<sup>1</sup>H} NMR (CDCl<sub>3</sub>)

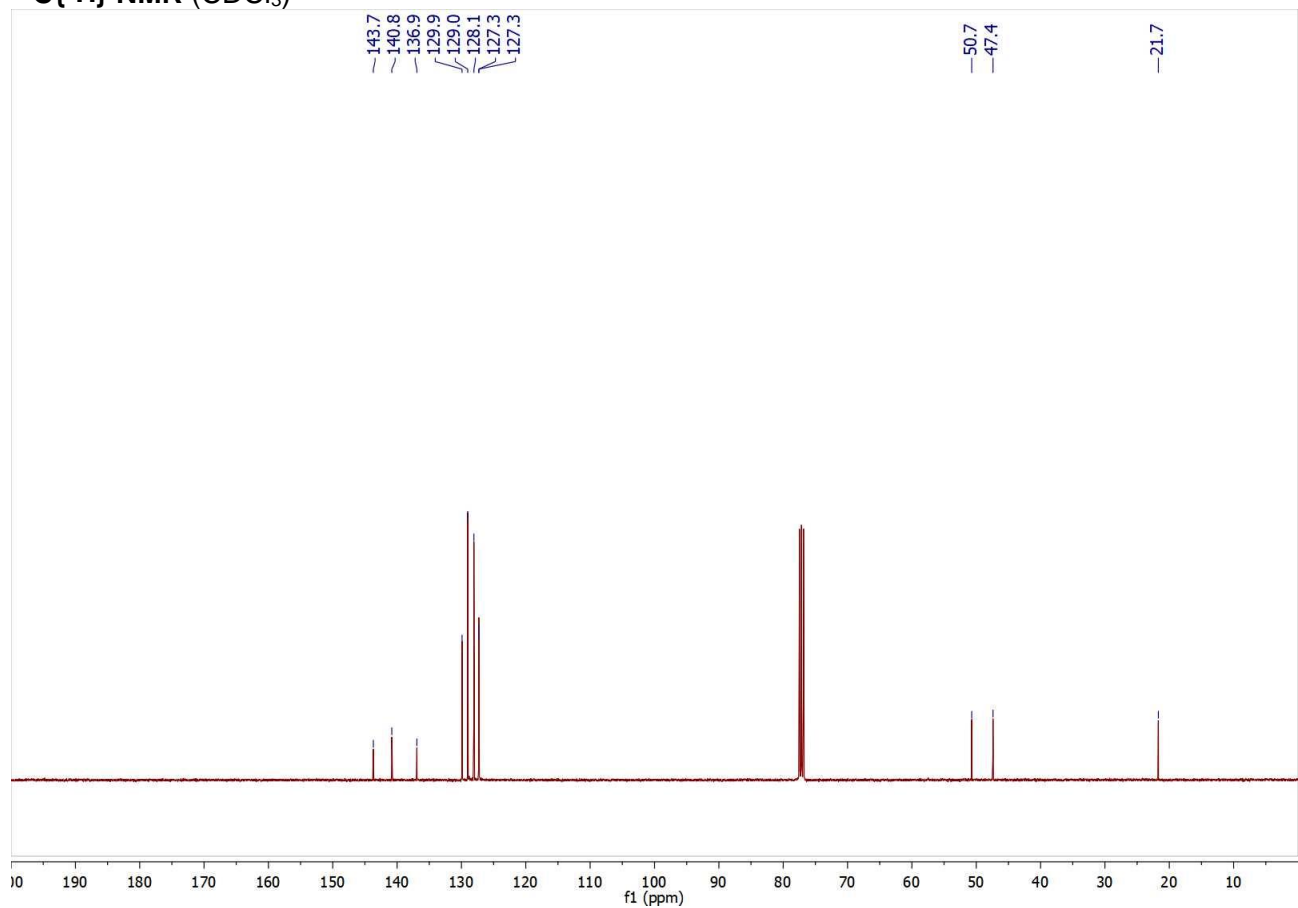

***N*-(1,3-Diphenylpropan-2-yl)-4-methylbenzensulfonamide (1j)**

<sup>1</sup>H NMR (CDCl<sub>3</sub>)

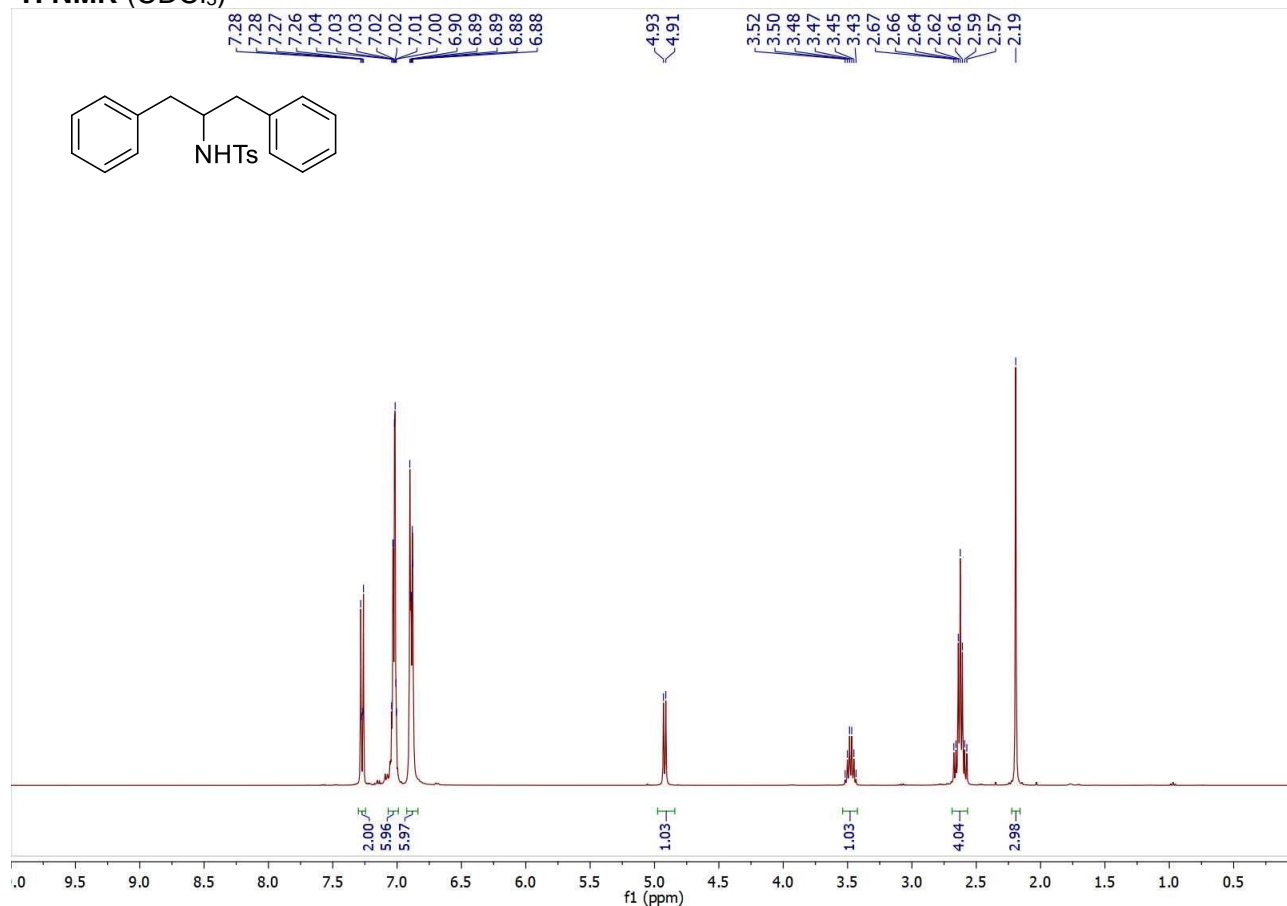

<sup>13</sup>C{<sup>1</sup>H} NMR (CDCl<sub>3</sub>)

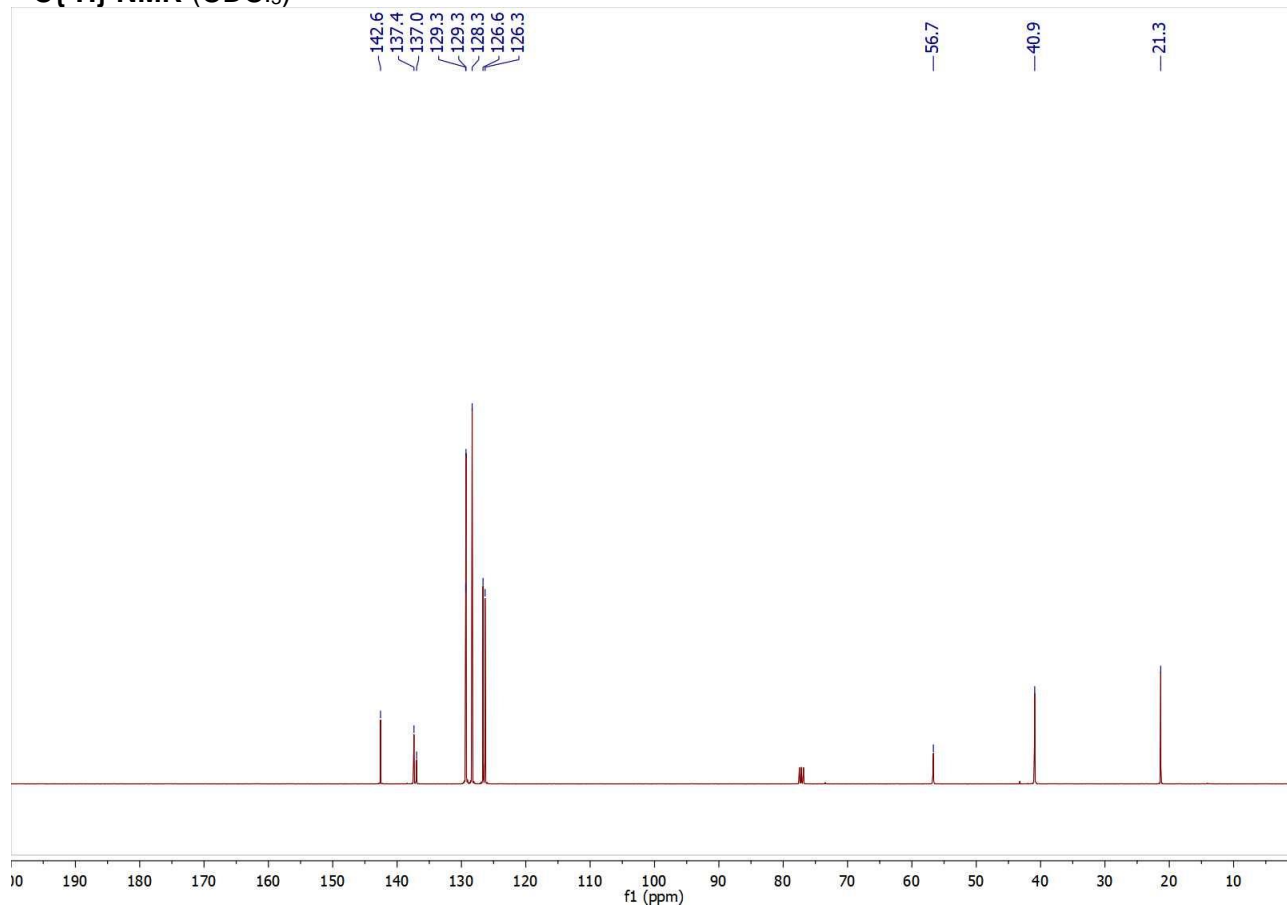

**(S)-N-(1-Hydroxy-3-phenylpropan-2-yl)-4-methylbenzensulfonamide (S3)**

**<sup>1</sup>H NMR (CDCl<sub>3</sub>)**

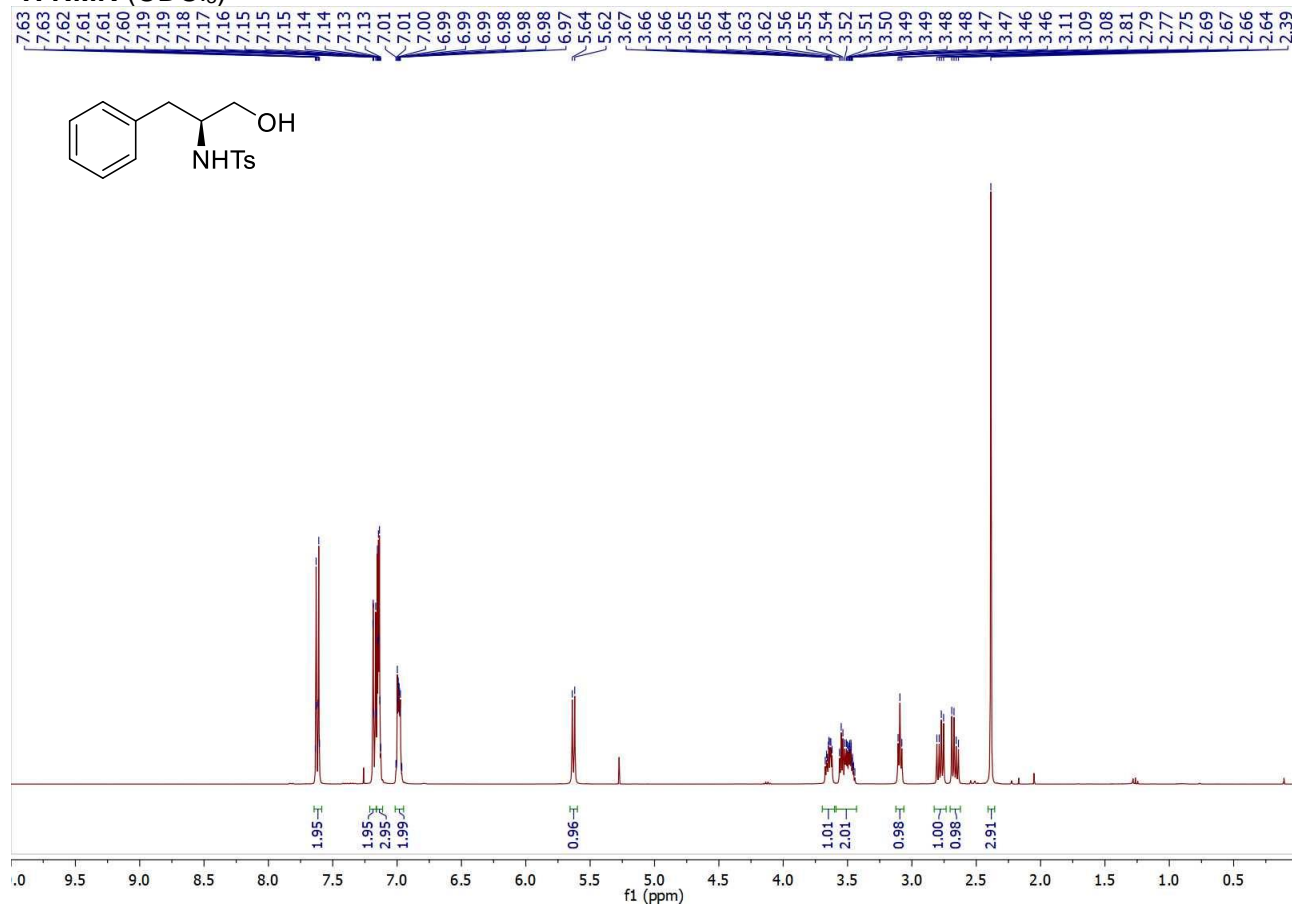

**<sup>13</sup>C{<sup>1</sup>H} NMR (CDCl<sub>3</sub>)**

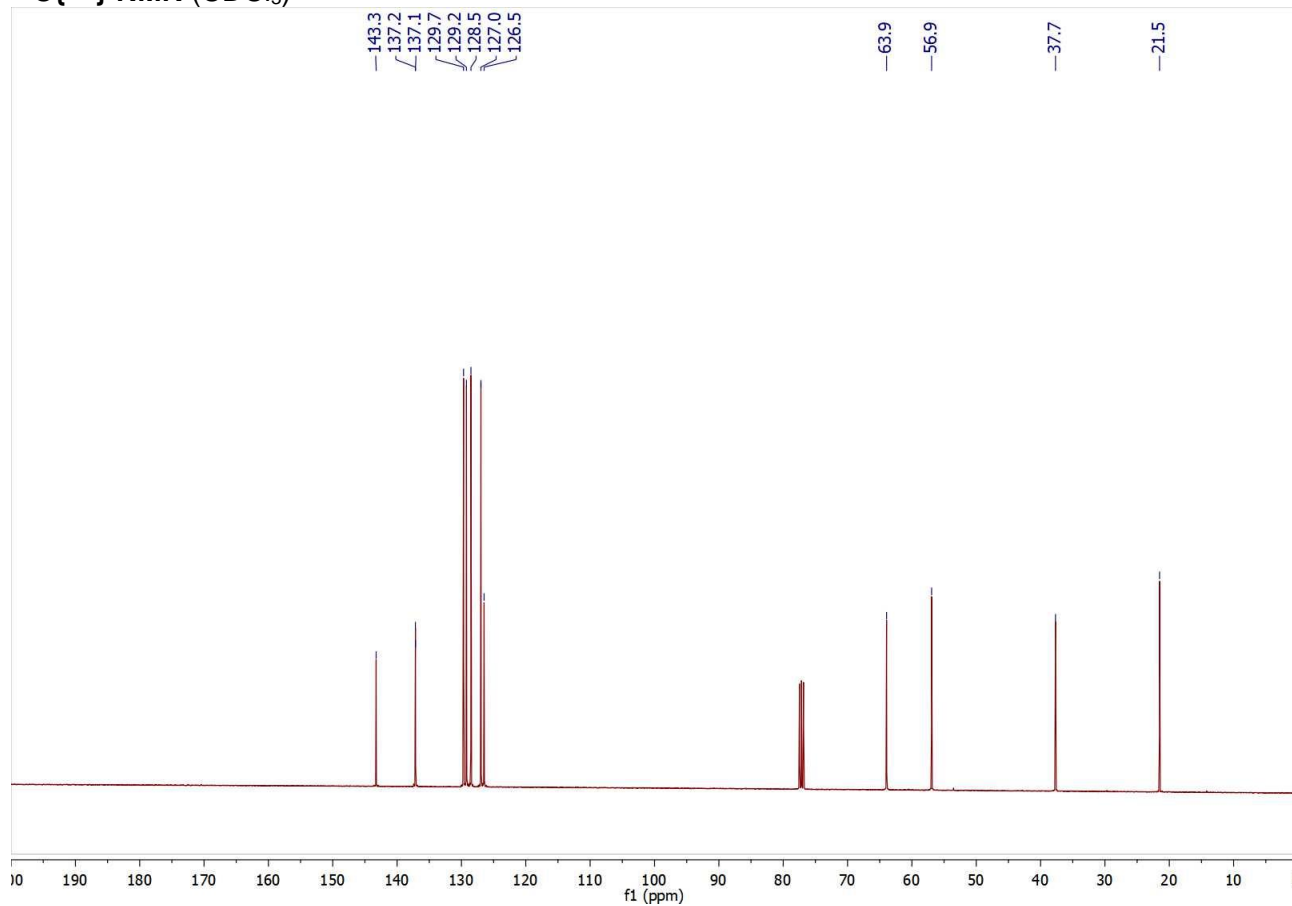

**(S)-N,N'-(3-Phenylpropane-1,2-diyl)bis(4-methylbenzensulfonamide) (1k)**

**<sup>1</sup>H NMR (CDCl<sub>3</sub>)**

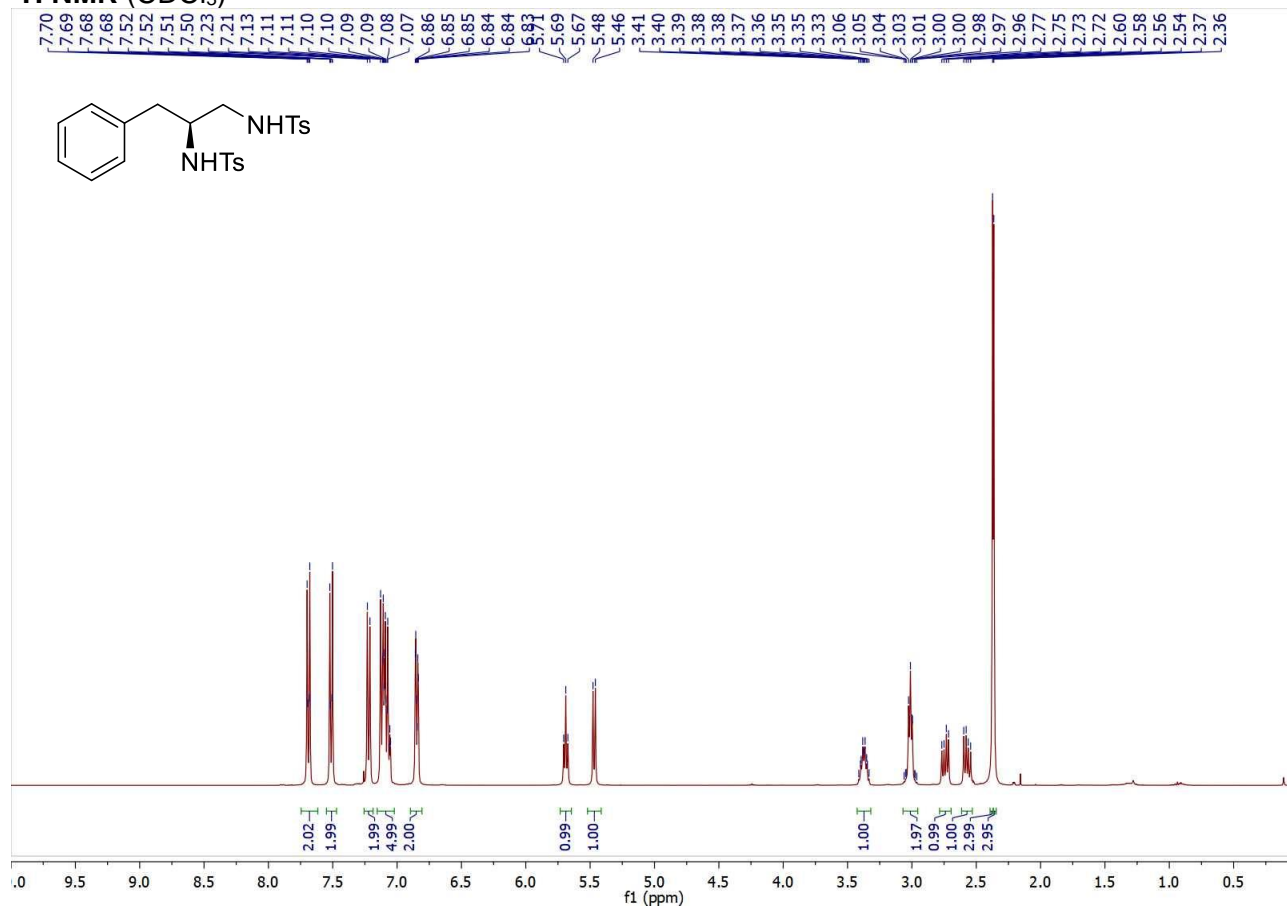

**<sup>13</sup>C{<sup>1</sup>H} NMR (CDCl<sub>3</sub>)**

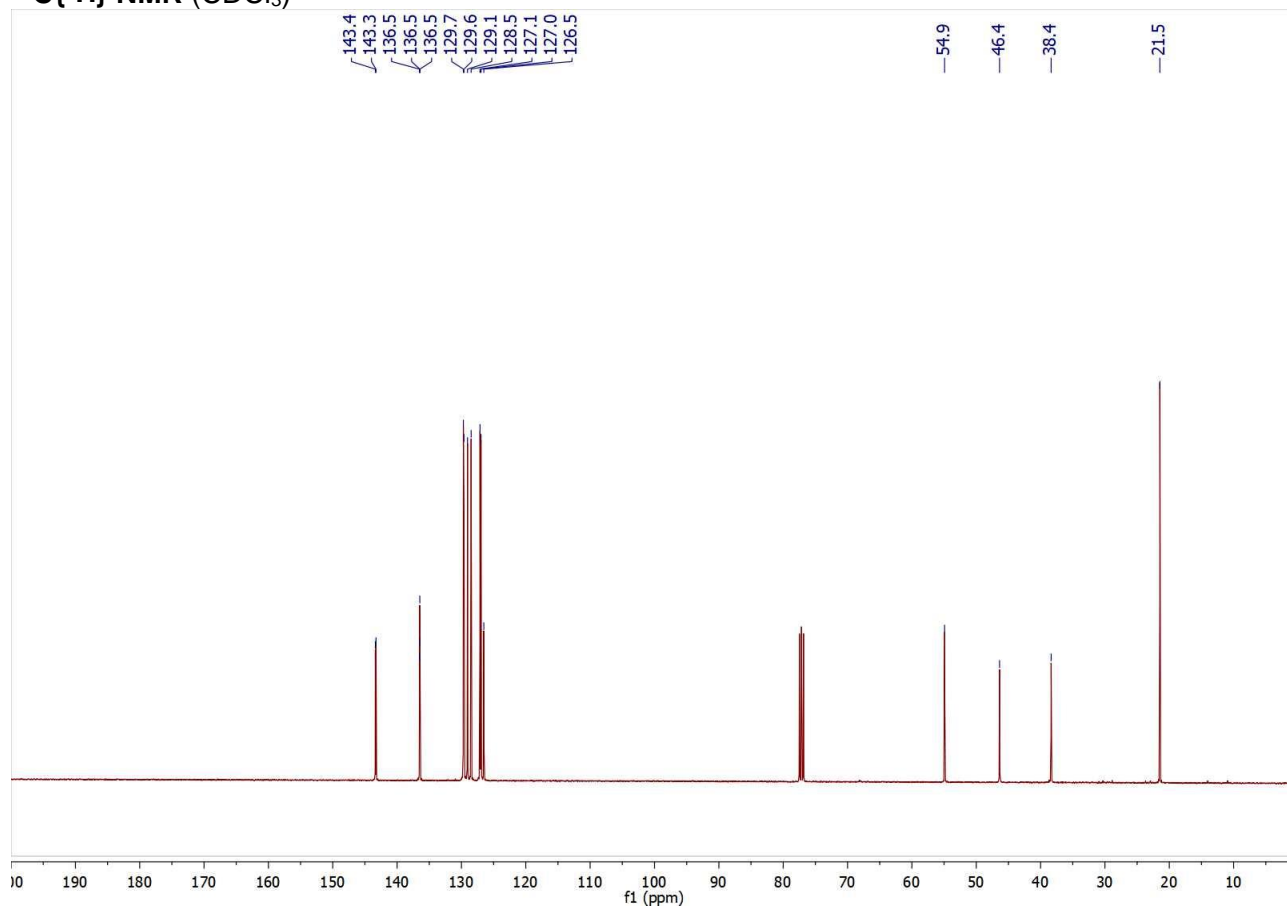

**(S)-N-(1-Azido-3-phenylpropan-2-yl)-4-methylbenzensulfonamide (1l)**

<sup>1</sup>H NMR (CDCl<sub>3</sub>)

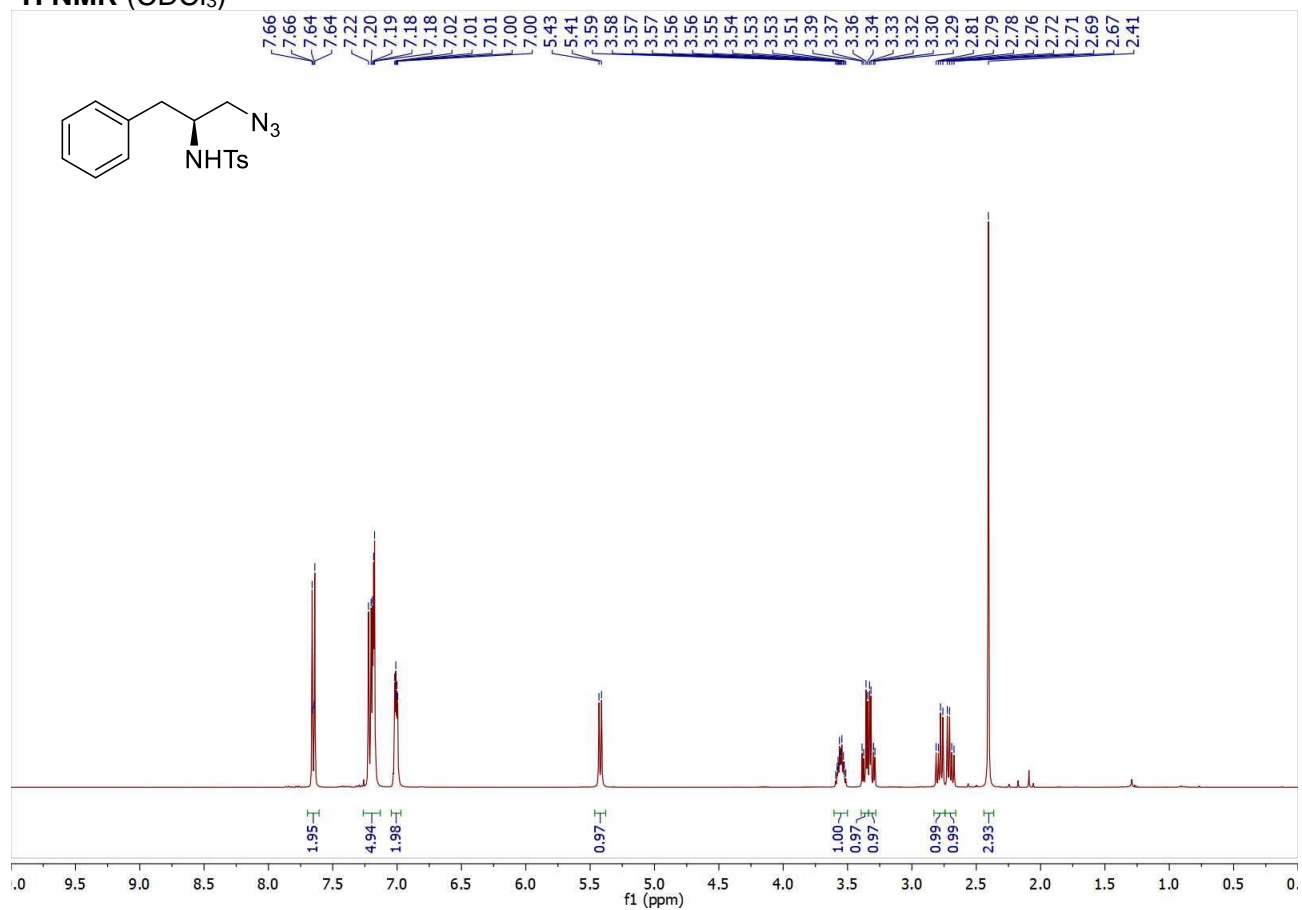

<sup>13</sup>C{<sup>1</sup>H} NMR (CDCl<sub>3</sub>)

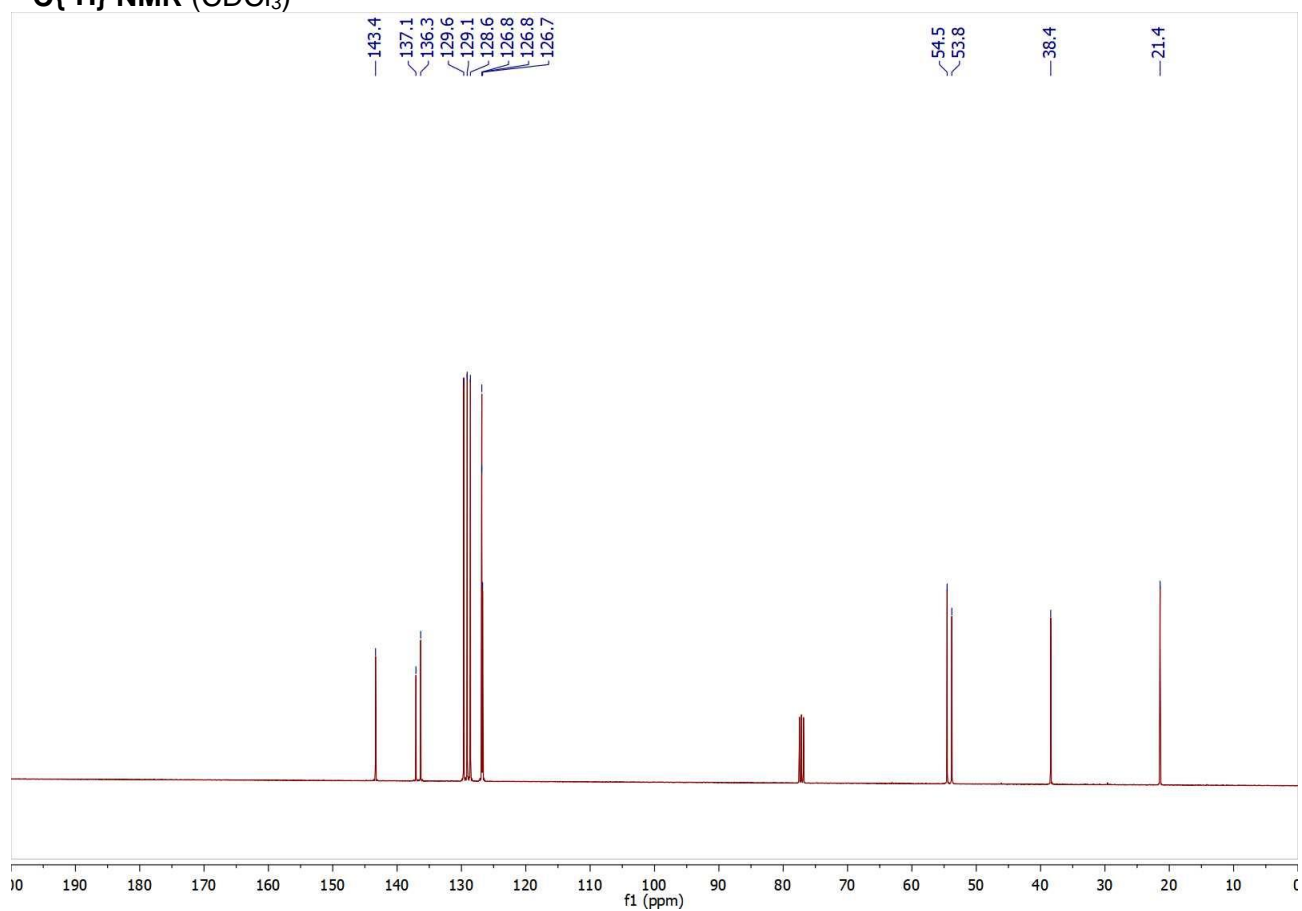

**(S)-N-(-1-((*tert*-Butyldiphenylsilyl)oxy)-3-phenylpropan-2-yl)-4-methylbenzensulfonamide (1m)**

**<sup>1</sup>H NMR (CDCl<sub>3</sub>)**

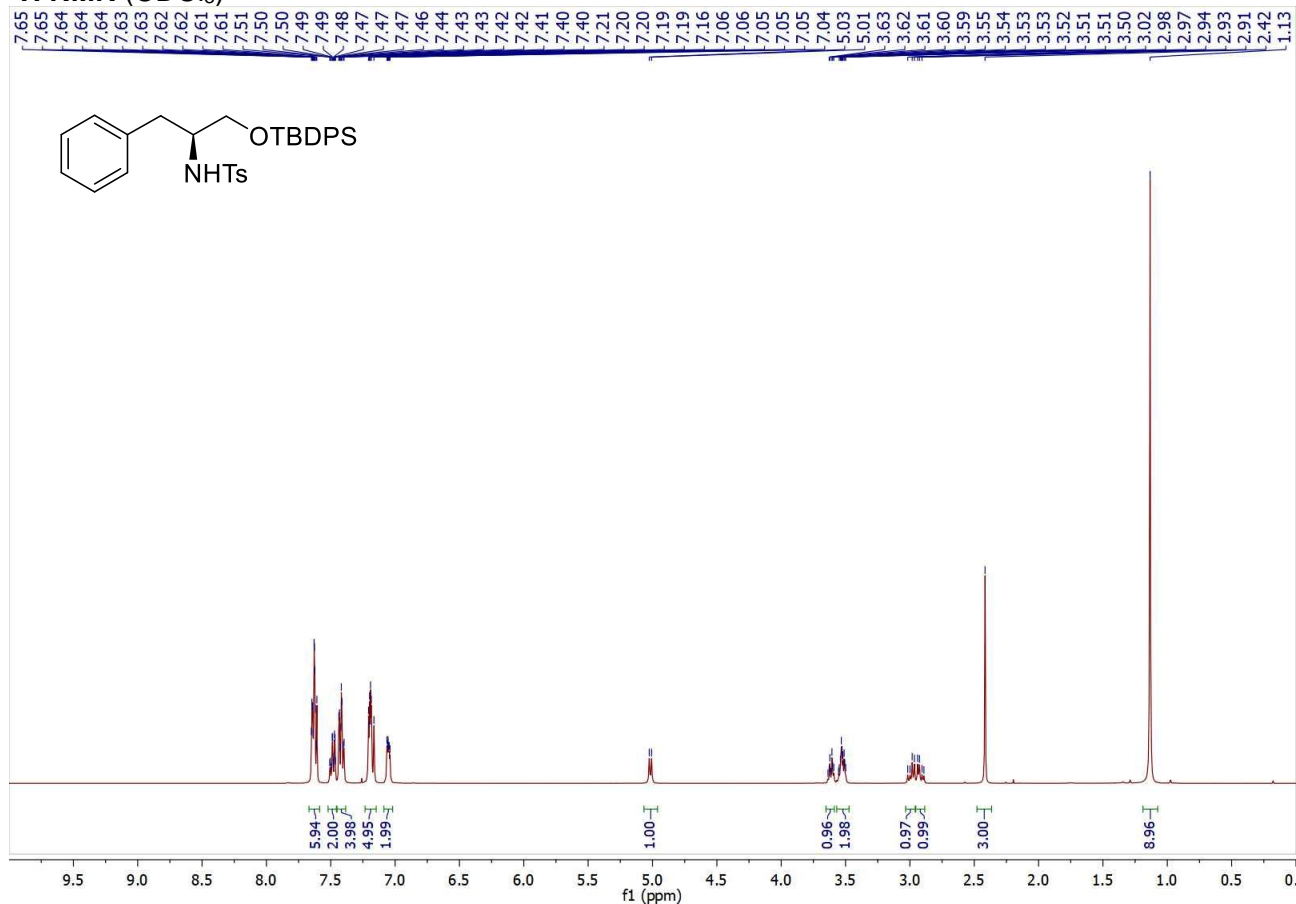

**<sup>13</sup>C{<sup>1</sup>H} NMR (CDCl<sub>3</sub>)**

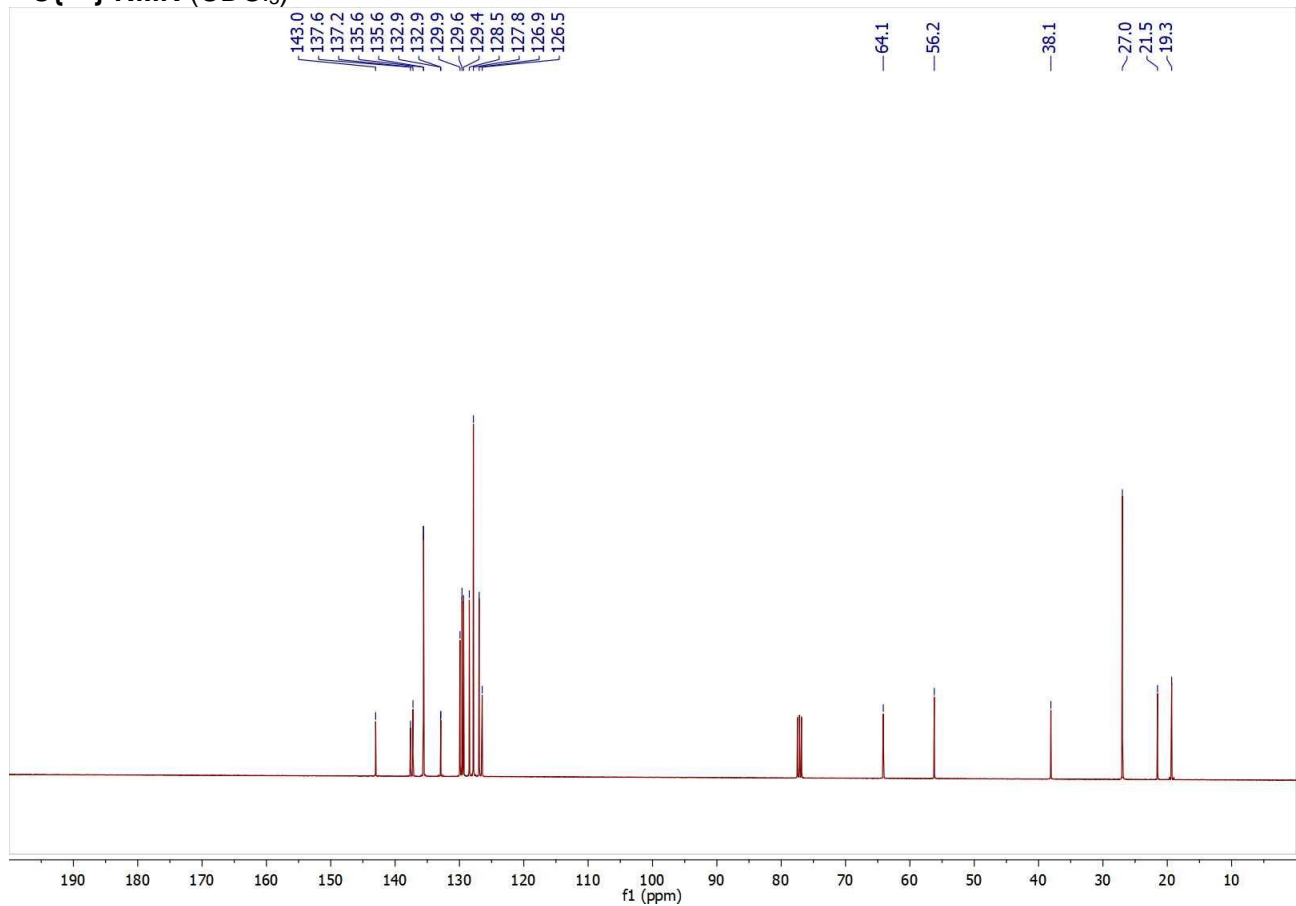

**(S)-2-((4-Methylphenyl)sulfonamido)-3-phenylpropyl acetate (1n)**

<sup>1</sup>H NMR (CDCl<sub>3</sub>)

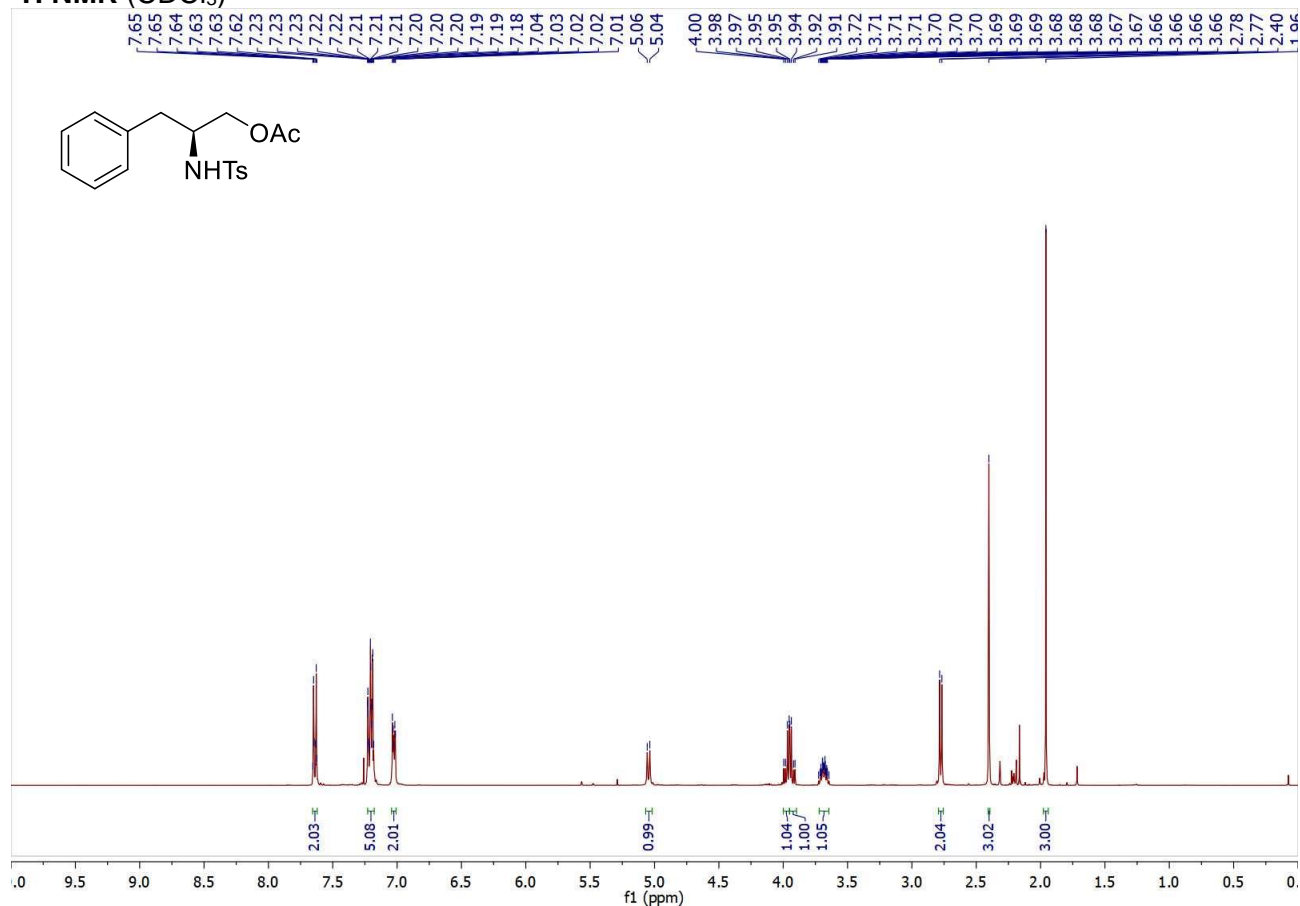

<sup>13</sup>C{<sup>1</sup>H} NMR (CDCl<sub>3</sub>)

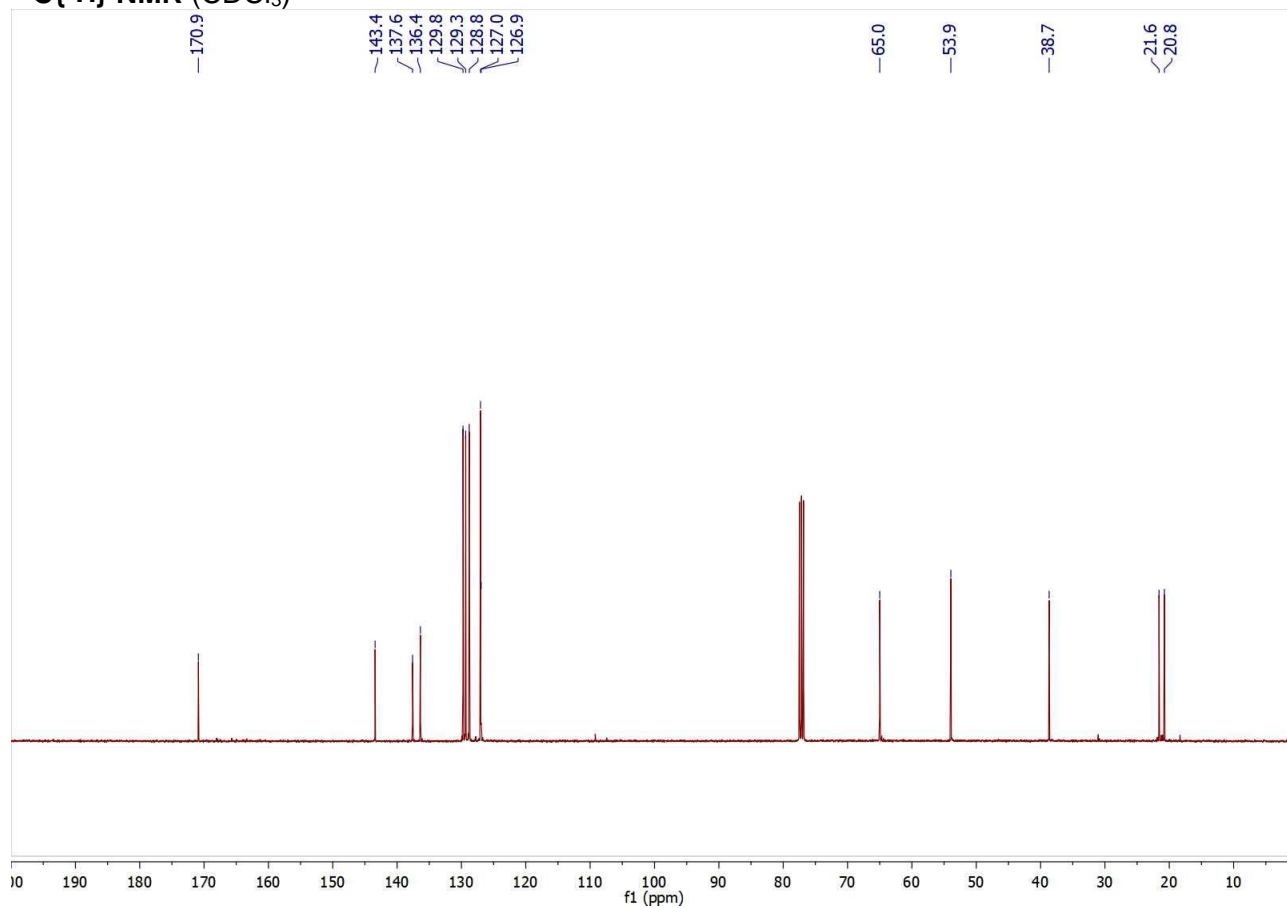



**(S)-N-(1-Bromo-3-phenylpropan-2-yl)-4-methylbenzensulfonamide (1o)**

<sup>1</sup>H NMR (CDCl<sub>3</sub>)

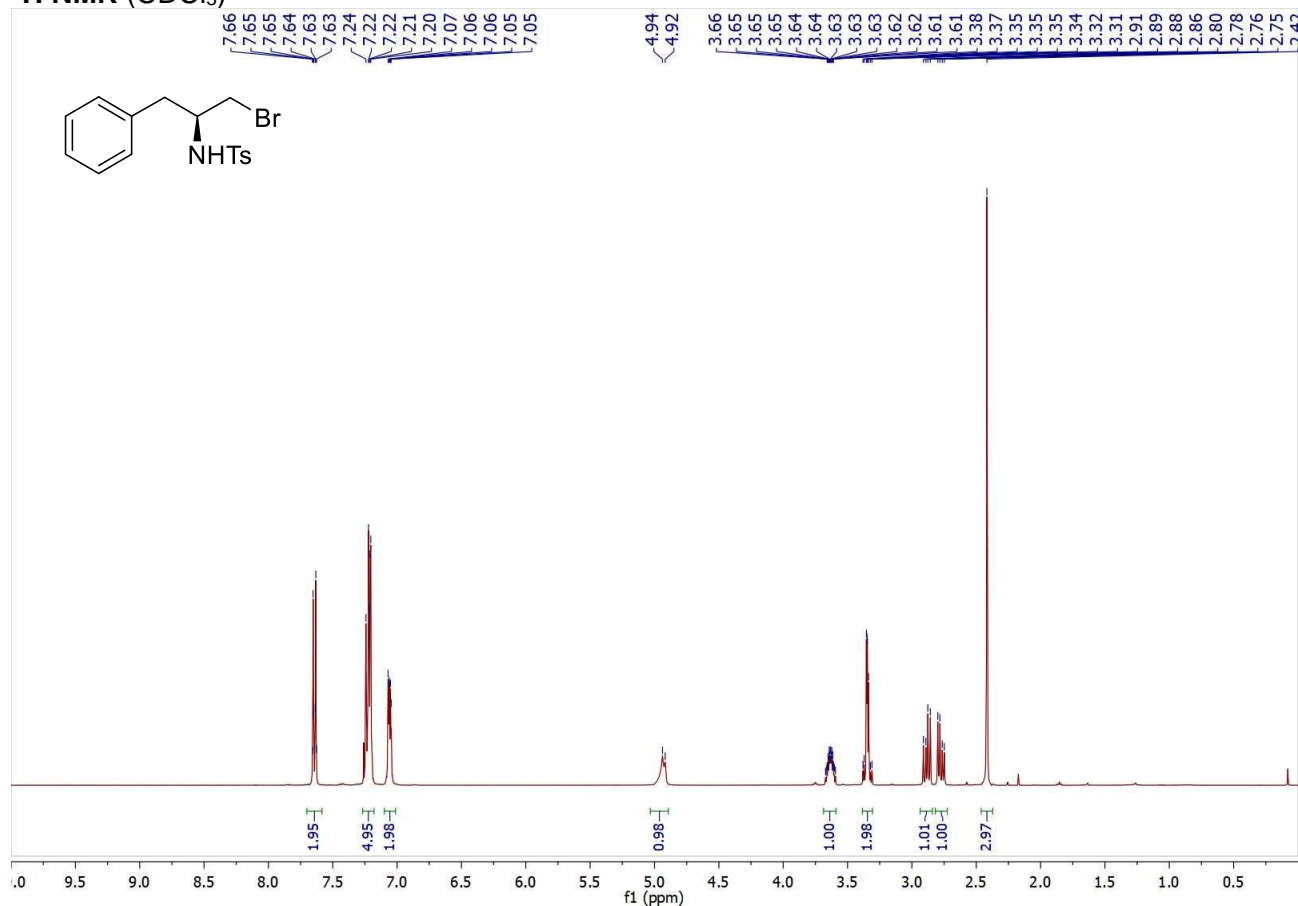

<sup>13</sup>C{<sup>1</sup>H} NMR (CDCl<sub>3</sub>)

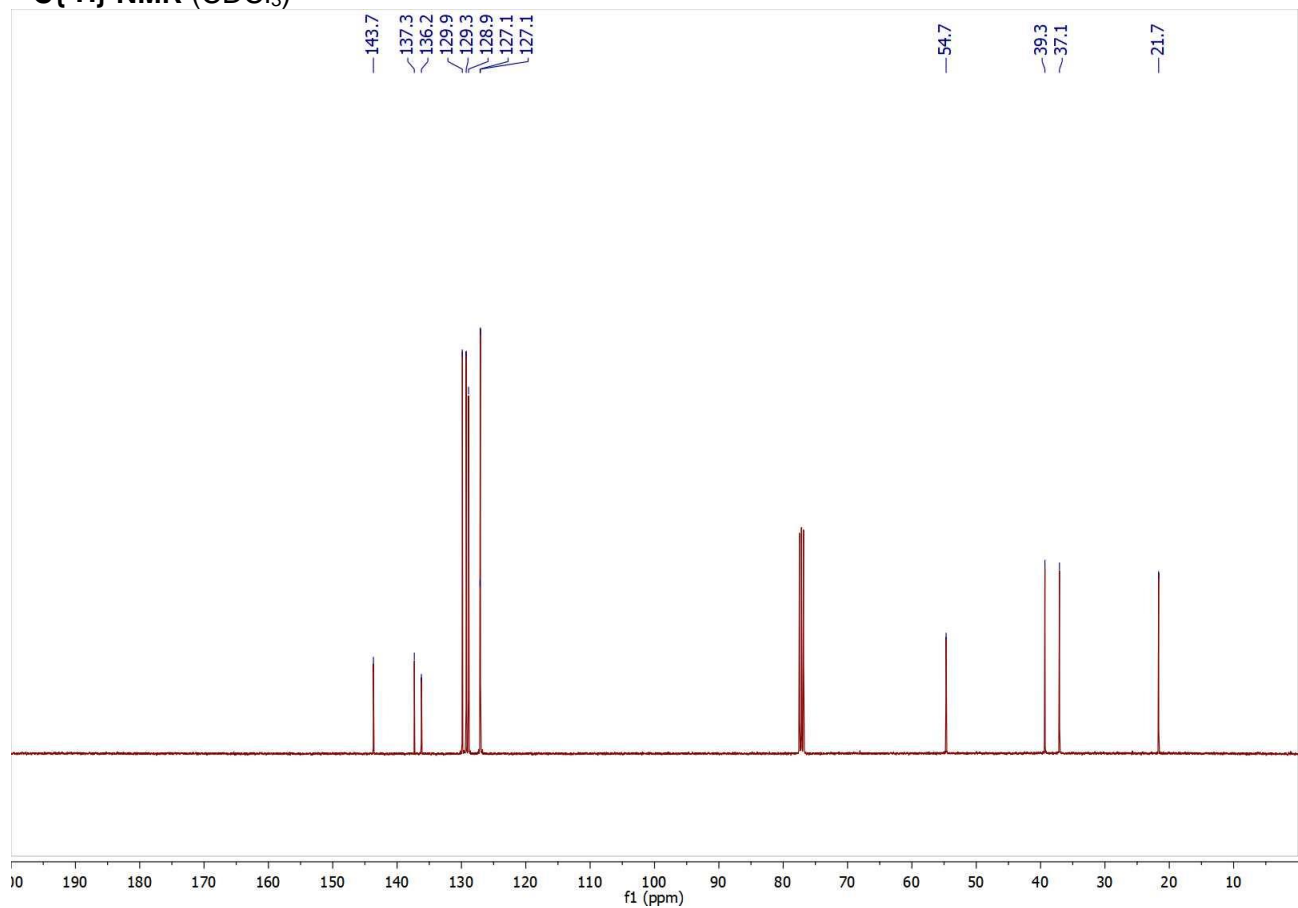

**(S)-N-(1-(1,1-Dioxo-3-oxobenzo[d]isothiazol-2(3H)-yl)-3-phenylpropan-2-yl)-4-methylbenzenesulfonamide (1p)**

**<sup>1</sup>H NMR (CDCl<sub>3</sub>)**

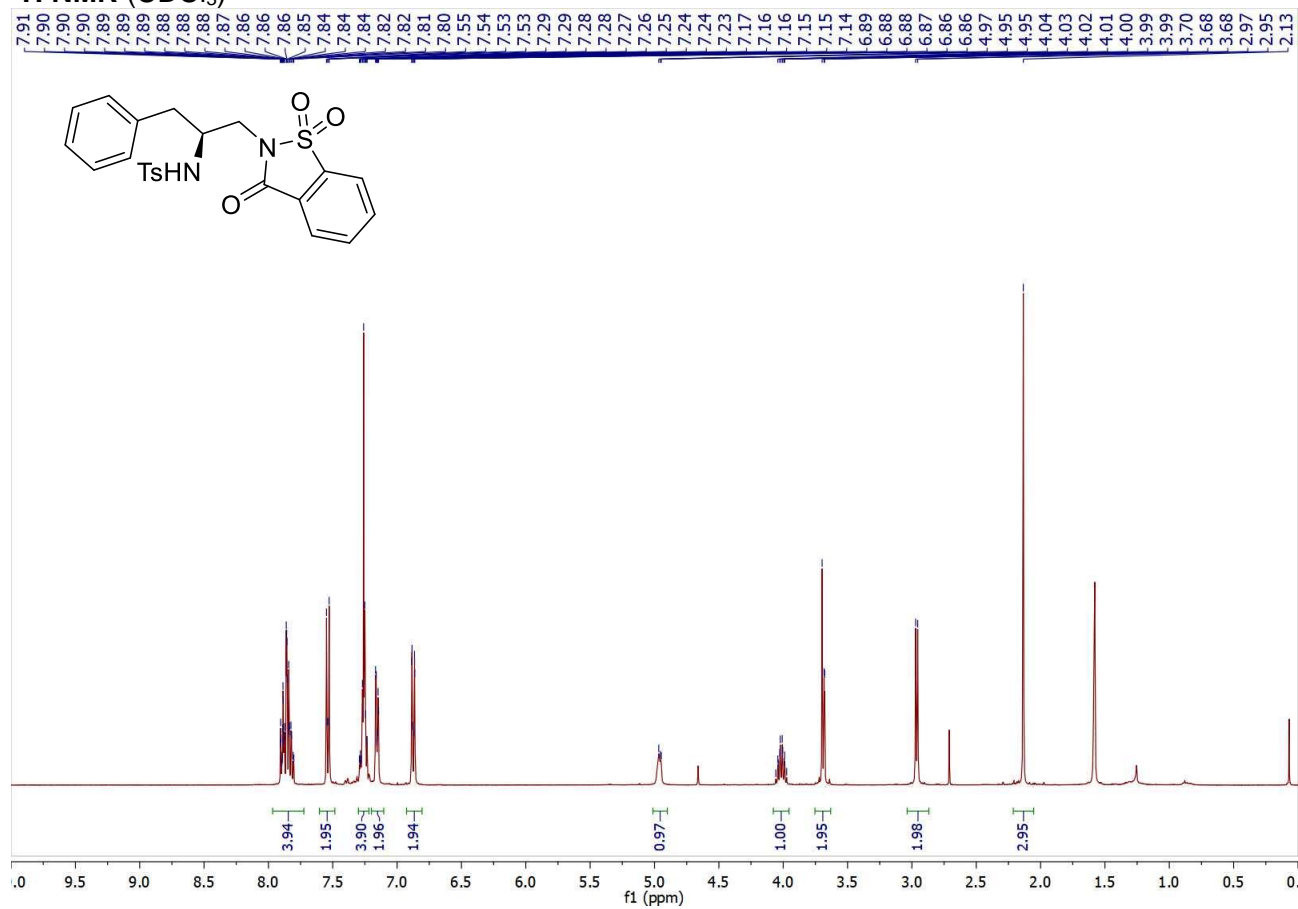

**<sup>13</sup>C{<sup>1</sup>H} NMR (CDCl<sub>3</sub>)**

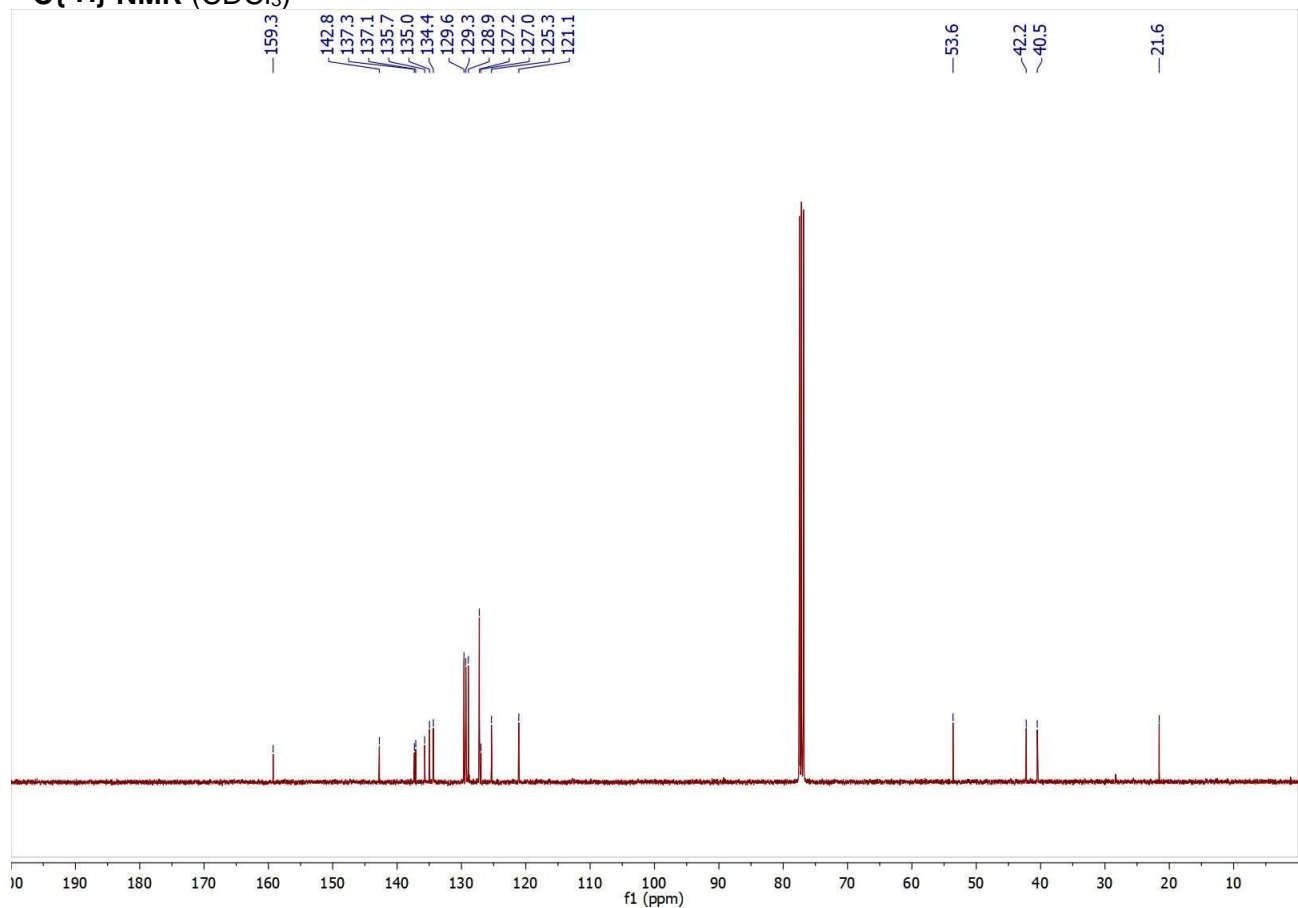

**(S)-2-((4-Methylphenyl)sulfonamido)-3-phenylpropyl (S)-2-(4-isobutylphenyl)propanoate (1q)**

**<sup>1</sup>H NMR (CDCl<sub>3</sub>)**

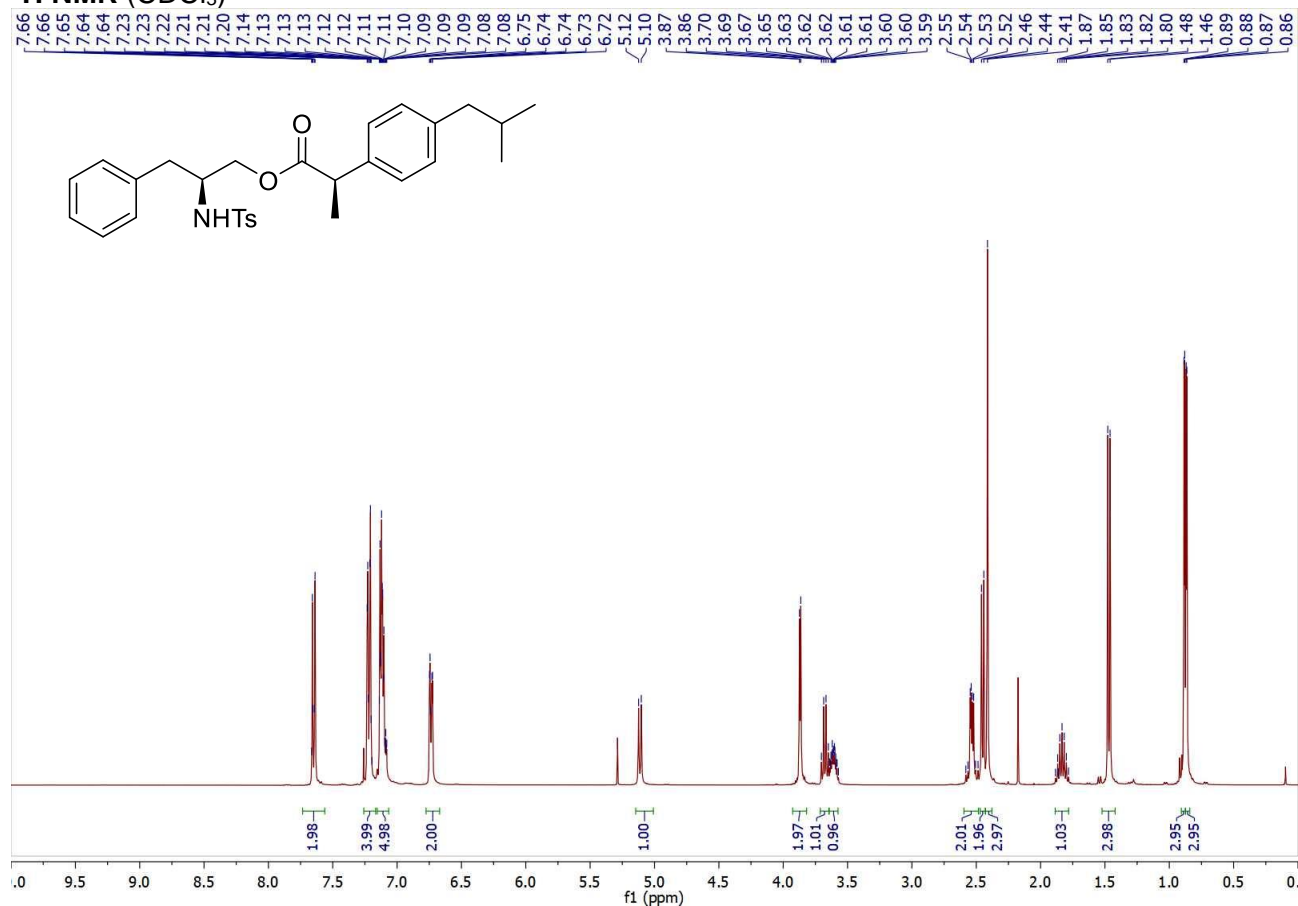

**Ethyl 2-methyl-2-(4-methylphenylsulfonamido)-3-phenylpropanoate (1r)**

**<sup>1</sup>H NMR (CDCl<sub>3</sub>)**

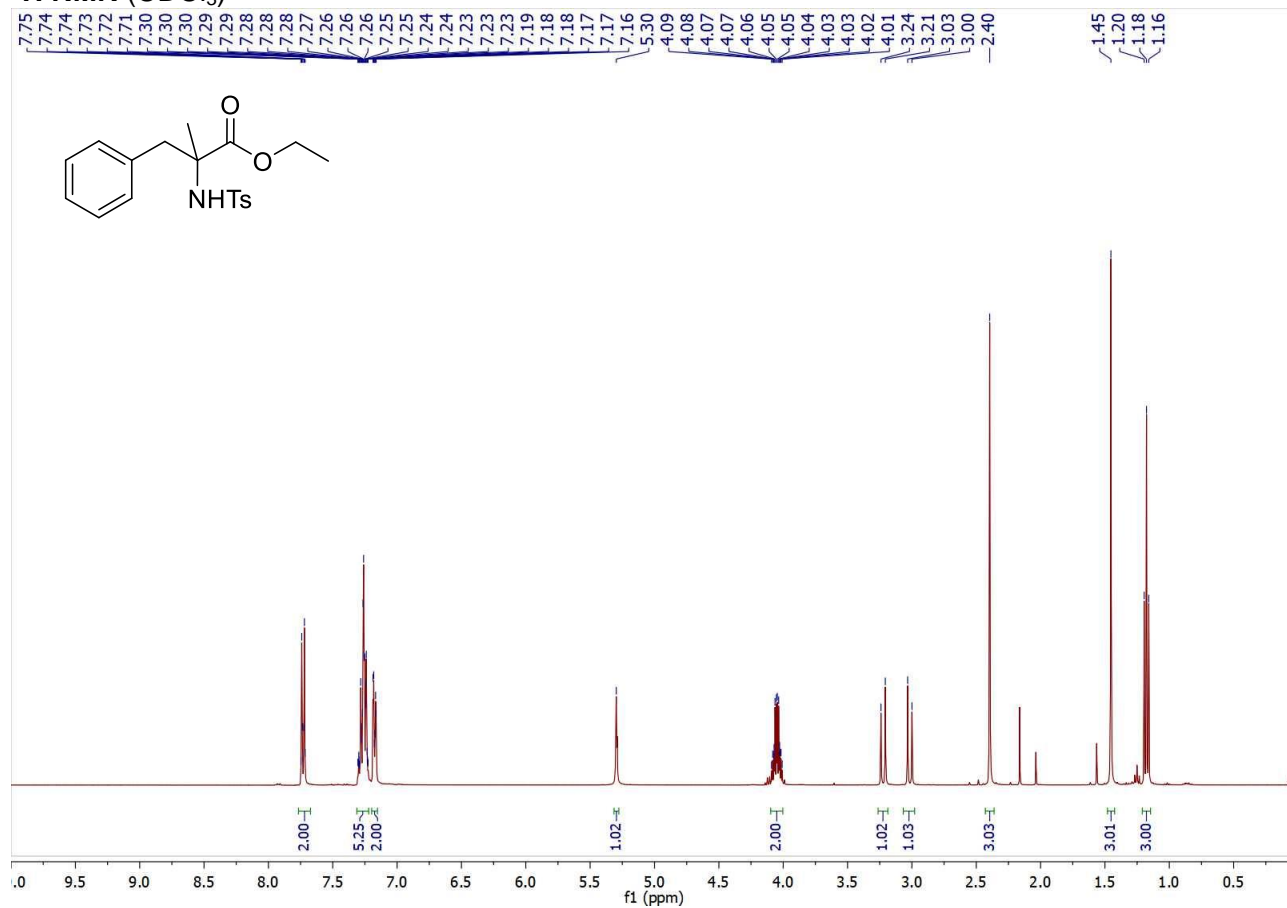

**<sup>13</sup>C{<sup>1</sup>H} NMR (CDCl<sub>3</sub>)**

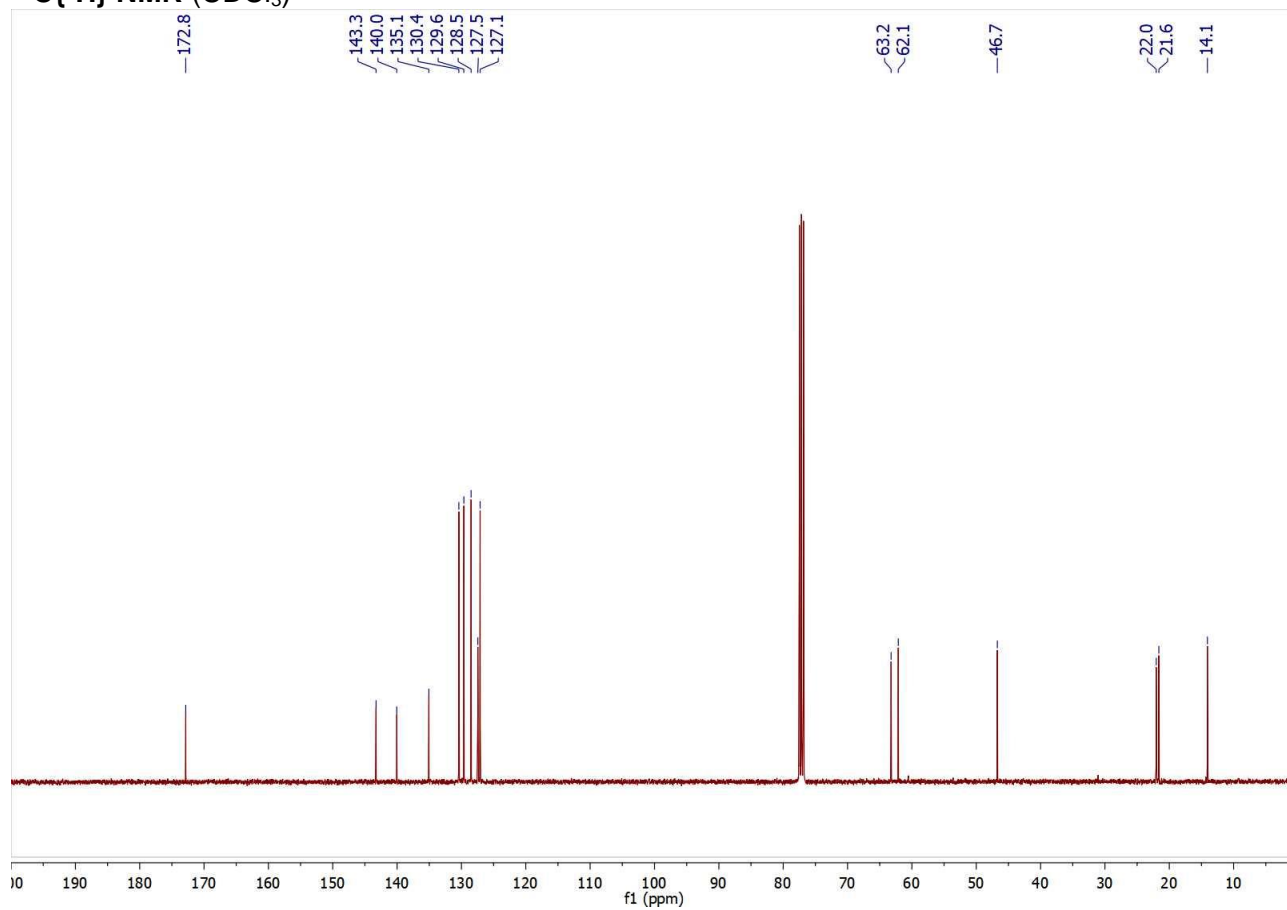

**(S)-Ethyl-2-(*N*,4-Dimethylphenylsulfonamido)-3-phenylpropanoate (1s)**

<sup>1</sup>H NMR (CDCl<sub>3</sub>)

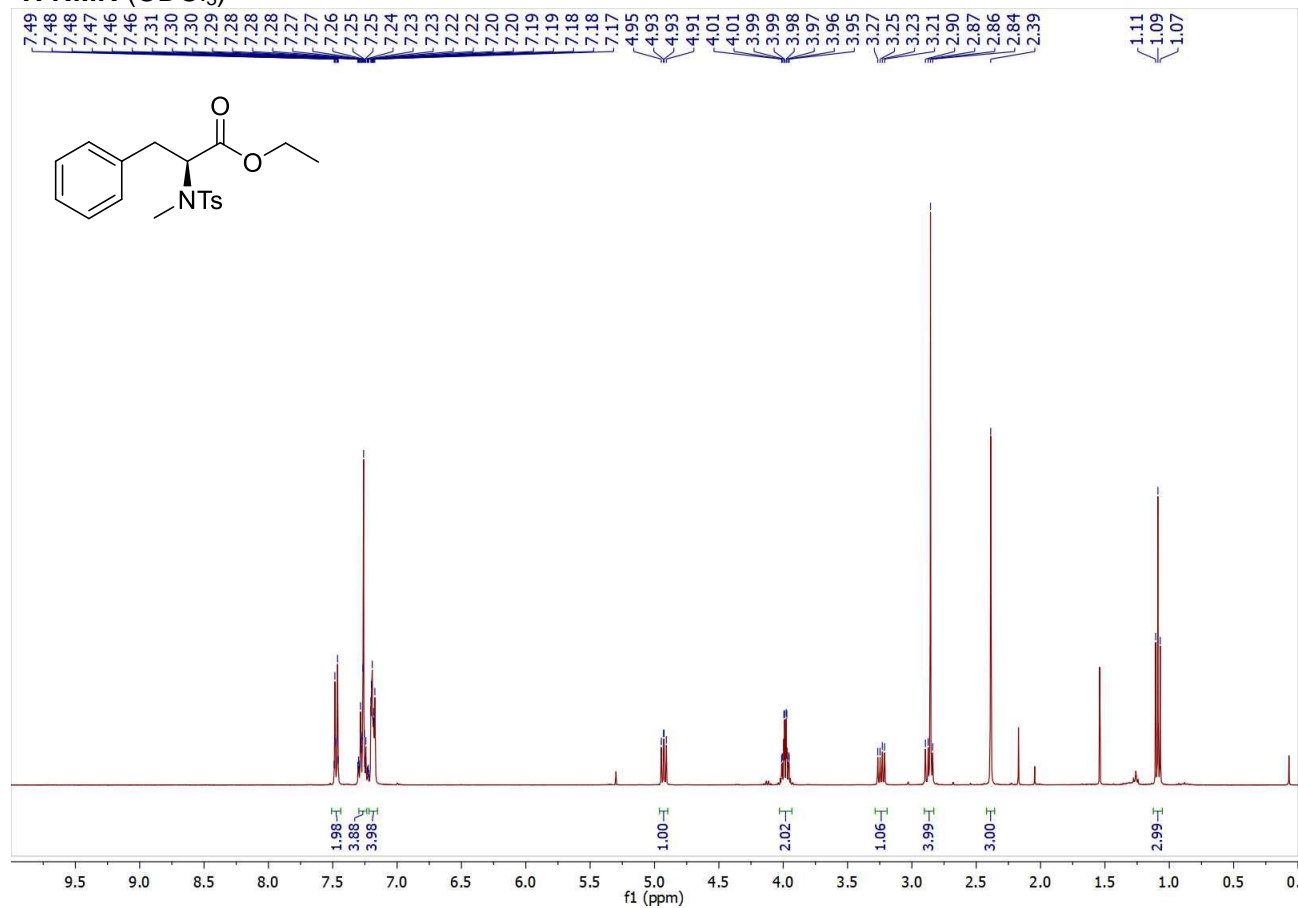

<sup>13</sup>C{<sup>1</sup>H} NMR (CDCl<sub>3</sub>)

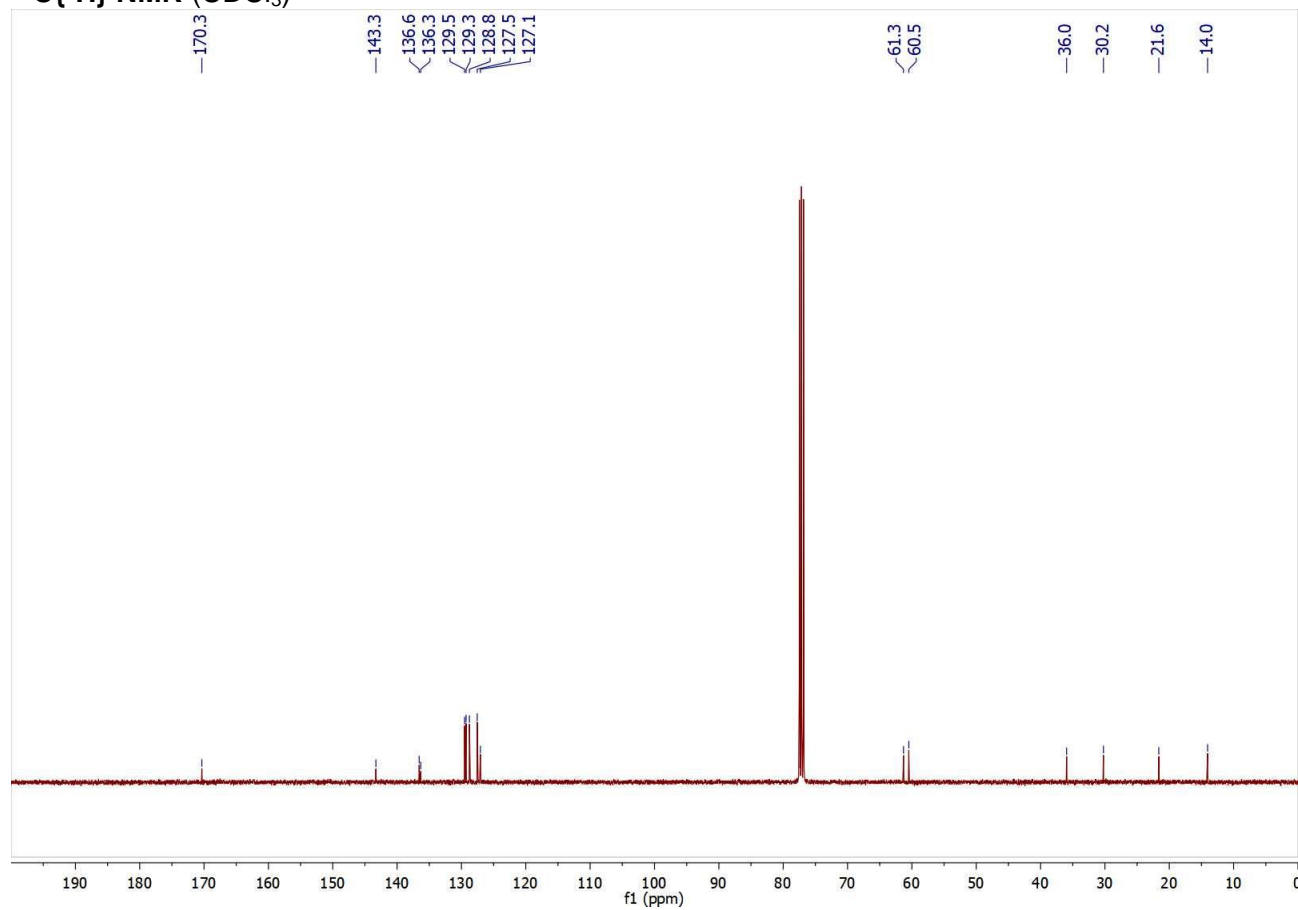

# **Ethyl 2-(4-methylsulfonamido)pent-4-enoate (1t)**

**<sup>1</sup>H NMR (CDCl<sub>3</sub>)**

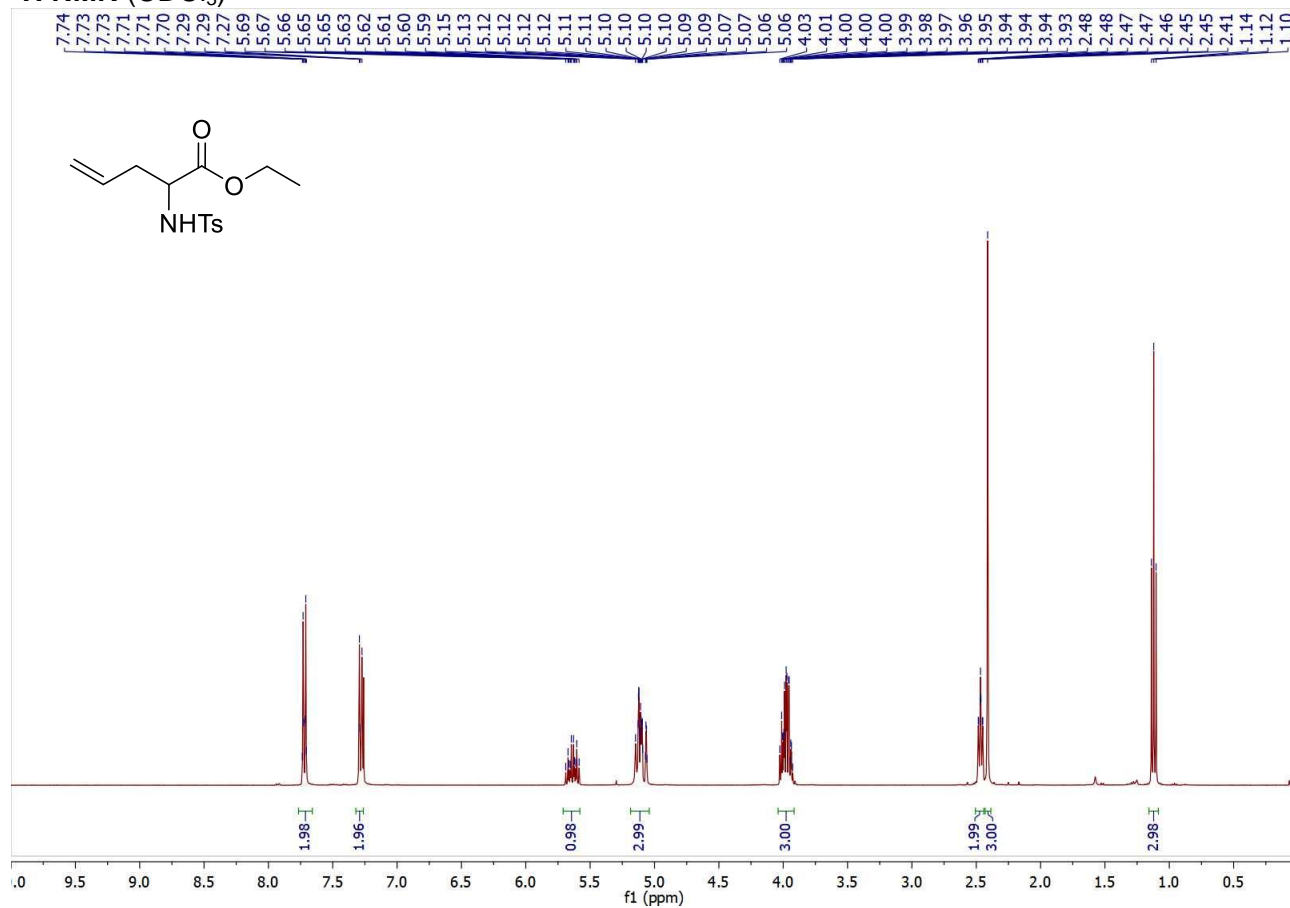

**<sup>13</sup>C{<sup>1</sup>H} NMR (CDCl<sub>3</sub>)**

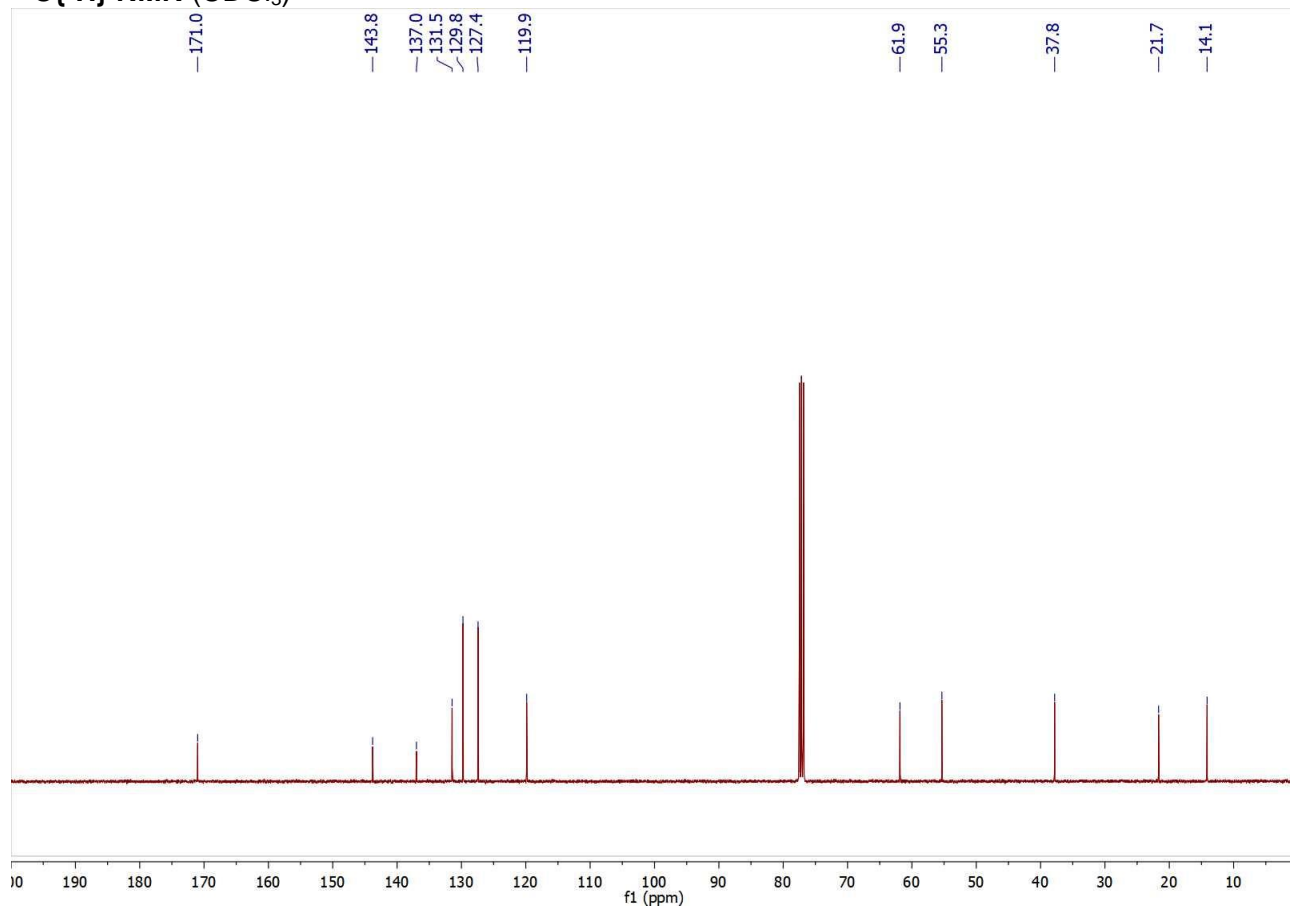

**Methyl (S)-3,3-dimethyl-2-((4-methylphenyl)sulfonamido)butanoate (1u)**

<sup>1</sup>H NMR (CDCl<sub>3</sub>)

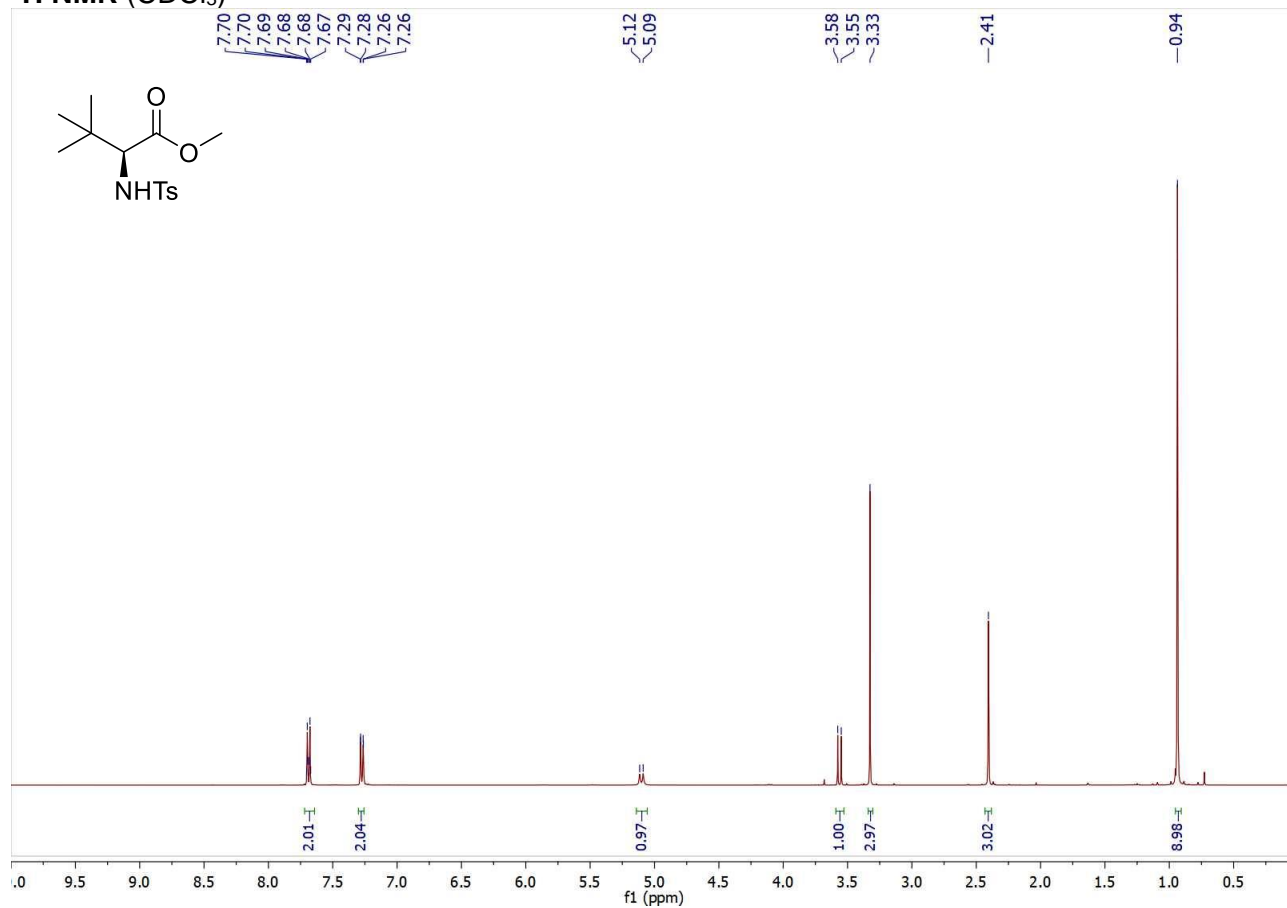

<sup>13</sup>C{<sup>1</sup>H} NMR (CDCl<sub>3</sub>)

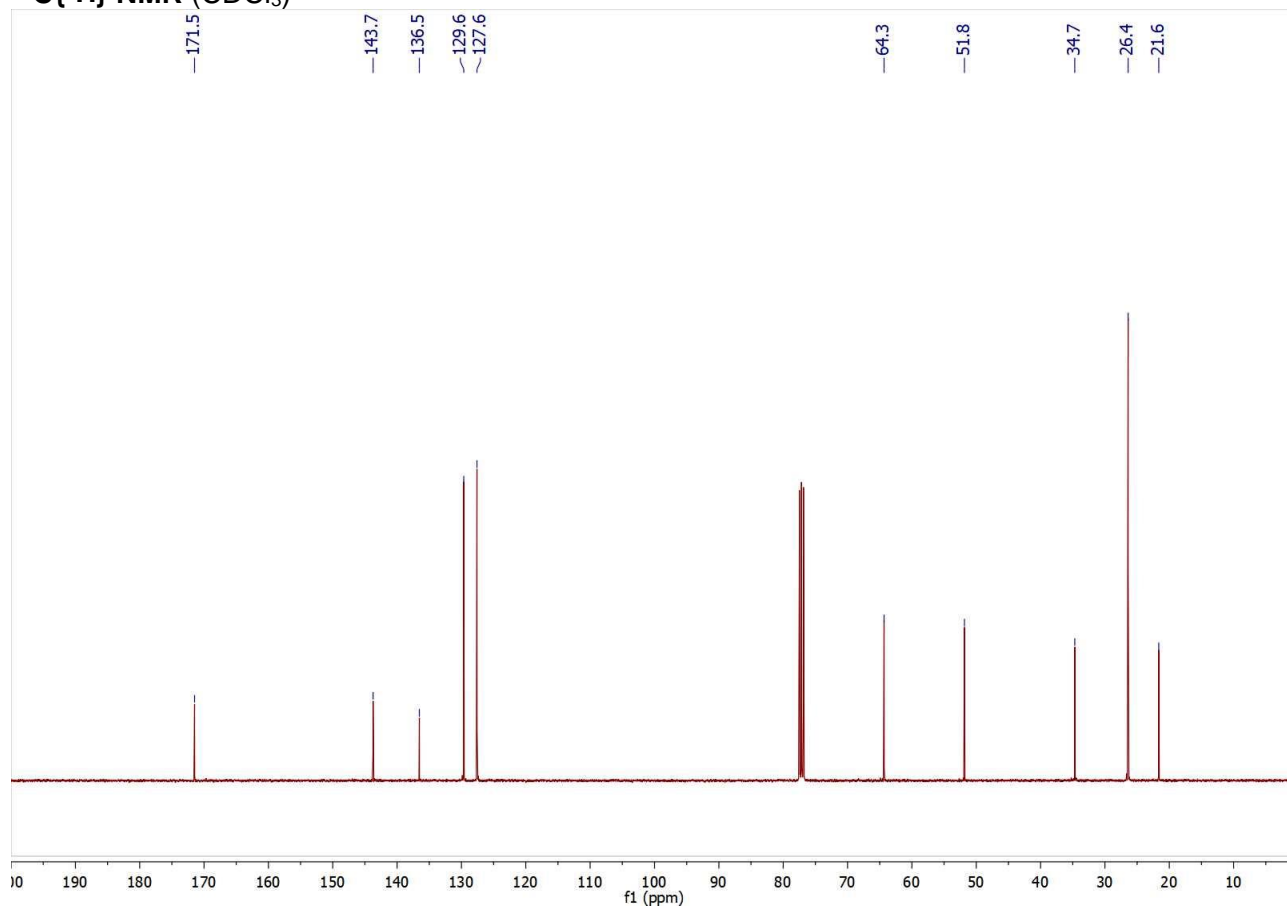

**Ethyl 2-(4-methylsulfonilamide) acetate (1v)**

$^1\text{H}$  NMR ( $\text{CDCl}_3$ )

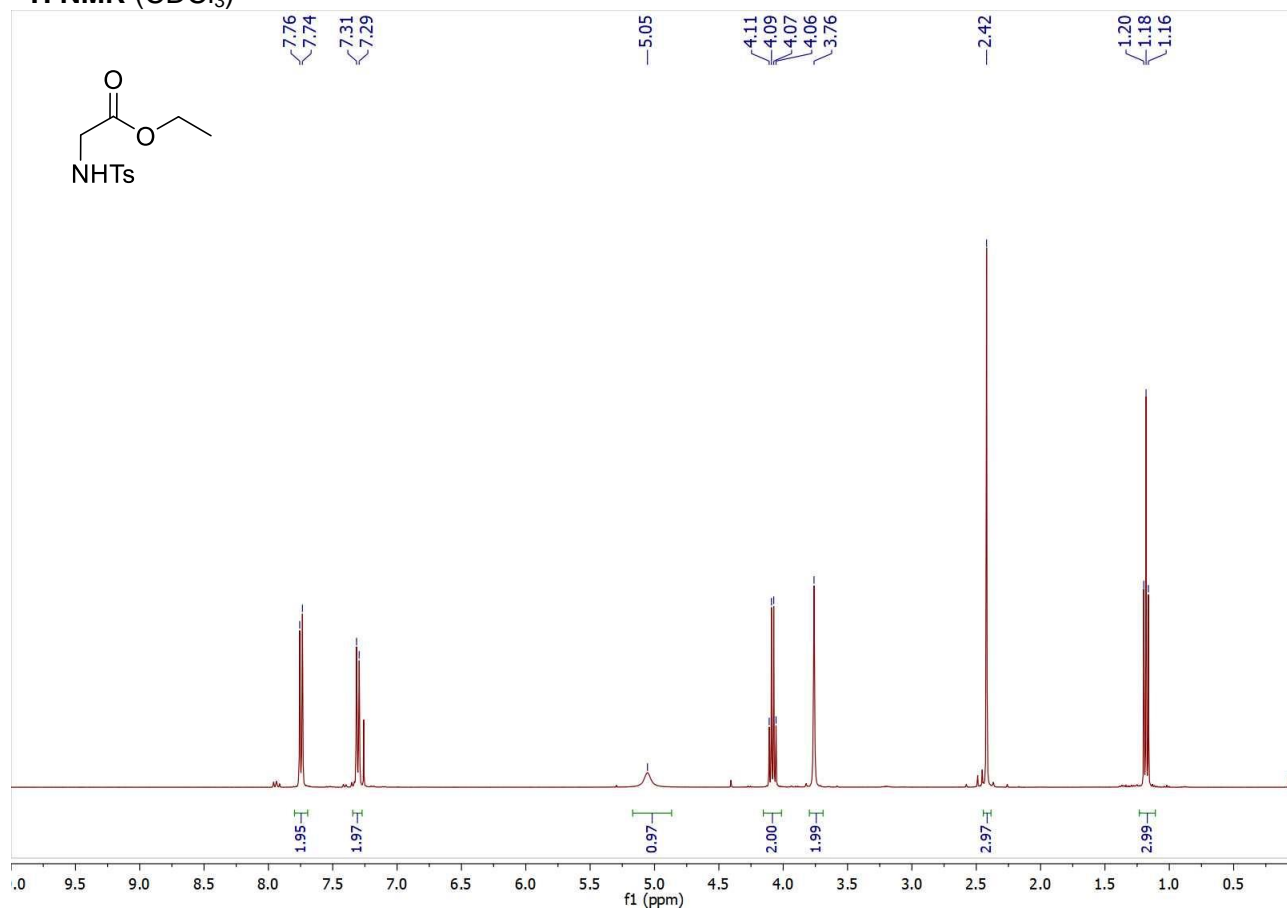

$^{13}\text{C}\{^1\text{H}\}$  NMR ( $\text{CDCl}_3$ )

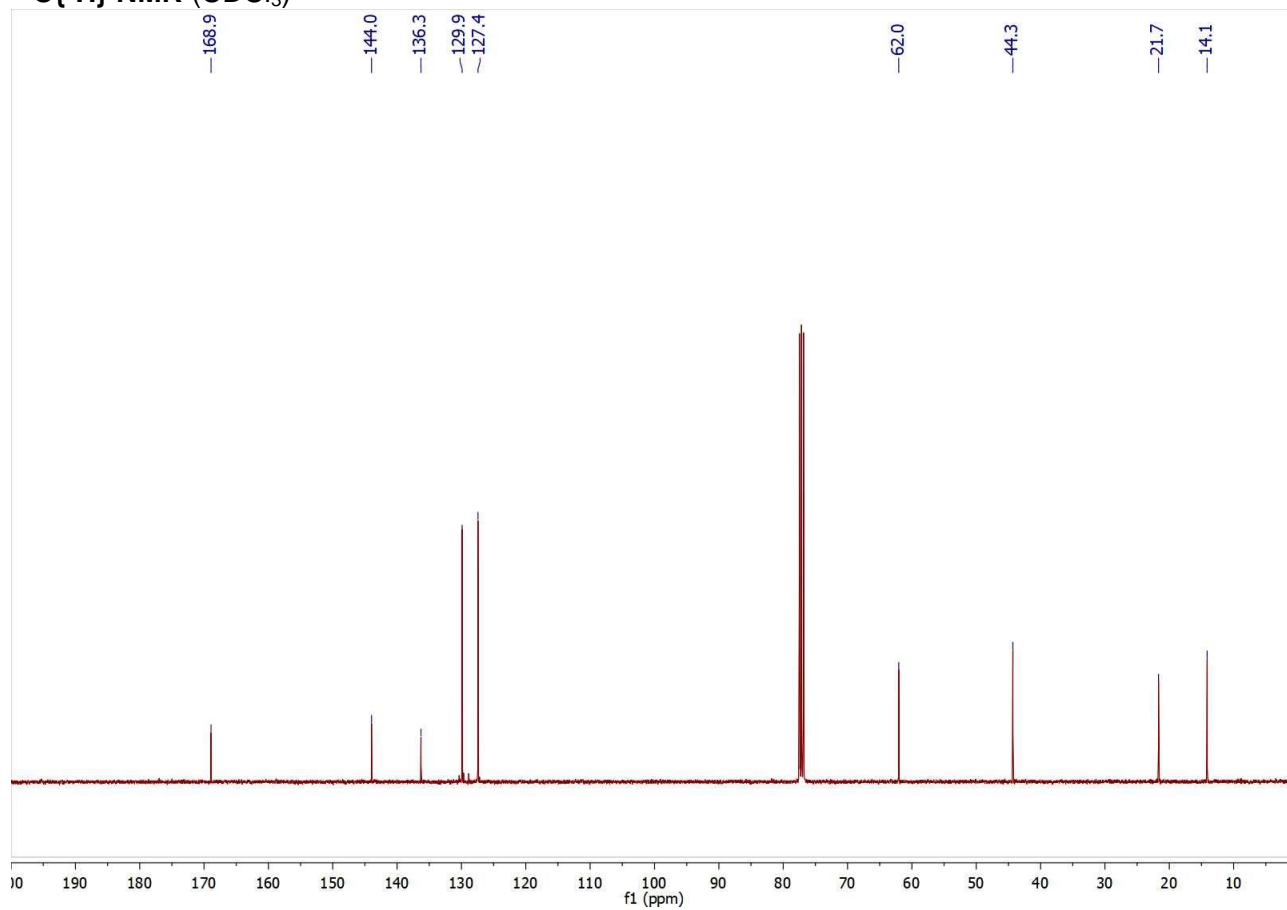



**Ethyl 2-((4-methylphenyl)sulfonamido)-2-phenylacetate (1w)**

**$^1\text{H}$  NMR ( $\text{CDCl}_3$ )**

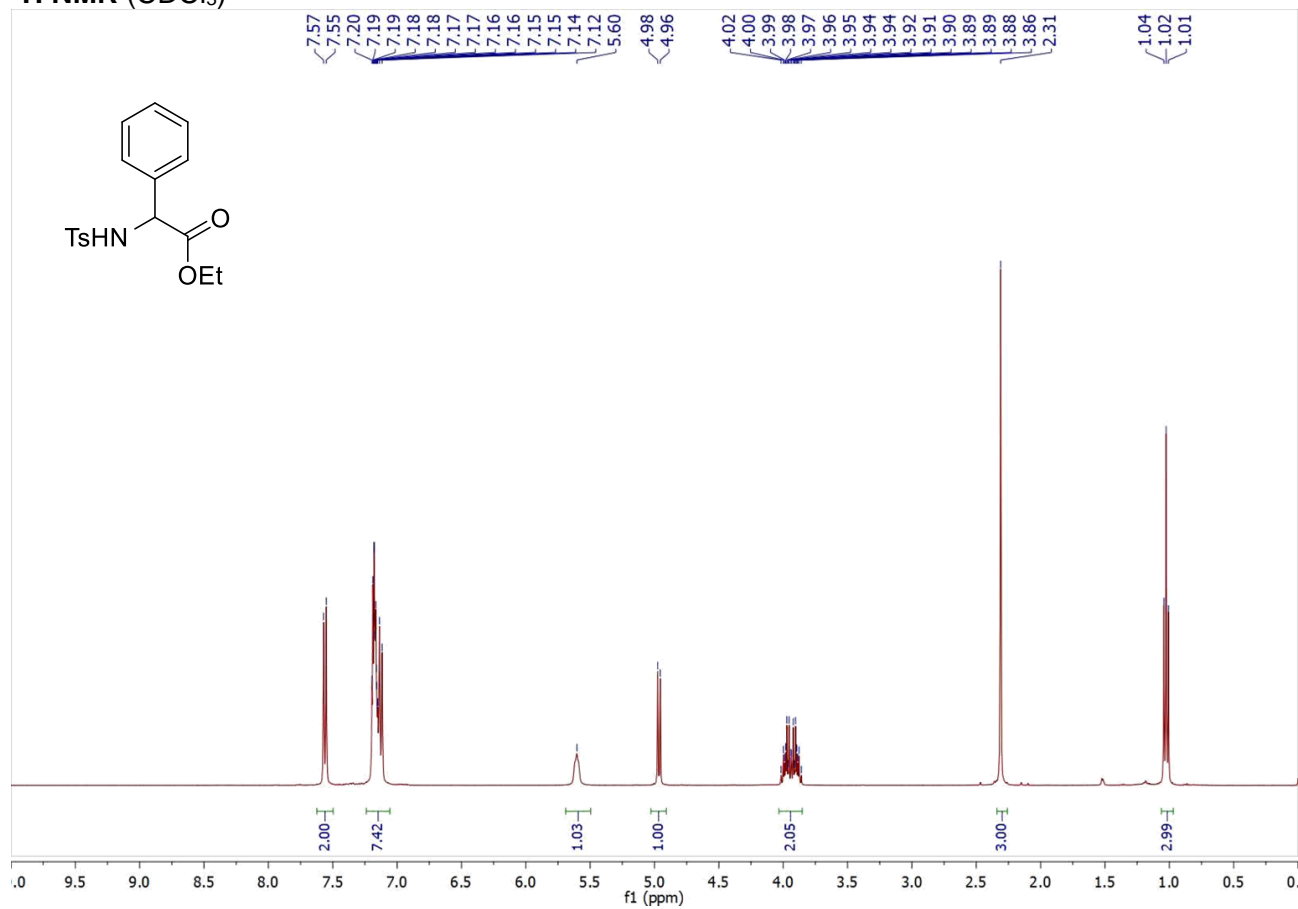

**$^{13}\text{C}\{^1\text{H}\}$  NMR ( $\text{CDCl}_3$ )**

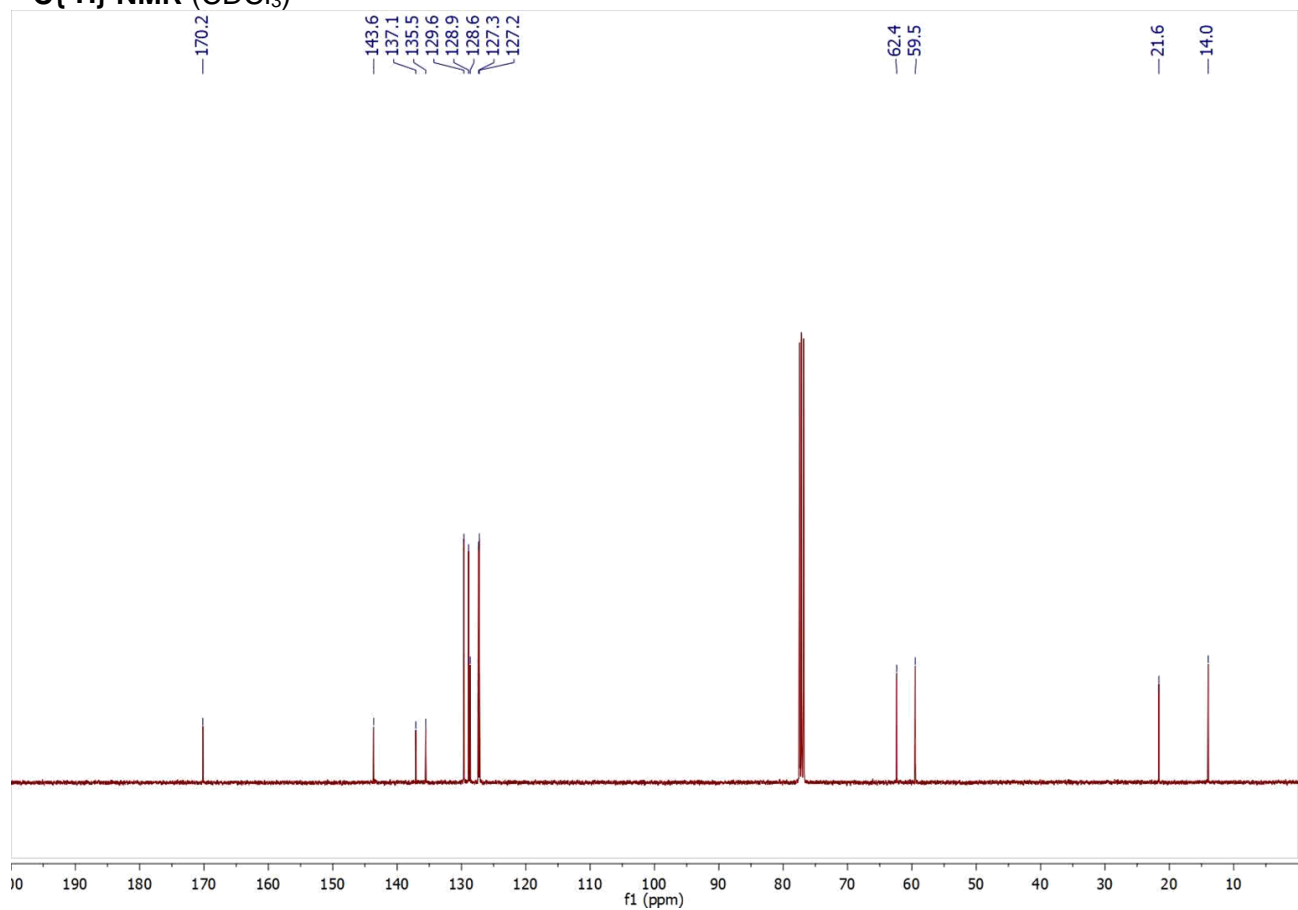

***N*-(1,2-Diphenylethyl)-4-methylbenzensulfonamide (1x)**

<sup>1</sup>H NMR (CDCl<sub>3</sub>)

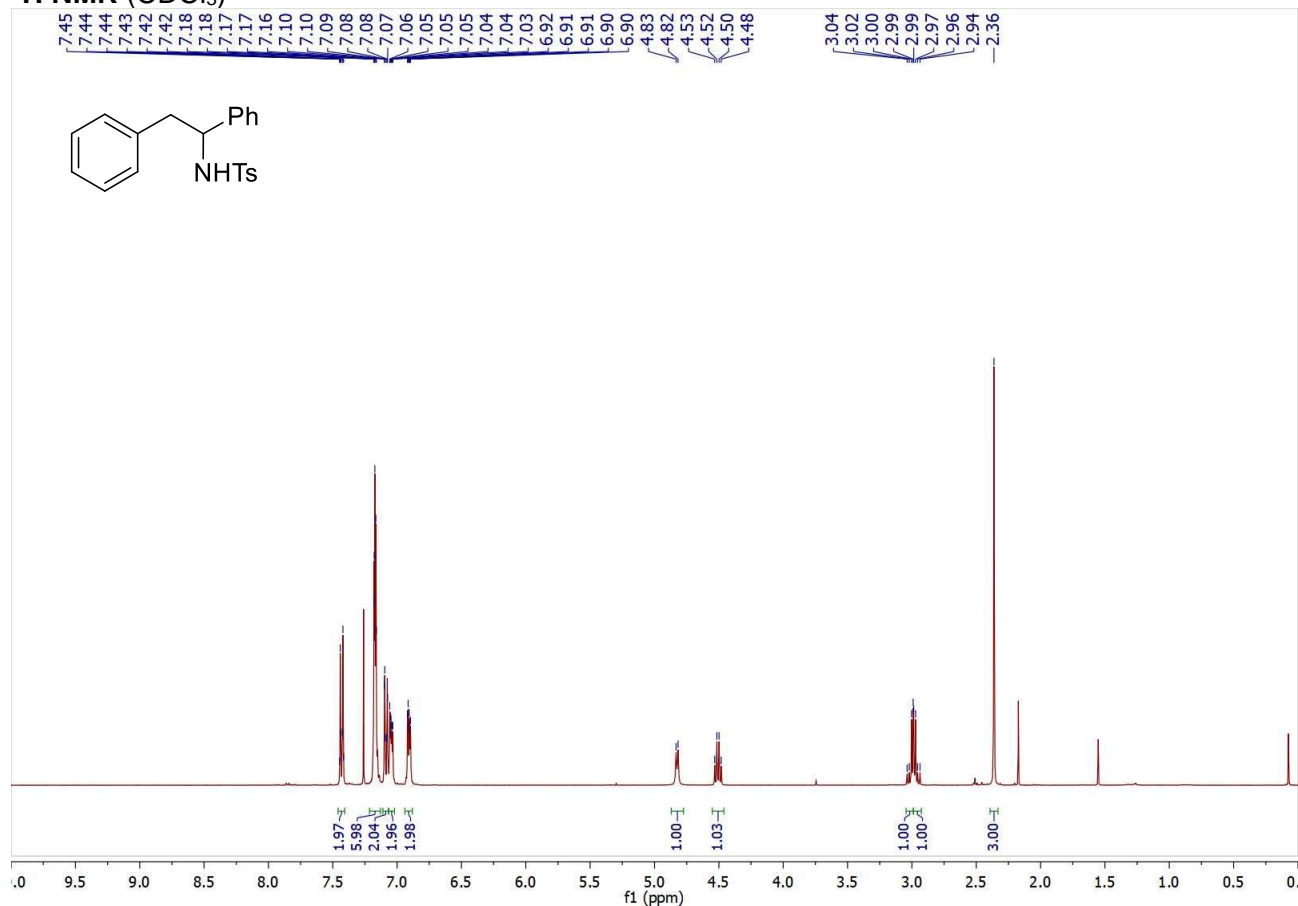

<sup>13</sup>C{<sup>1</sup>H} NMR (CDCl<sub>3</sub>)

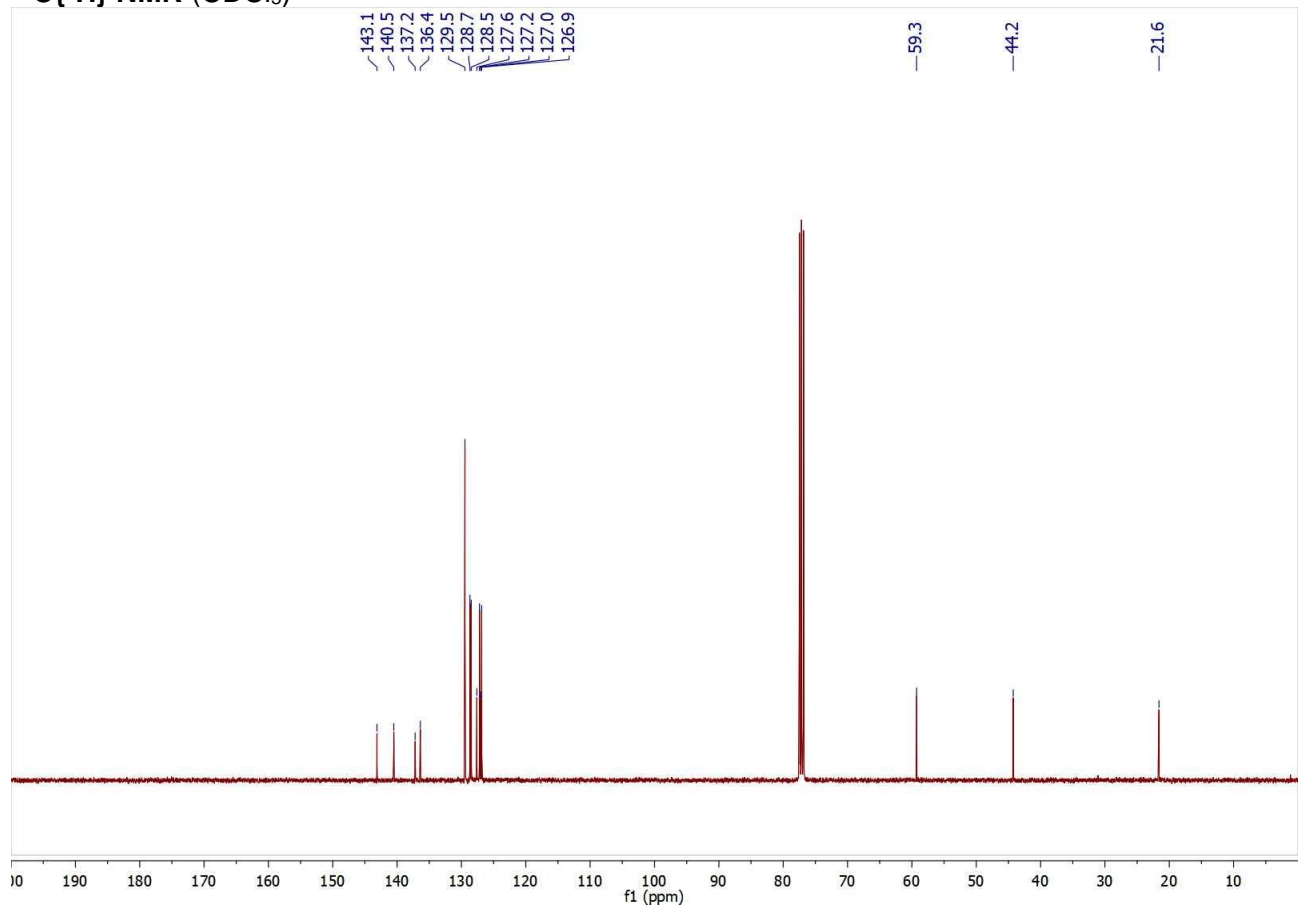

# 4-Methyl-*N*-(3-oxo-1-phenylbutan-2-yl)benzenesulfonamide (S4)

<sup>1</sup>H NMR (CDCl<sub>3</sub>)

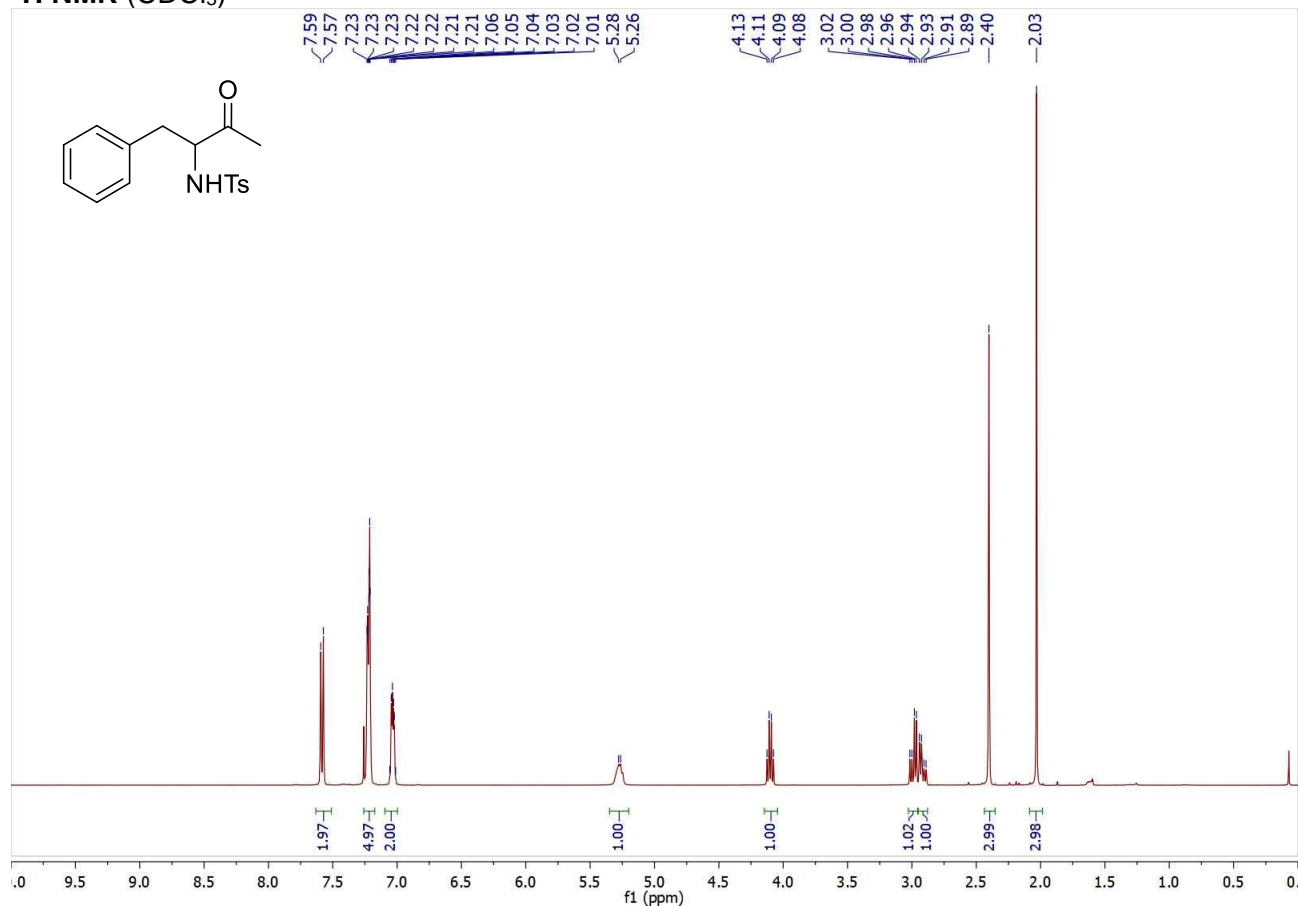

<sup>13</sup>C{<sup>1</sup>H} NMR (CDCl<sub>3</sub>)

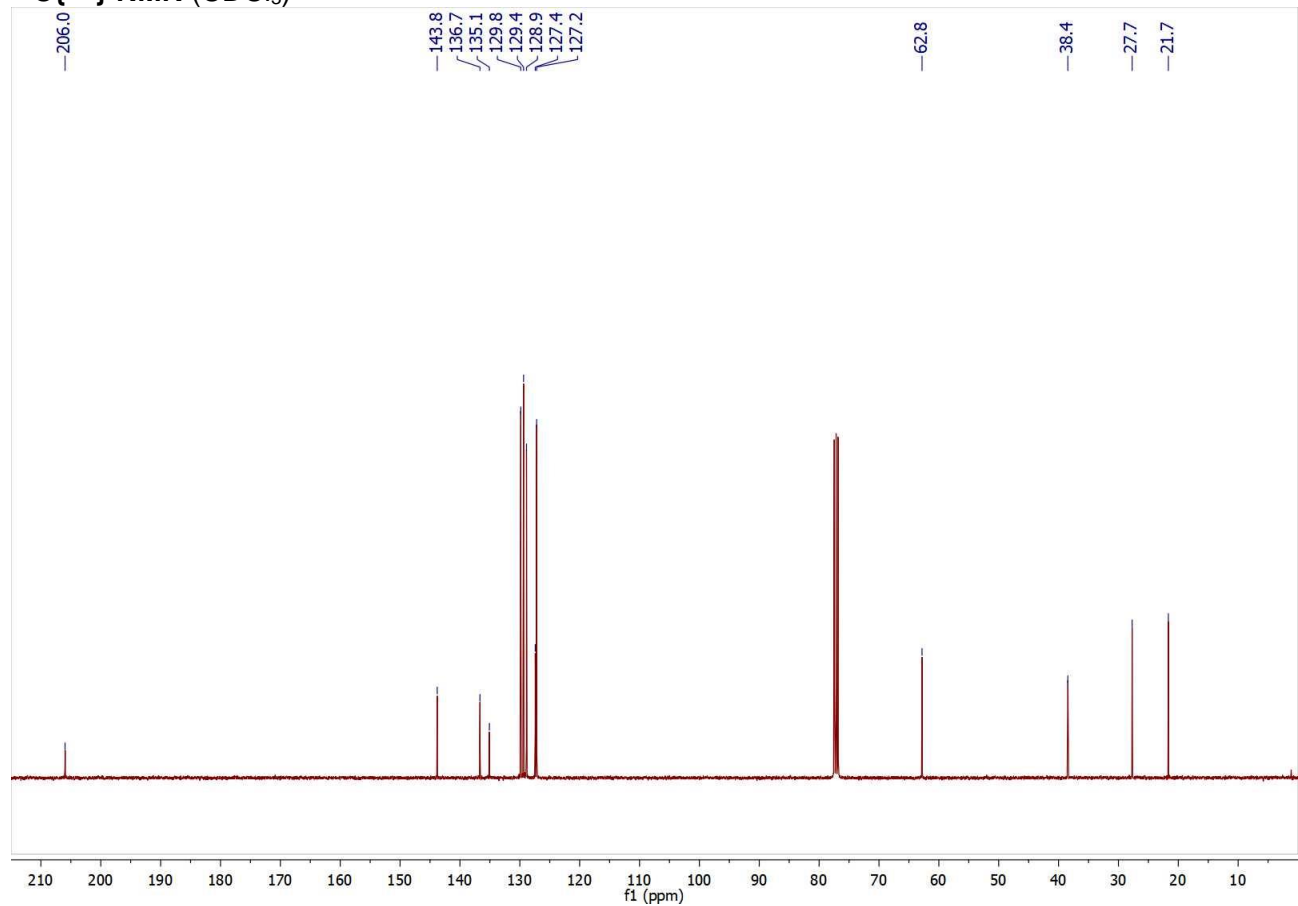

**(S)-4-Methyl-N-(1-oxo-1,3-diphenylpropan-2-yl)benzenesulfonamide (S5)**

**<sup>1</sup>H NMR (CDCl<sub>3</sub>)**

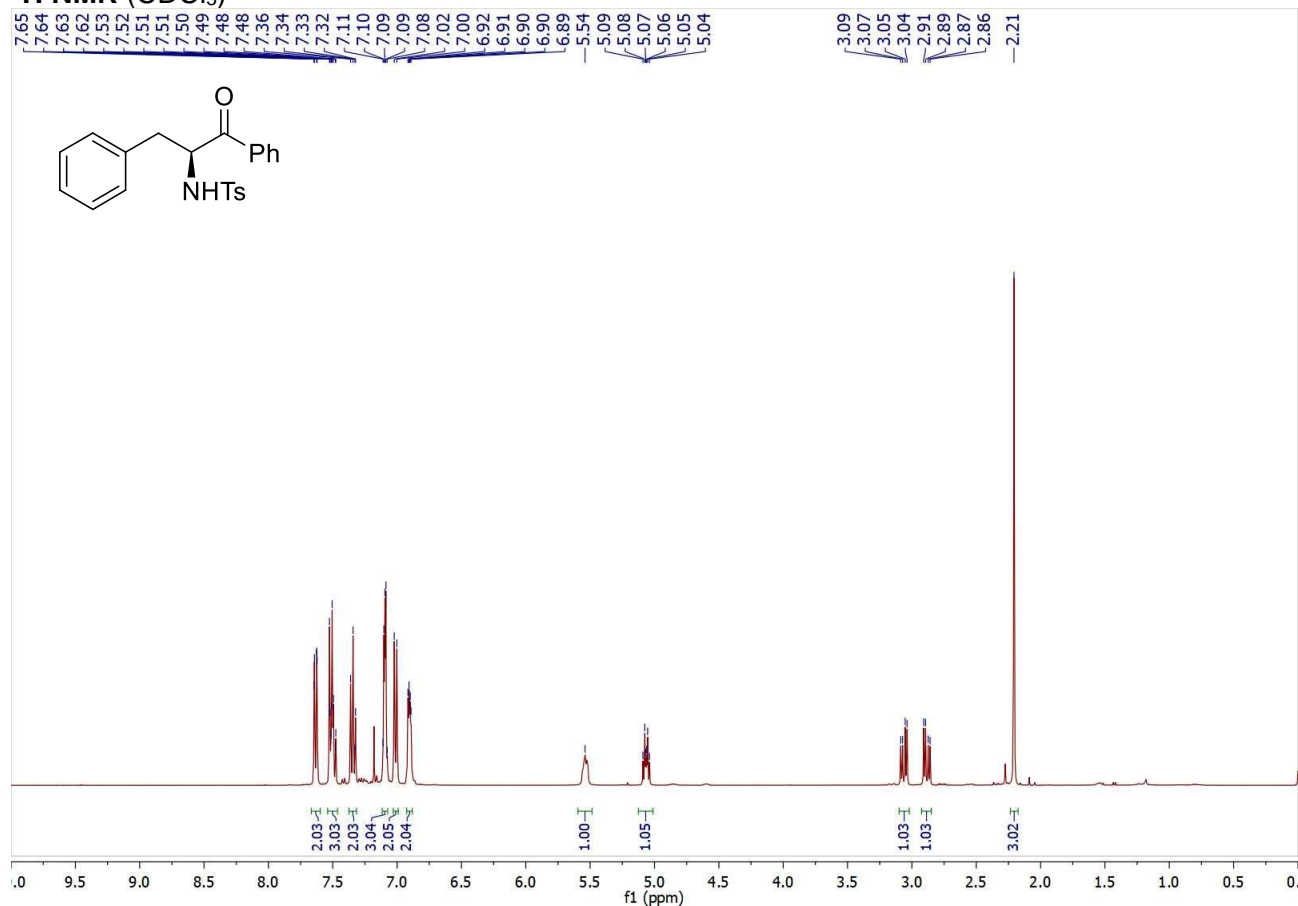

**<sup>13</sup>C{<sup>1</sup>H} NMR (CDCl<sub>3</sub>)**

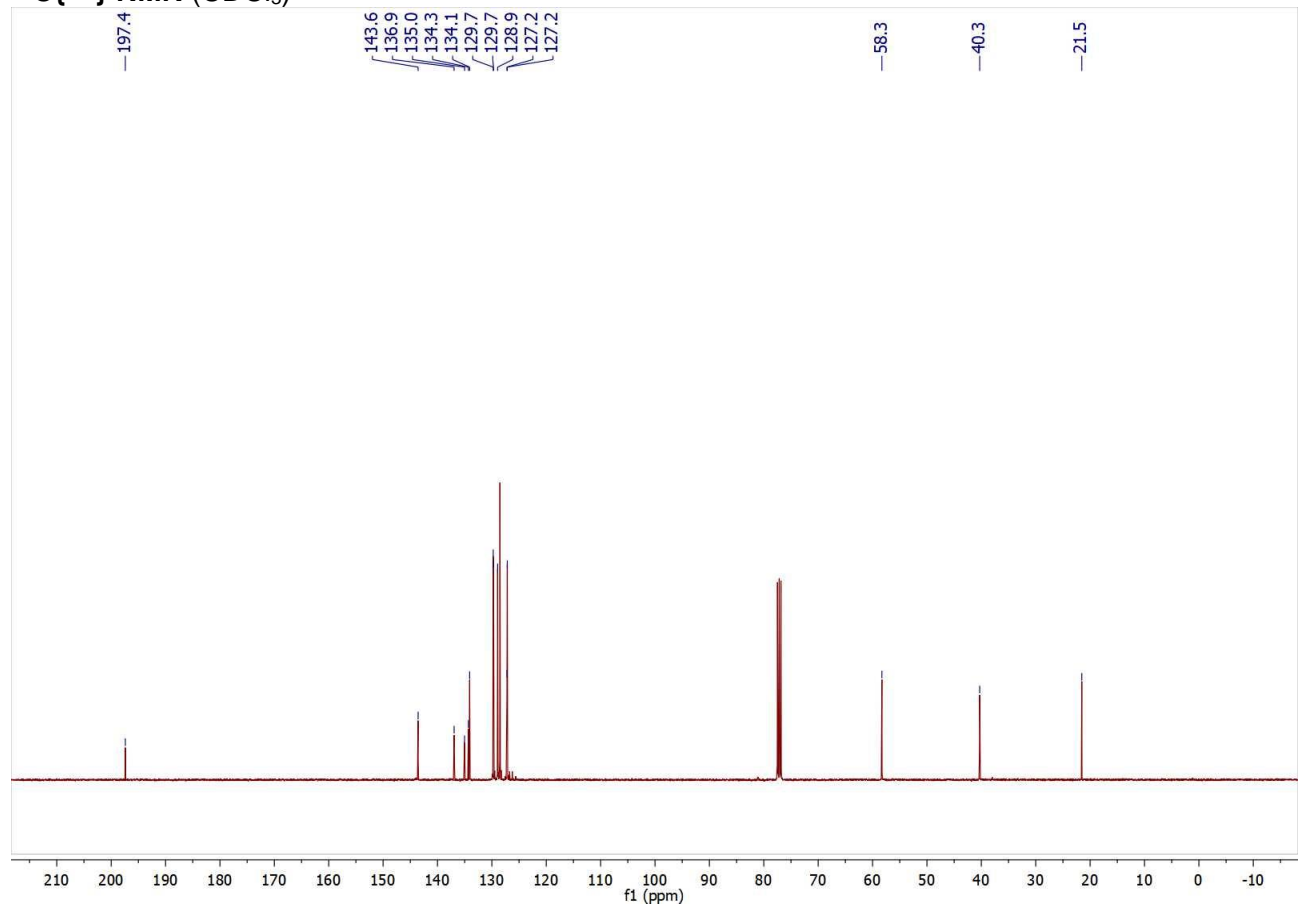

**(S)-4-Methyl-N-(1-phenyl-3-(phenylthio)propan-2-yl)benzenesulfonamide (S6)**

<sup>1</sup>H NMR (CDCl<sub>3</sub>)

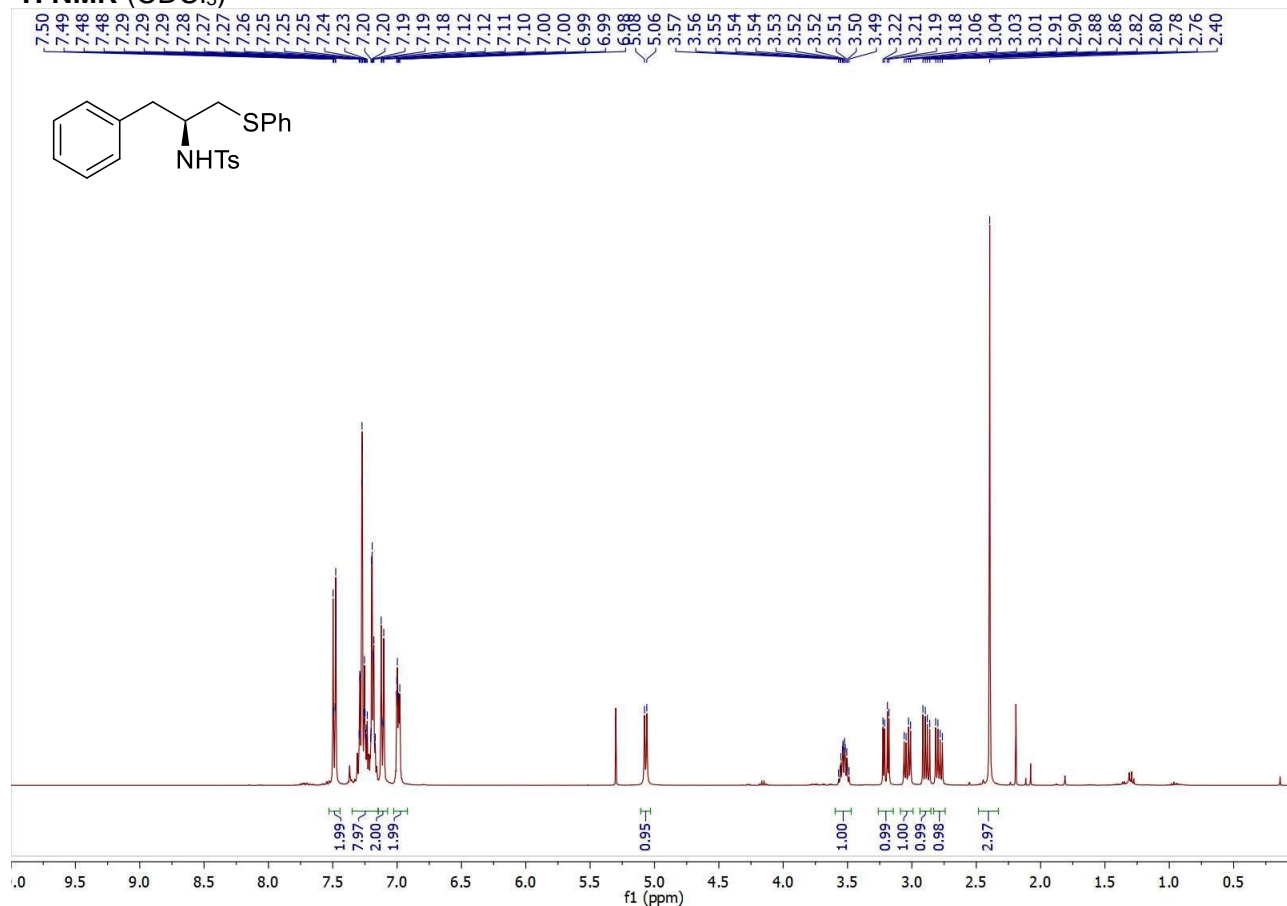

<sup>13</sup>C{<sup>1</sup>H} NMR (CDCl<sub>3</sub>)

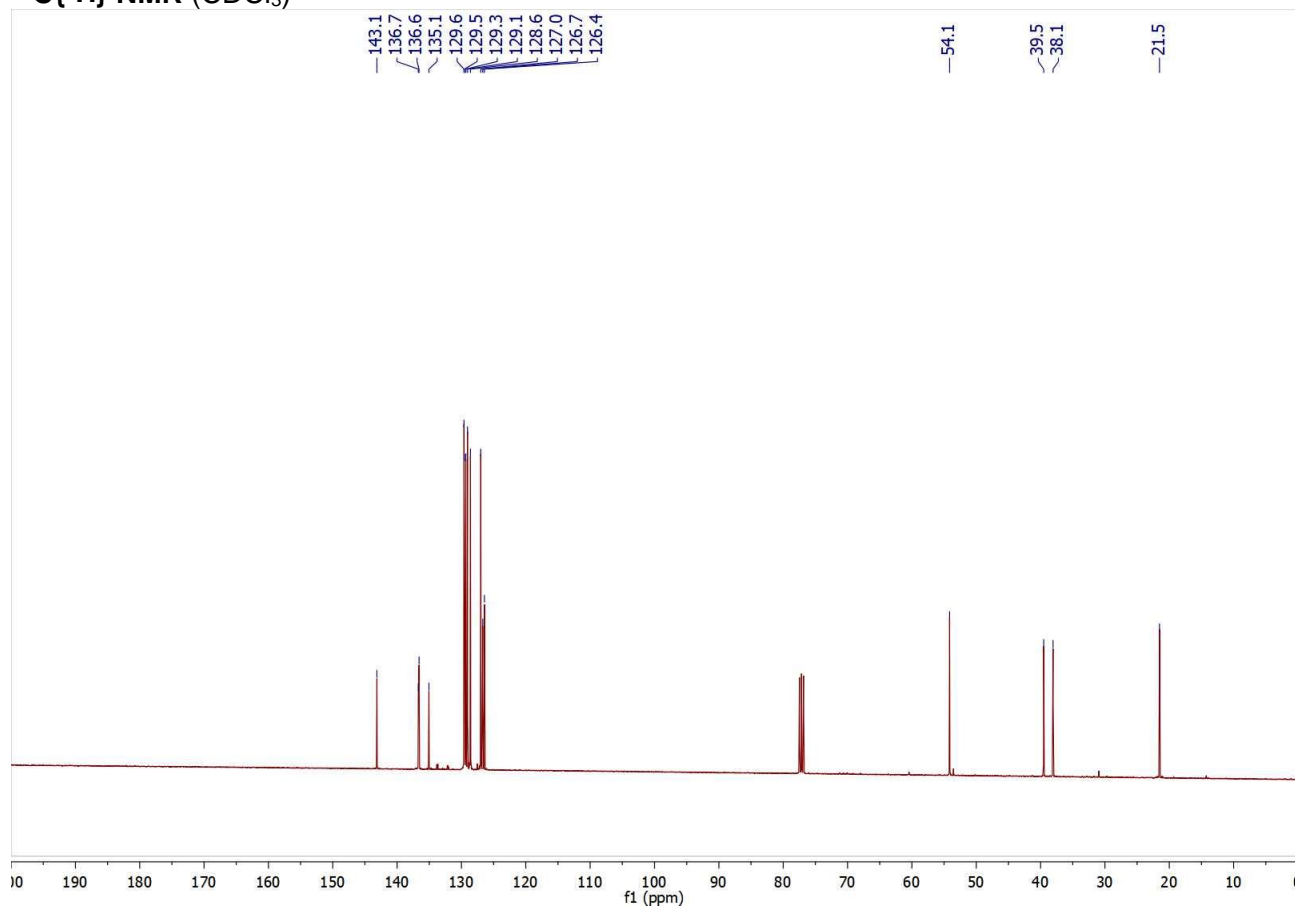

**(S)-4-Methyl-N-(1-phenyl-3-(phenylsulfonyl)propan-2-yl)benzonsulfonamide (S7)**

**<sup>1</sup>H NMR (CDCl<sub>3</sub>)**

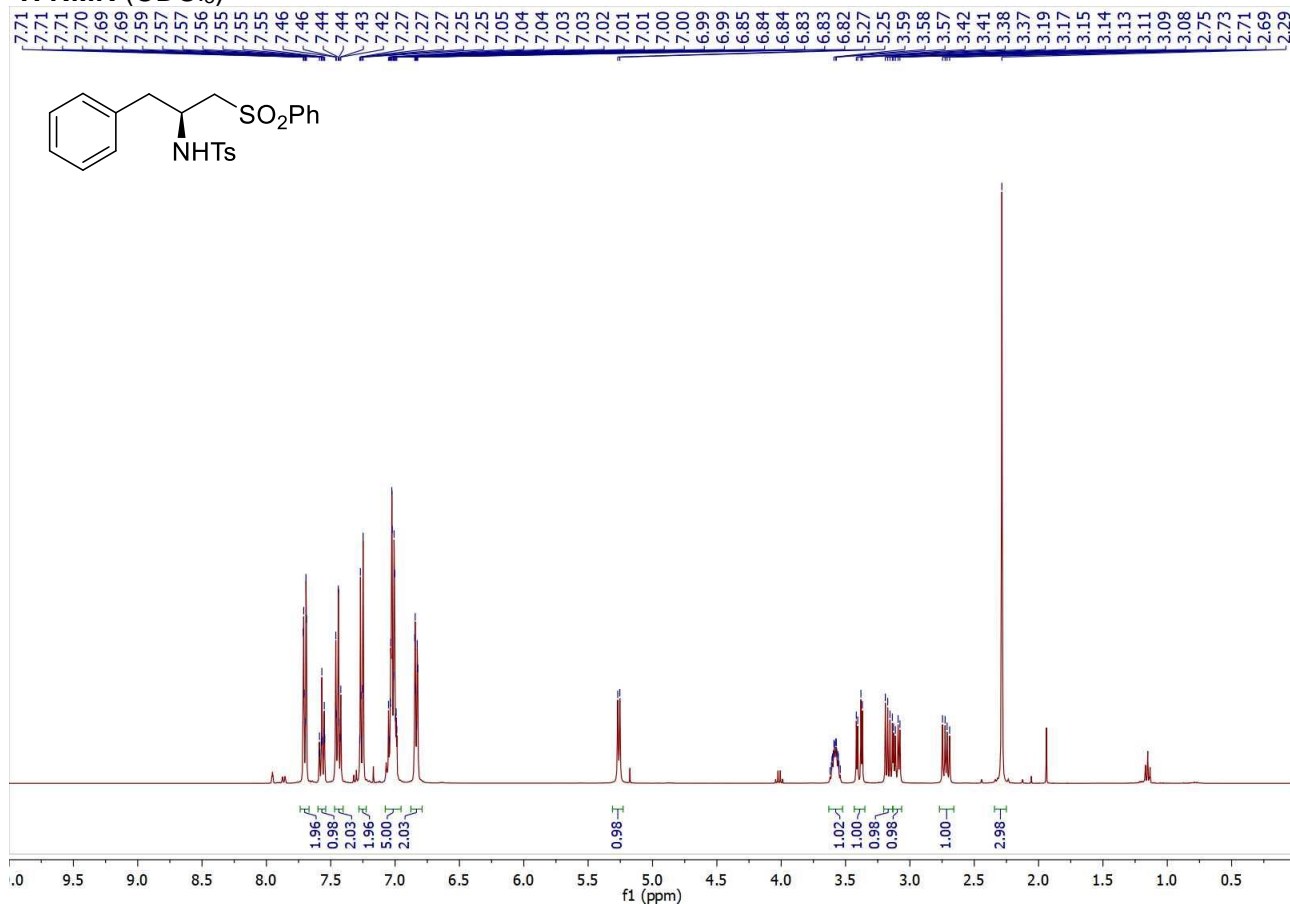

**<sup>13</sup>C{<sup>1</sup>H} NMR (CDCl<sub>3</sub>)**

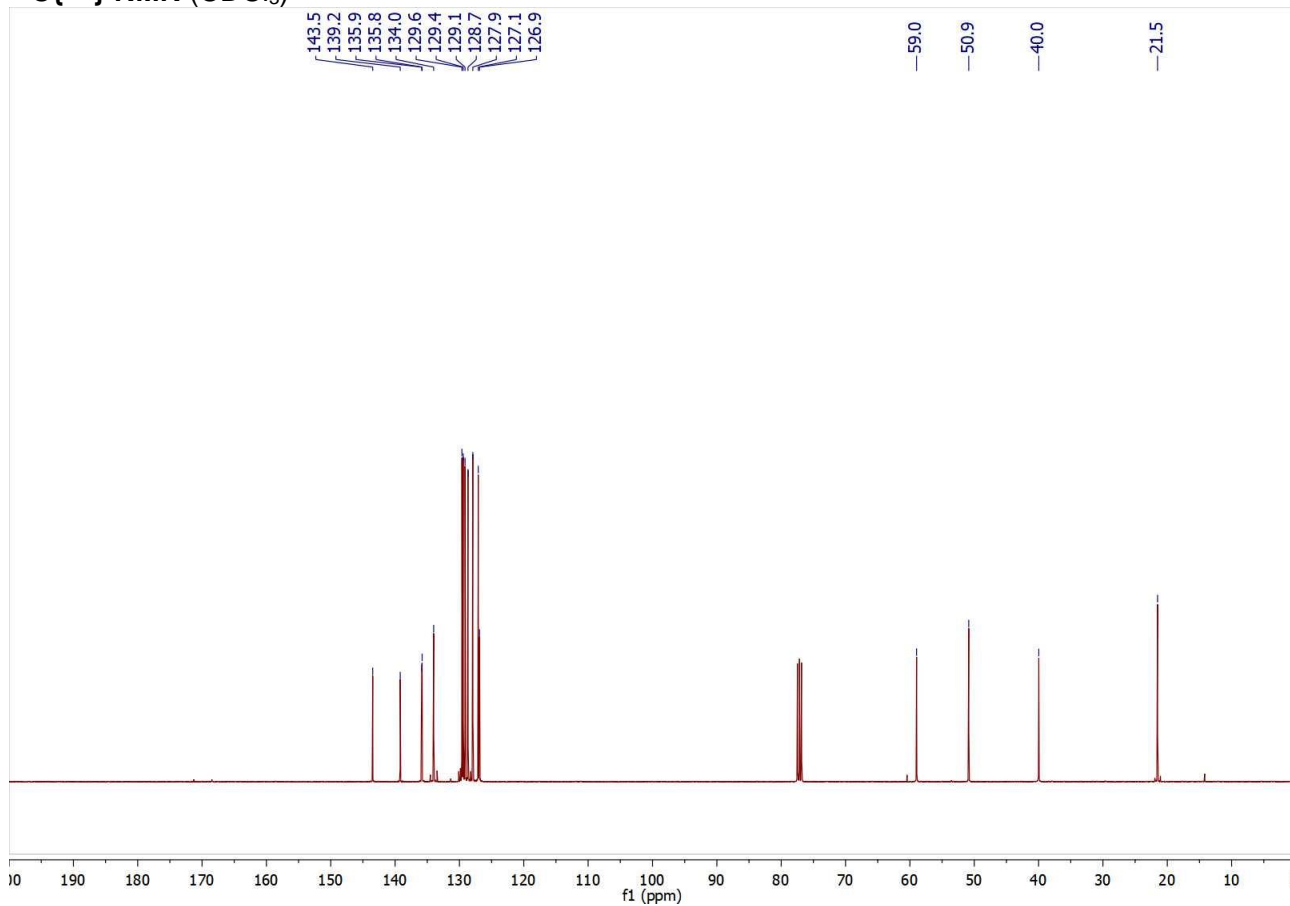

**4-Methyl-N-(1-(2-methyl-1,3-dioxolan-2-yl)-2-phenylethyl)benzenesulfonamide (S8)**

**<sup>1</sup>H NMR (CDCl<sub>3</sub>)**

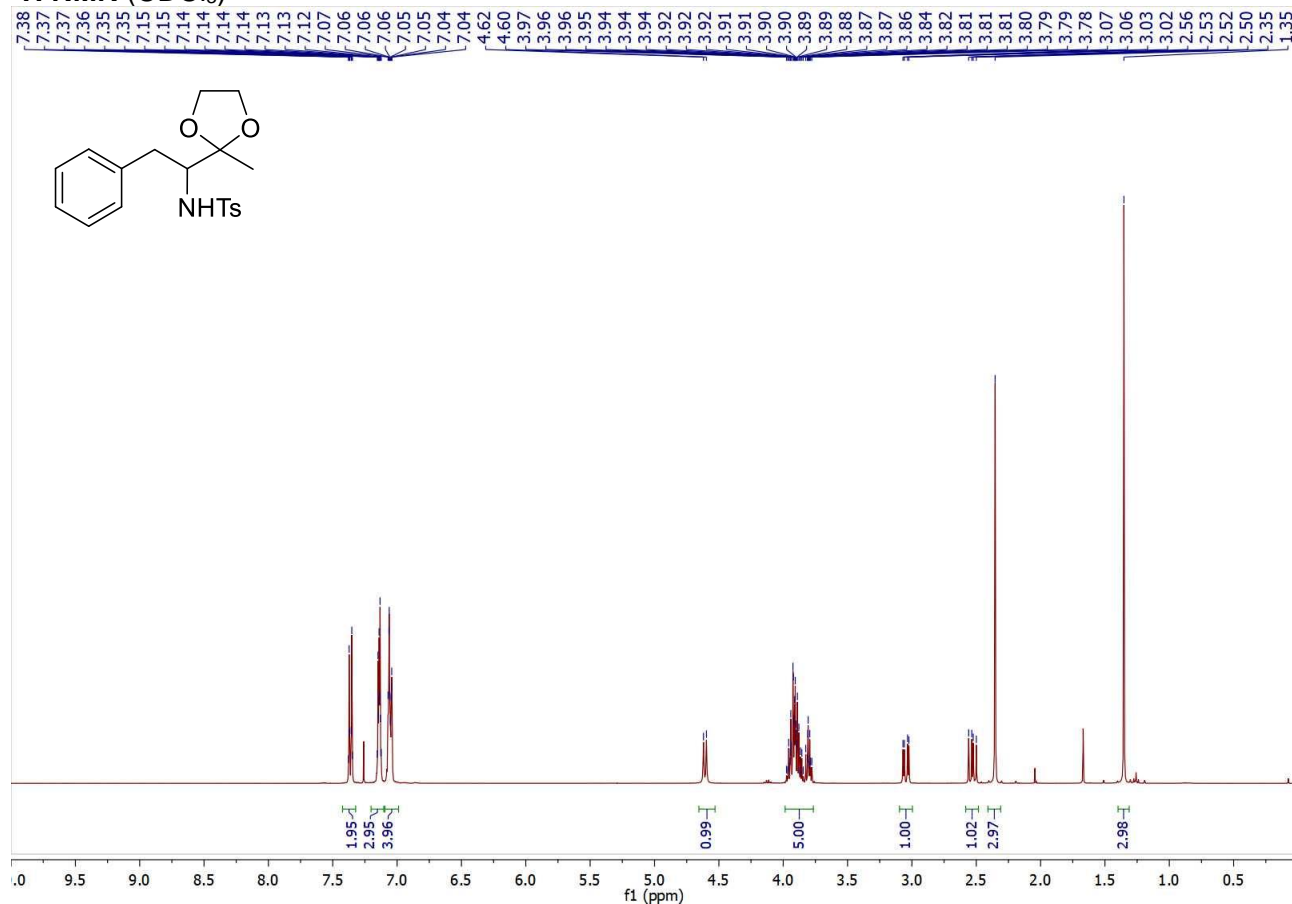

**<sup>13</sup>C{<sup>1</sup>H} NMR (CDCl<sub>3</sub>)**

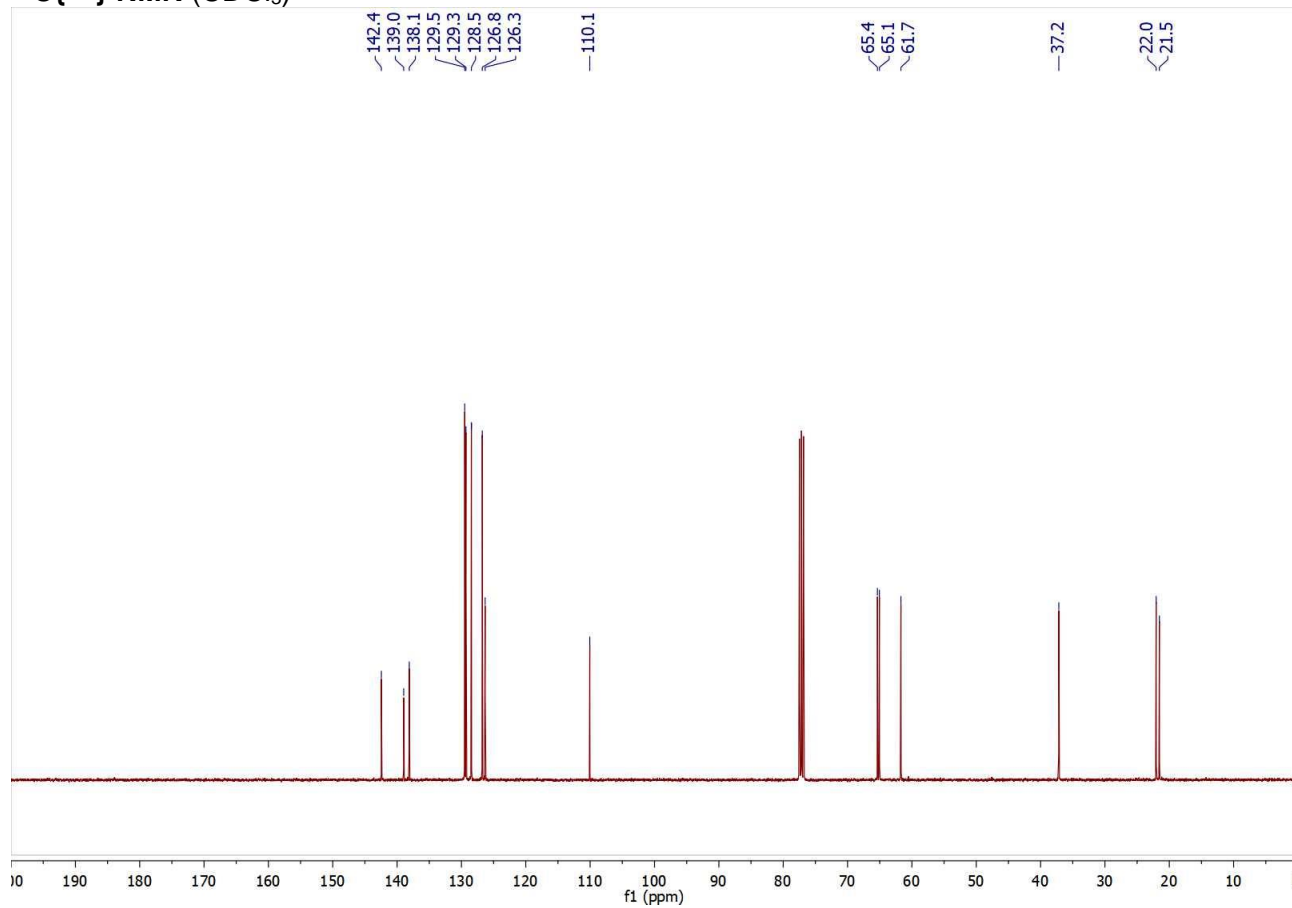

# **Ethyl 2-bromo-2(phenylsulfonamido)acetate (S9)**

**<sup>1</sup>H NMR (CDCl<sub>3</sub>)**

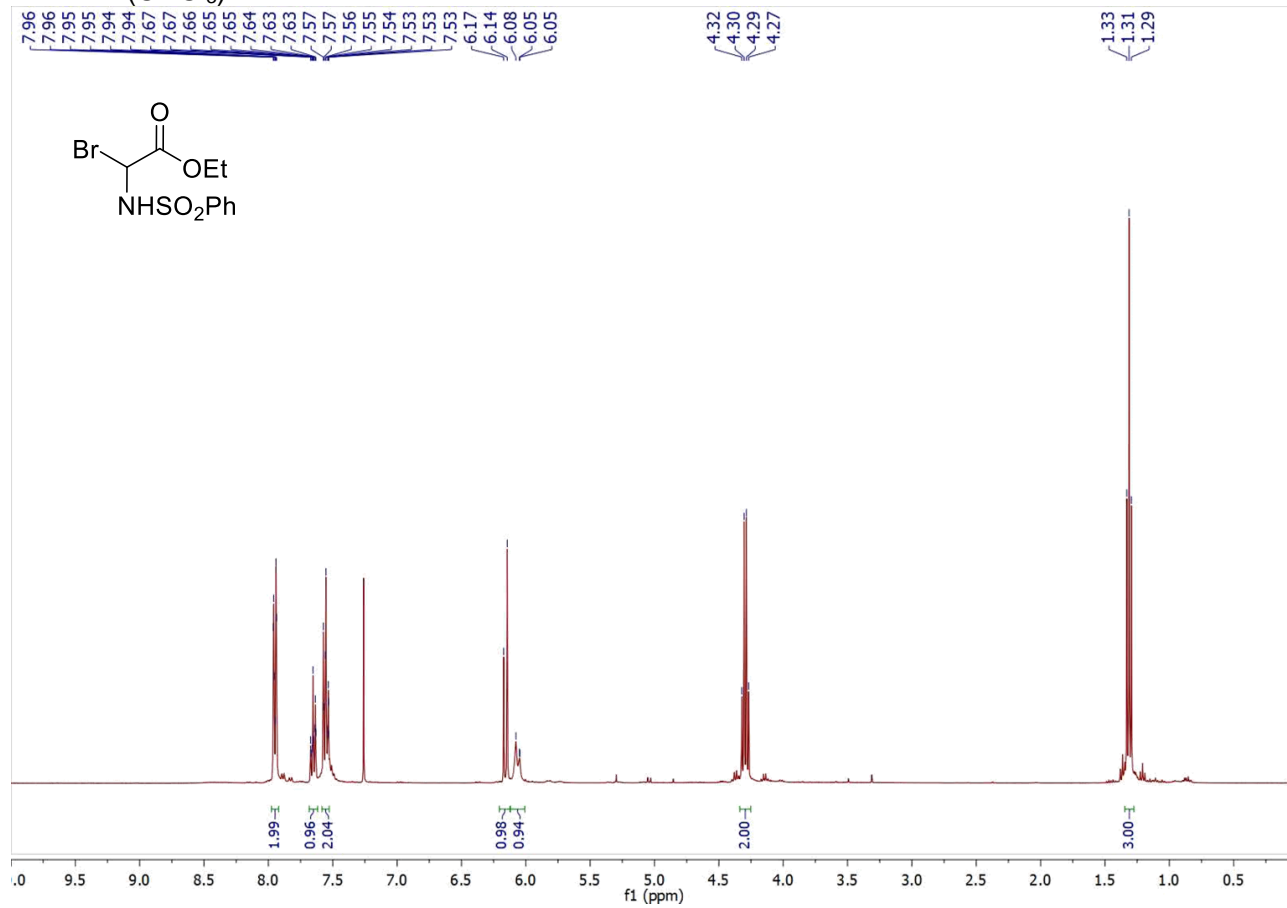

**<sup>13</sup>C{<sup>1</sup>H} NMR (CDCl<sub>3</sub>)**

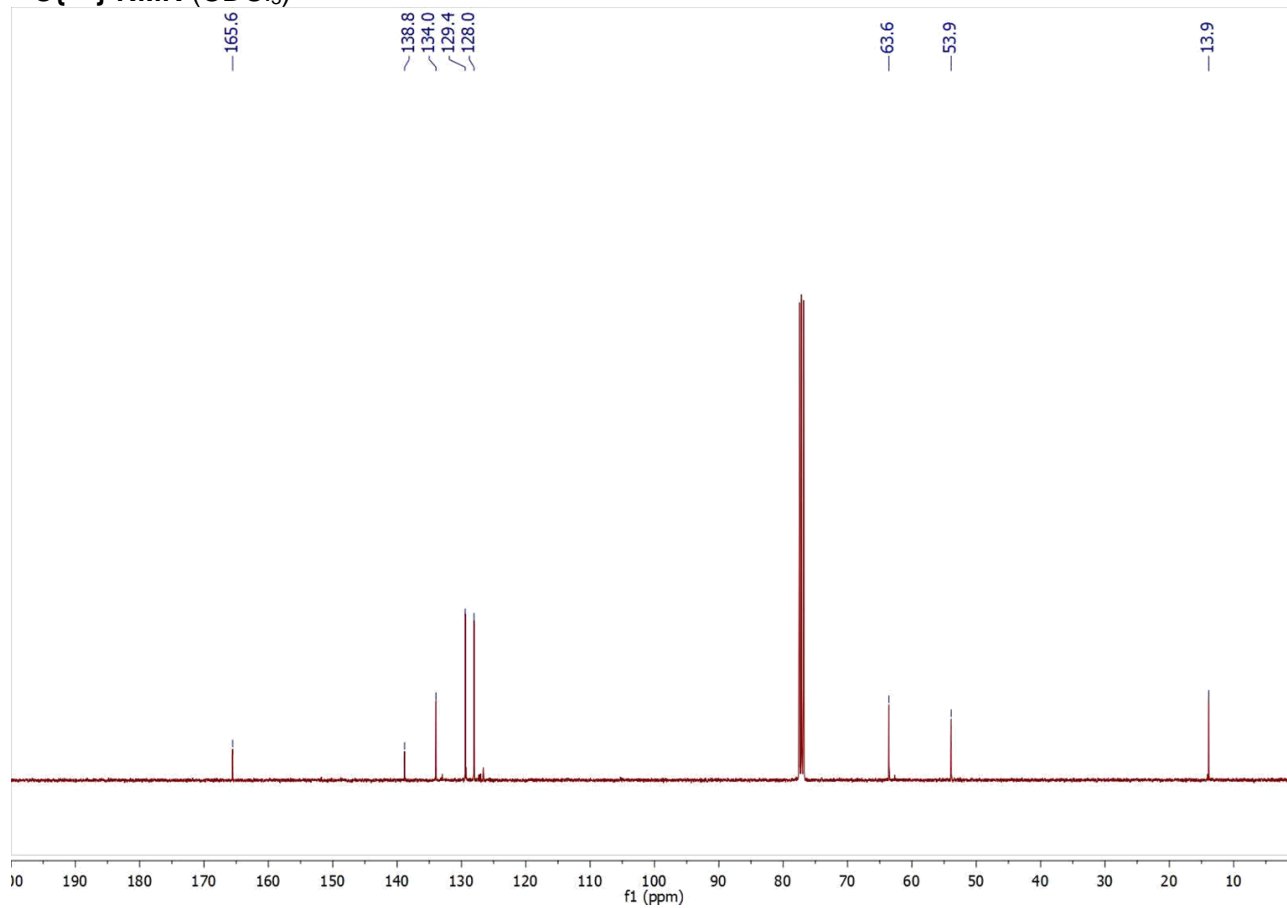



# 5-Bromo-2-iodoisoindoline-1,3-dione (S1ab)

$^1\text{H}$  NMR ( $\text{CD}_3\text{COCD}_3$ )

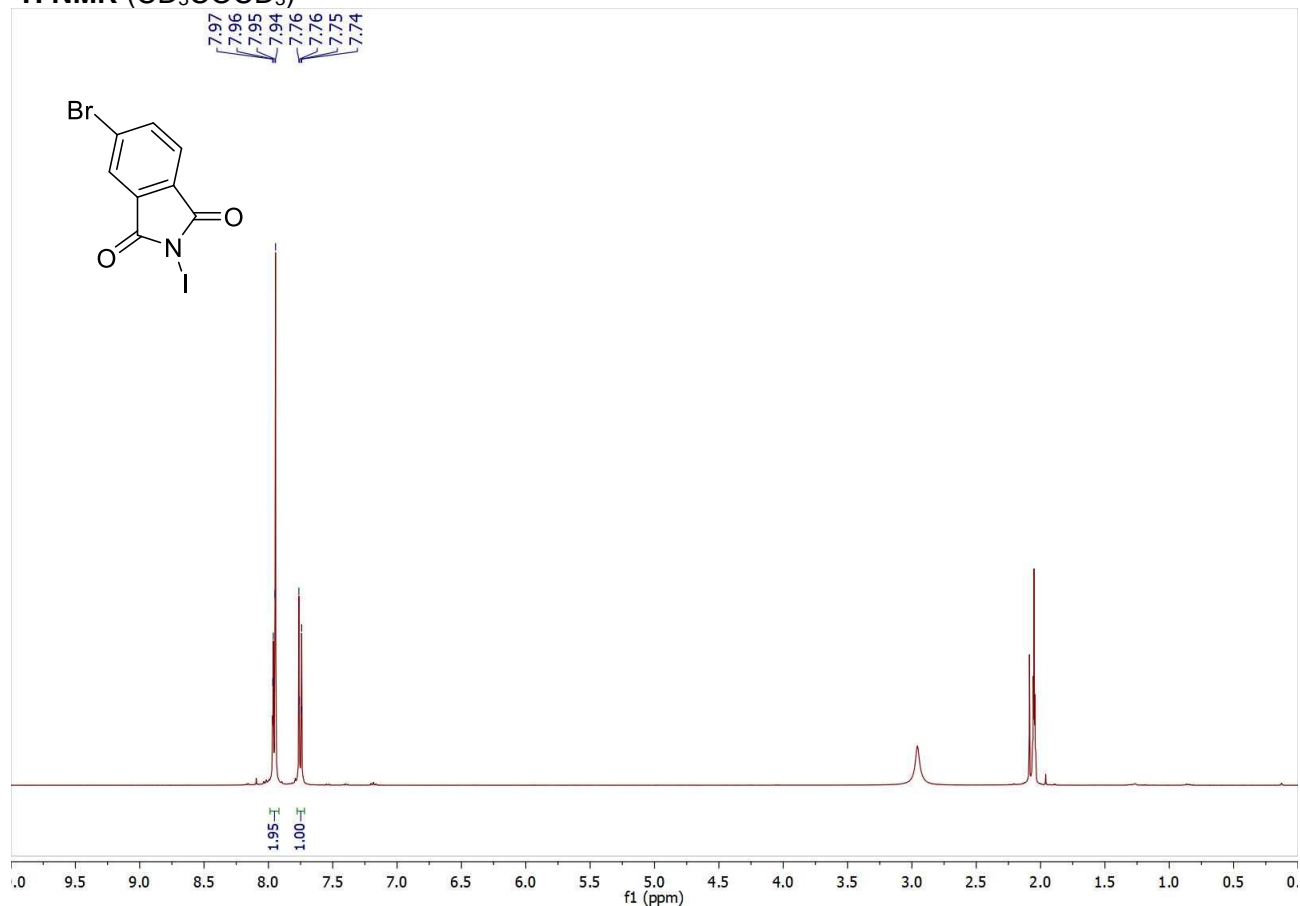

$^{13}\text{C}\{^1\text{H}\}$  NMR ( $\text{CD}_3\text{COCD}_3$ )

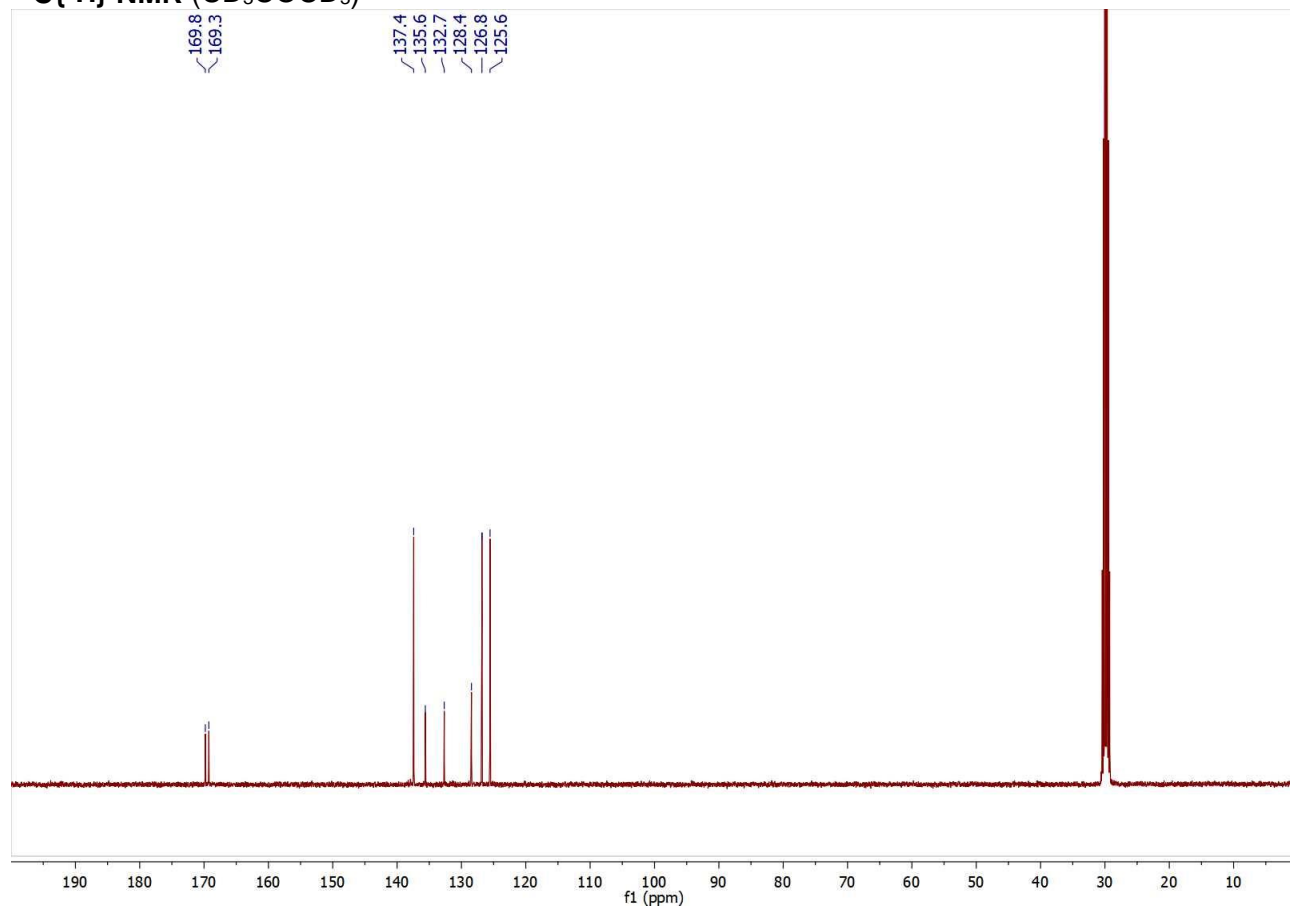

### 3-Ethyl-1-iodo-3-methylpyrrolidine-2,5-dione (*N*-iodoethosuxumide) (S1ac)

$^1\text{H}$  NMR ( $\text{CDCl}_3$ )

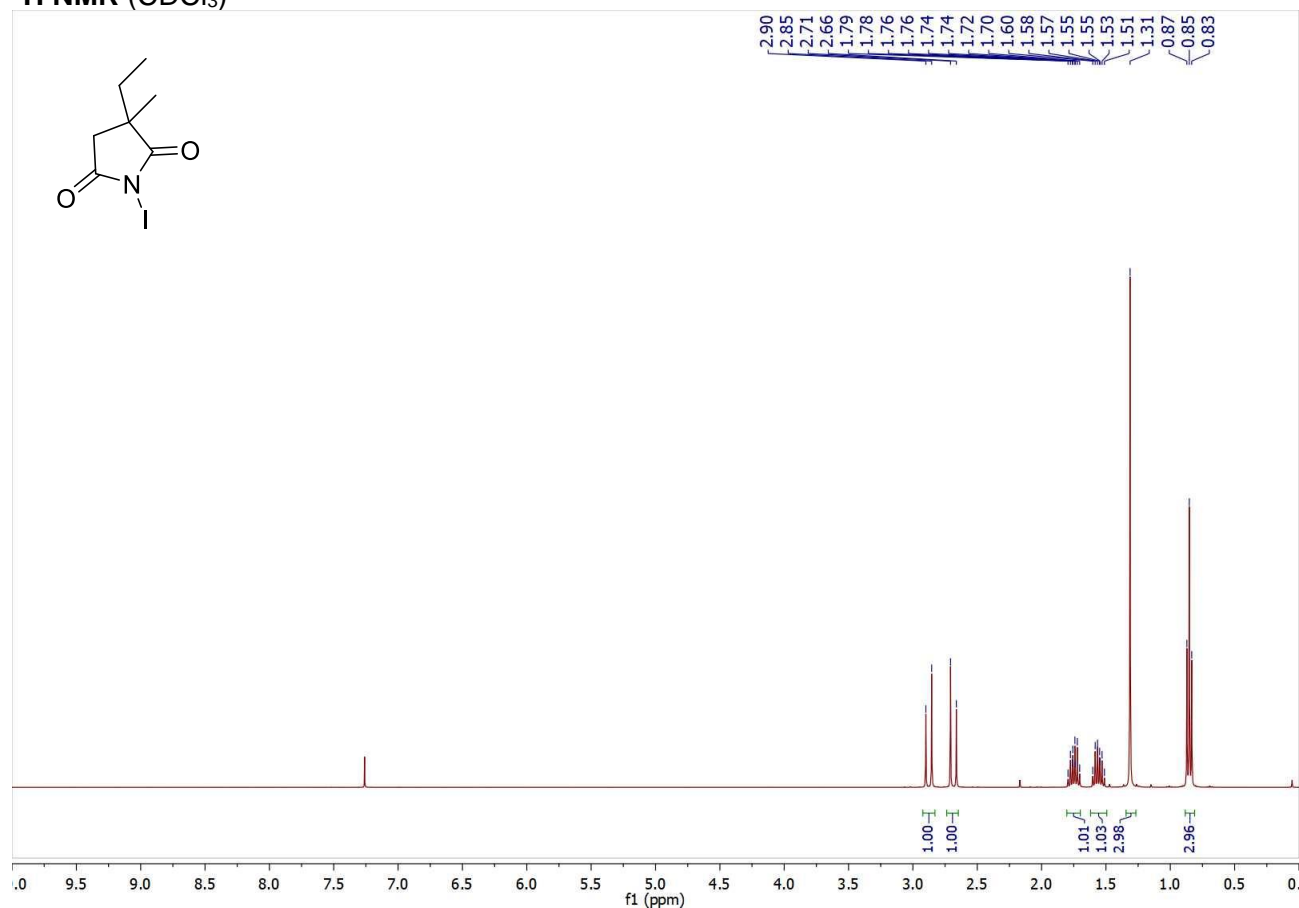

$^{13}\text{C}\{^1\text{H}\}$  NMR ( $\text{CDCl}_3$ )

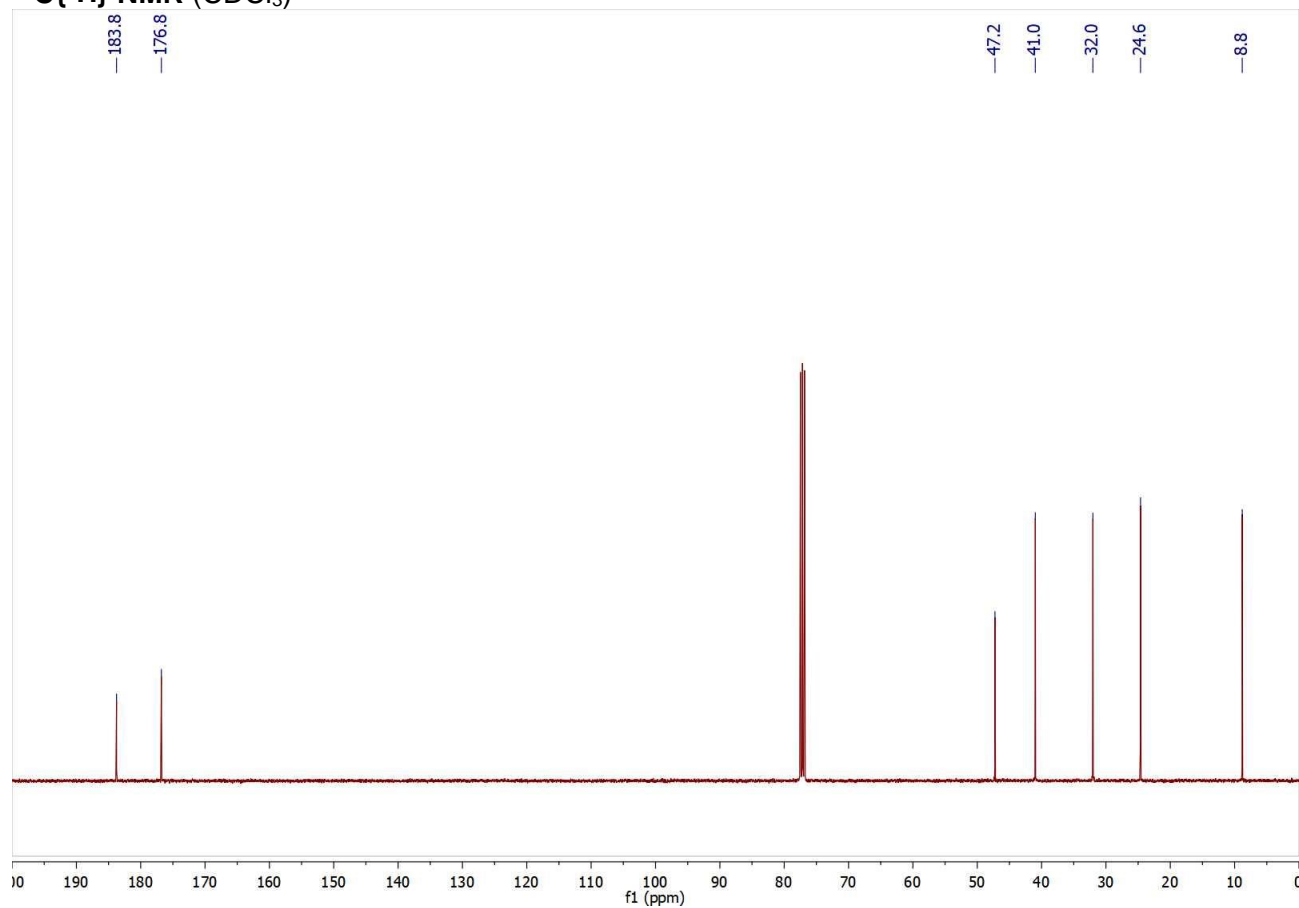

**3-Iodo-5,5-dimethyloxazolidine-2,4-dione (S1ad)**

$^1\text{H}$  NMR ( $\text{CD}_3\text{COCD}_3$ )

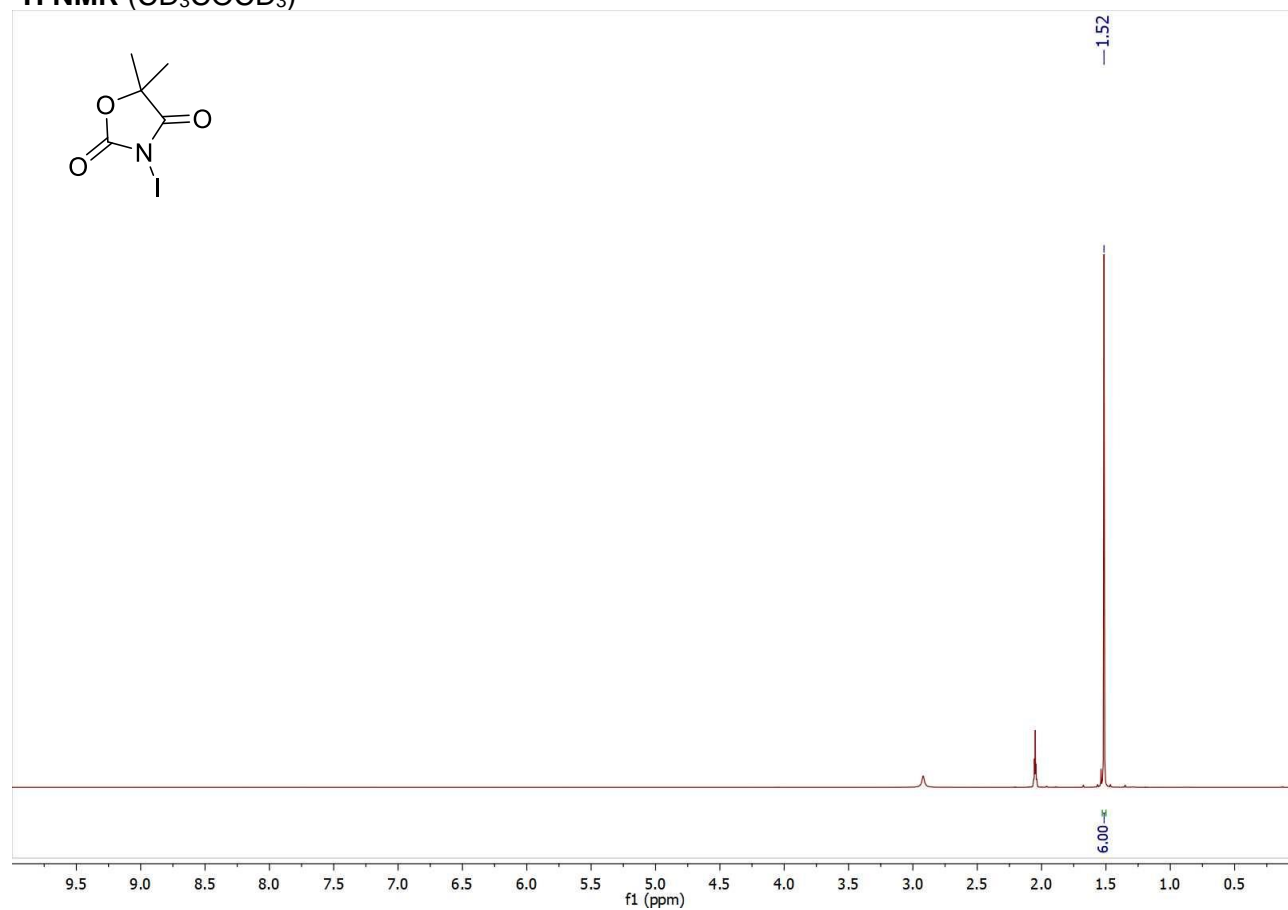

$^{13}\text{C}\{^1\text{H}\}$  NMR ( $\text{CD}_3\text{COCD}_3$ )

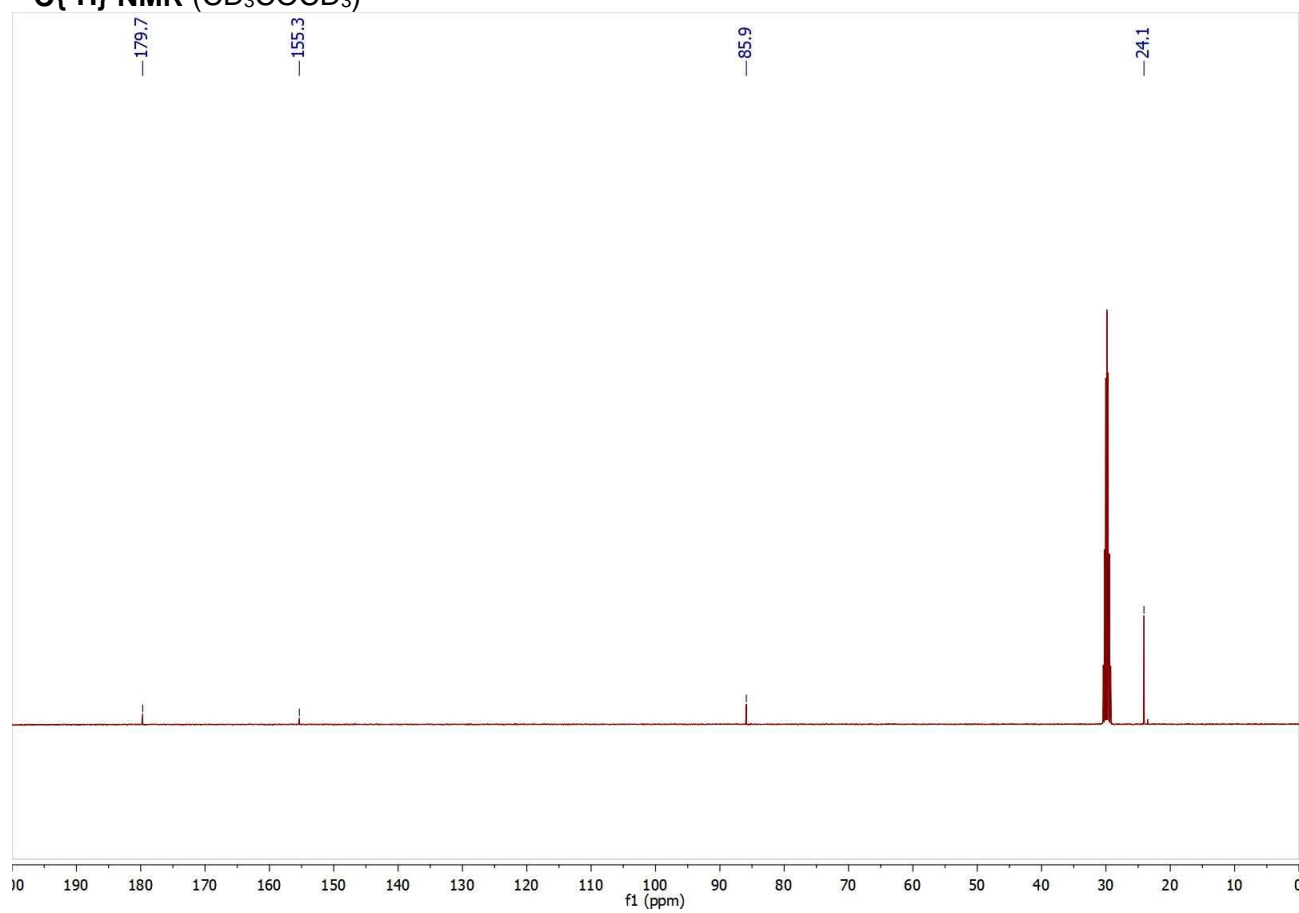

### 3-Iodo-5,5-diphenylimidazolidine-2,4-dione (S1af)

$^1\text{H}$  NMR ( $\text{CD}_3\text{COCD}_3$ )

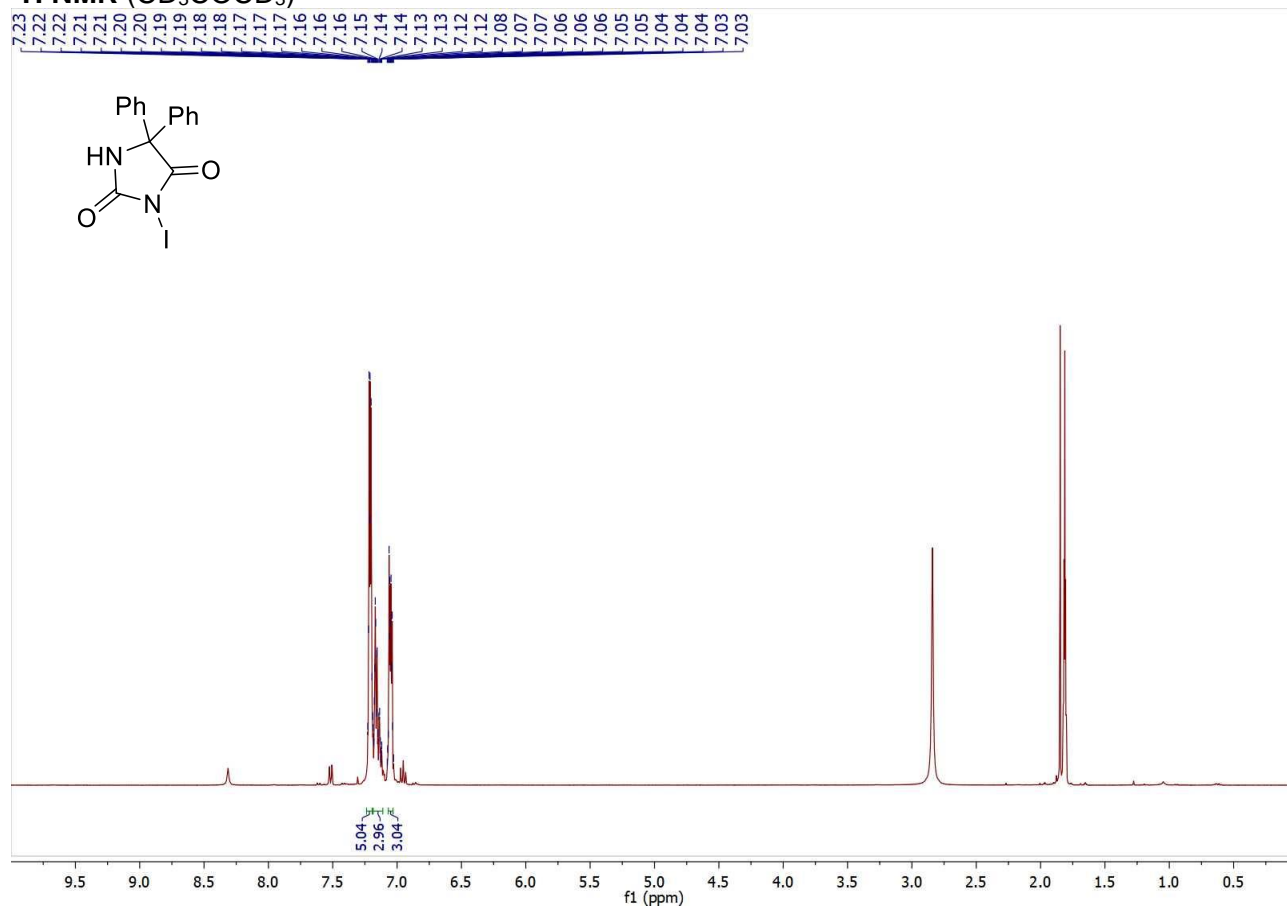

$^{13}\text{C}\{^1\text{H}\}$  NMR ( $\text{CD}_3\text{COCD}_3$ )

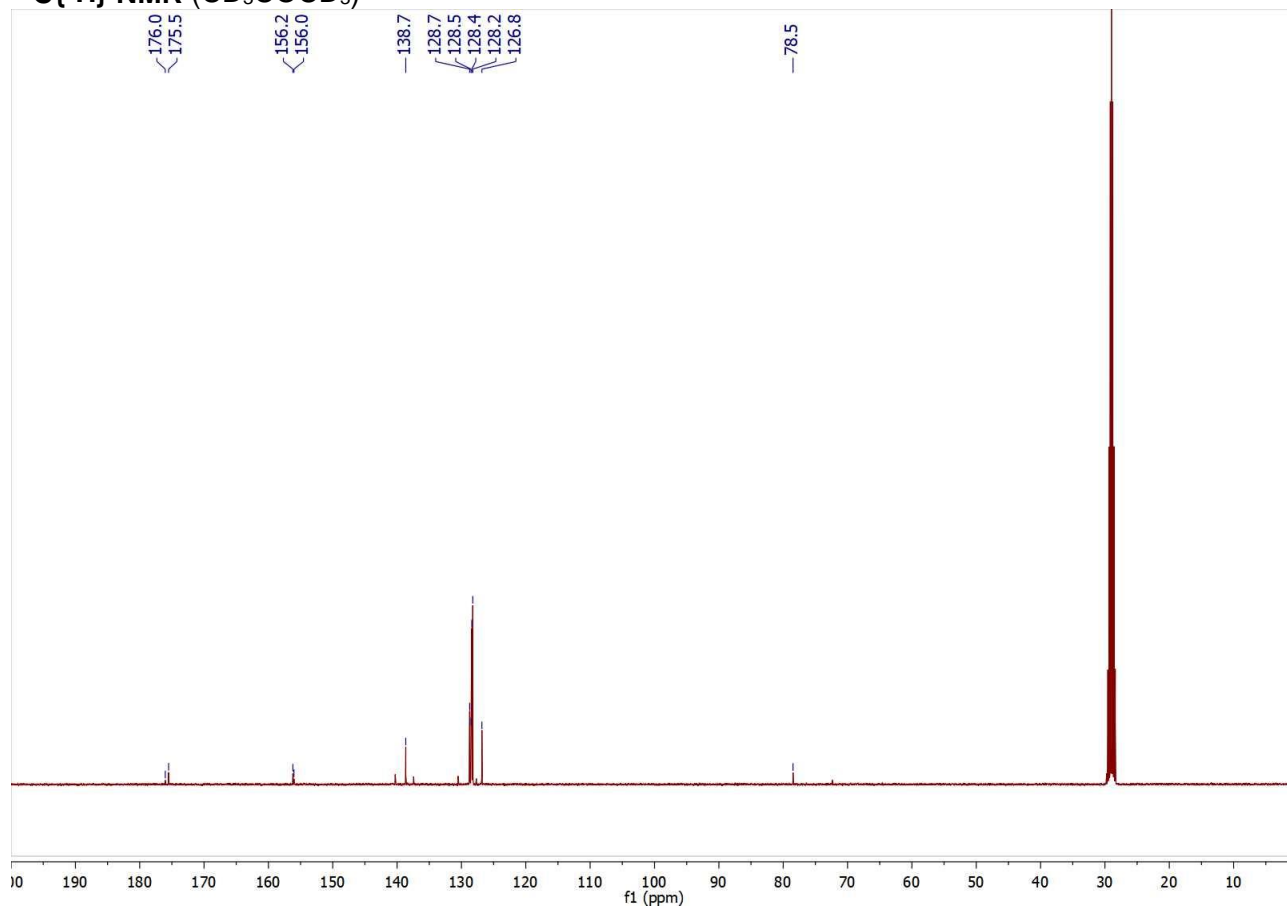

# **N-iodothalidomide (S1ag)**

**<sup>1</sup>H NMR (CD<sub>3</sub>COCD<sub>3</sub>)**

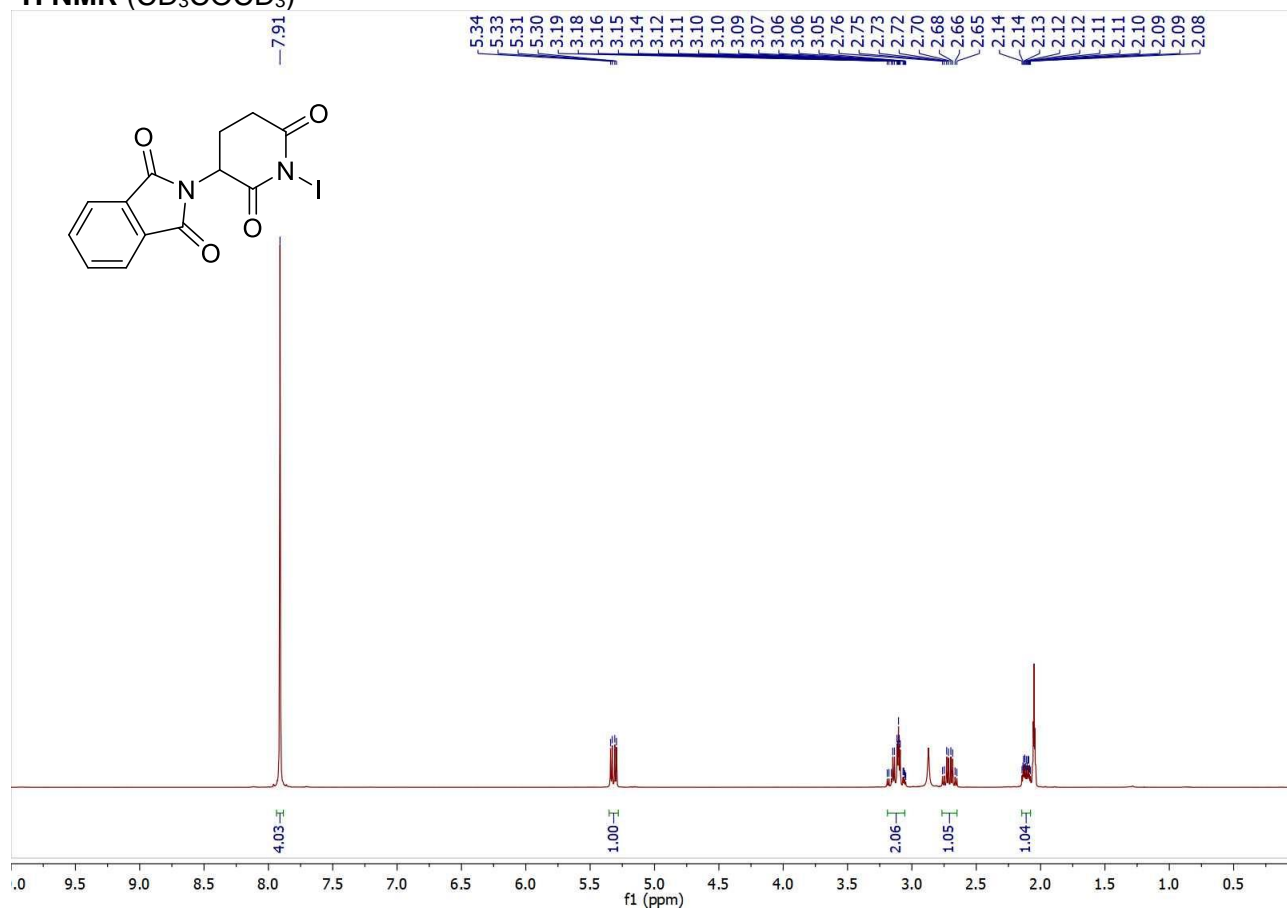

**<sup>13</sup>C{<sup>1</sup>H} NMR (CD<sub>3</sub>COCD<sub>3</sub>)**

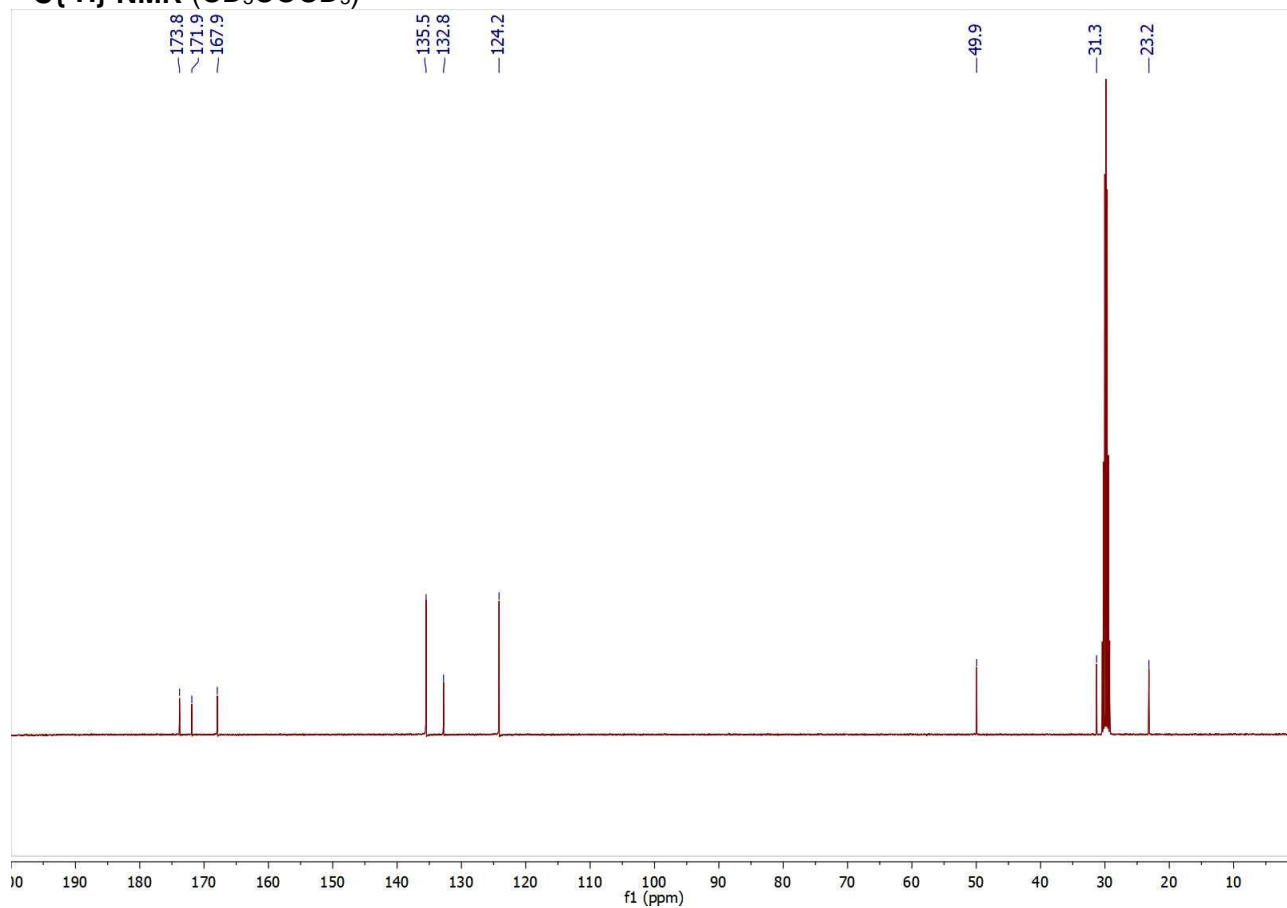

**Ethyl 2-(2,5-dioxopyrrolidin-1-yl)-2-(4-metilfenilsulfonamide)acetate (2a)**

<sup>1</sup>H NMR (CDCl<sub>3</sub>)

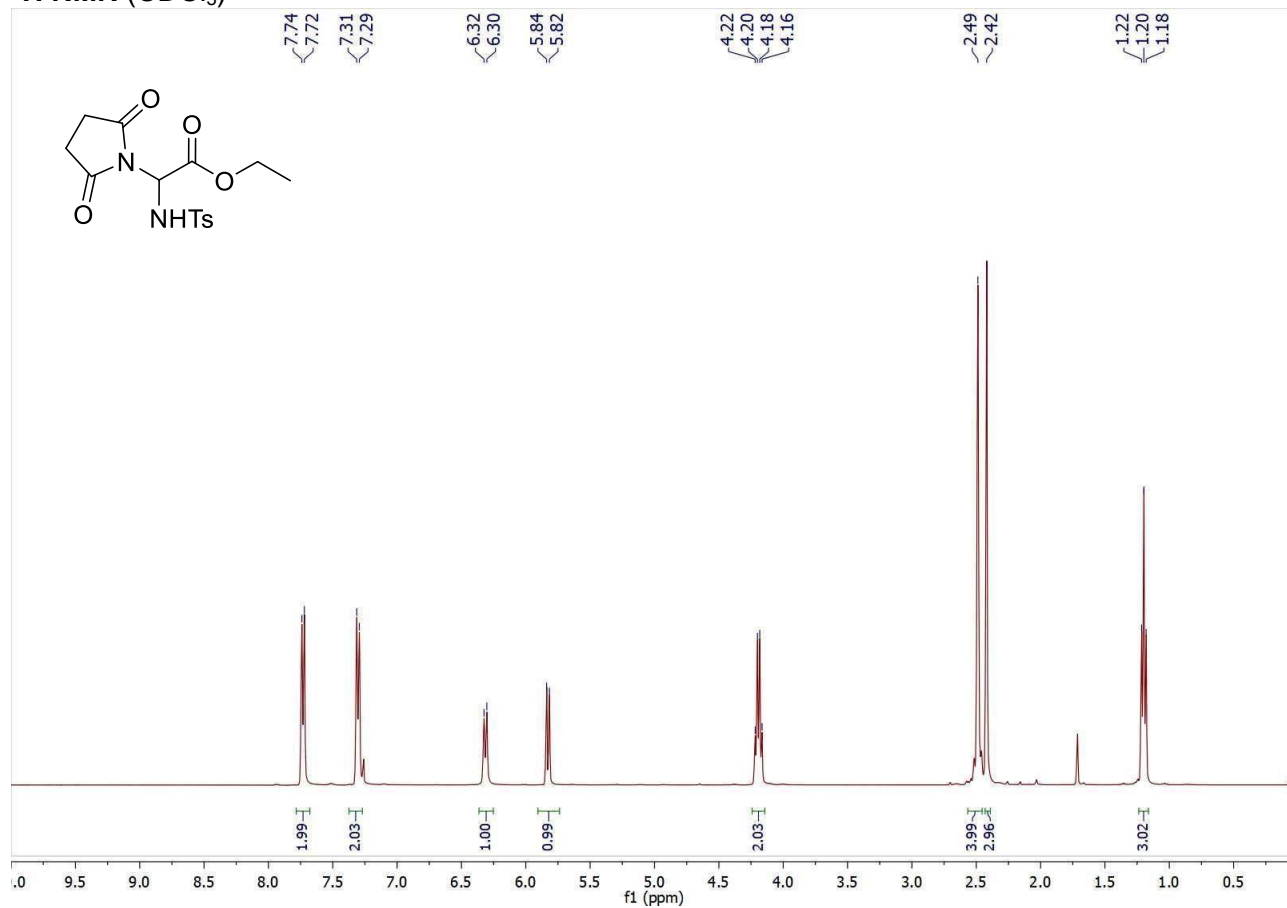

<sup>13</sup>C{<sup>1</sup>H} NMR (CDCl<sub>3</sub>)

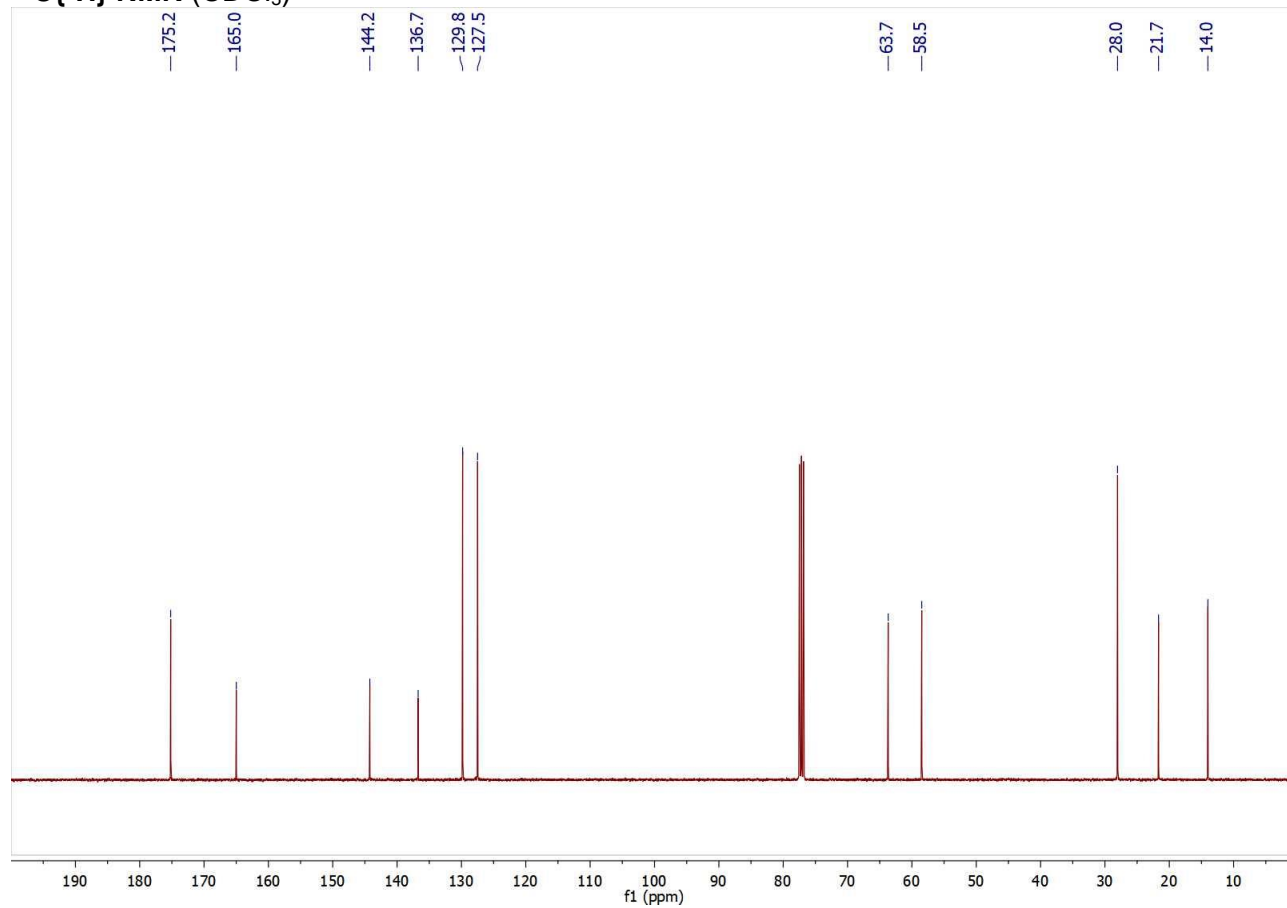

**Ethyl 2-(2,5-dioxopyrrolidin-1-yl)-2-(methylsulfonamido)acetate (2aMs)**

$^1\text{H}$  NMR ( $\text{CDCl}_3$ )

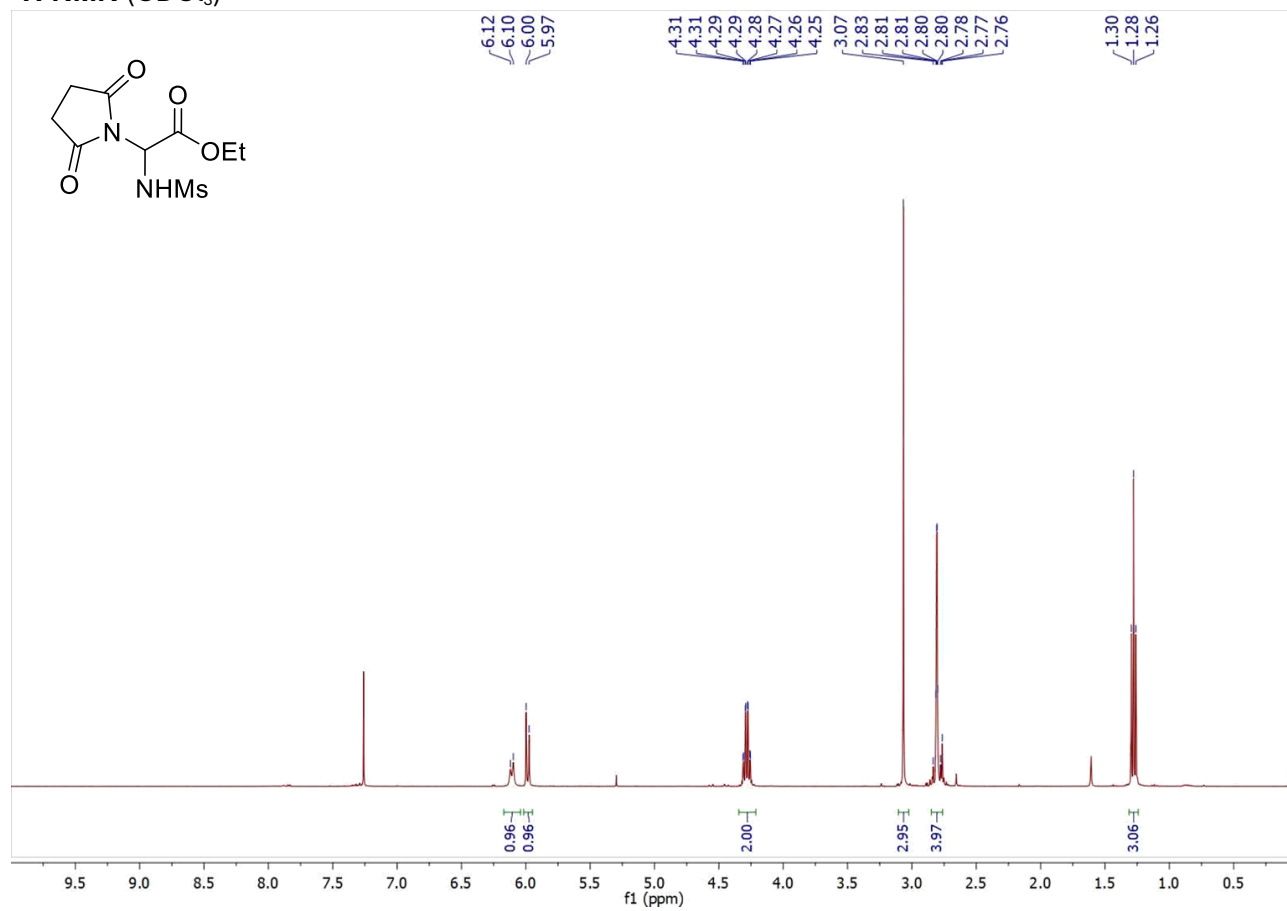

$^{13}\text{C}\{^1\text{H}\}$  NMR ( $\text{CDCl}_3$ )

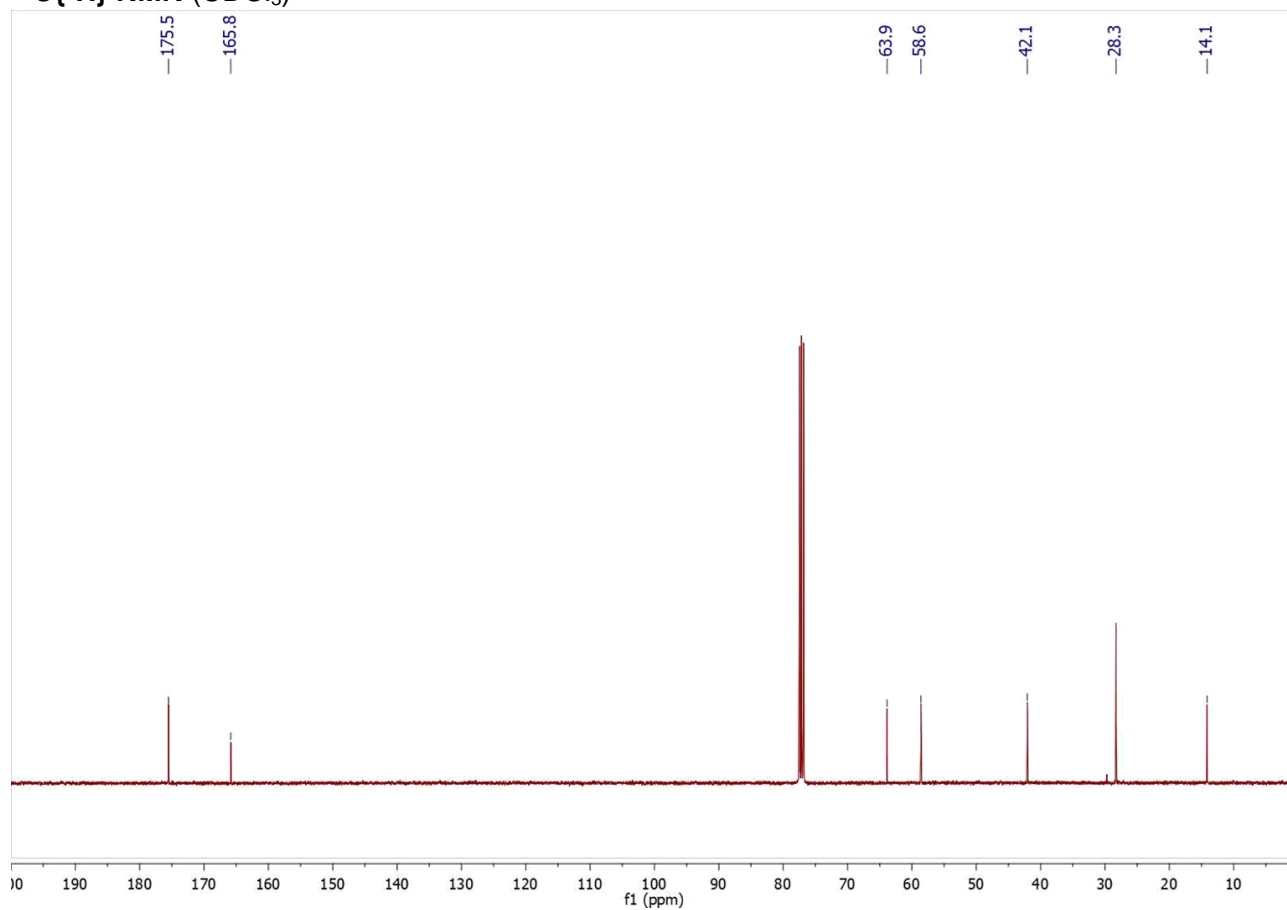

**Ethyl 2-(2,5-dioxopyrrolidin-1-yl)-2-((trifluoromethyl)sulfonamido)acetate (2aTf)**

**$^1\text{H}$  NMR ( $\text{CDCl}_3$ )**

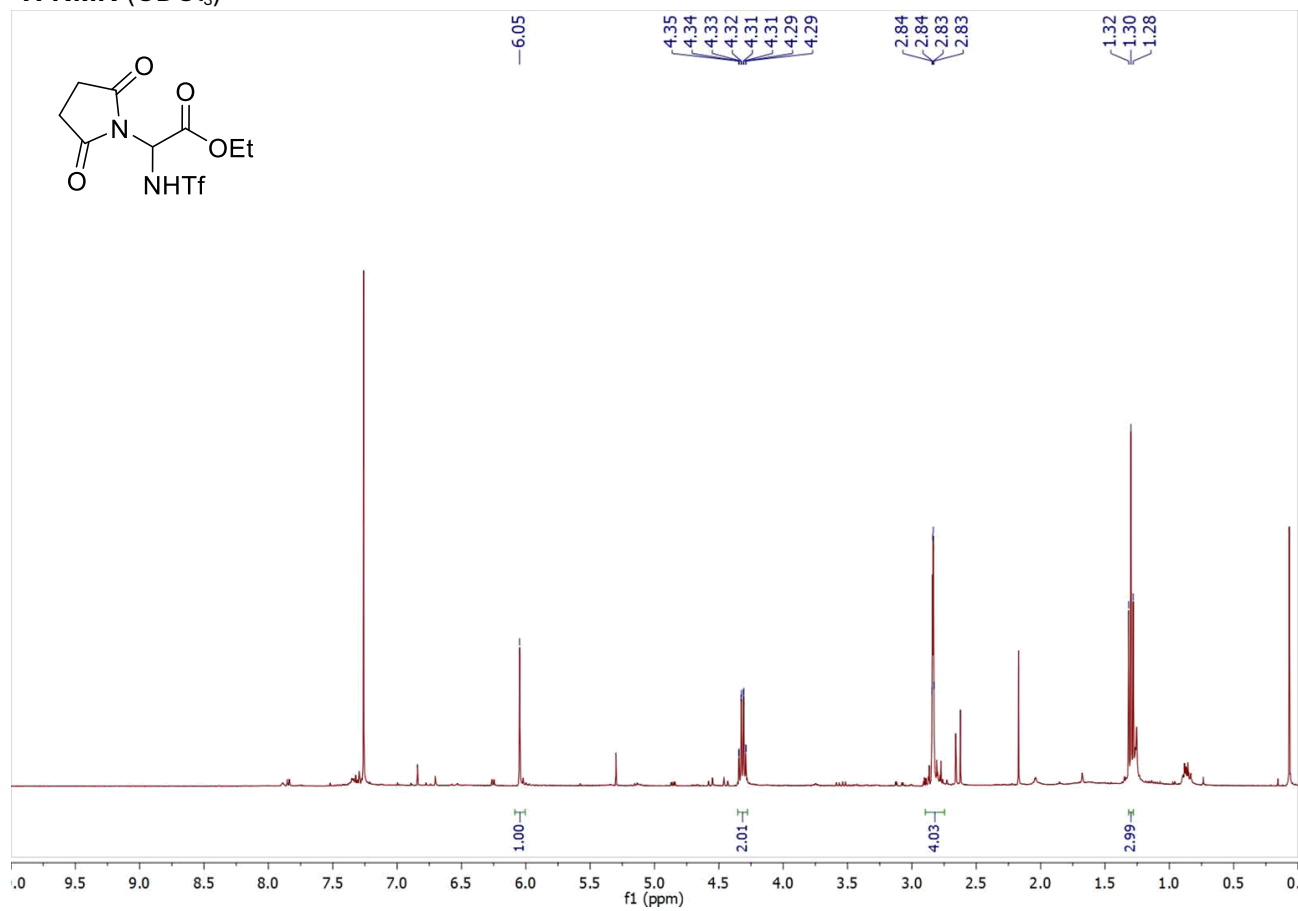

**$^{13}\text{C}\{^1\text{H}\}$  NMR ( $\text{CDCl}_3$ )**

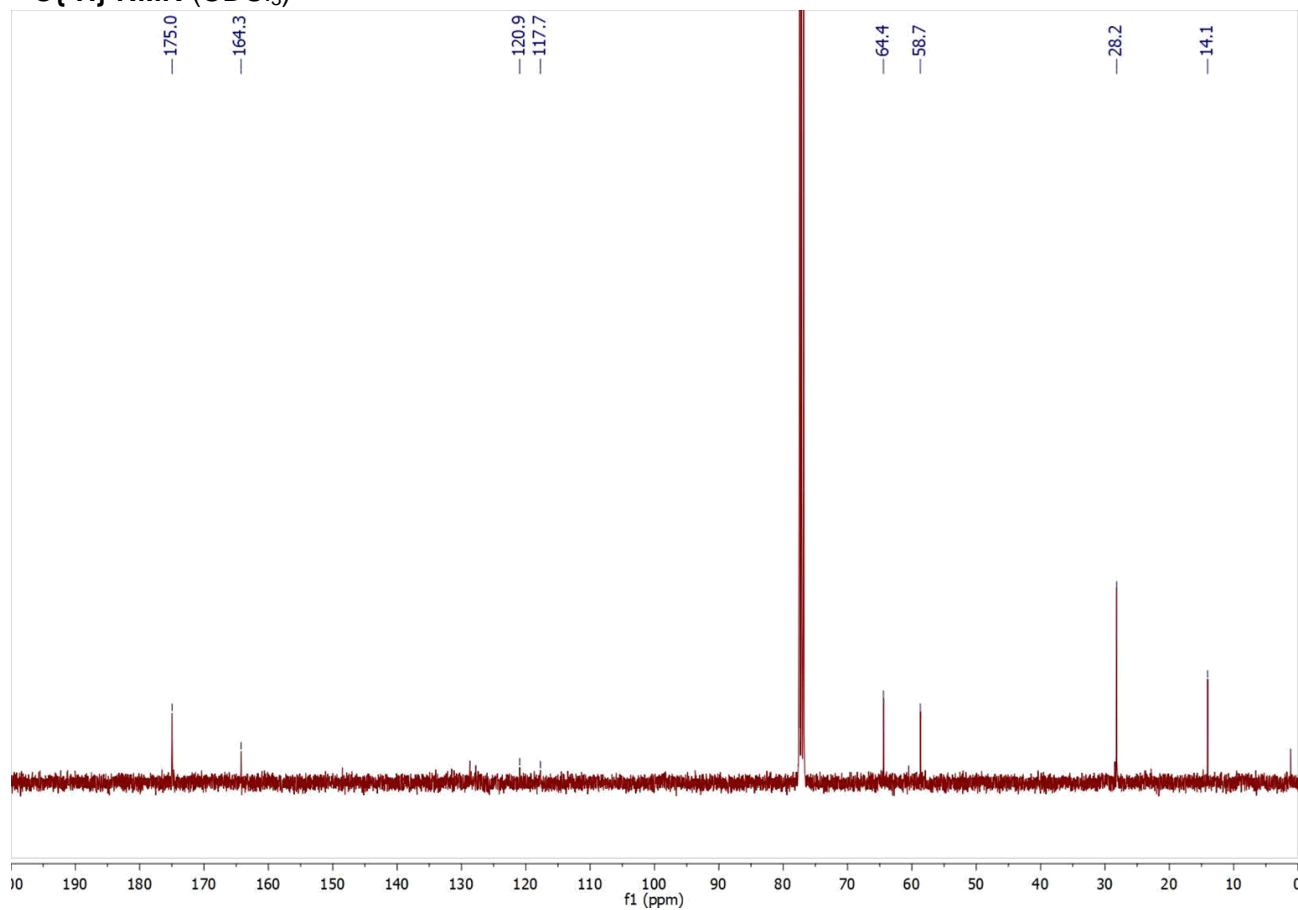



**Methyl-2-(2,5-dioxopyrrolidin-1-yl)-2-(4-methylphenylsulfonamide) acetate (2b)**

<sup>1</sup>H NMR (CDCl<sub>3</sub>)

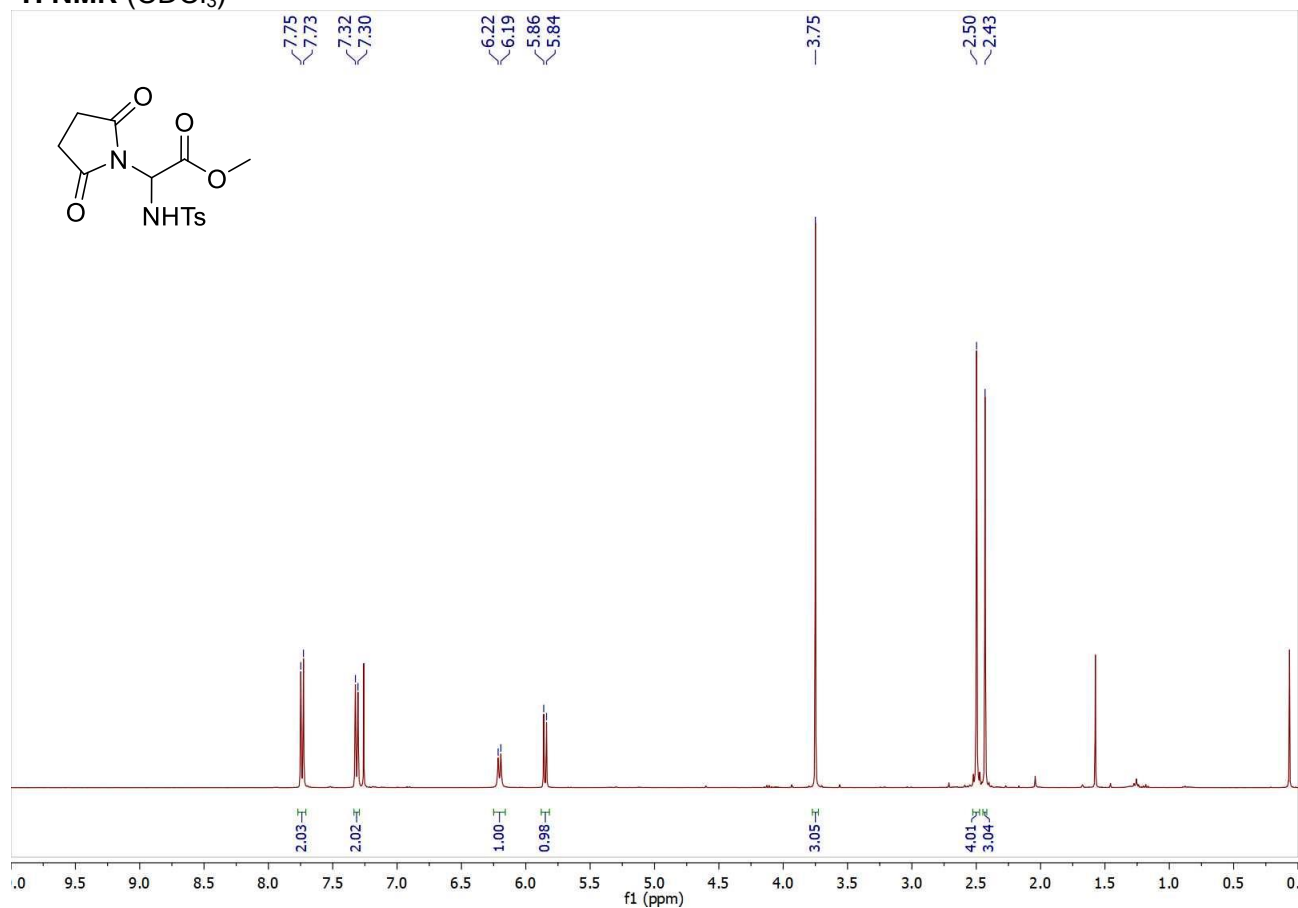

<sup>13</sup>C{<sup>1</sup>H} NMR (CDCl<sub>3</sub>)

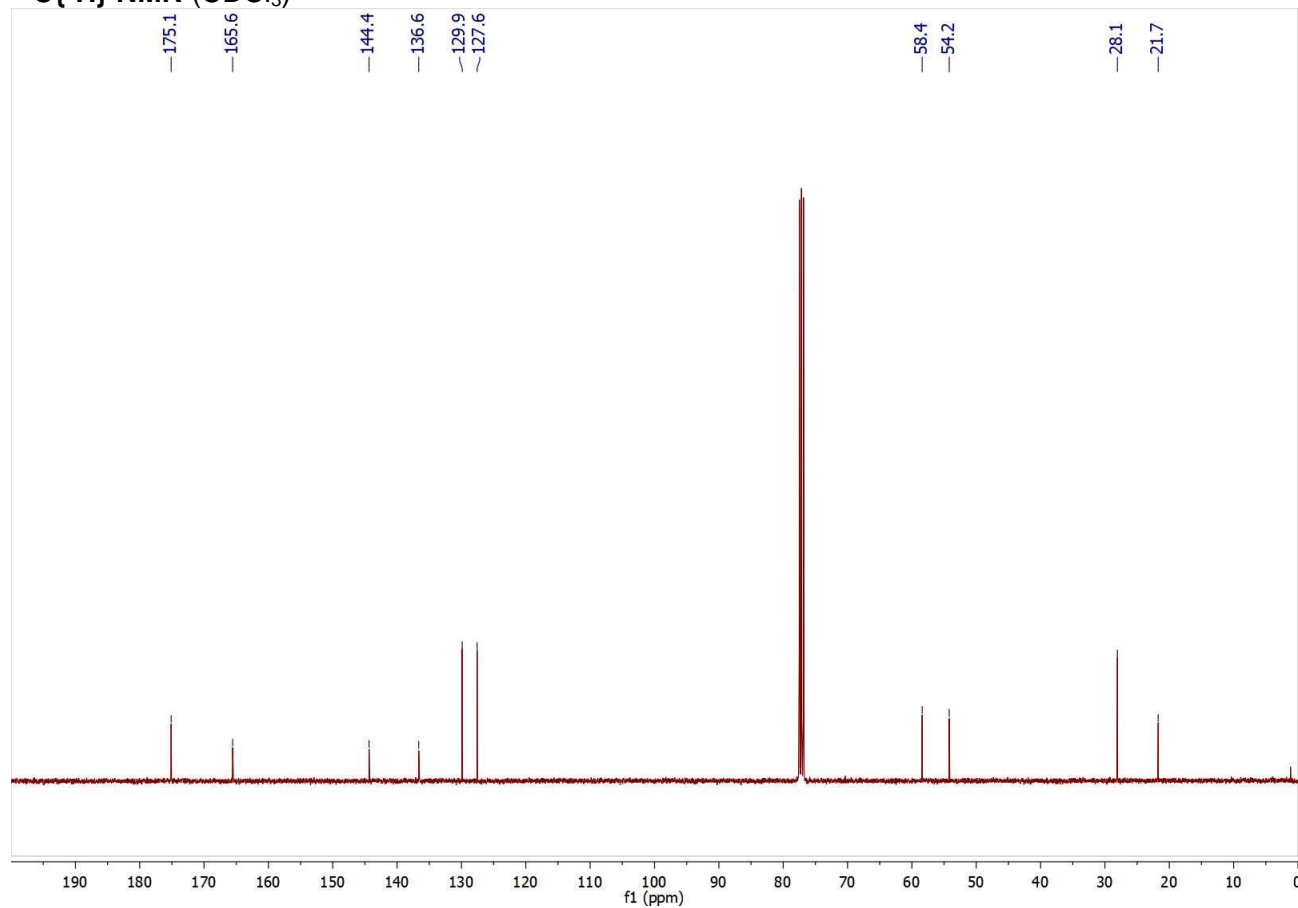

**1,3-Dioxoisindolin-2-yl 2-(2,5-dioxopyrrolidin-1-yl)-2-((4-methylphenyl)sulfonamido) acetate (2c)**

**<sup>1</sup>H NMR (CDCl<sub>3</sub>)**

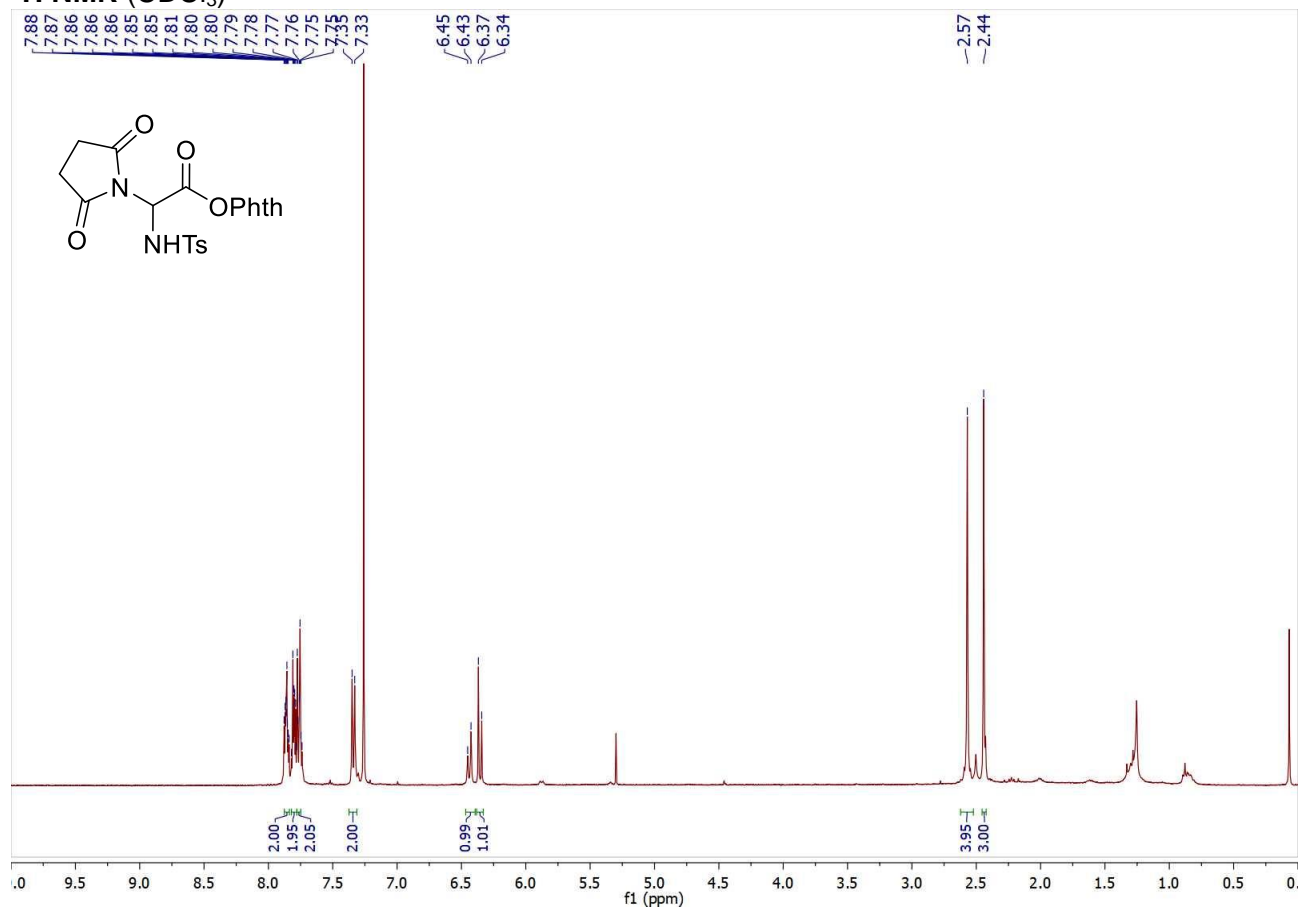

**<sup>13</sup>C{<sup>1</sup>H} NMR (CDCl<sub>3</sub>)**

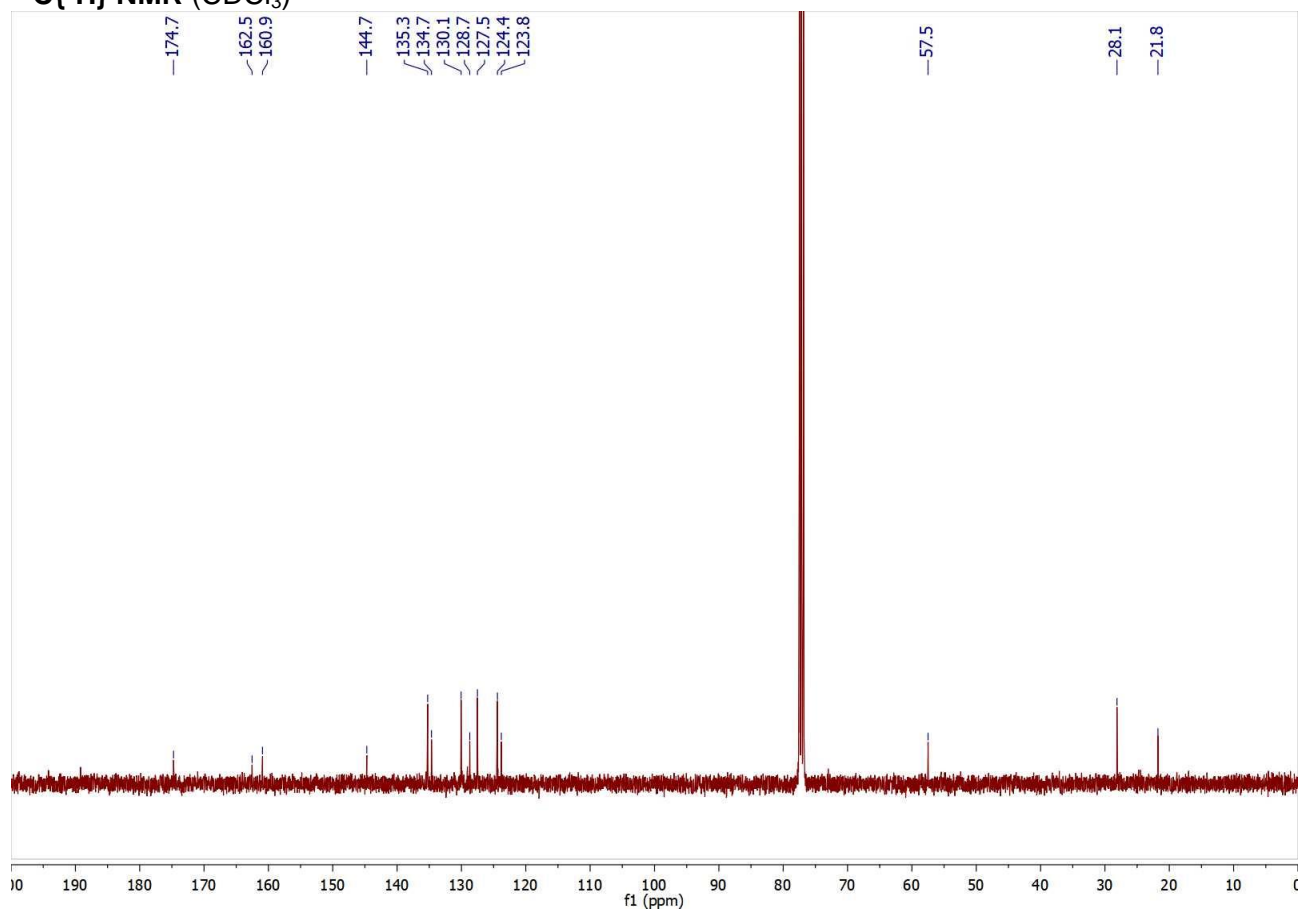

**2-(2,5-Dioxopyrrolidin-1-yl)-*N*-methoxy-*N*-methyl-2-((4-methylphenyl)sulfonamido) acetamide (2d)**

**<sup>1</sup>H NMR (CDCl<sub>3</sub>)**

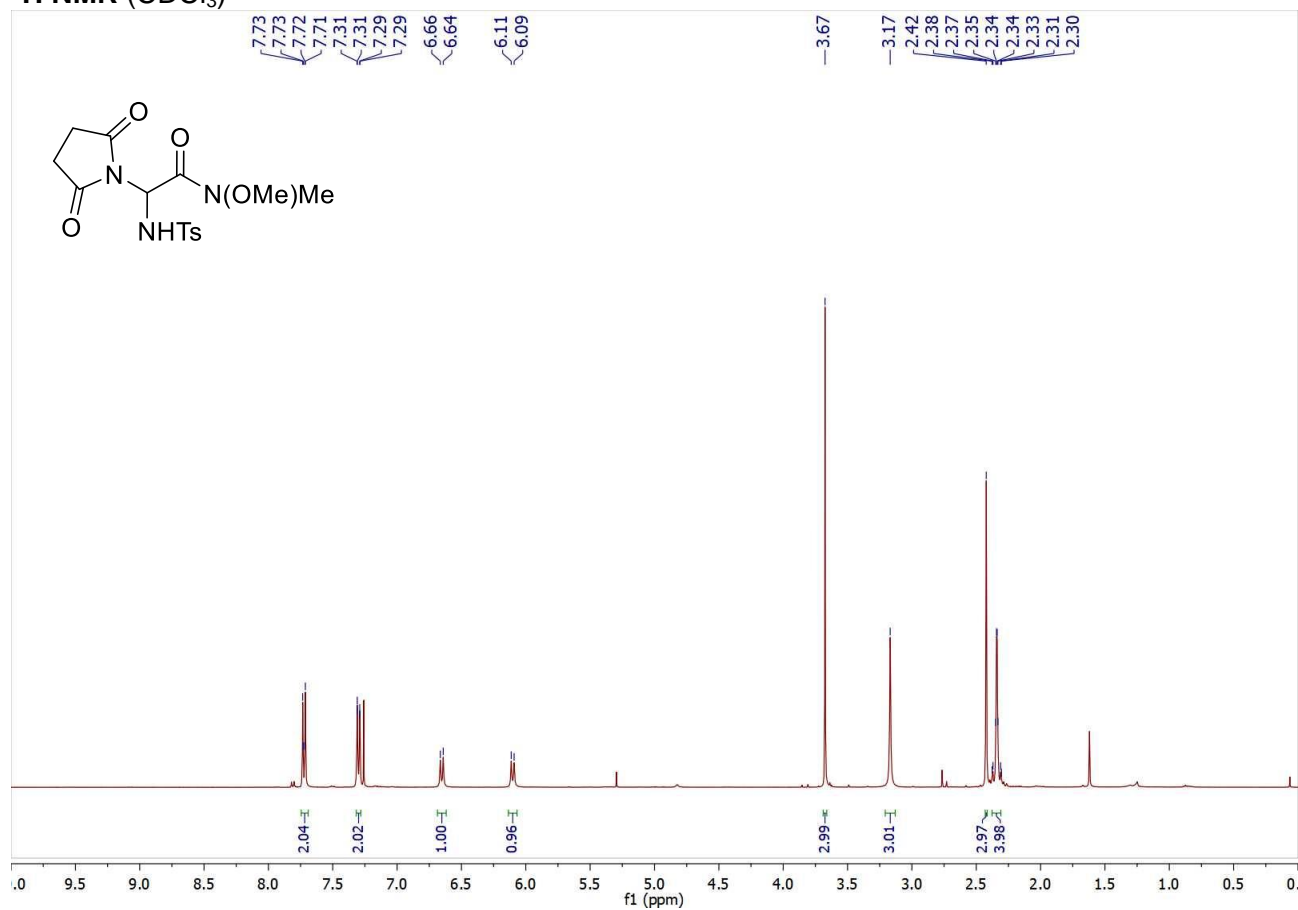

**<sup>13</sup>C{<sup>1</sup>H} NMR (CDCl<sub>3</sub>)**

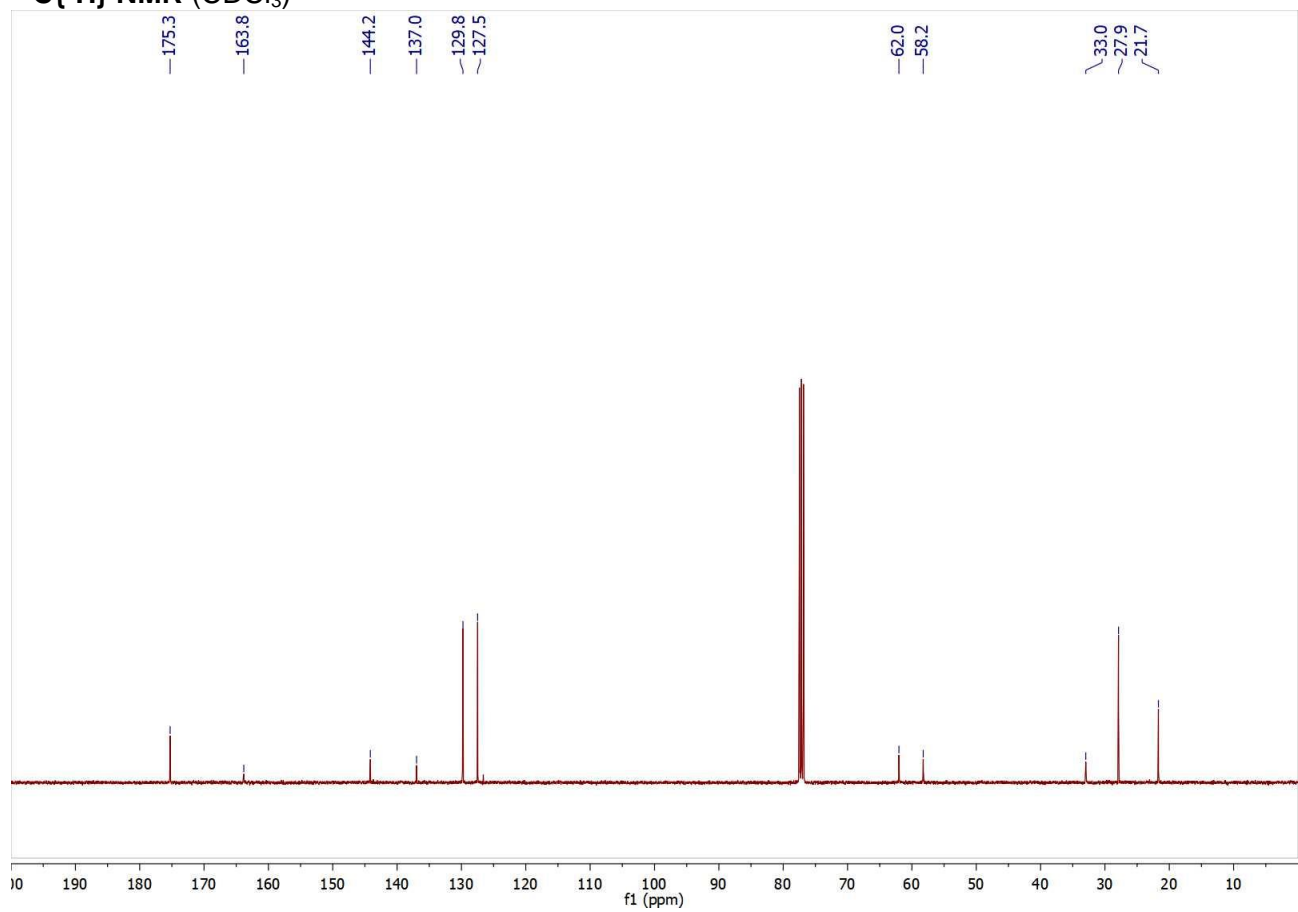

**2-(2,5-Dioxopyrrolidin-1-yl)-2-(4-methylphenylsulfonamide)acetamide (2e)**

<sup>1</sup>H NMR (CDCl<sub>3</sub>)

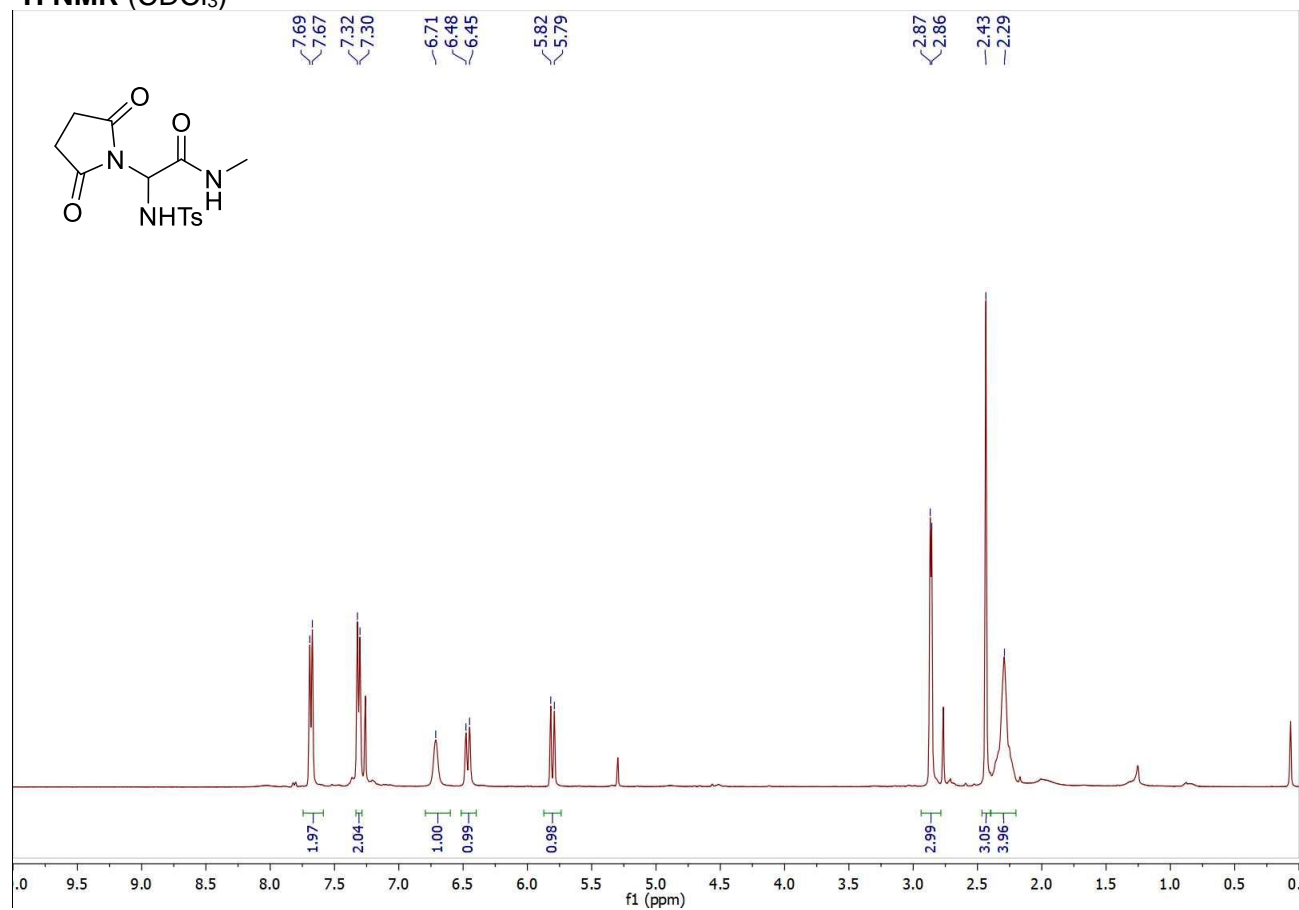

<sup>13</sup>C{<sup>1</sup>H} NMR (CDCl<sub>3</sub>)

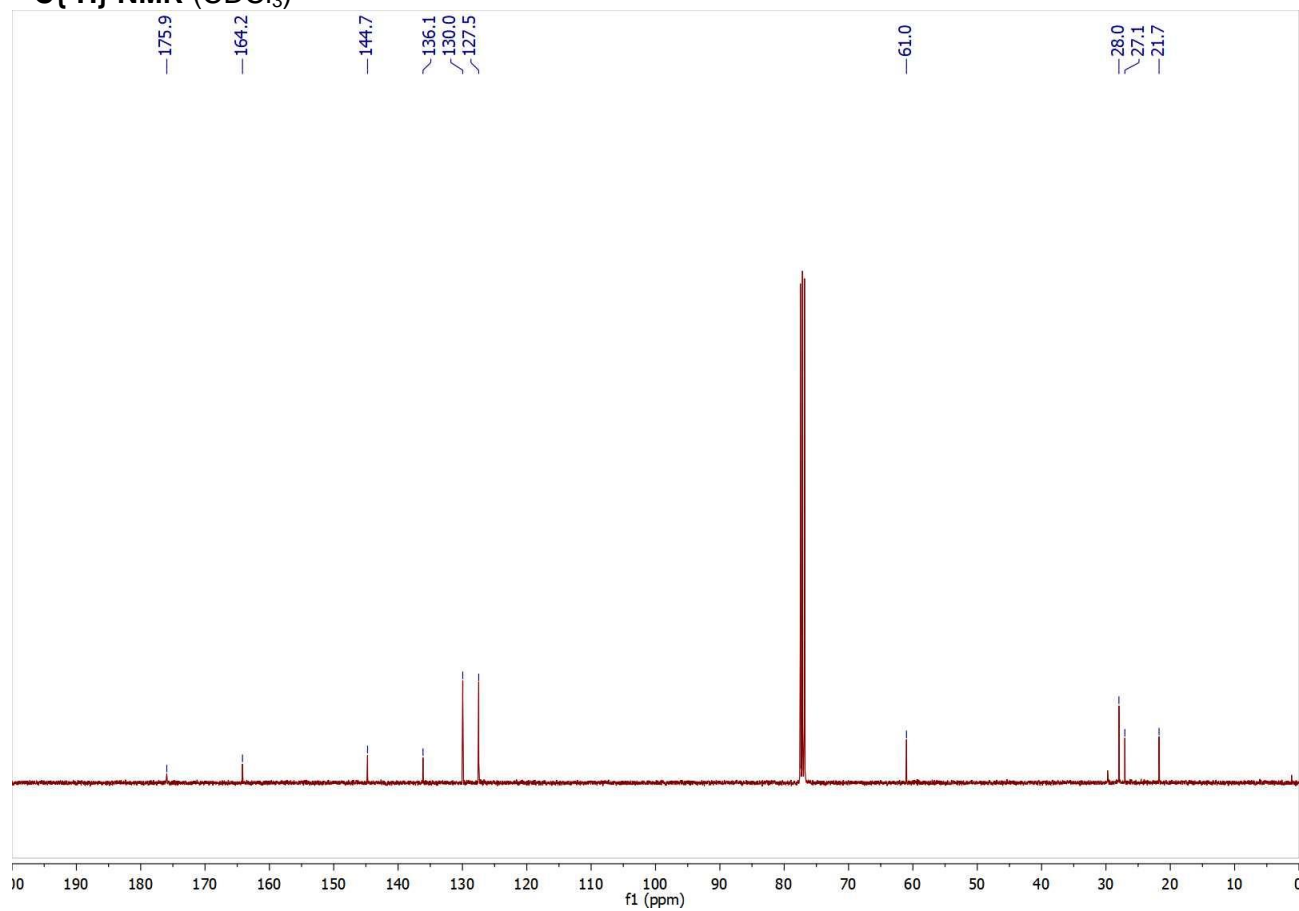

**N-Benzy-2-(2,5-dioxopyrrolidin-1-yl)-2-((4-methylphenyl)sulfonamido)acetamide (2f)**

**<sup>1</sup>H NMR (CDCl<sub>3</sub>)**

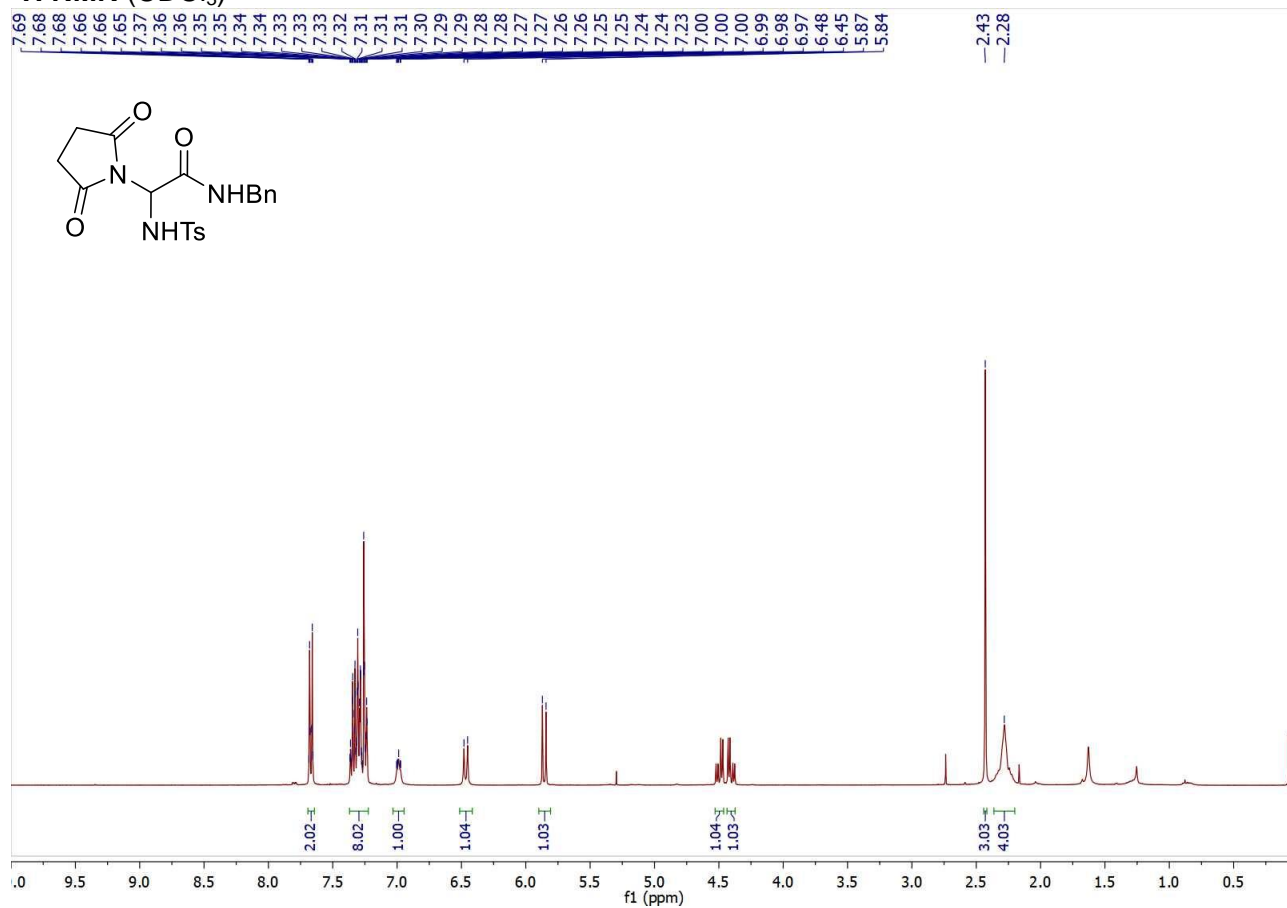

**<sup>13</sup>C{<sup>1</sup>H} NMR (CDCl<sub>3</sub>)**

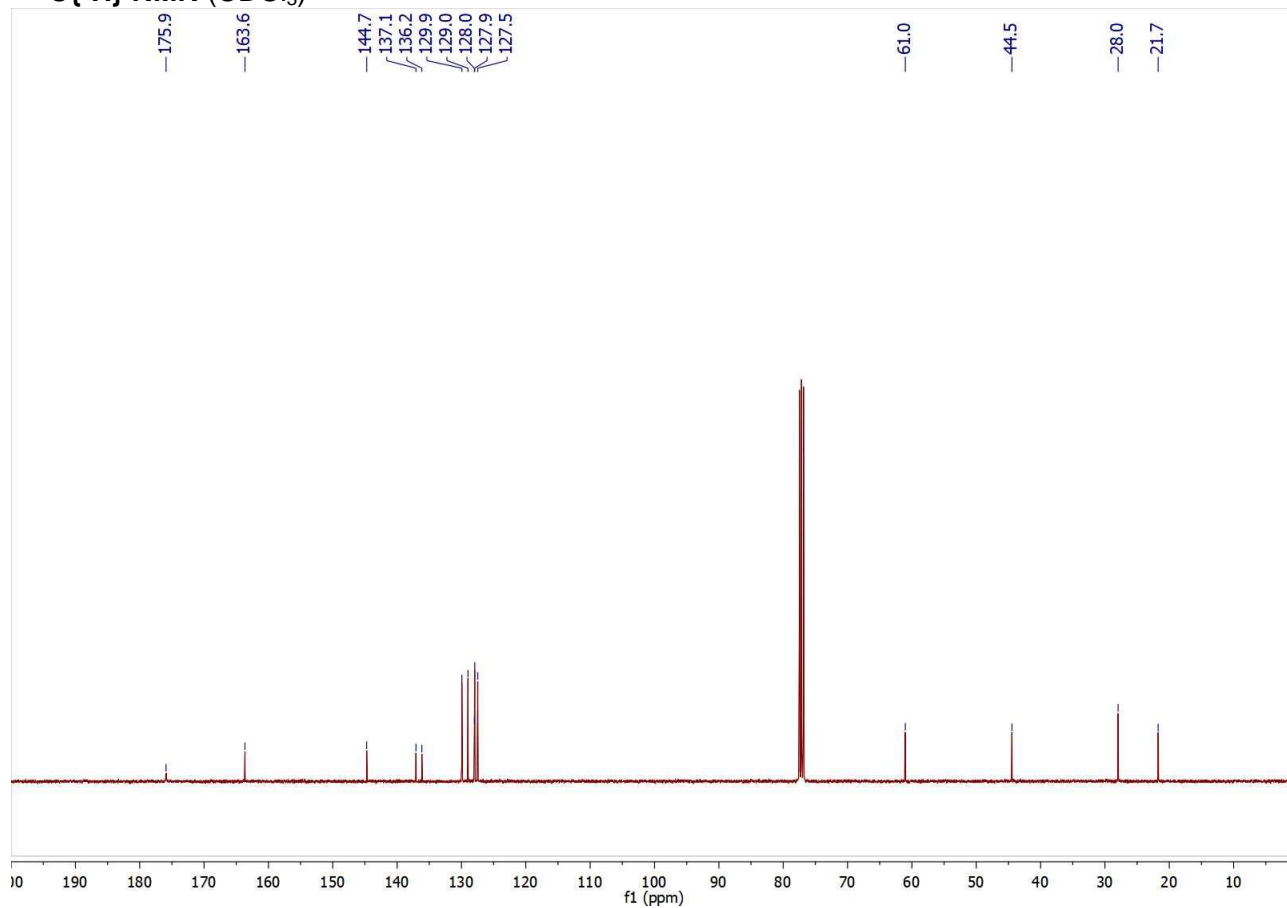

**2-(2,5-Dioxopyrrolidin-1-yl)-2-((4-methylphenyl)sulfonamido)-*N*-((*S*)-2-(naphthalen-1-yl)ethyl)acetamide (2g) (Major diastereomer)**

**<sup>1</sup>H NMR (CDCl<sub>3</sub>)**

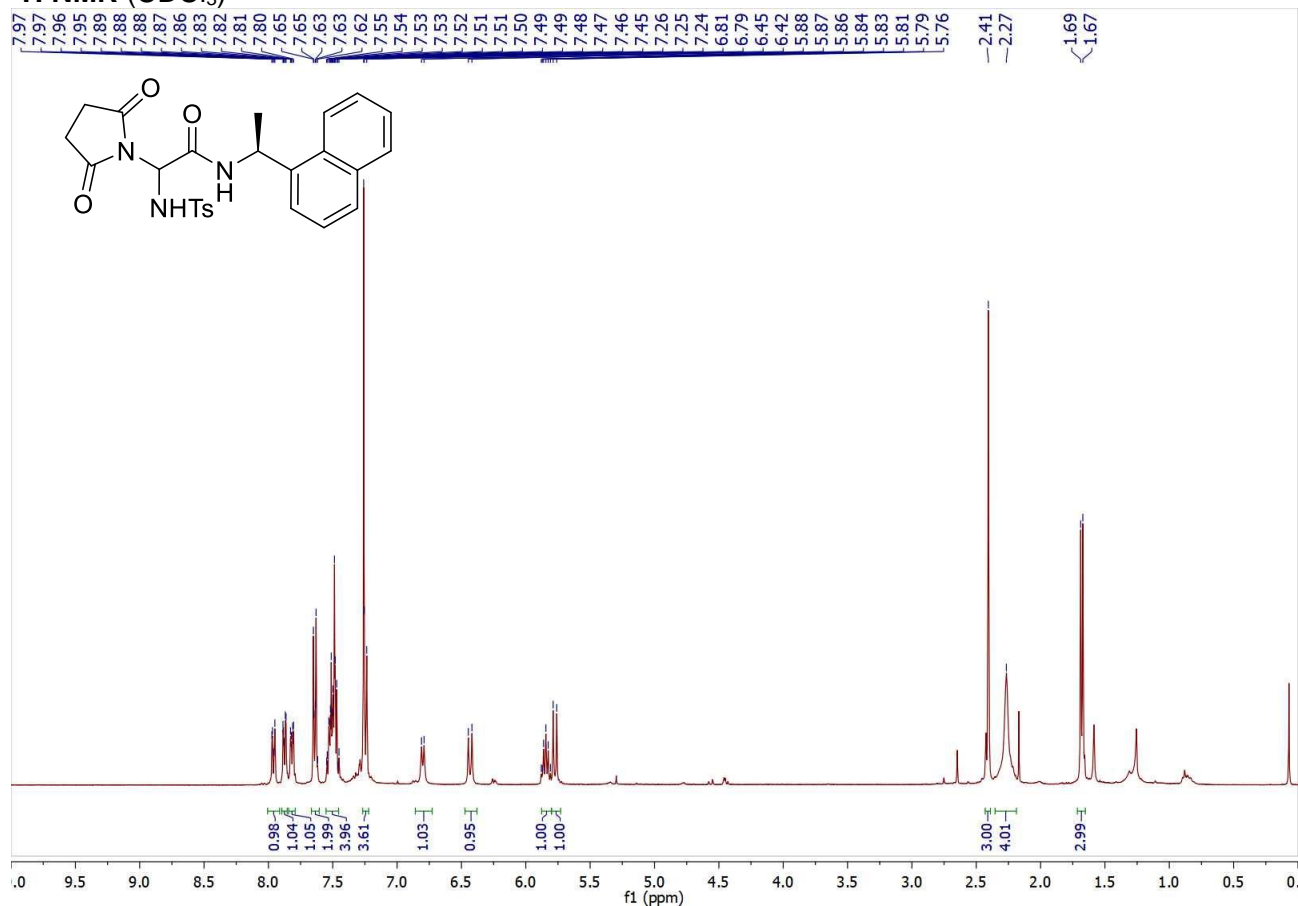

**<sup>13</sup>C{<sup>1</sup>H} NMR (CDCl<sub>3</sub>)**

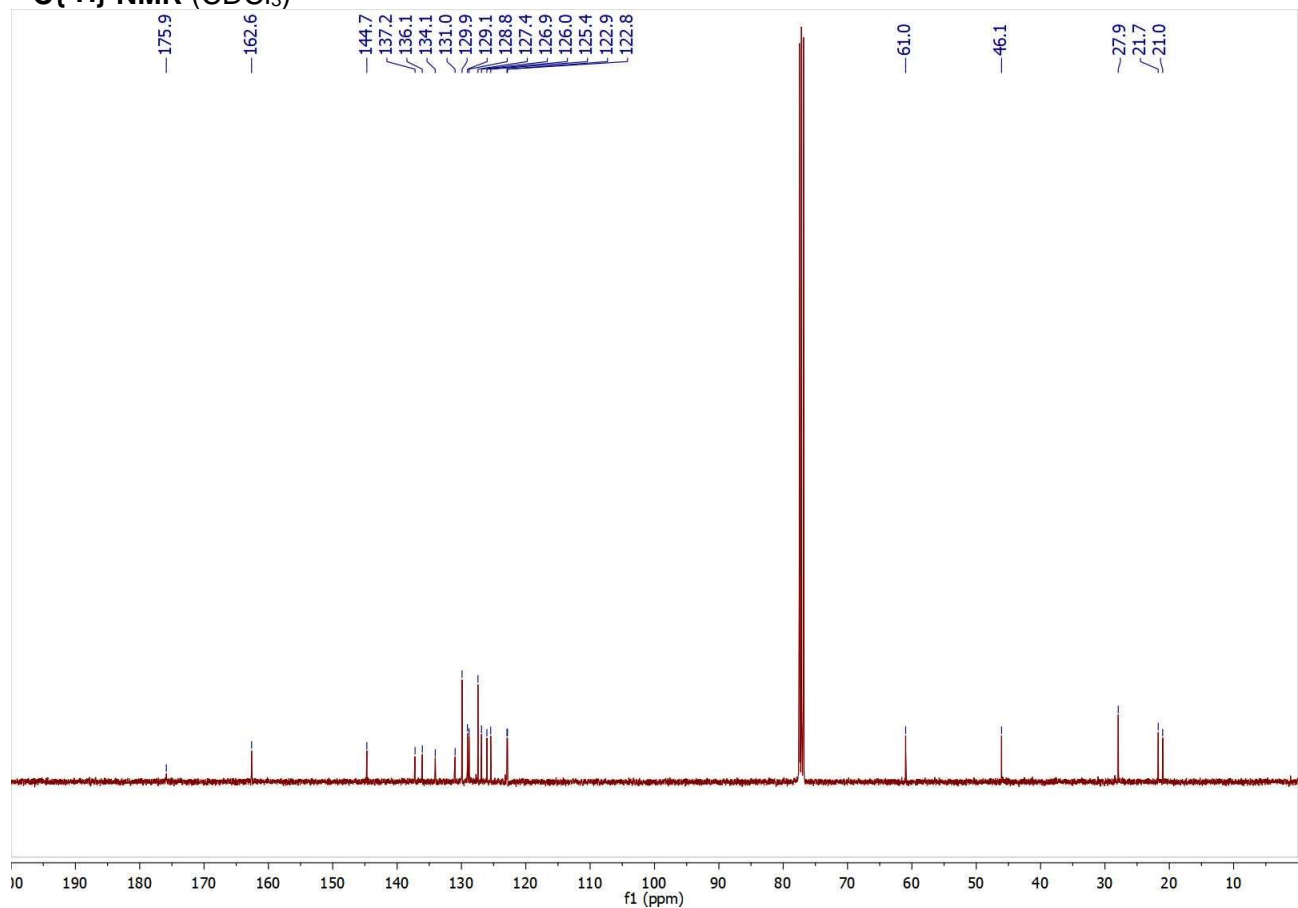

***N*-(Cyano(2,5-dioxopyrrolidin-1-yl)methyl)-4-methylbenzensulfonamide (2h)**

<sup>1</sup>H NMR (CD<sub>3</sub>COCD<sub>3</sub>)

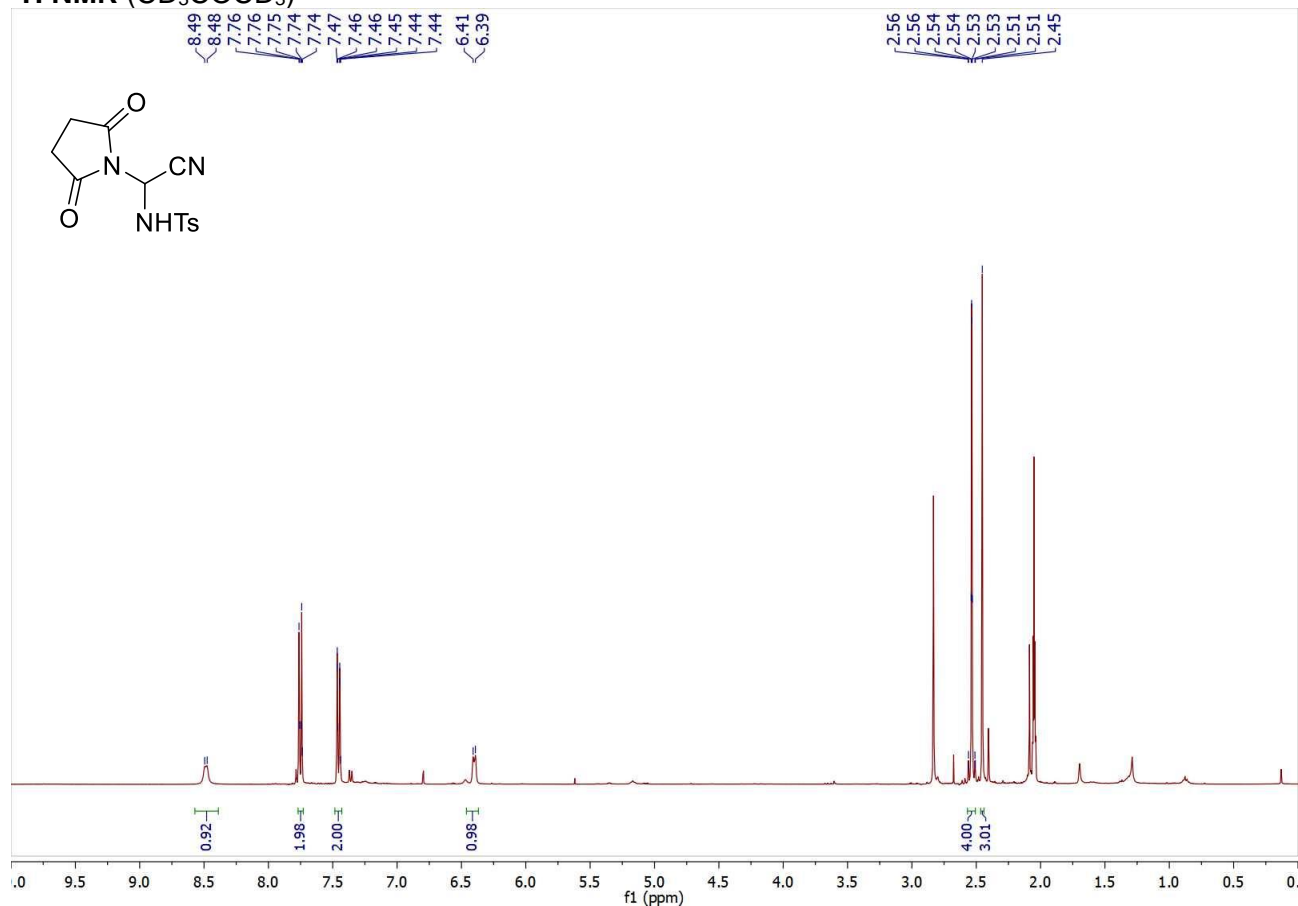

<sup>13</sup>C{<sup>1</sup>H} NMR (CD<sub>3</sub>COCD<sub>3</sub>)

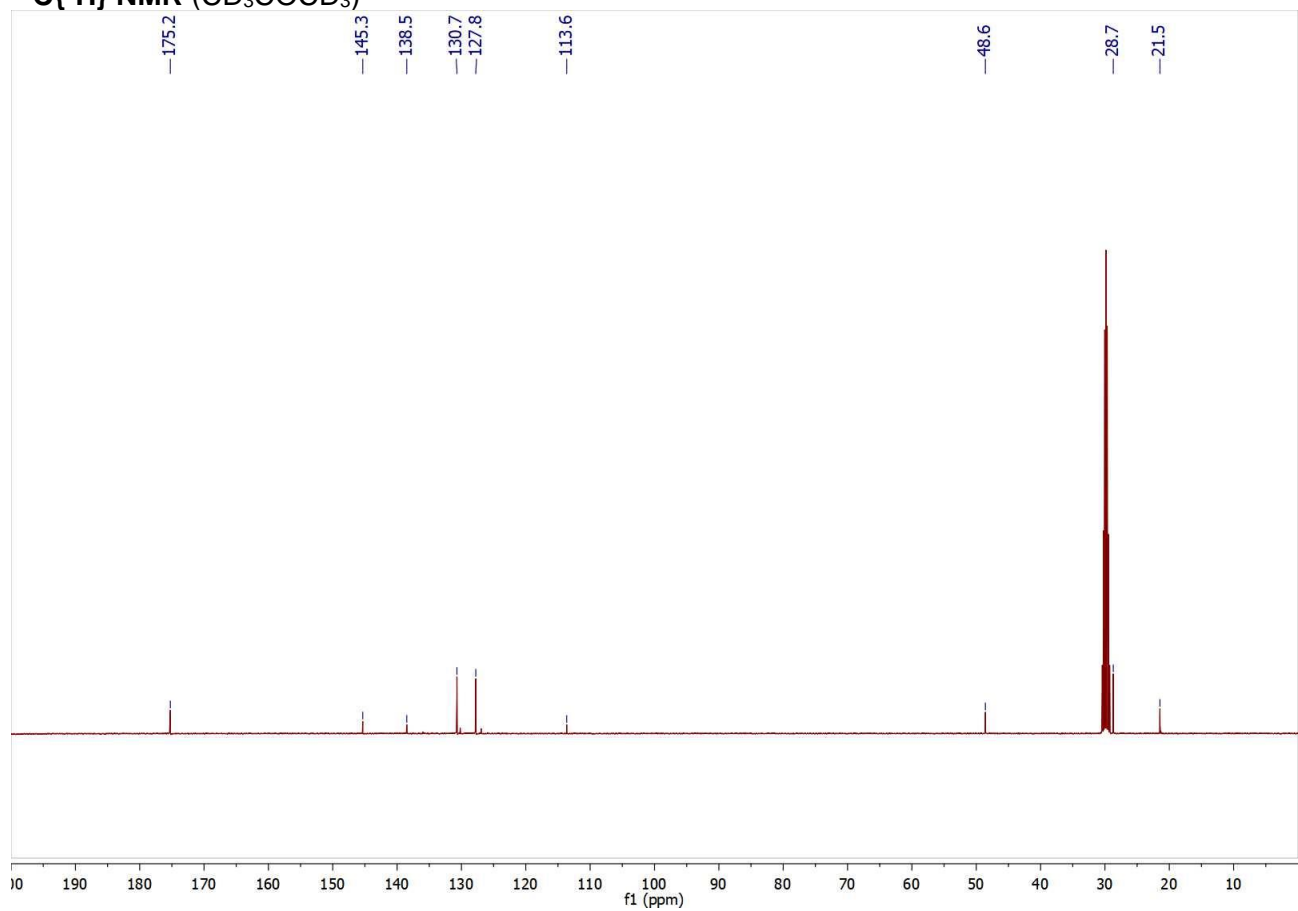

***N*-((2,5-Dioxopyrrolidin-1-yl)methyl)-2-(4-methylbencensulfonamide) (2i)**

<sup>1</sup>H NMR (CDCl<sub>3</sub>)

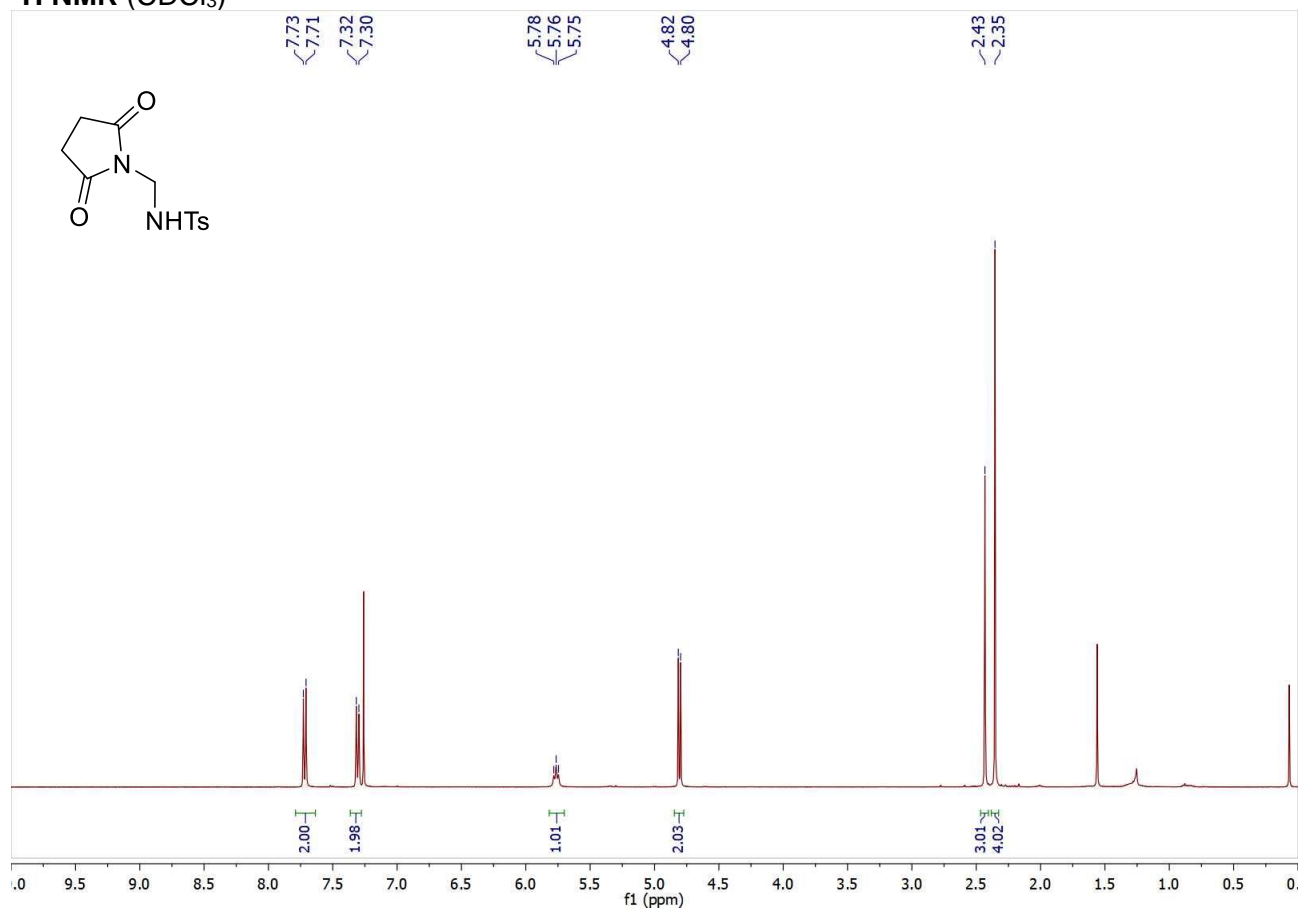

<sup>13</sup>C{<sup>1</sup>H} NMR (CDCl<sub>3</sub>)

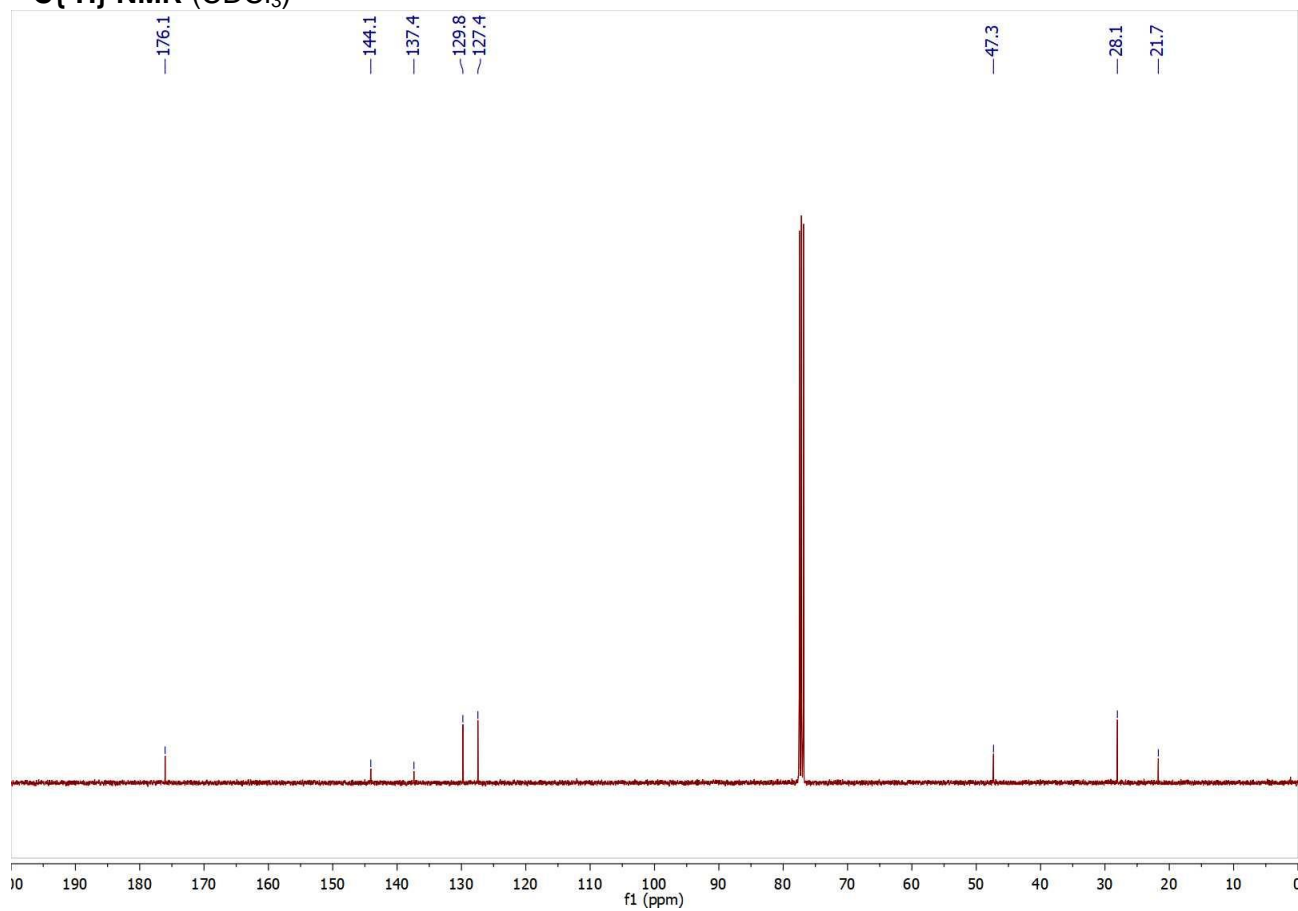



***N*-(1-(2,5-Dioxopyrrolidin-1-yl)-2-phenylethyl)-4-methylbenzensulfonamide (2j)**

<sup>1</sup>H NMR (CDCl<sub>3</sub>)

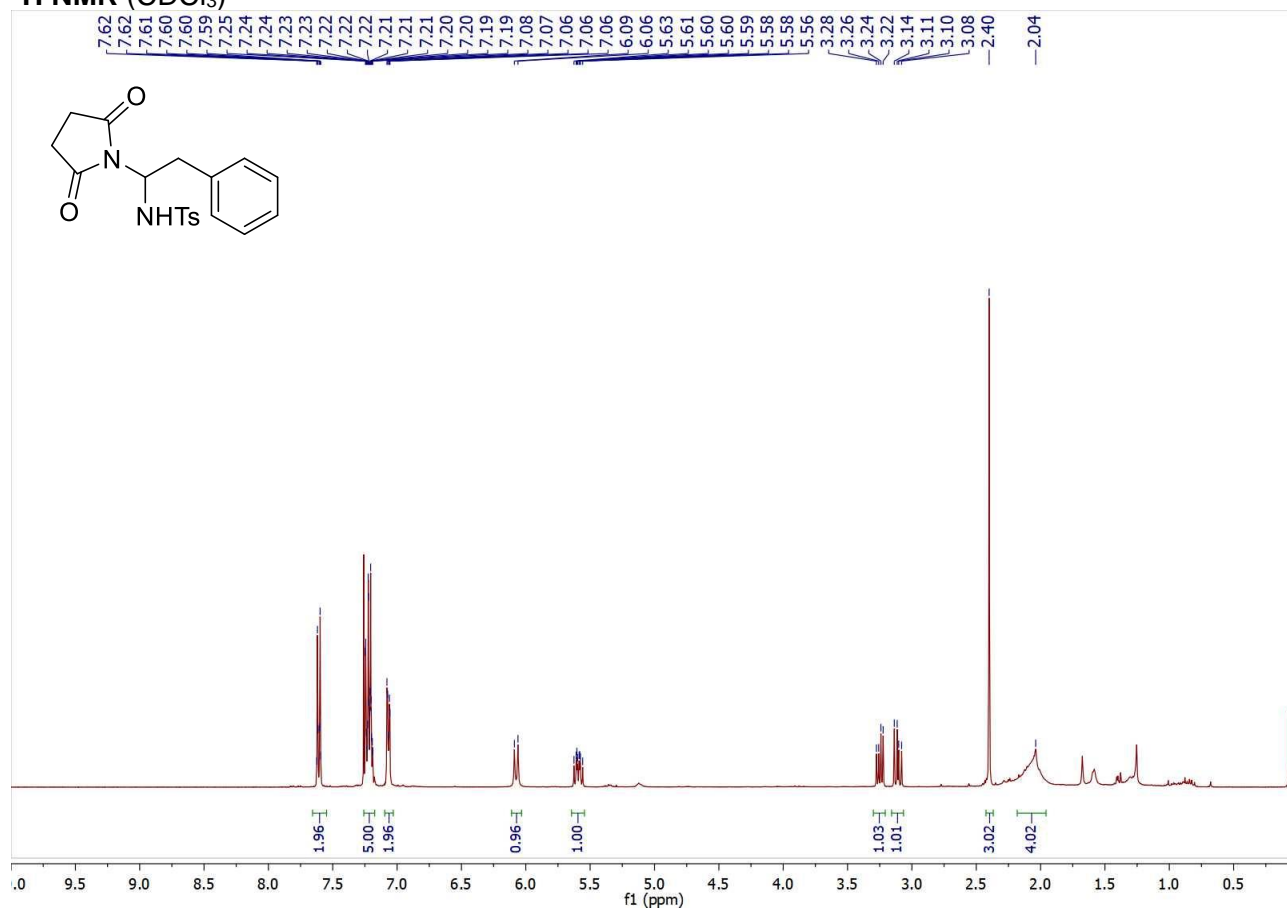

<sup>13</sup>C{<sup>1</sup>H} NMR (CDCl<sub>3</sub>)

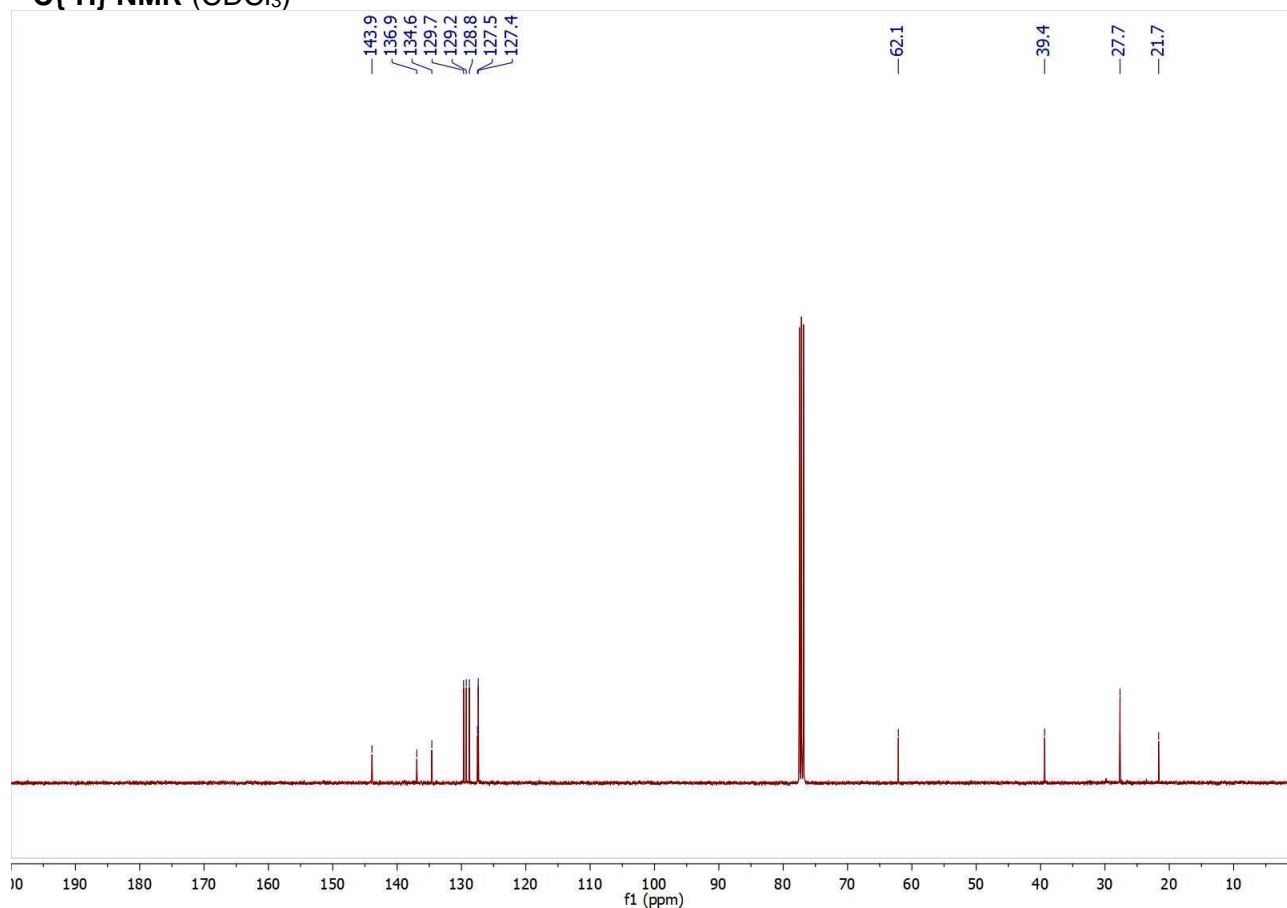

***N,N'*-(1-(2,5-Dioxopyrrolidin-1-yl)ethane-1,2-diyl)bis(4-methylbenzensulfonamide) (2k)**

**<sup>1</sup>H NMR (CD<sub>3</sub>COCD<sub>3</sub>)**

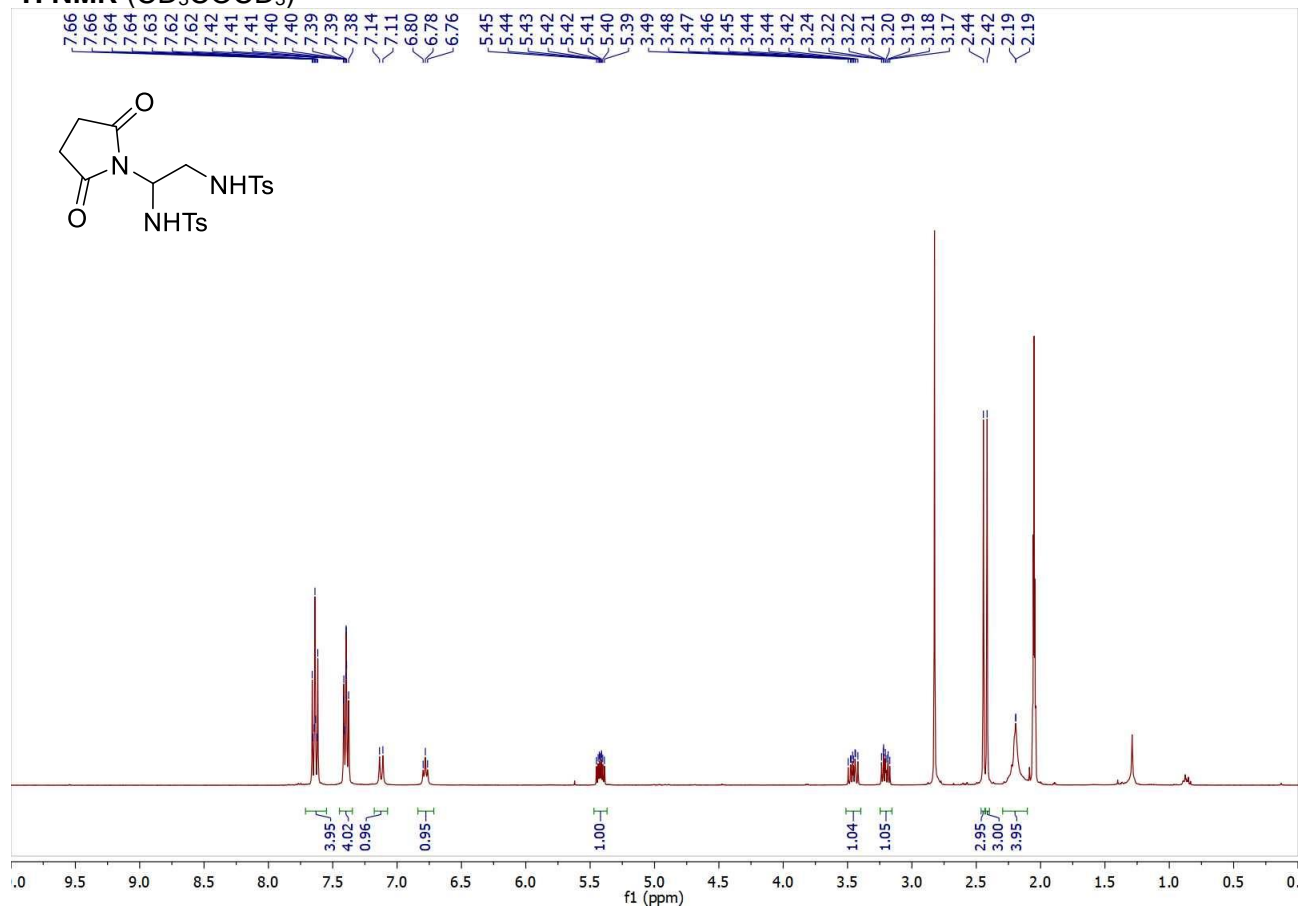

**<sup>13</sup>C{<sup>1</sup>H} NMR (CD<sub>3</sub>COCD<sub>3</sub>)**

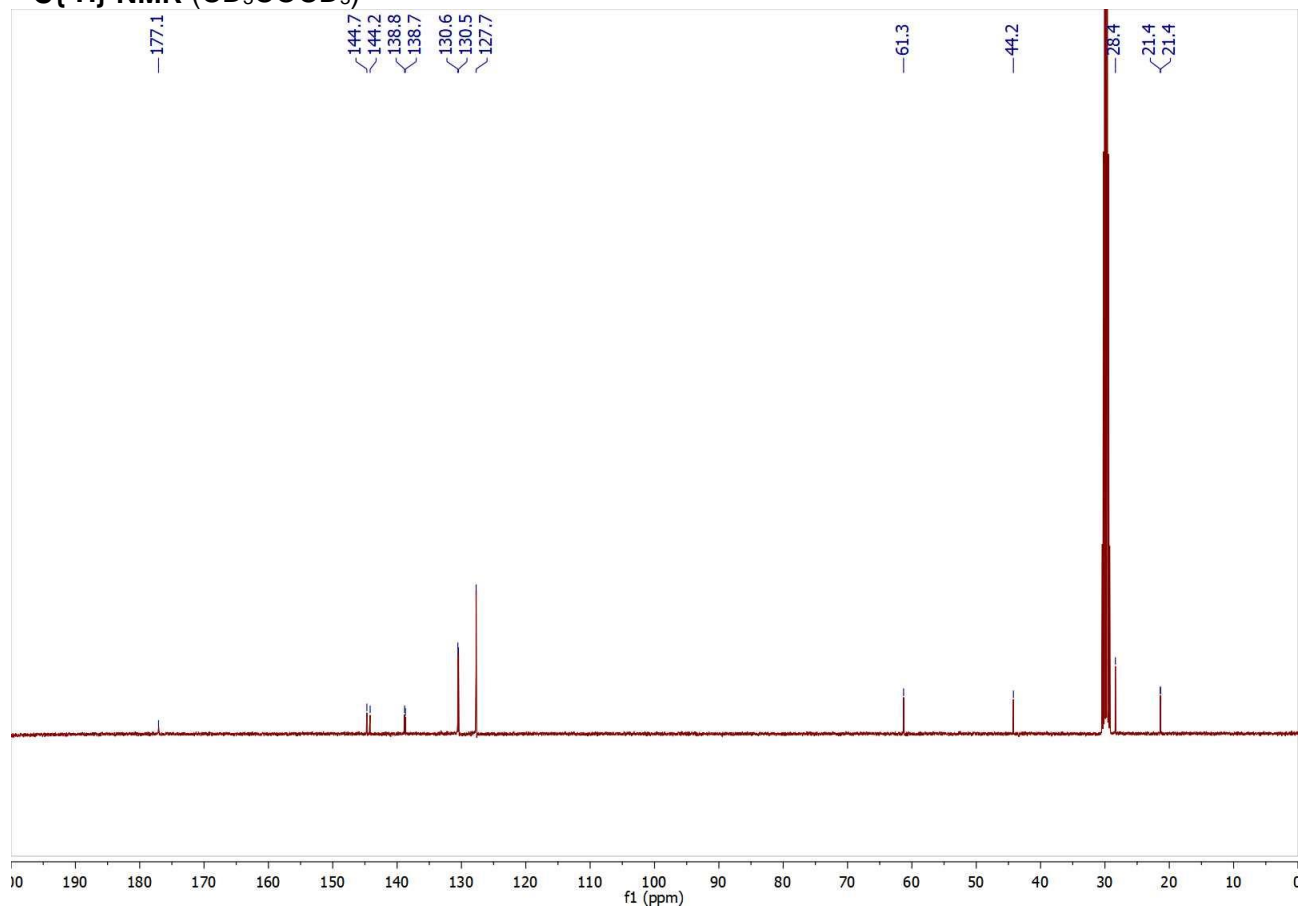

**(S)-4-Methyl-N-(1-tosyl-1,2,3,4-tetrahydroquinolin-3-yl)benzonsulfonamide (S8)**

<sup>1</sup>H NMR (CDCl<sub>3</sub>)

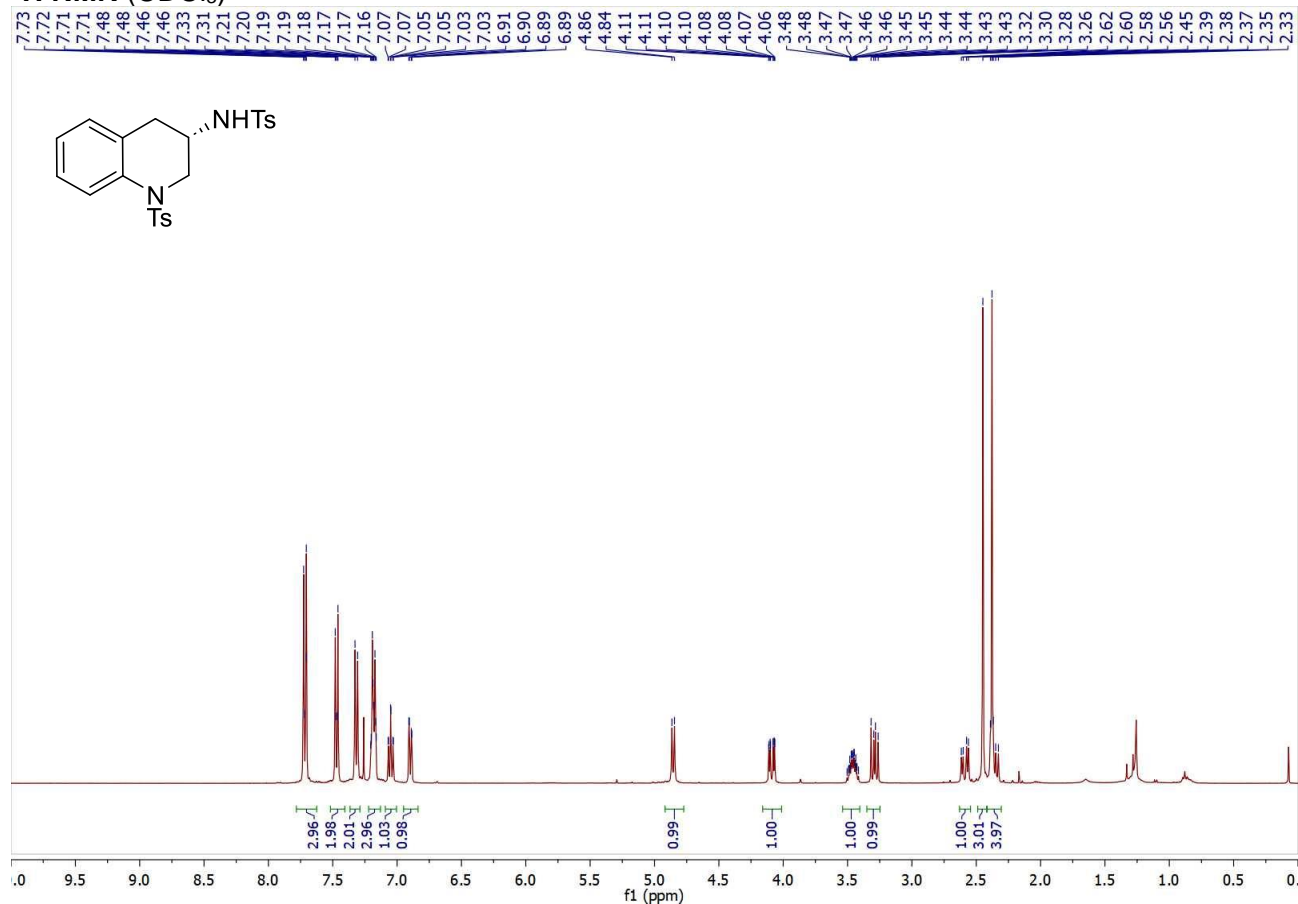

<sup>13</sup>C{<sup>1</sup>H} NMR (CDCl<sub>3</sub>)

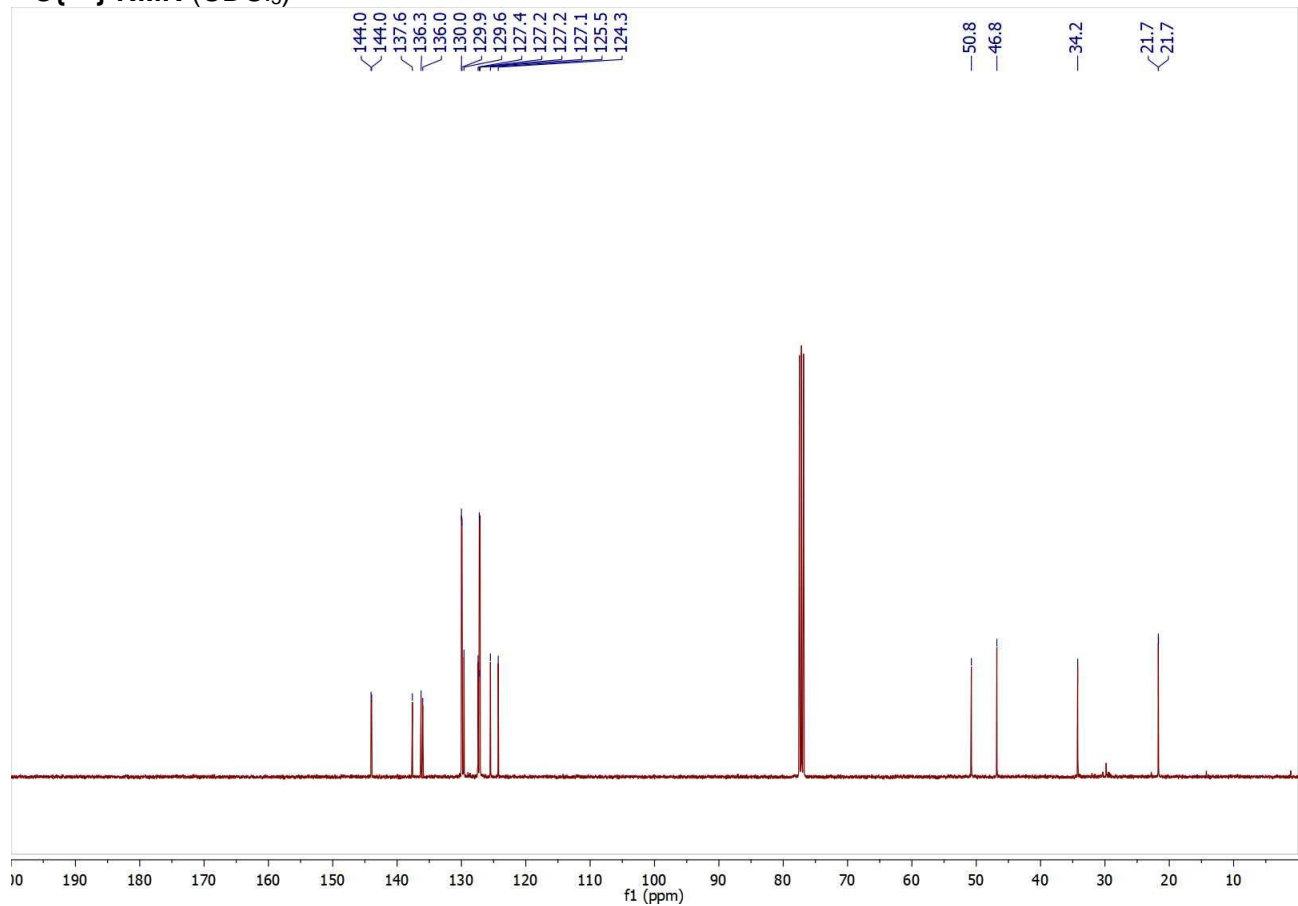

***N*-(2-Azido-1-(2,5-dioxopyrrolidin-1-yl)ethyl)-4-methylbenzensulfonamide (2l)**

<sup>1</sup>H NMR (CDCl<sub>3</sub>)

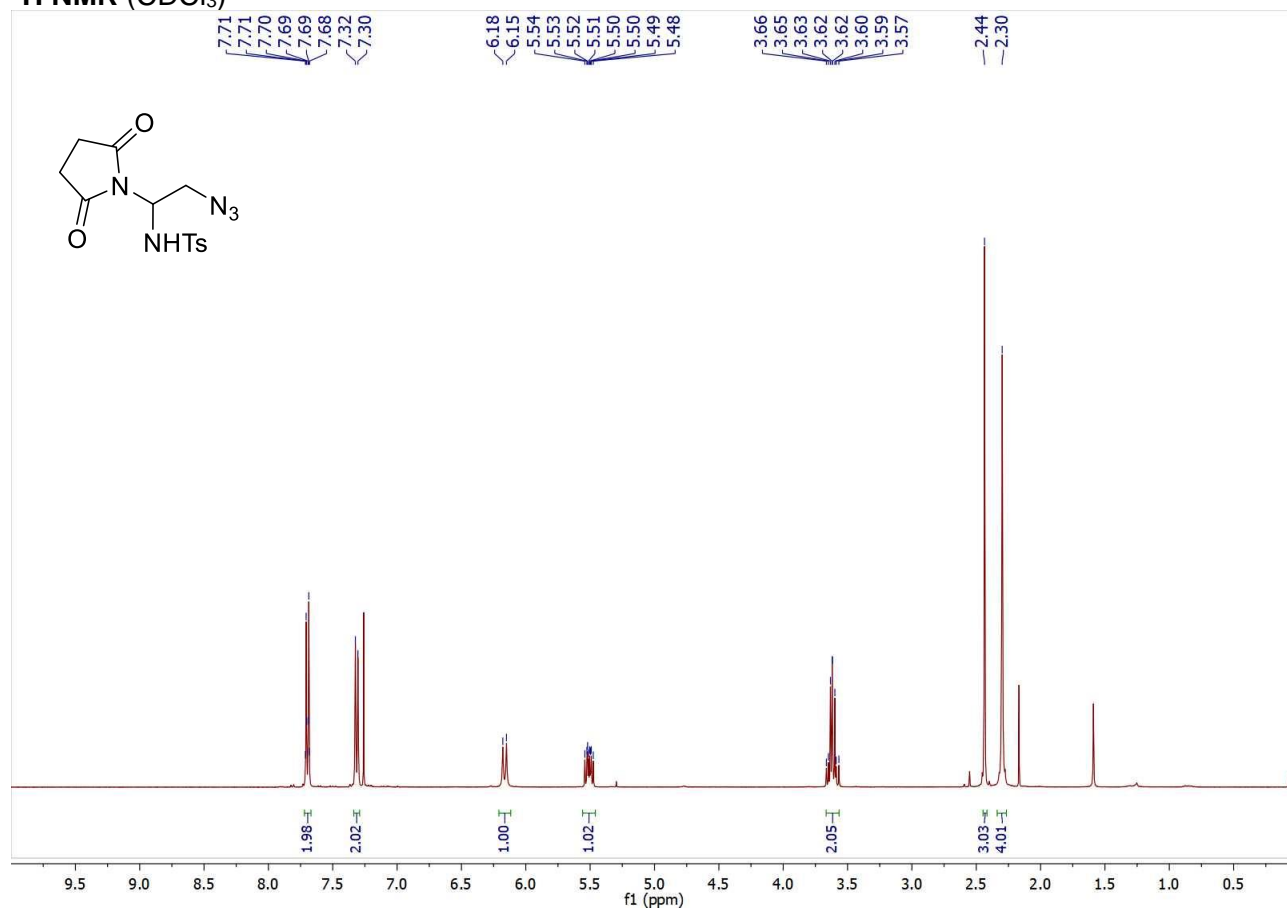

<sup>13</sup>C{<sup>1</sup>H} NMR (CDCl<sub>3</sub>)

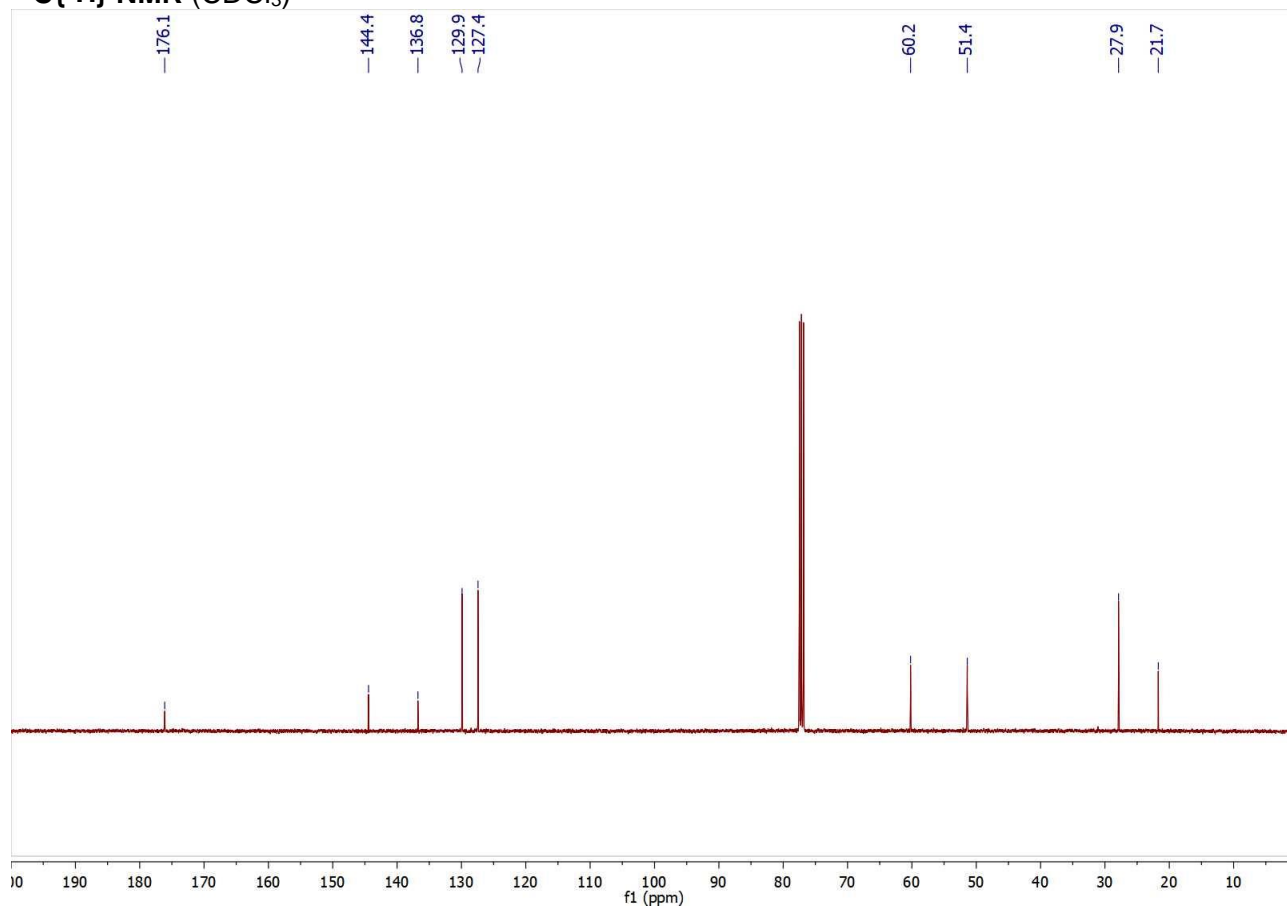

***N*-(2-((*tert*-Butyldiphenylsilyl)oxy)-1-(2,5-dioxopyrrolidin-1-yl)ethyl)-4-methylbencensulfonamide (2m)**

**<sup>1</sup>H NMR (CDCl<sub>3</sub>)**

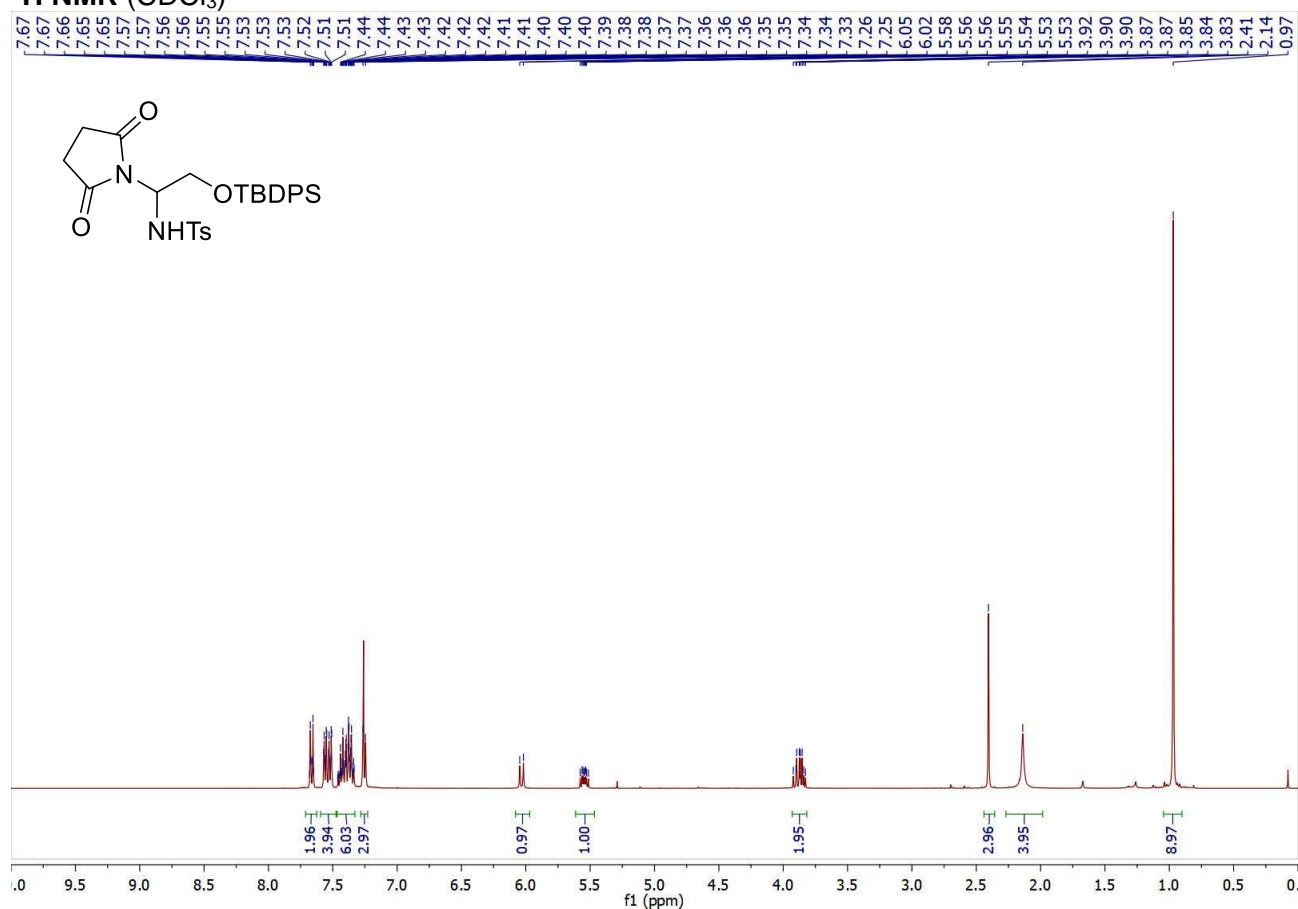

**<sup>13</sup>C{<sup>1</sup>H} NMR (CDCl<sub>3</sub>)**

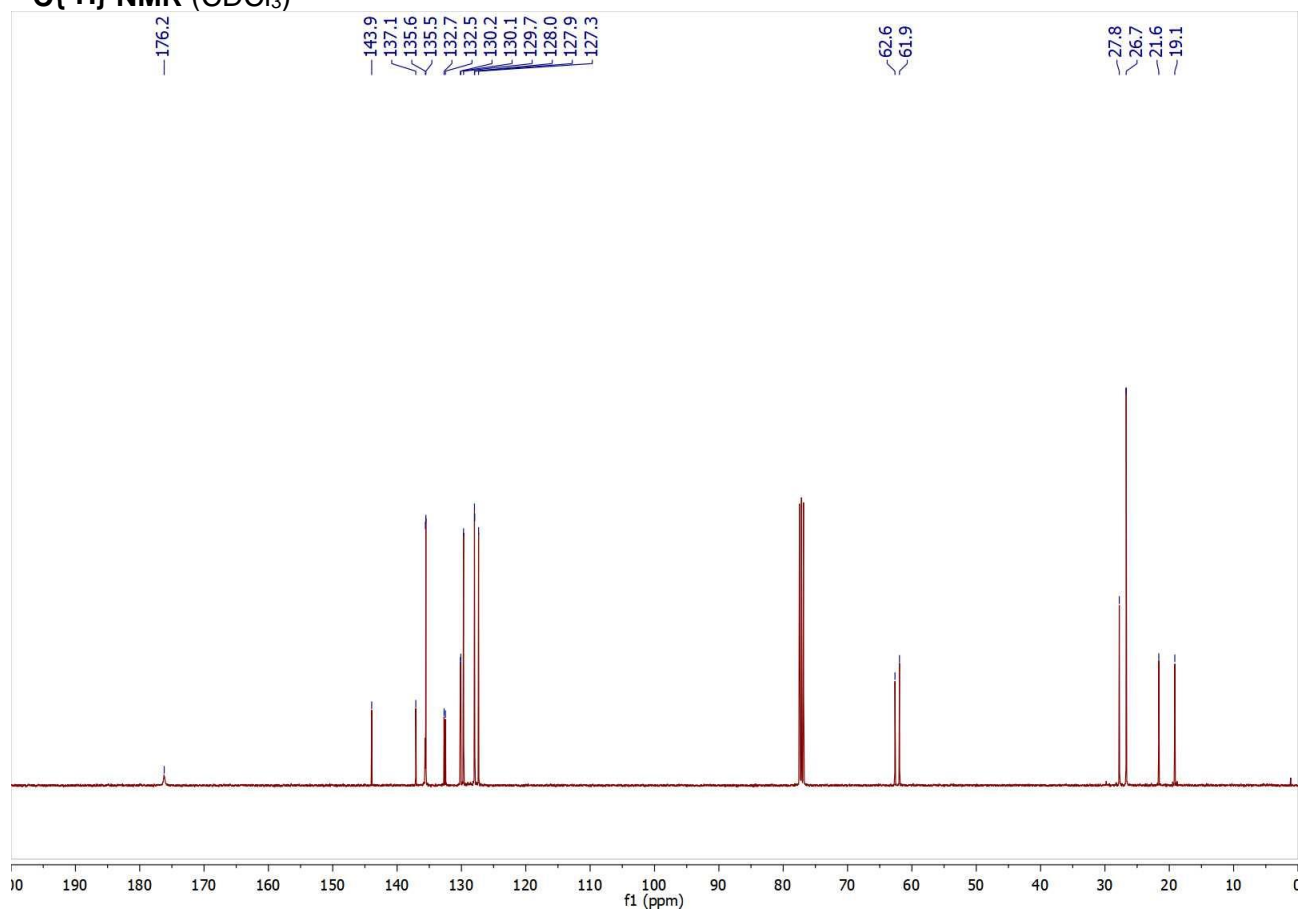

**Ethyl 2-(2,5-dioxopyrrolidin-1-yl)-2-((4-methylphenyl)sulfonamido) acetate (2n)**

<sup>1</sup>H NMR (CDCl<sub>3</sub>)

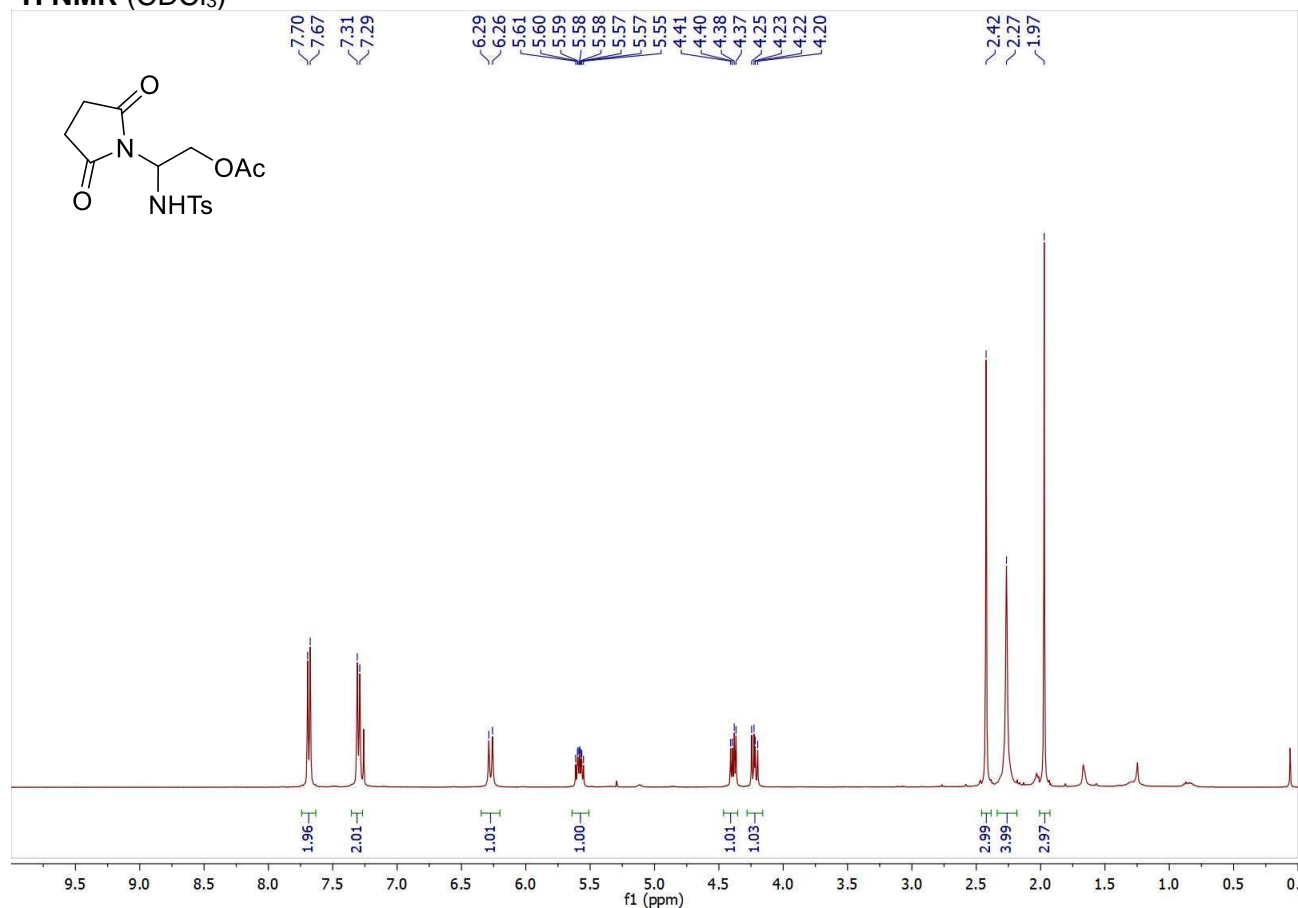

<sup>13</sup>C{<sup>1</sup>H} NMR (CDCl<sub>3</sub>)

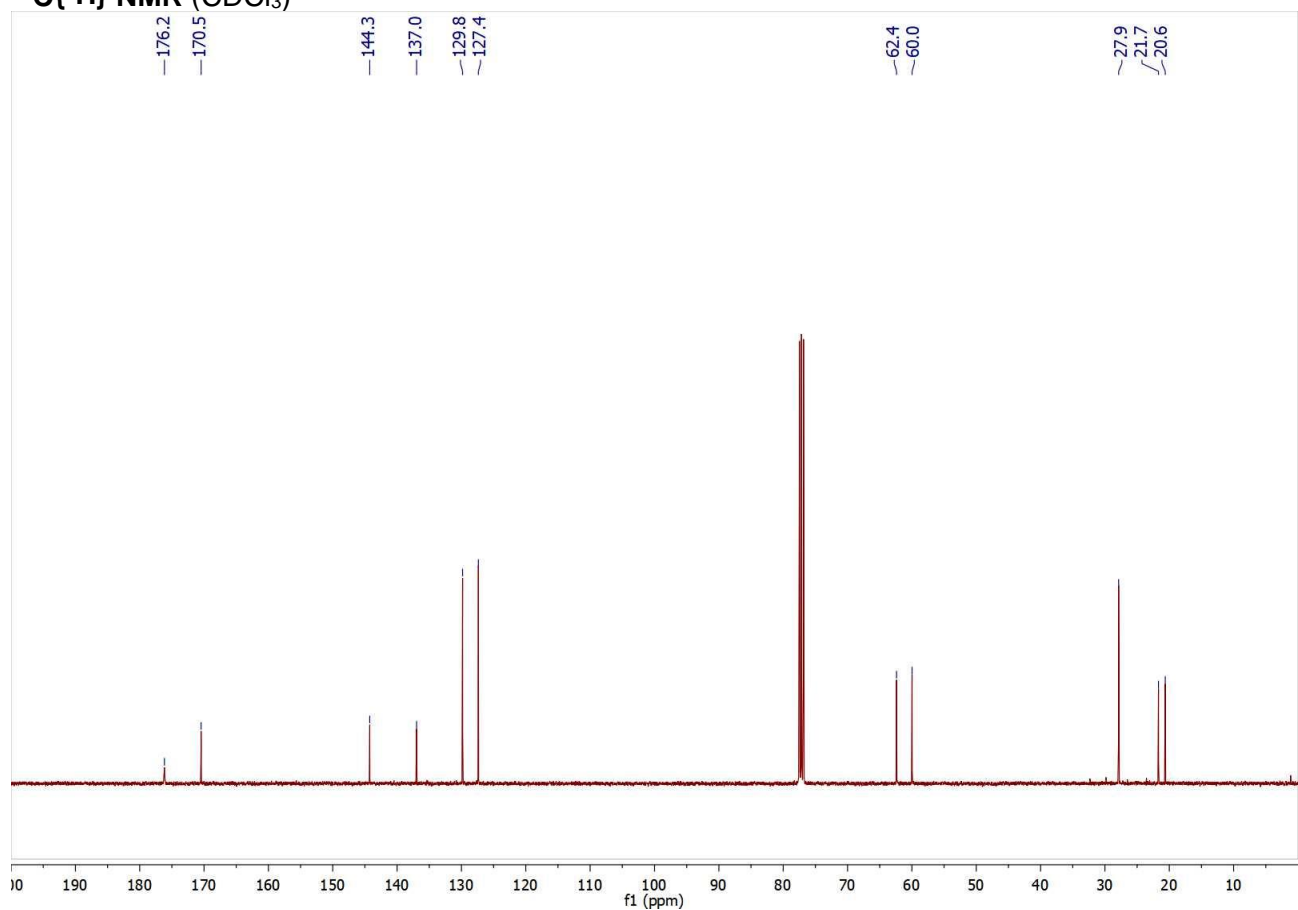

***N*-(2-Bromo-1-(2,5-dioxopyrrolidin-1-yl)ethyl)-4-methylbenzensulfonamide (2o)**

<sup>1</sup>H NMR (CDCl<sub>3</sub>)

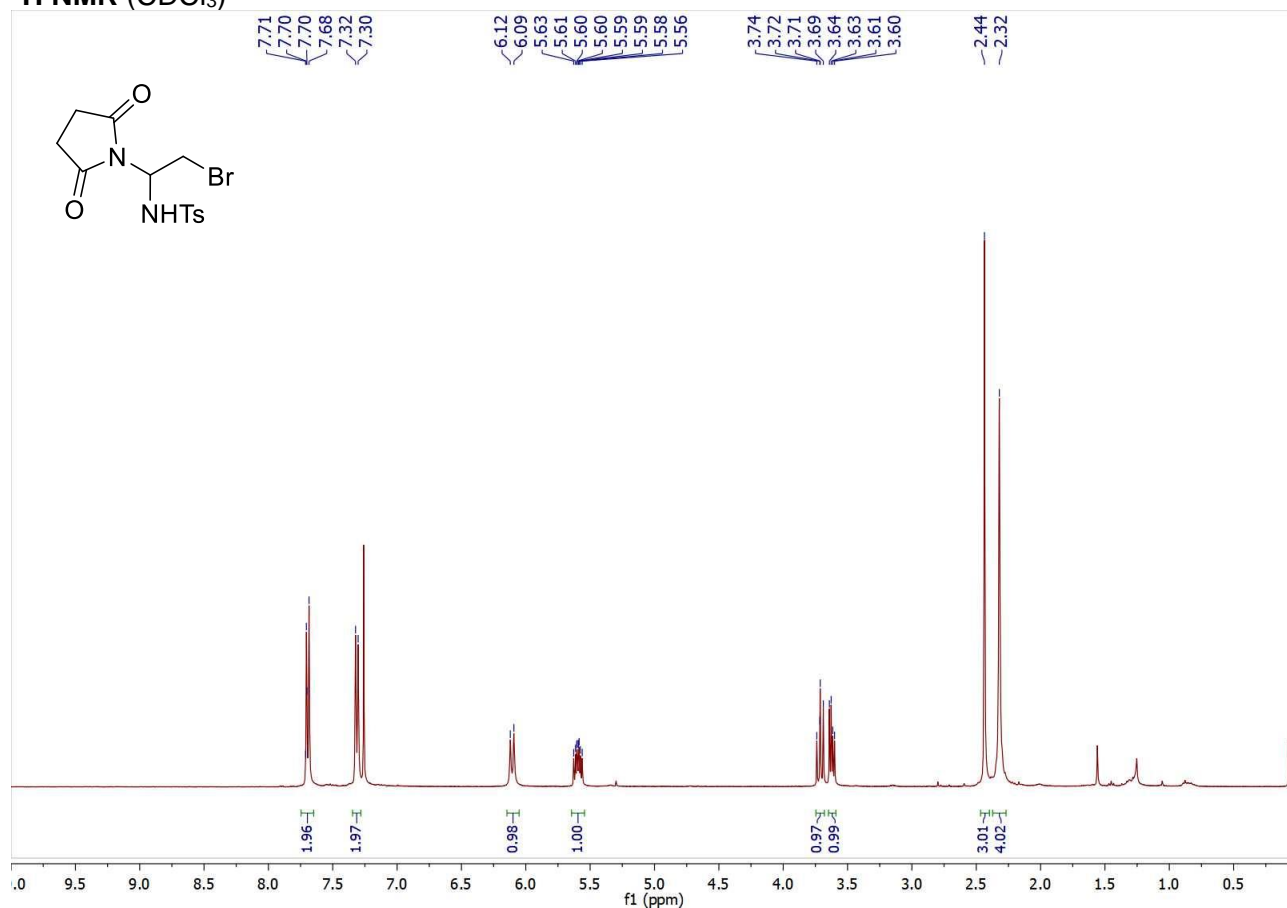

<sup>13</sup>C{<sup>1</sup>H} NMR (CDCl<sub>3</sub>)

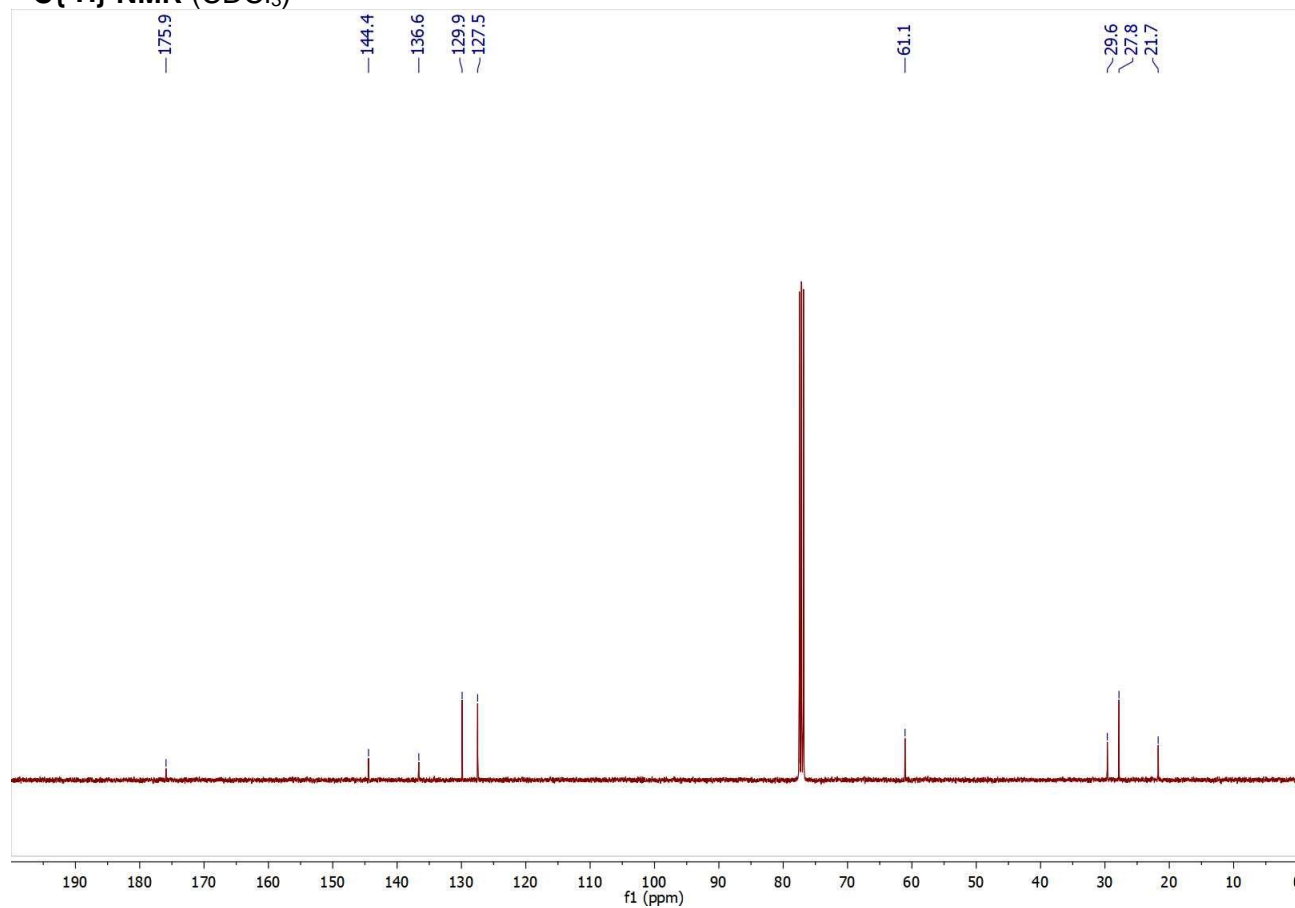

***N*-(2-(1,1-Dioxo-3-oxobenzo[*d*]isothiazol-2(3*H*)-yl)-1-(2,5-dioxopyrrolidin-1-yl)ethyl)-4-methylbenzenesulfonamide (2p)**

**<sup>1</sup>H NMR (CD<sub>3</sub>COCD<sub>3</sub>)**

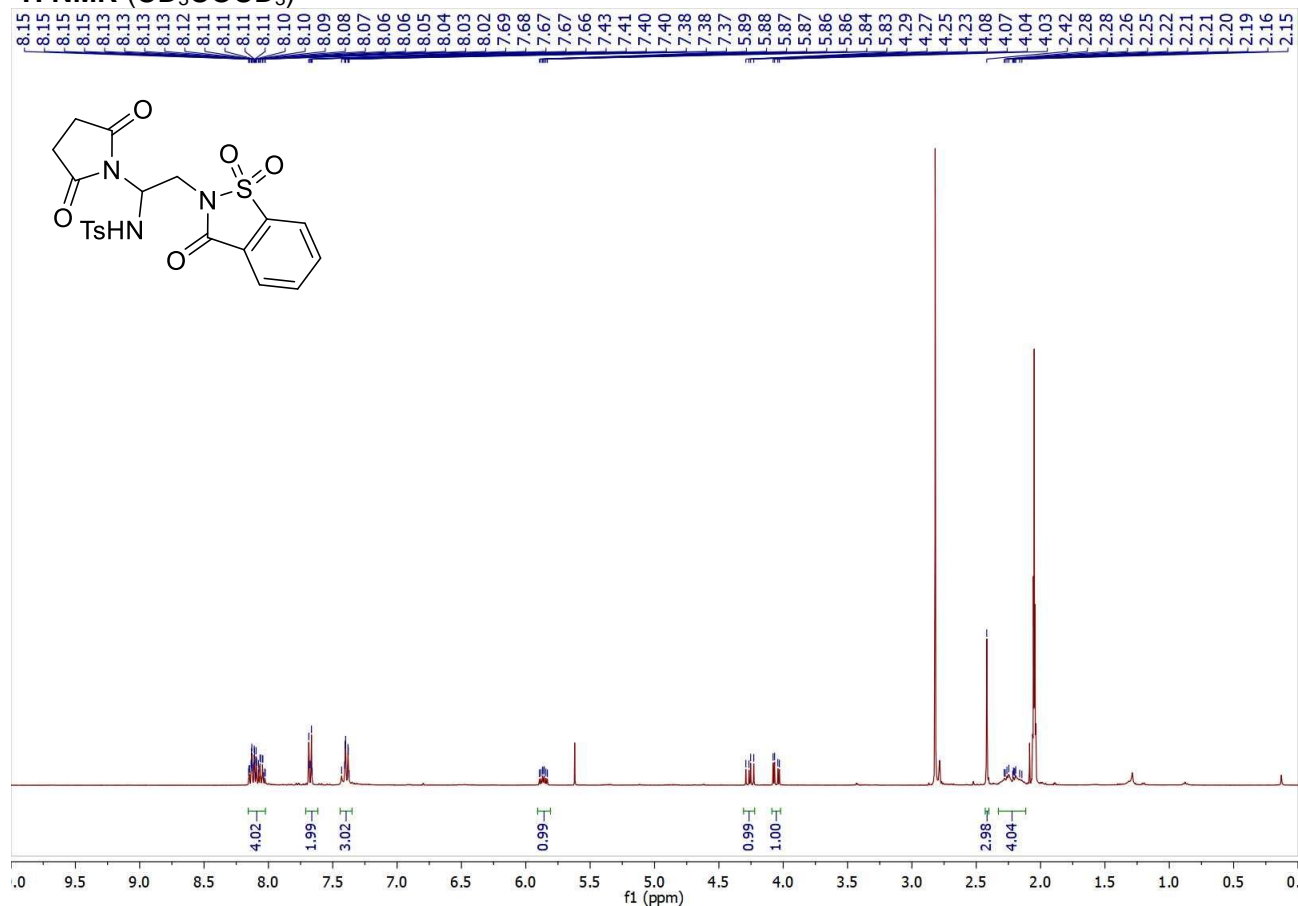

**<sup>13</sup>C{<sup>1</sup>H} NMR (CD<sub>3</sub>COCD<sub>3</sub>)**

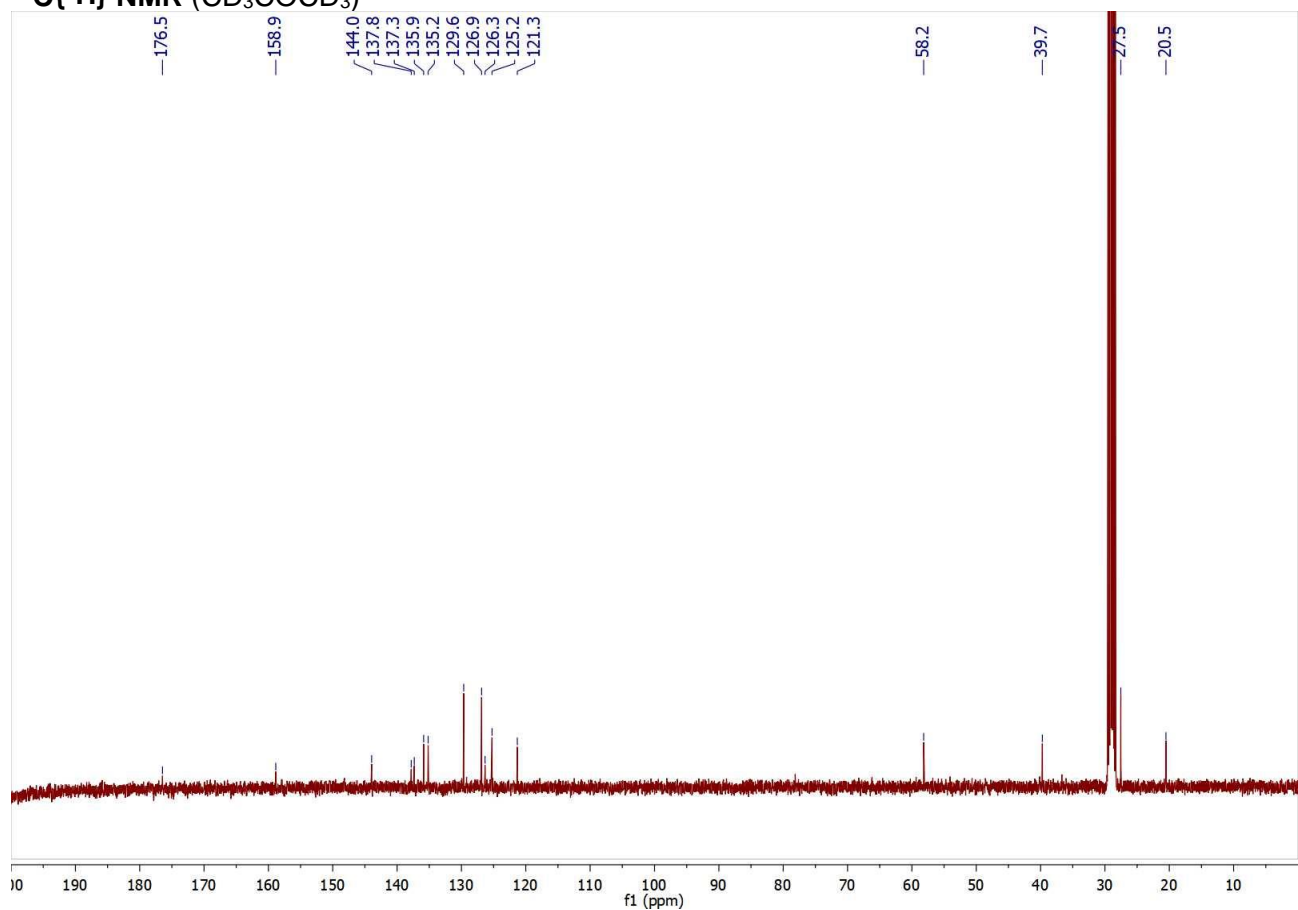



**2-(2,5-Dioxopyrrolidin-1-yl)-2-((4-methylphenyl)sulfonamido)ethyl (2S)-2-(4-isobutylphenyl)propanoate (2q)**

**<sup>1</sup>H NMR (CDCl<sub>3</sub>)**

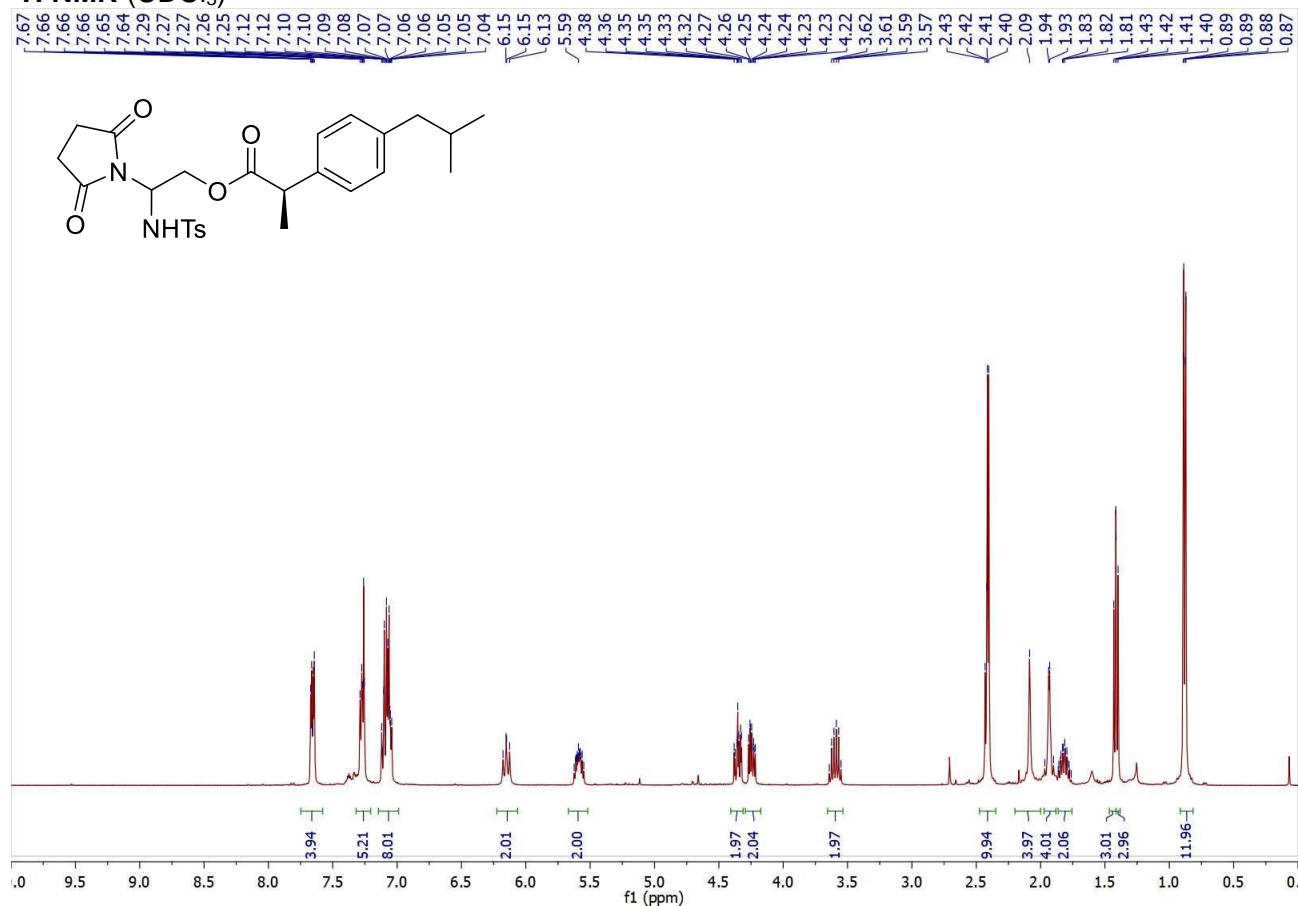

**<sup>13</sup>C{<sup>1</sup>H} NMR (CDCl<sub>3</sub>)**

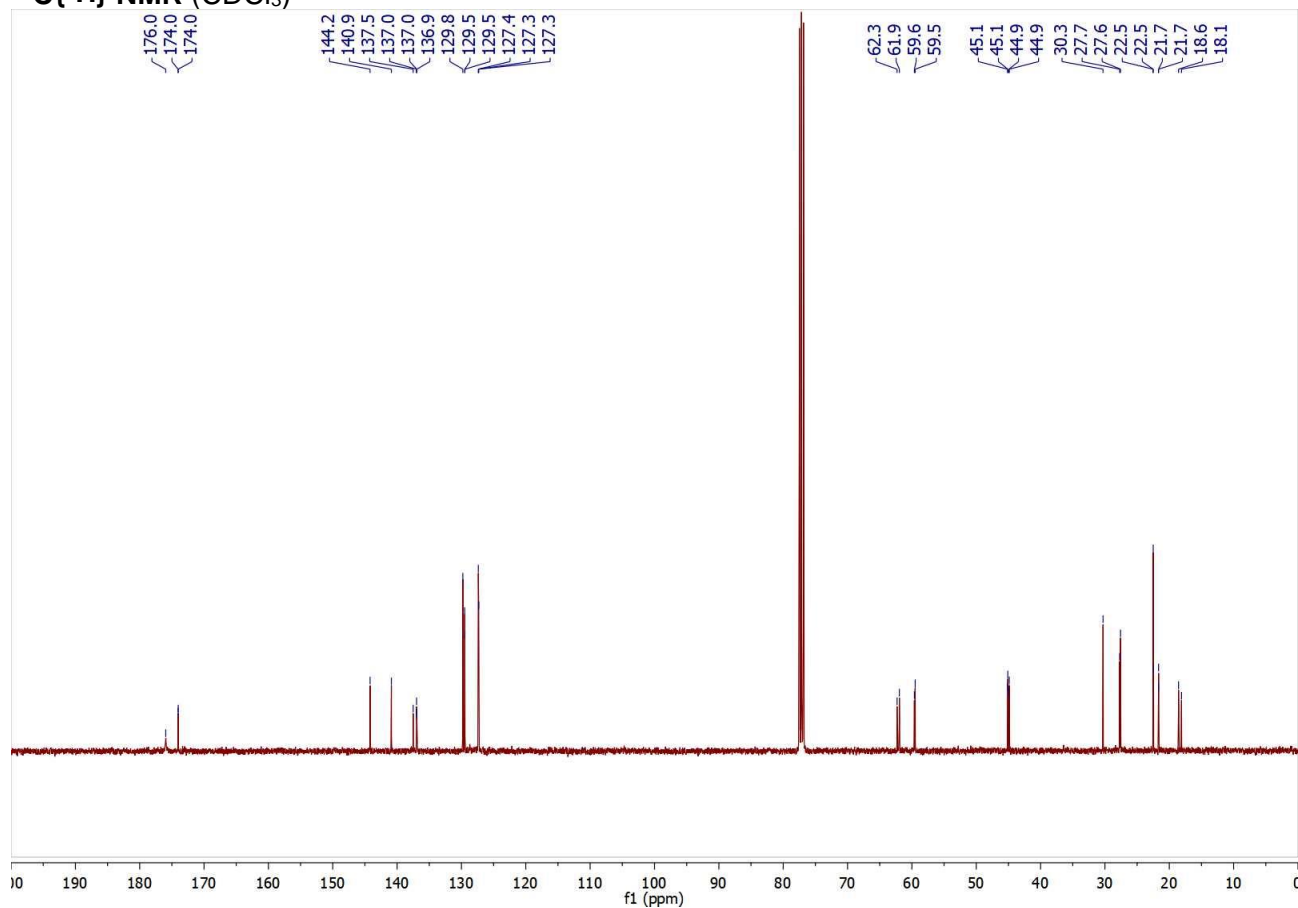

**Ethyl 2-(1,3-dioxoisindolin-2-yl)-2-((4methylphenyl)sulfonamido)acetate (2aa)**

**<sup>1</sup>H NMR (CDCl<sub>3</sub>)**

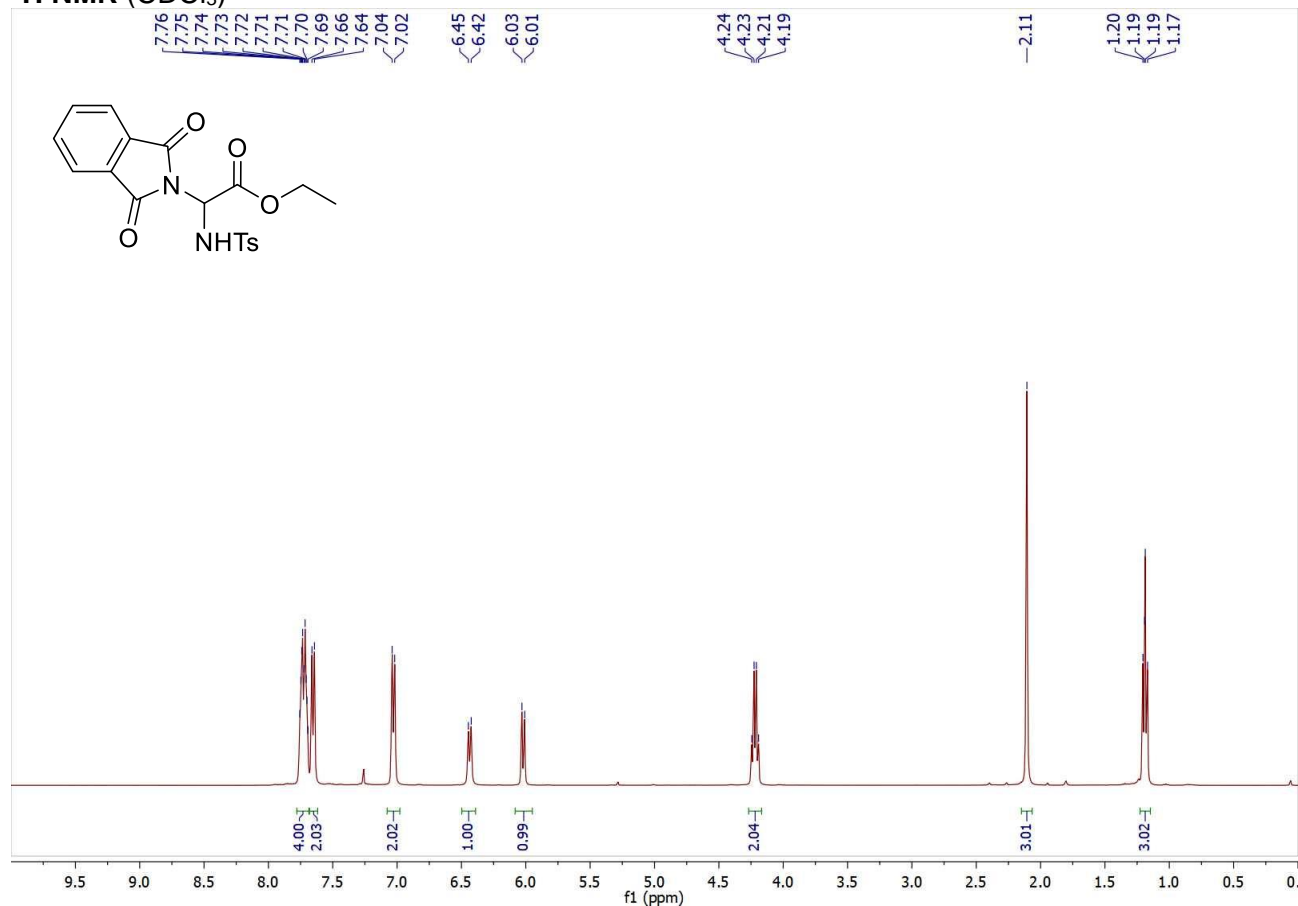

**<sup>13</sup>C{<sup>1</sup>H} NMR (CDCl<sub>3</sub>)**

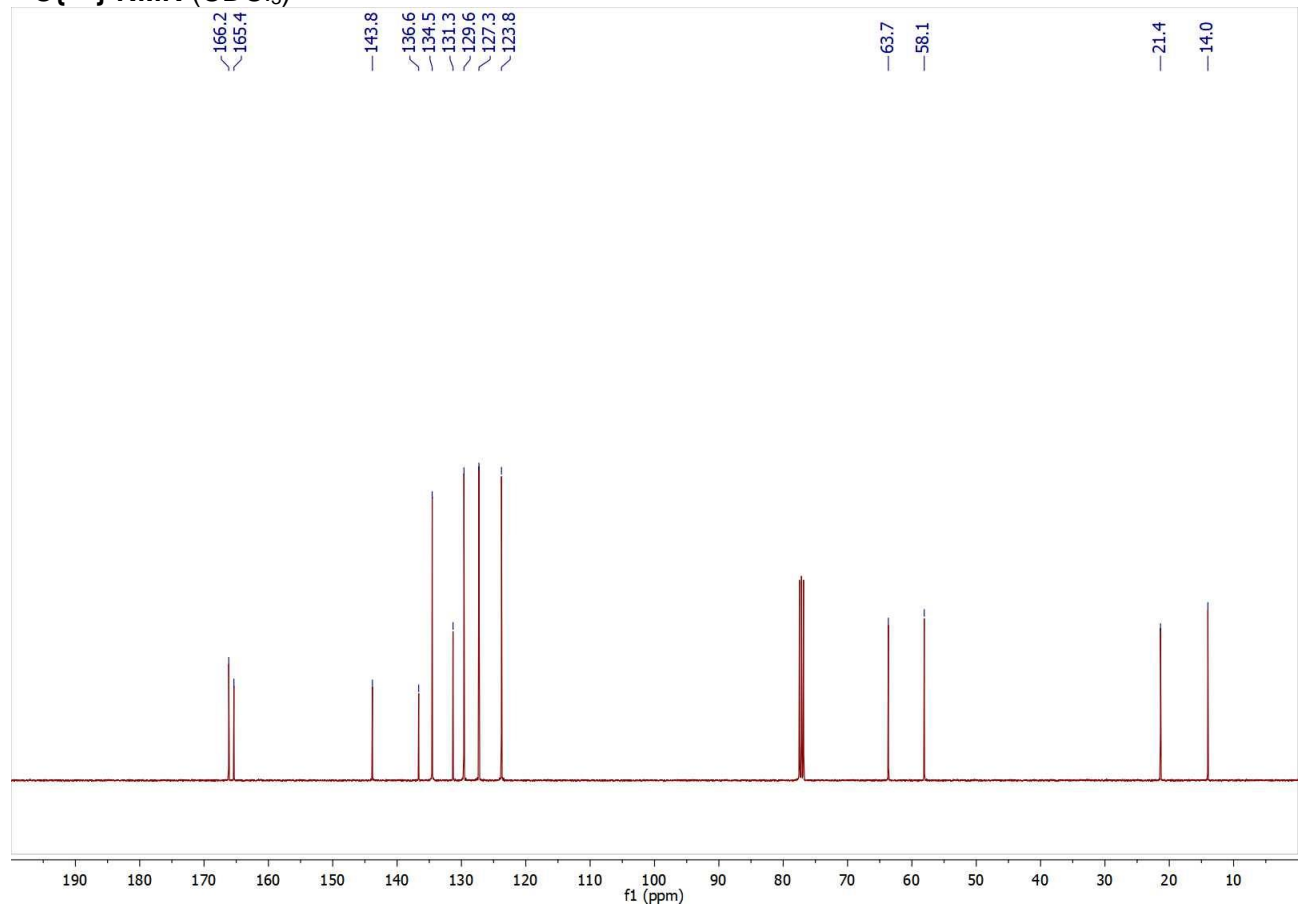

**Ethyl 2-(5-bromo-1,3-dioxisoindolin-2-yl)-2-((4-methylphenyl)sulfonamido)acetate (2ab)**

**$^1\text{H}$  NMR ( $\text{CDCl}_3$ )**

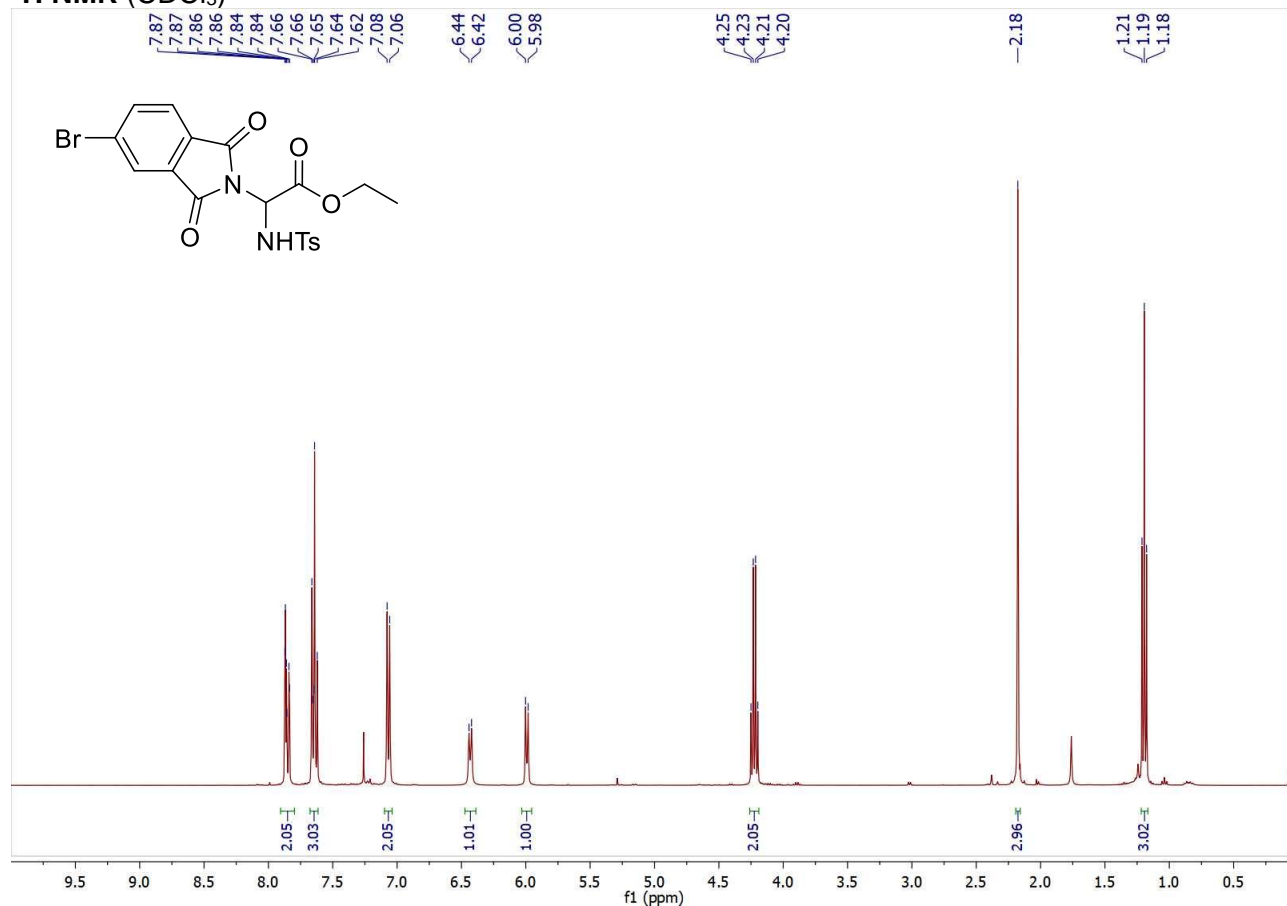

**$^{13}\text{C}\{^1\text{H}\}$  NMR ( $\text{CDCl}_3$ )**

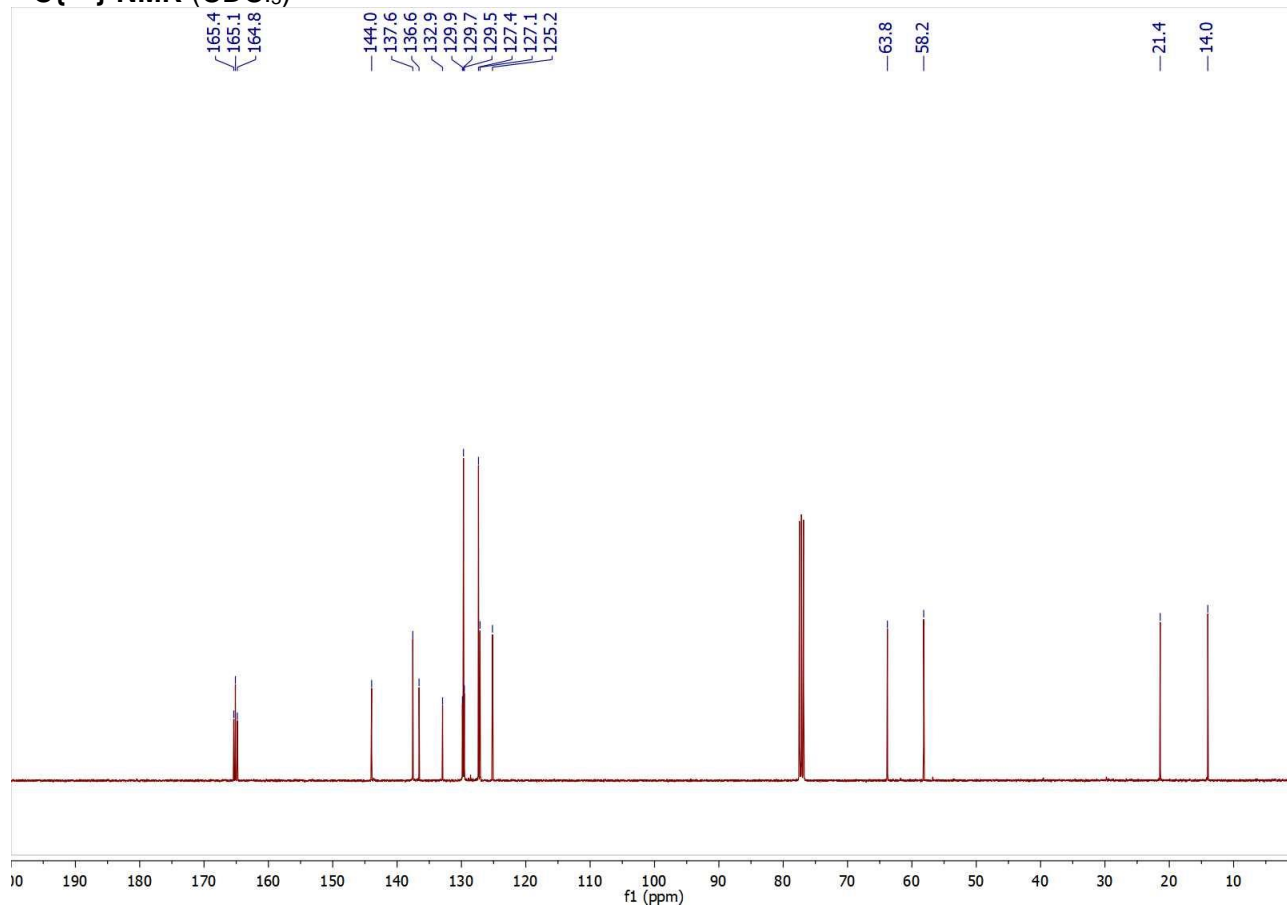

**Ethyl 2-(3-ethyl-3-methyl-2,5-dioxopyrrolidin-1-yl)-2-((4-methylphenyl)sulfonamido)acetate (2ac)**

**$^1\text{H}$  NMR ( $\text{CDCl}_3$ )**

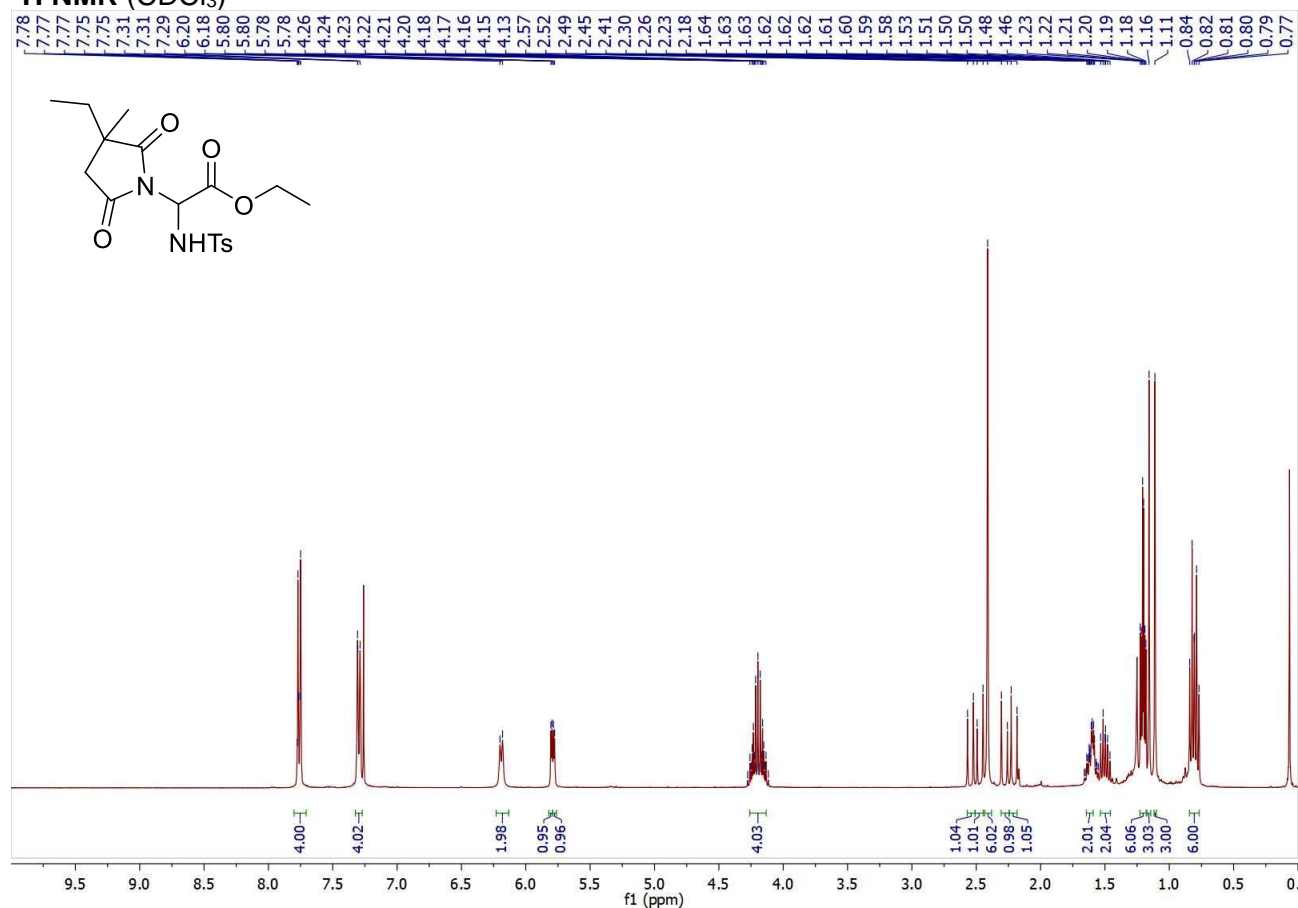

**$^{13}\text{C}\{^1\text{H}\}$  NMR ( $\text{CDCl}_3$ )**

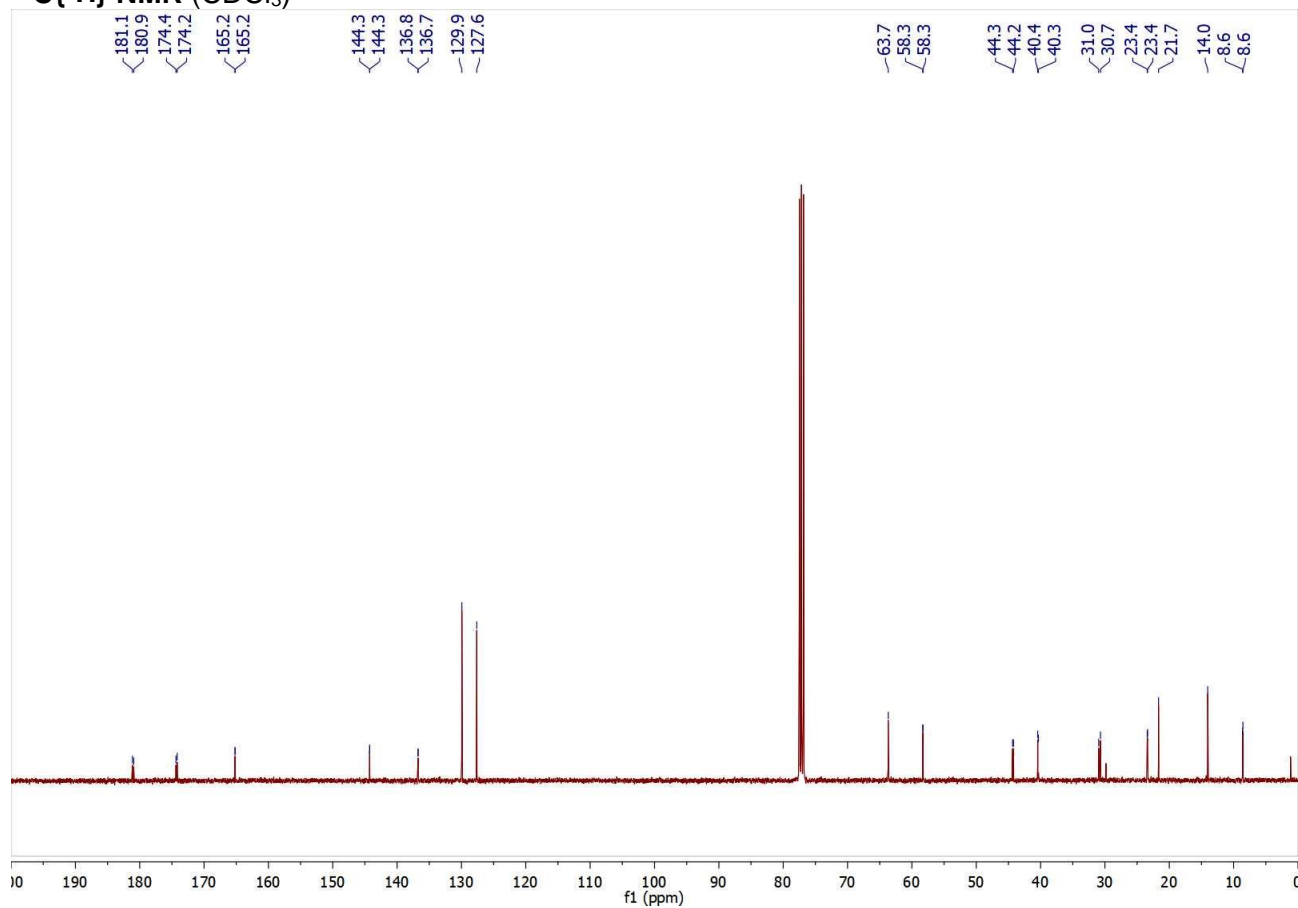

**Ethyl 2-(5,5-dimethyl-2,4-dioxooxazolidin-3-yl)-2-((4-methylphenyl)sulfonamido)acetate (2ad)**

<sup>1</sup>H NMR (CDCl<sub>3</sub>)

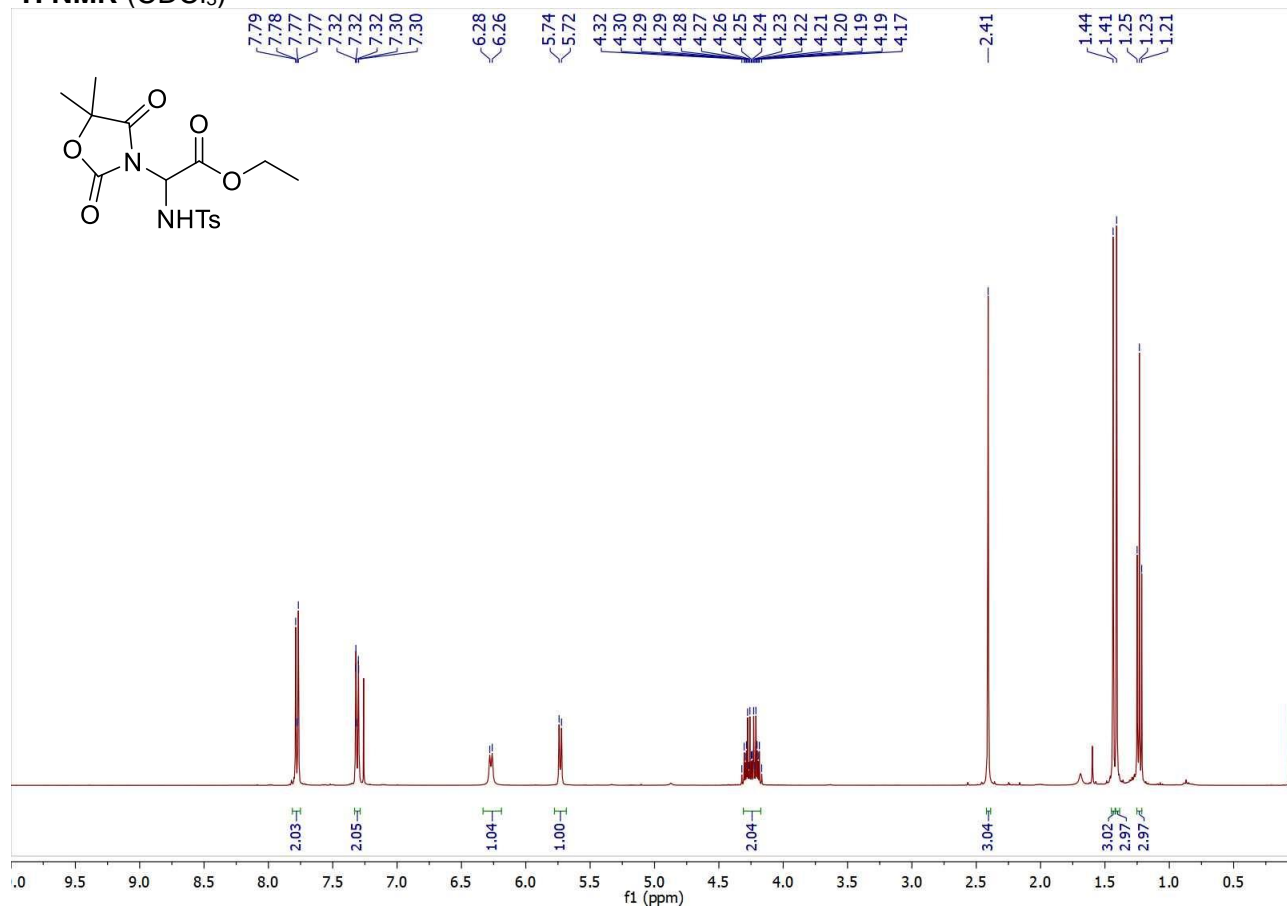

<sup>13</sup>C{<sup>1</sup>H} NMR (CDCl<sub>3</sub>)

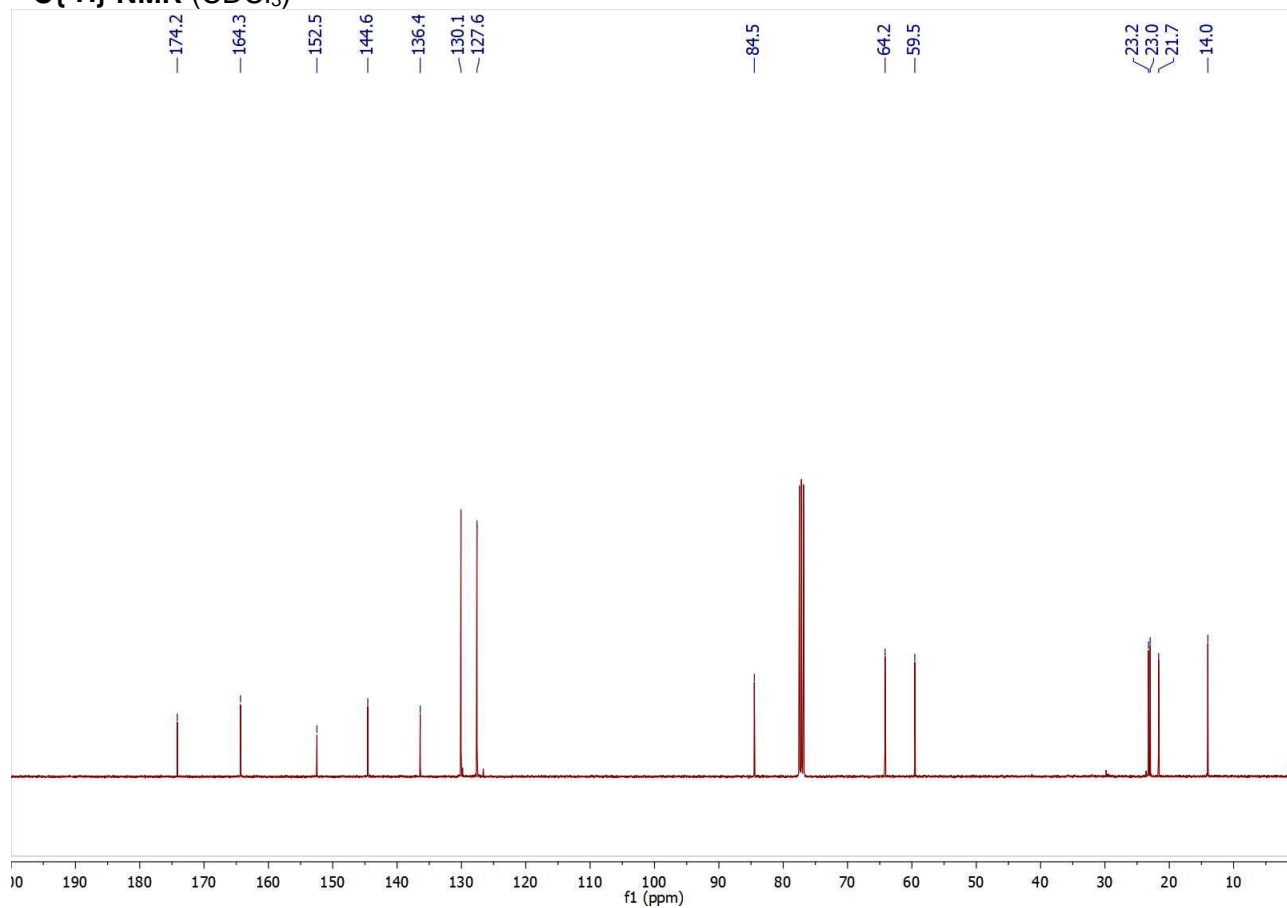

**Ethyl 2-(4,4-dimethyl-2,5-dioximidazolidin-1-yl)-2-((4-methylphenyl)sulfonamido)acetate (2ae)**

**<sup>1</sup>H NMR (CD<sub>3</sub>COCD<sub>3</sub>)**

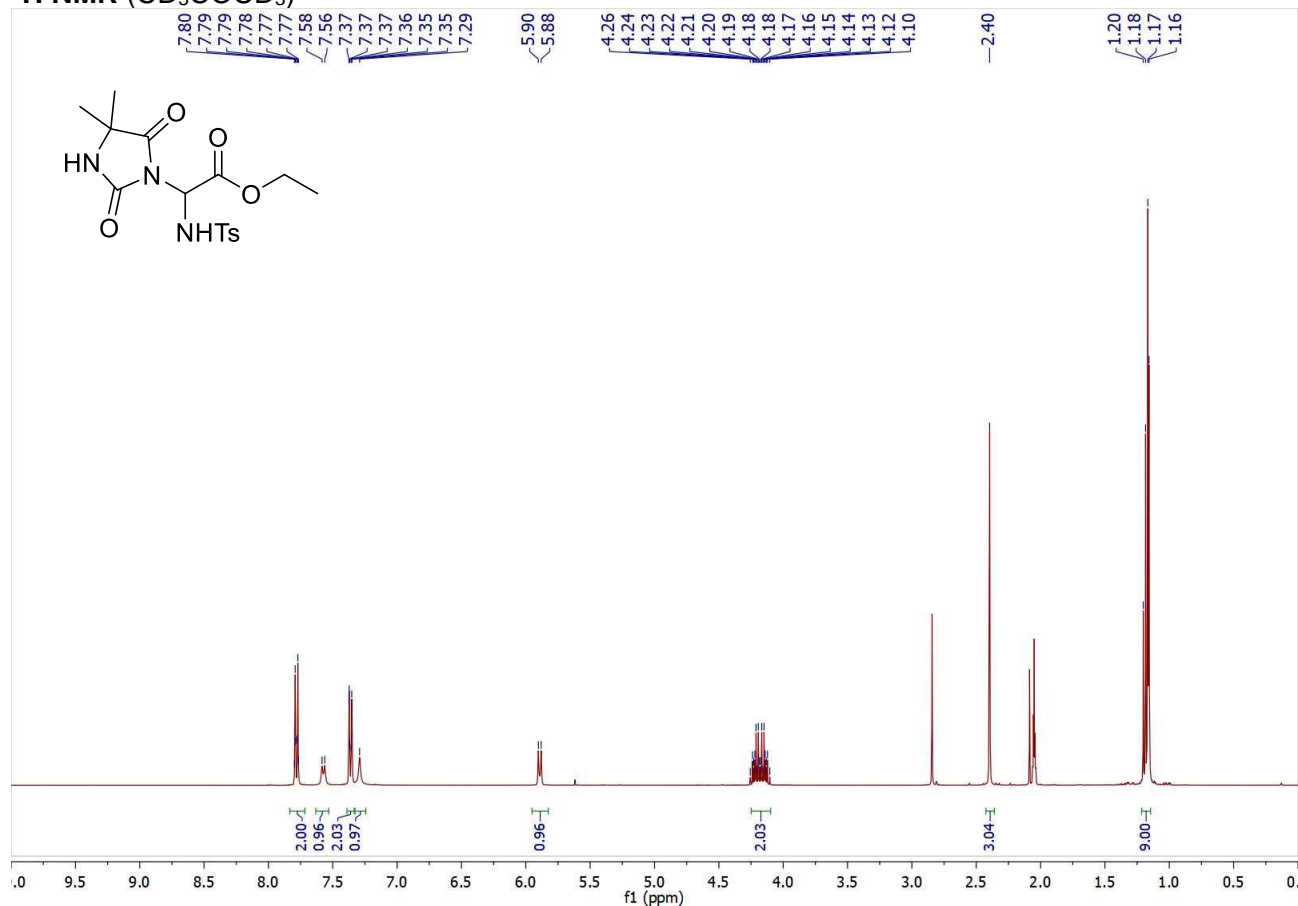

**<sup>13</sup>C{<sup>1</sup>H} NMR (CD<sub>3</sub>COCD<sub>3</sub>)**

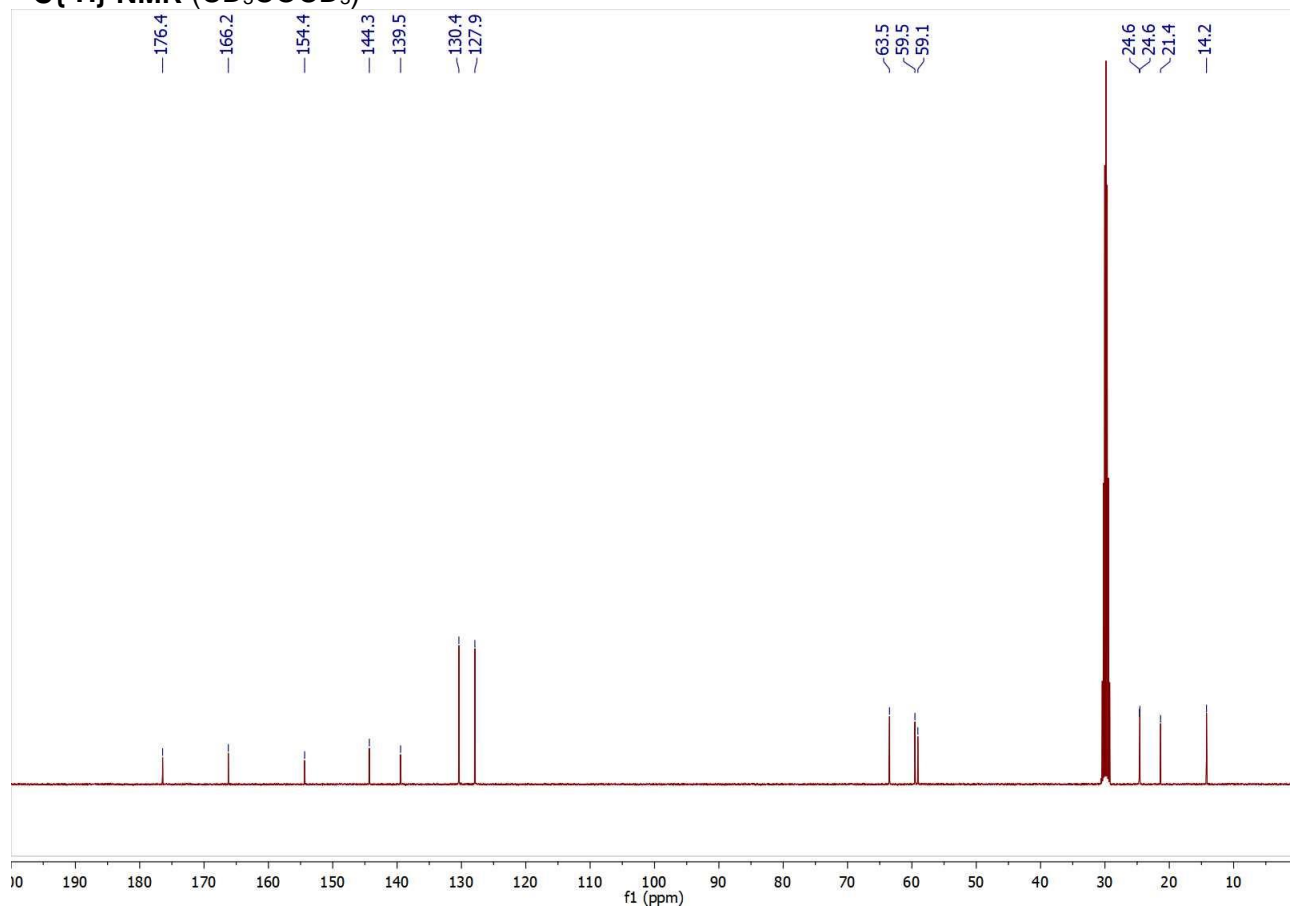

**Ethyl 2-(2,5-dioxo-4,4-diphenylimidazolidin-1-yl)-2-((4-methylphenyl)sulfonamido)acetate (2af)**

**<sup>1</sup>H NMR (CDCl<sub>3</sub>)**

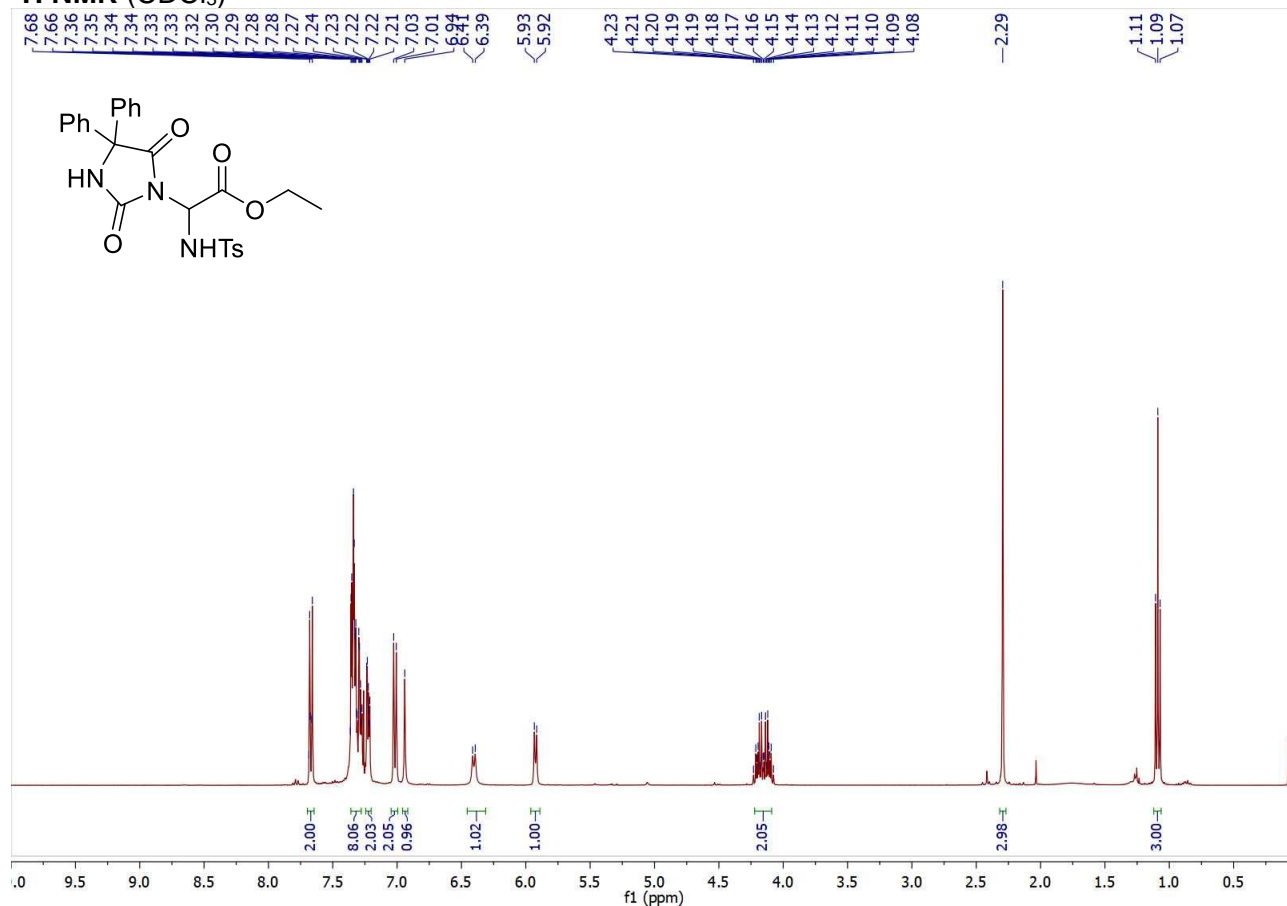

**<sup>13</sup>C{<sup>1</sup>H} NMR (CDCl<sub>3</sub>)**

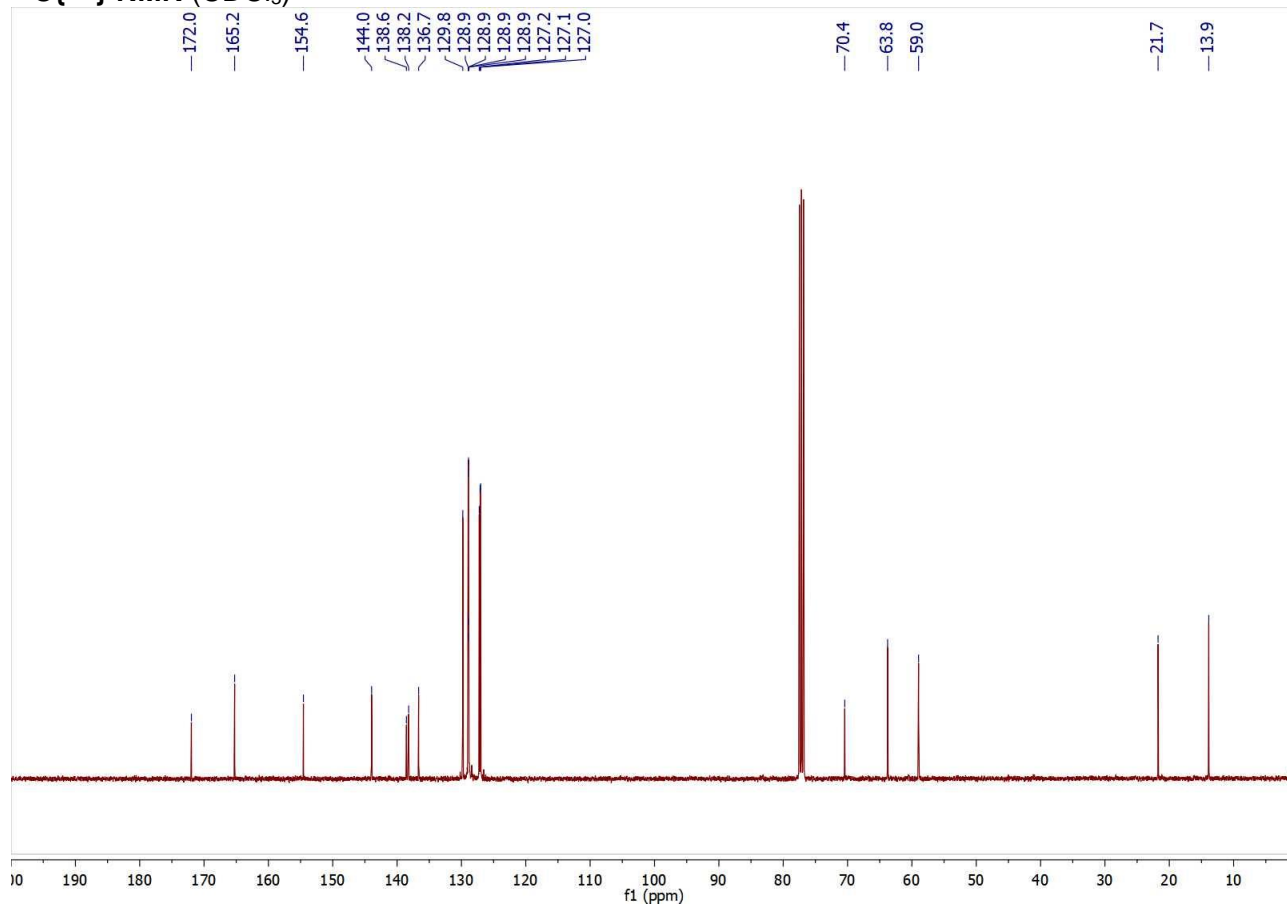

**Ethyl 2-(3-(1,3-dioxoisindolin-2-yl)-2,6-dioxopiperidin-1-yl)-2-((4-methylphenyl)sulfonamido)acetate (2ag)**  
<sup>1</sup>H NMR (CDCl<sub>3</sub>)

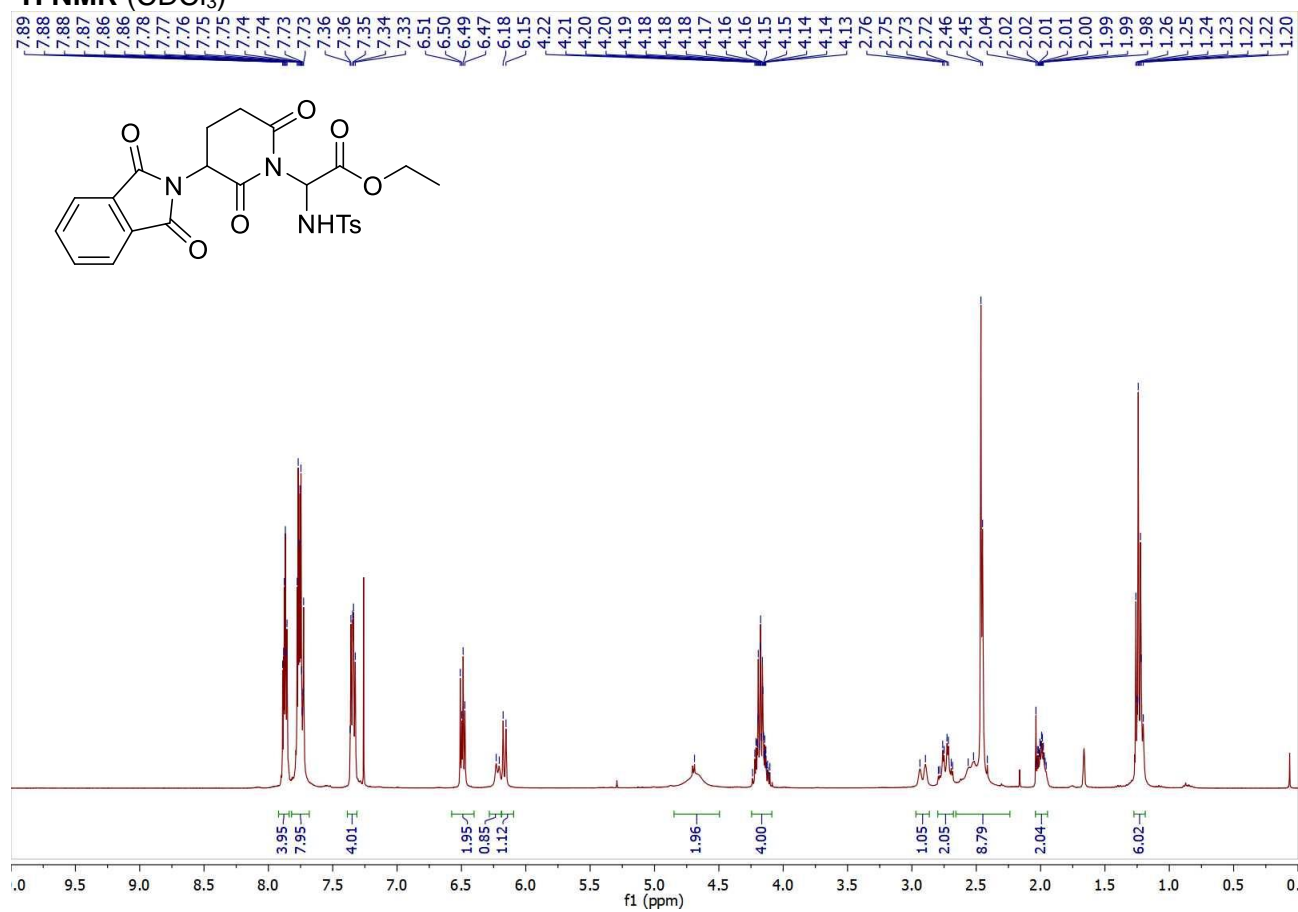

<sup>13</sup>C{<sup>1</sup>H} NMR (CDCl<sub>3</sub>)

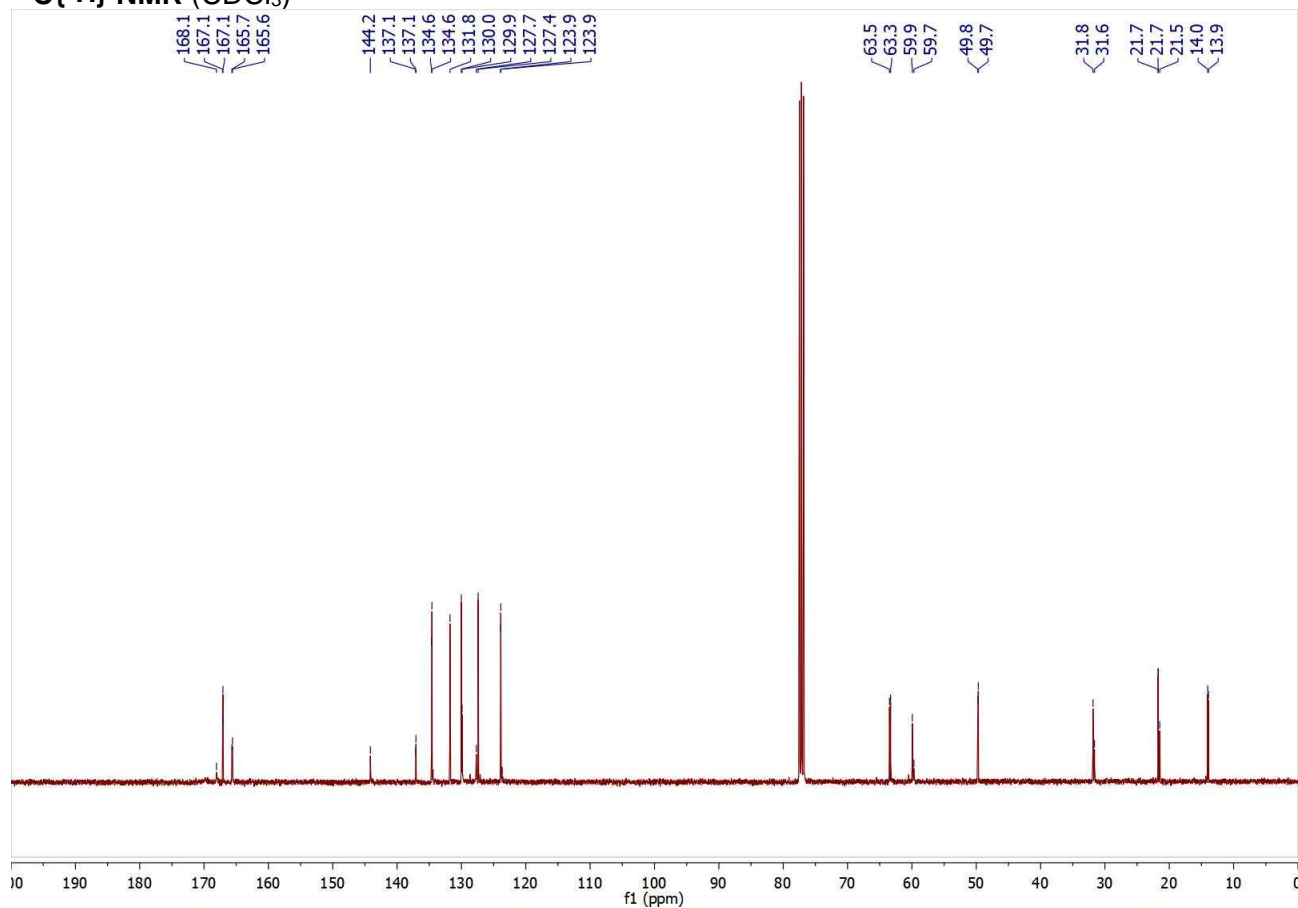



***N*-(1-(2,5-Dioxopyrrolidin-1-yl)-2-(phenylthio)ethyl)-4-methylbenzenesulfonamide (2ba)**

<sup>1</sup>H NMR (CDCl<sub>3</sub>)

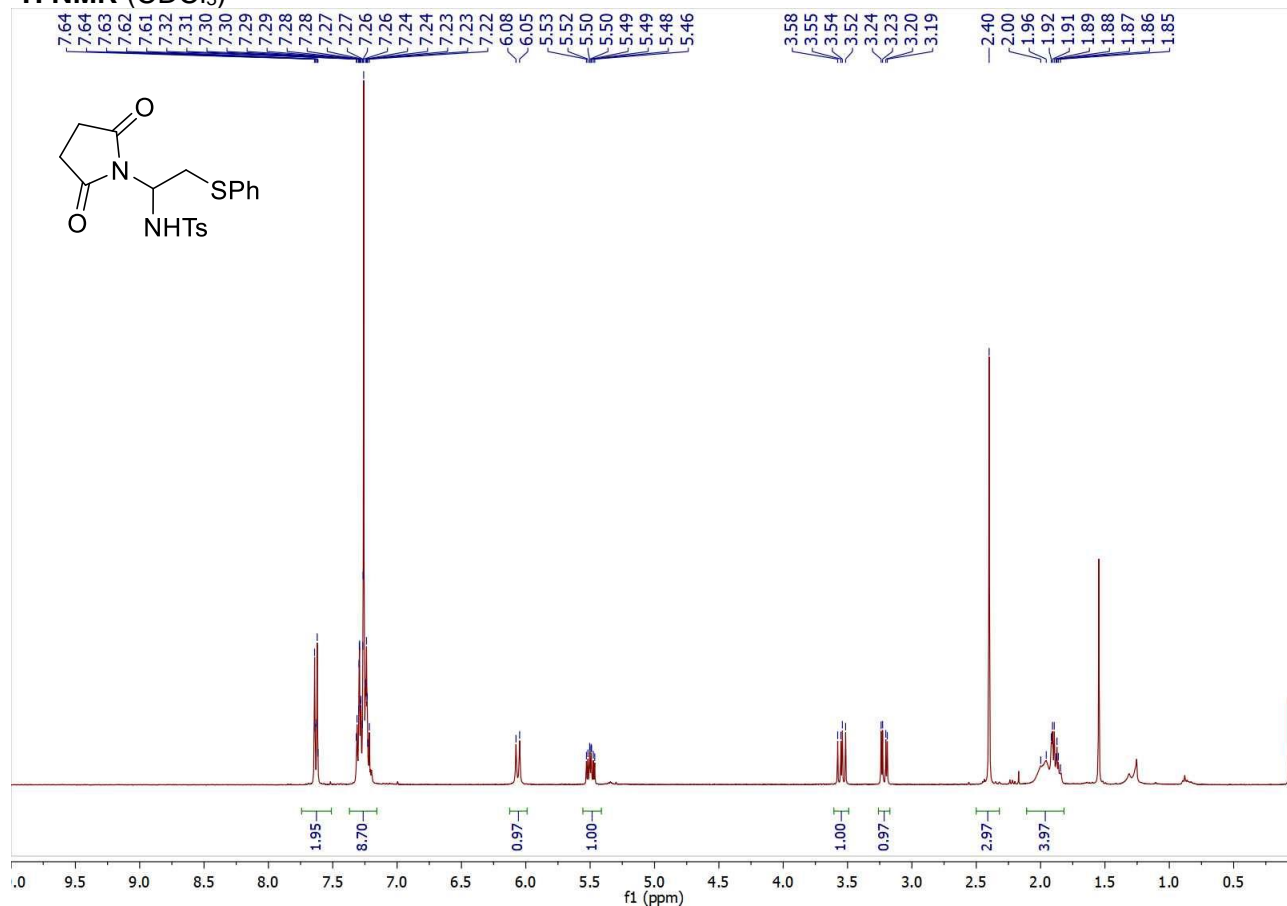

<sup>13</sup>C{<sup>1</sup>H} NMR (CDCl<sub>3</sub>)

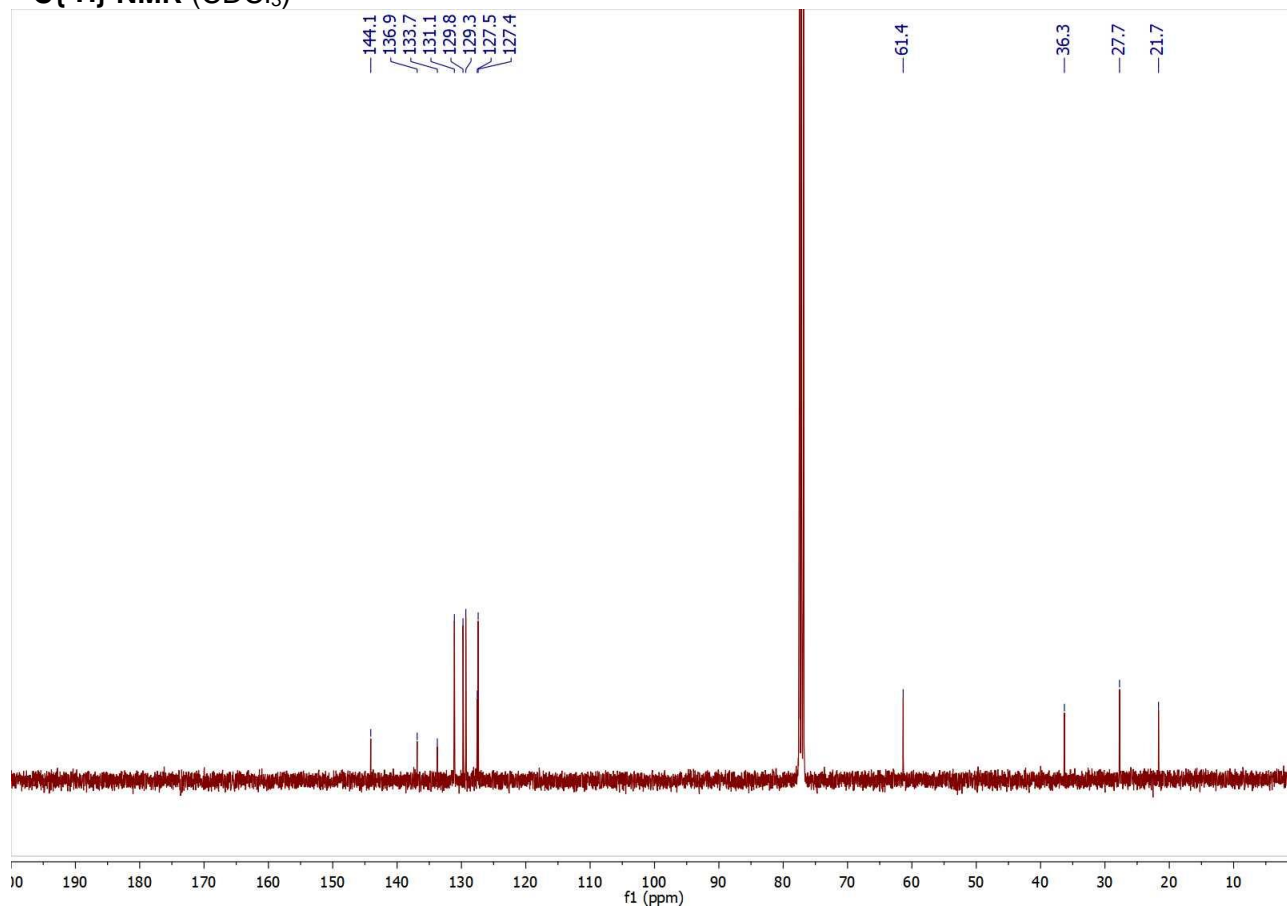

**Ethyl 2-(1-hydroxy-3-oxoisindolin-2-yl)-2-((4-methylphenyl)sulfonamido)acetate (2bb)**

**$^1\text{H}$  NMR ( $\text{CDCl}_3$ )**

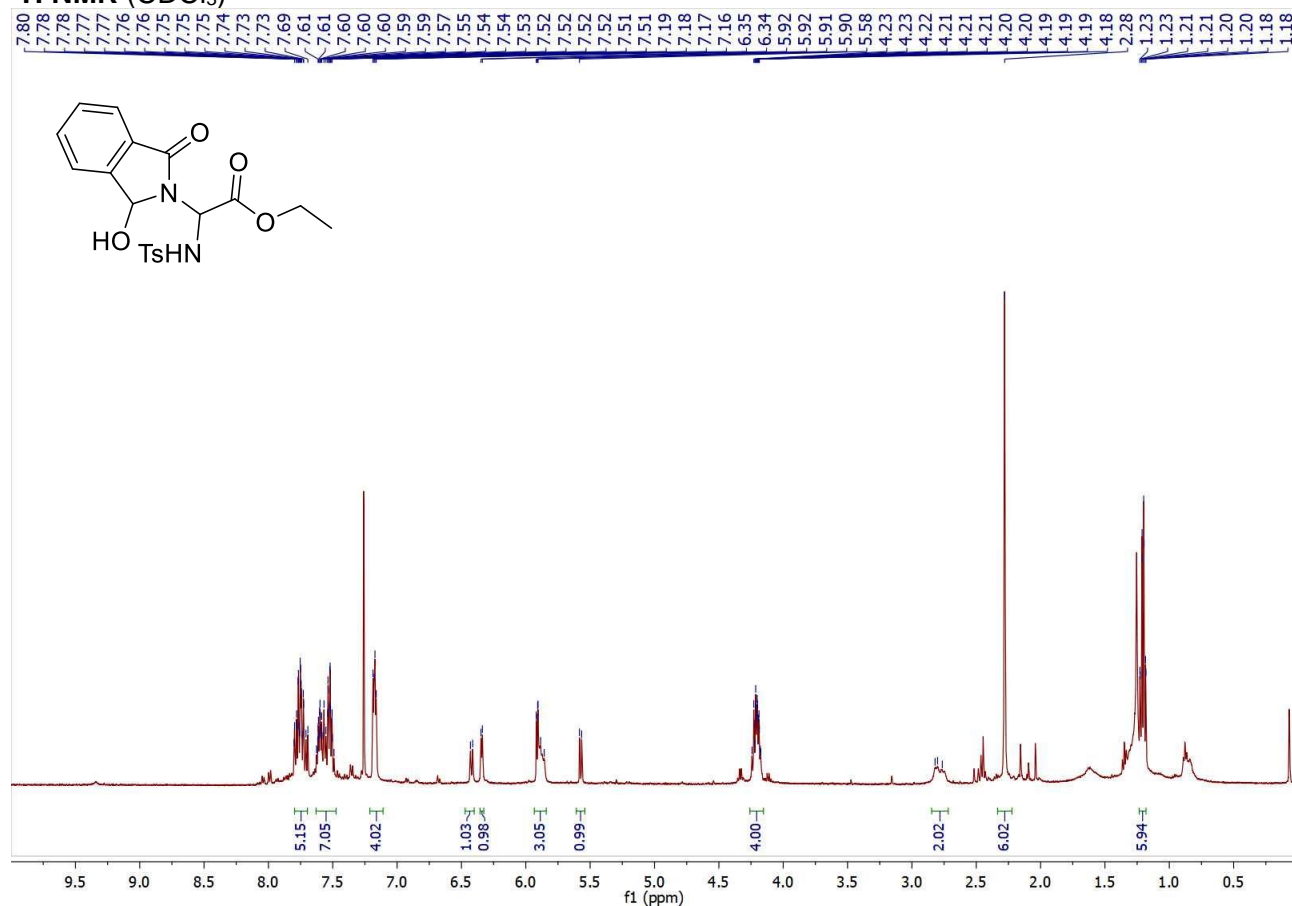

**$^{13}\text{C}\{^1\text{H}\}$  NMR ( $\text{CDCl}_3$ )**

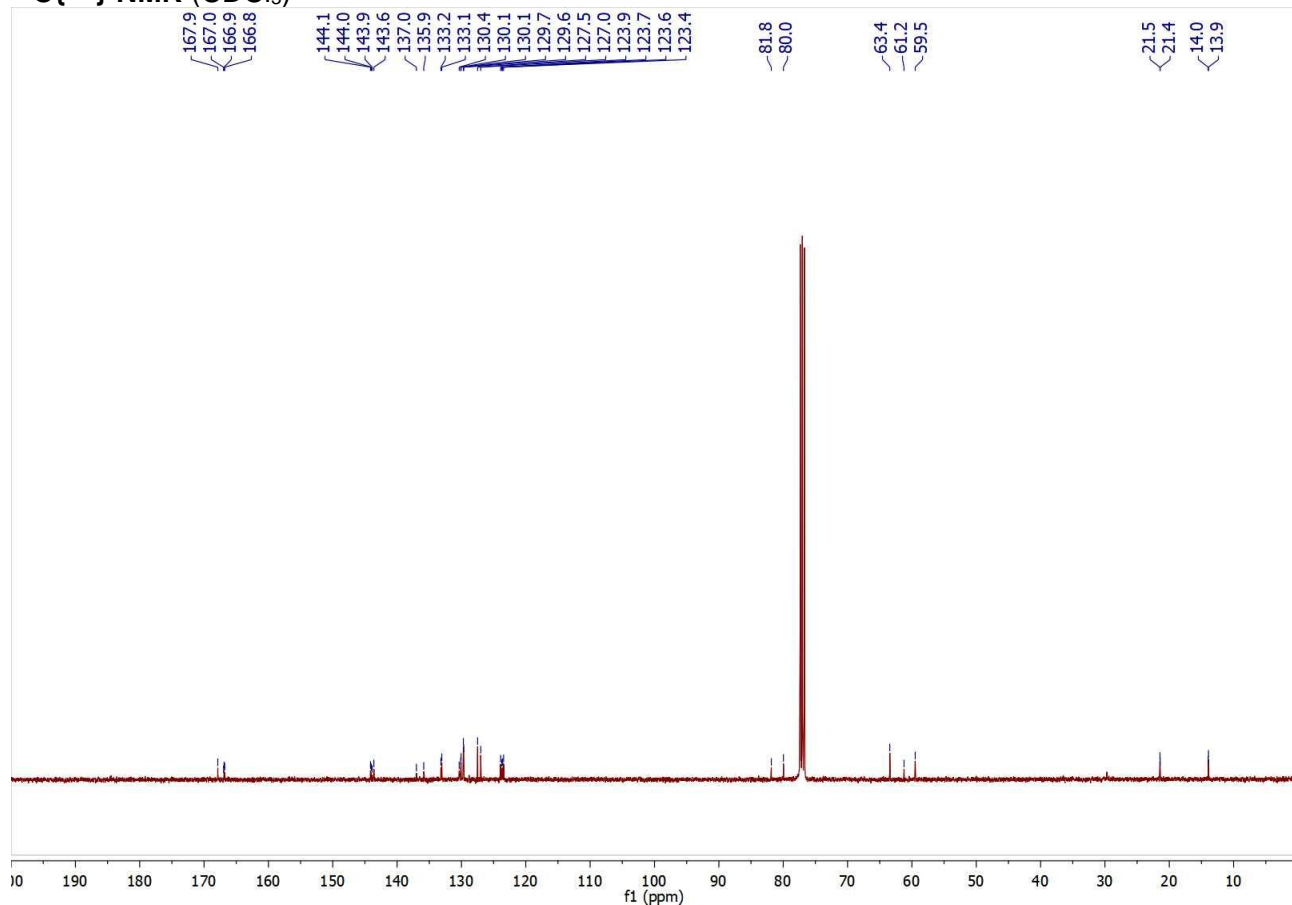

**Ethyl 2-(1-acetoxy-3-oxoisindolin-2-yl)-2-((4-methylphenyl)sulfonamido)acetate (2bc)**

**<sup>1</sup>H NMR (CDCl<sub>3</sub>)**

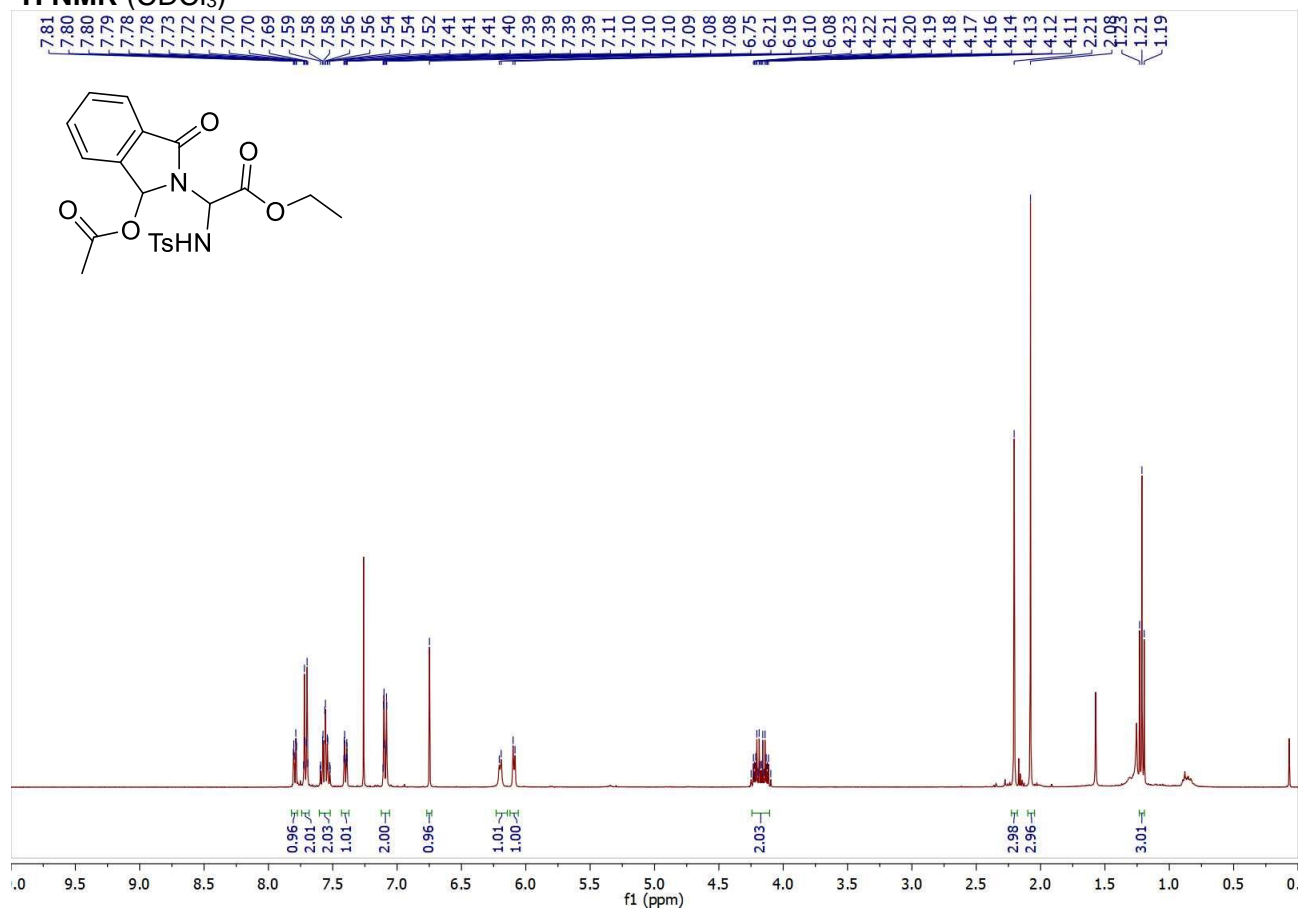

**<sup>13</sup>C{<sup>1</sup>H} NMR (CDCl<sub>3</sub>)**

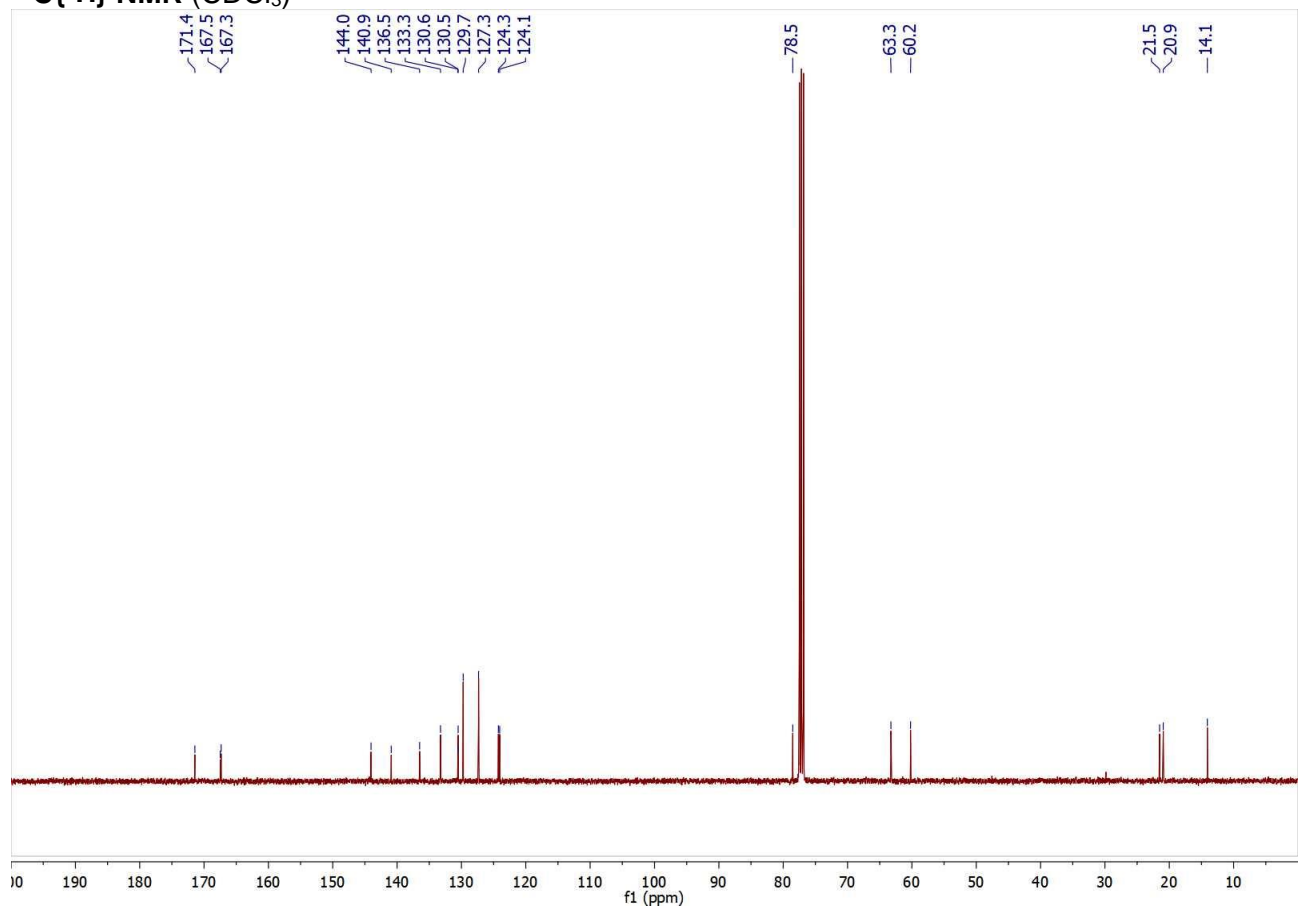

# 4-(Iodomethyl)phenyl-4-methylbenzenesulfonate (3)

$^1\text{H}$  NMR ( $\text{CDCl}_3$ )

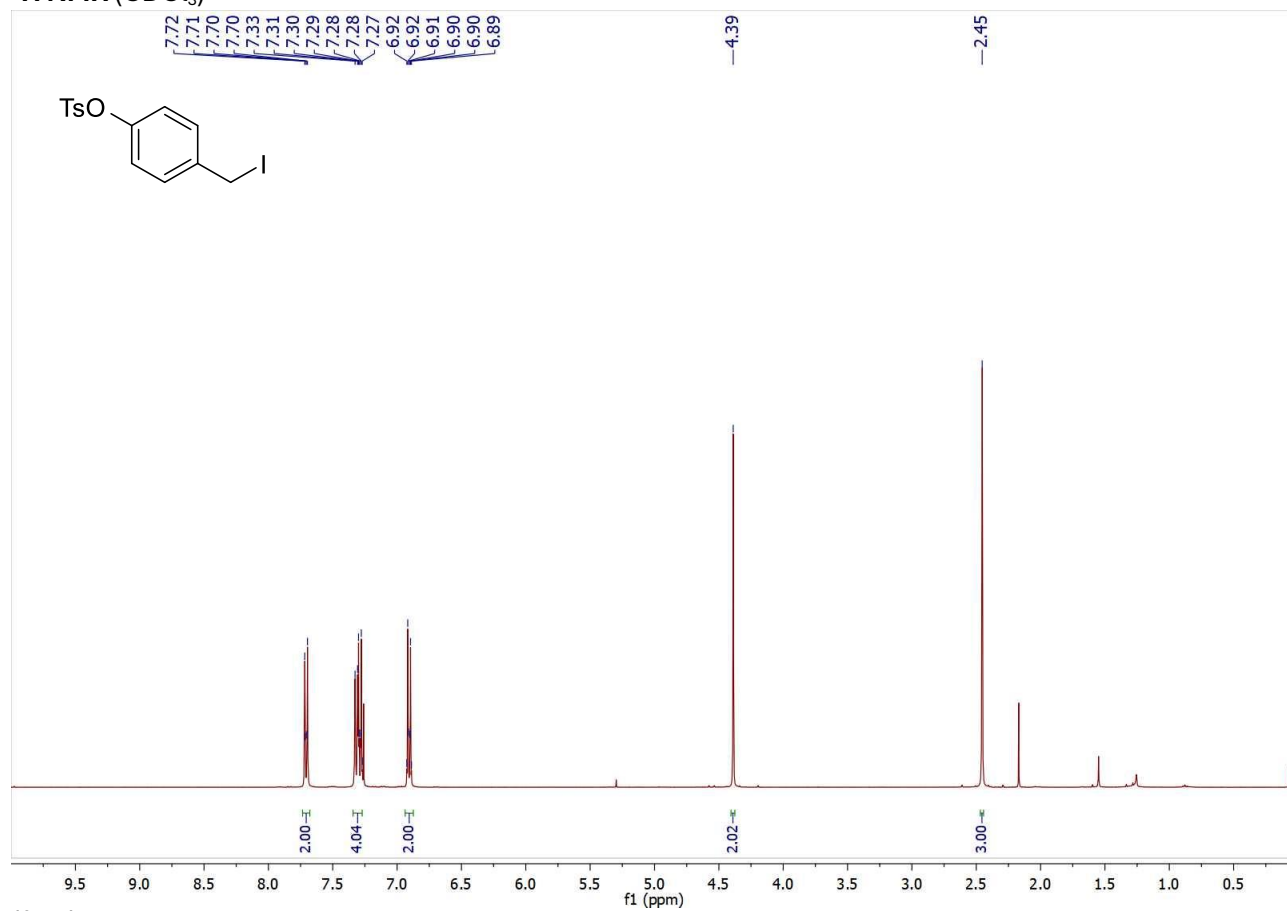

$^{13}\text{C}\{^1\text{H}\}$  NMR ( $\text{CDCl}_3$ )

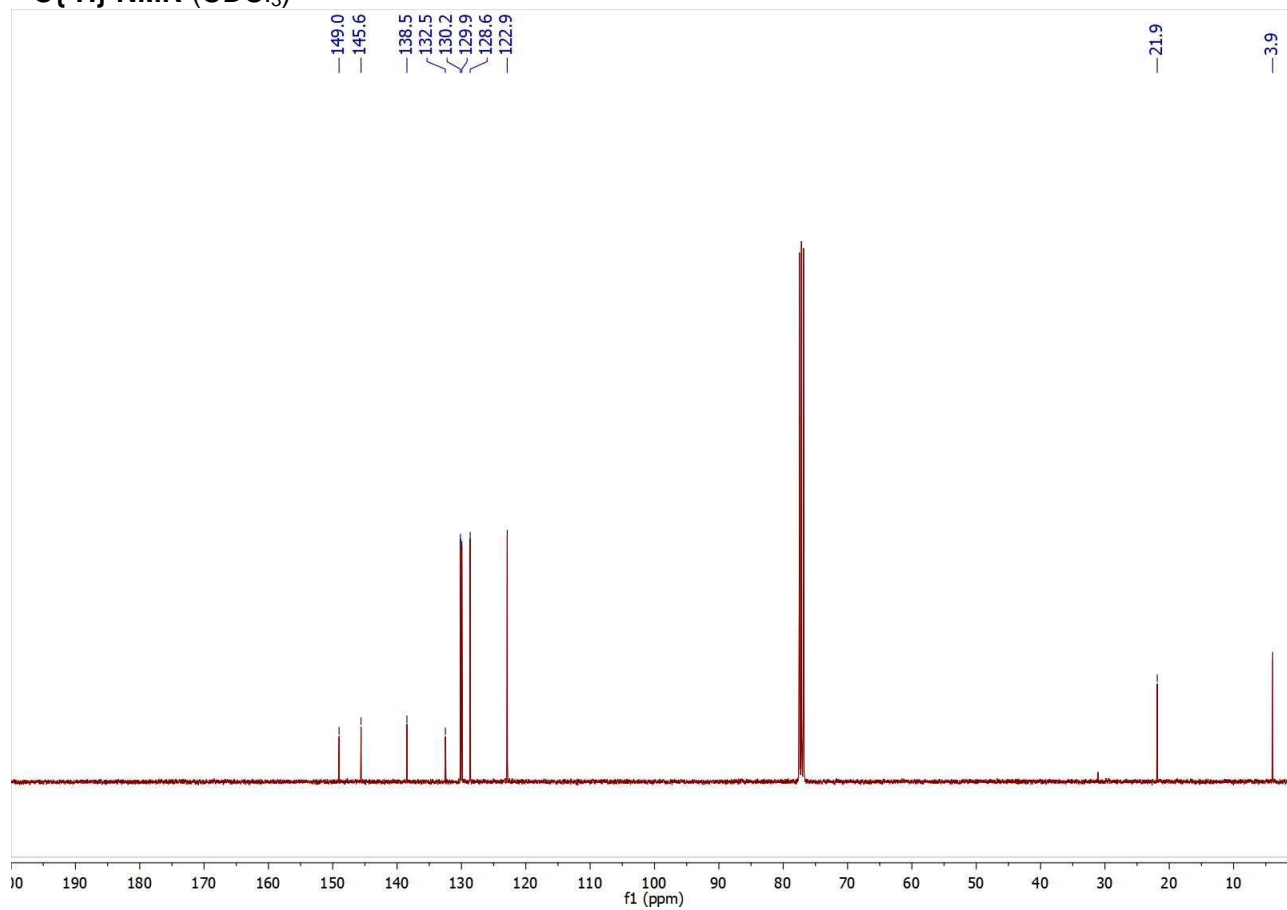

***N*-Benzylidene-4-methylphenylsulfonamide (4)**

<sup>1</sup>H NMR (CDCl<sub>3</sub>)

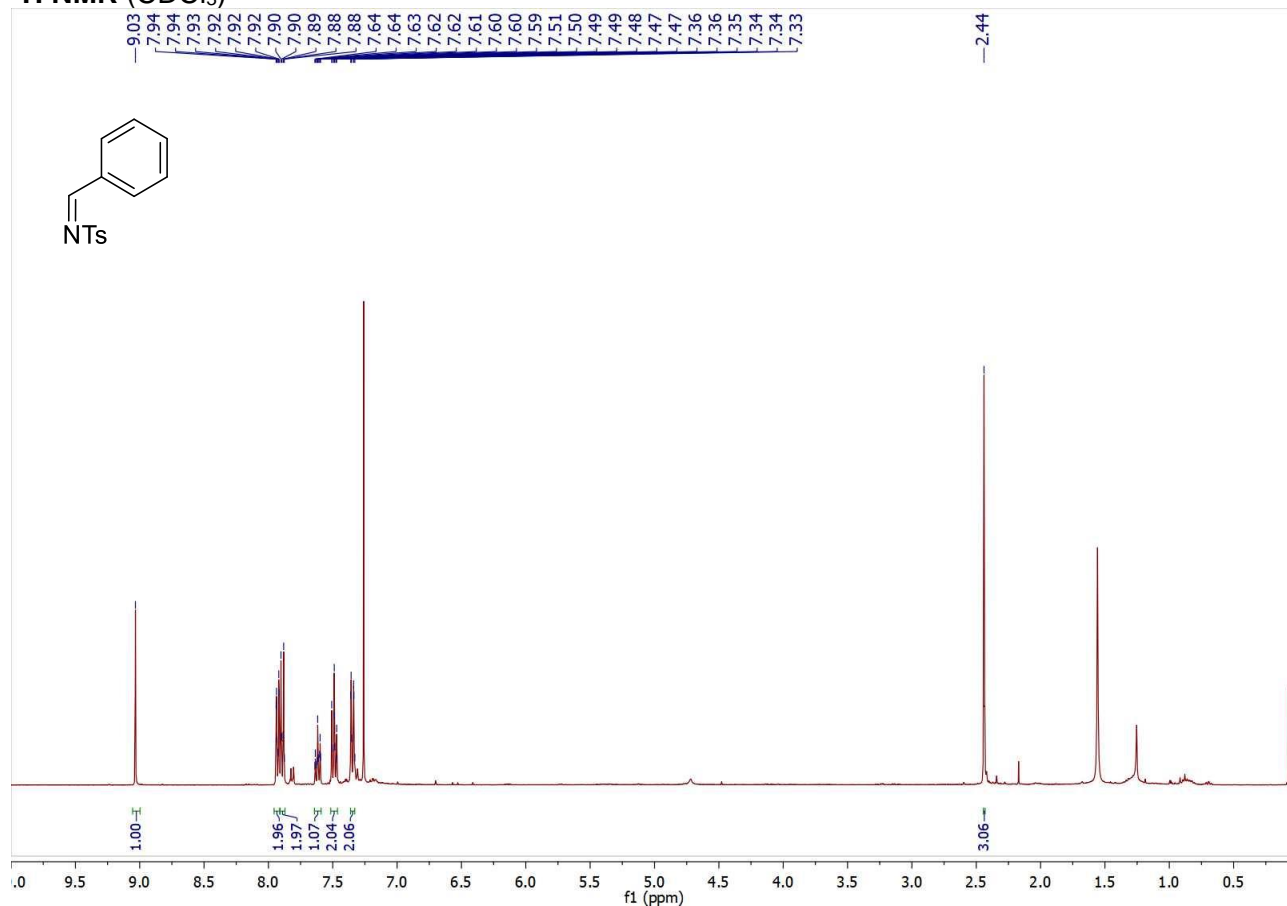

<sup>13</sup>C{<sup>1</sup>H} NMR (CDCl<sub>3</sub>)

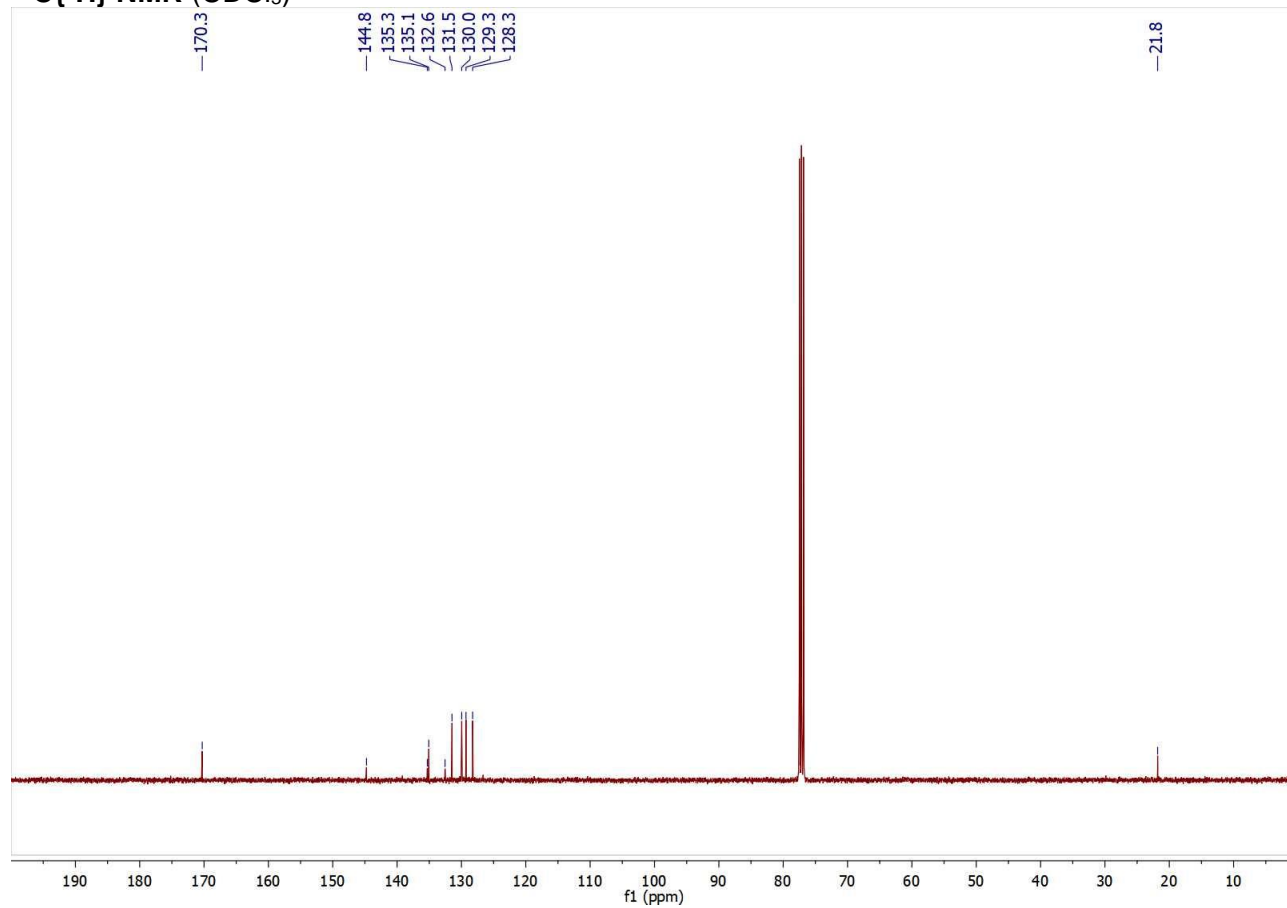

## 8. X-ray diffraction data of 2aa

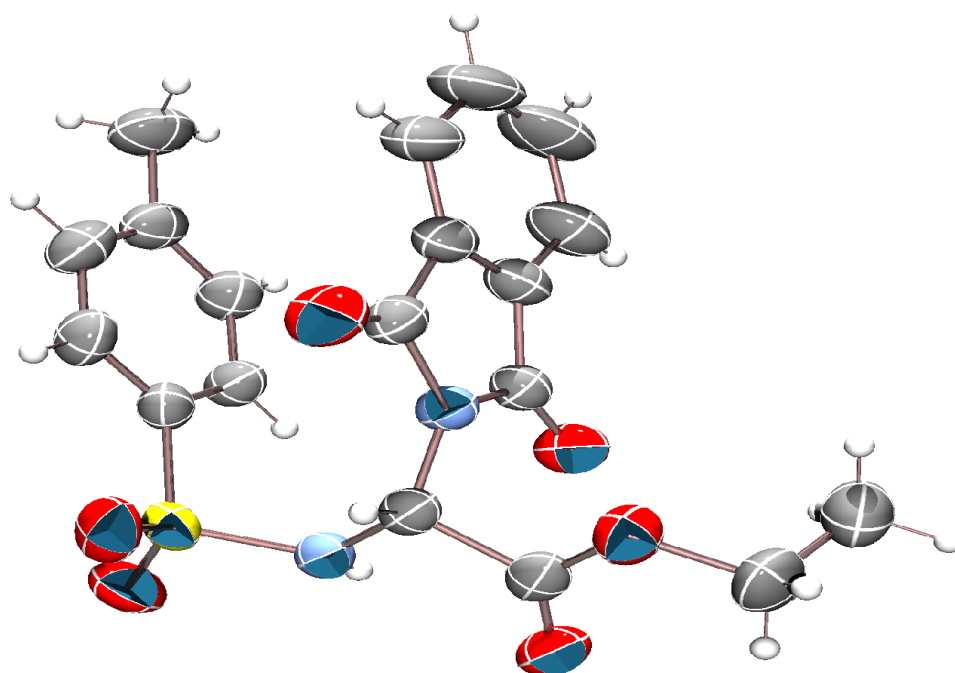

Thermal ellipsoids are drawn at the 50% probability level.

**Table S4.** Crystal data and structure refinement for **2aa**.

|                                           |                                                                 |                                       |                                     |
|-------------------------------------------|-----------------------------------------------------------------|---------------------------------------|-------------------------------------|
| CCDC number                               | 2431275                                                         | Crystal colour                        | colourless                          |
| Empirical formula                         | C <sub>19</sub> H <sub>18</sub> N <sub>2</sub> O <sub>6</sub> S | Crystal shape                         | prism                               |
| Formula weight                            | 402.41                                                          | Radiation                             | CuK $\alpha$ ( $\lambda$ = 1.54178) |
| Temperature [K]                           | 300.0                                                           | 2 $\theta$ range [°]                  | 12.824 to 144.858                   |
| Crystal system                            | triclinic                                                       | Index ranges                          | -10 $\leq$ h $\leq$ 9               |
| Space group (number)                      | P-1                                                             |                                       | -13 $\leq$ k $\leq$ 13              |
| <i>a</i> [Å]                              | 8.2636(3)                                                       |                                       | -15 $\leq$ l $\leq$ 15              |
| <i>b</i> [Å]                              | 10.5834(4)                                                      | Reflections collected                 | 25306                               |
| <i>c</i> [Å]                              | 12.5316(4)                                                      | Independent reflections               | 3656                                |
| $\alpha$ [°]                              | 72.0730(10)                                                     |                                       | $R_{\text{int}}$ = 0.0549           |
| $\beta$ [°]                               | 74.0080(10)                                                     | Data / Restraints / Parameters        | $R_{\text{sigma}}$ = 0.0322         |
| $\gamma$ [°]                              | 67.2850(10)                                                     |                                       | 3656/0/259                          |
| Volume [Å <sup>3</sup> ]                  | 946.44(6)                                                       | Goodness-of-fit on $F^2$              | 1.061                               |
| <i>Z</i>                                  | 2                                                               | Final <i>R</i> indexes                | $R_1$ = 0.0458                      |
| $\rho_{\text{calc}}$ [gcm <sup>-3</sup> ] | 1.412                                                           | [ $I \geq 2\sigma(I)$ ]               | $wR_2$ = 0.1184                     |
| $\mu$ [mm <sup>-1</sup> ]                 | 1.872                                                           | Final <i>R</i> indexes                | $R_1$ = 0.0533                      |
| <i>F</i> (000)                            | 420.0                                                           | [all data]                            | $wR_2$ = 0.1286                     |
| Crystal size [mm <sup>3</sup> ]           | 0.15 $\times$ 0.1 $\times$ 0.04                                 | Largest peak/hole [eÅ <sup>-3</sup> ] | 0.36/-0.37                          |

Single crystals of **2aa** were obtained from CH<sub>2</sub>Cl<sub>2</sub>/hexane mixture by slow evaporation. A colorless prism-like specimen, approximate dimensions 0.040 mm x 0.100 mm x 0.150 mm, was used for the X-ray crystallographic analysis. The X-ray intensity data were measured ( $\lambda = 1.54184 \text{ \AA}$ ). A total of 1908 frames were collected. The total exposure time was 5.30 hours. The frames were integrated with the Bruker SAINT software package using a narrow-frame algorithm.<sup>44</sup> The integration of the data using a triclinic unit cell yielded a total of 26325 reflections to a maximum  $\theta$  angle of  $72.38^\circ$  ( $0.81 \text{ \AA}$  resolution). The final cell constants of  $a = 8.2636(3) \text{ \AA}$ ,  $b = 10.5834(4) \text{ \AA}$ ,  $c = 12.5316(4) \text{ \AA}$ ,  $\alpha = 72.0734(12)^\circ$ ,  $\beta = 74.0080(11)^\circ$ ,  $\gamma = 67.2846(11)^\circ$ , volume =  $946.44(6) \text{ \AA}^3$ , are based upon the refinement of the XYZ-centroids of 9917 reflections above  $20 \sigma(I)$  with  $12.82^\circ < 2\theta < 144.3^\circ$ . Data were corrected for absorption effects using the Multi-Scan method (SADABS).<sup>45</sup> The ratio of minimum to maximum apparent transmission was 0.699. Absorption corrections were applied, based on multiple and symmetry-equivalent measurements. The structure was solved by ShelXT structure solution program using Intrinsic Phasing and refined with the XL refinement package using Least Squares minimisation.<sup>46</sup> All non-hydrogen atoms were assigned anisotropic displacement parameters and refined without positional constraints and all other hydrogen atoms were constrained to ideal geometries and refined with fixed isotropic displacement parameters. Crystallographic data for the structures reported in this paper have been deposited with the Cambridge Crystallographic Data Centre.<sup>47</sup> CCDC 2431275 contain the supplementary crystallographic data. These data can be obtained free of charge from The Cambridge Crystallographic Data Centre via [www.ccdc.cam.ac.uk/structures](http://www.ccdc.cam.ac.uk/structures).

---

<sup>44</sup> a) SAINT integration software, SAINT V8.38A (Bruker AXS Inc., 2017); b) G.M. Sheldrick, *Acta Cryst.* 2015, **A71**, 3; APEX3 Version 2016.7 (Bruker AXS Inc.) Bruker Instrument Service vV6.2.10.

<sup>45</sup> SADABS-2016/2 - Bruker AXS area detector scaling and absorption correction (Sheldrick, Bruker AXS Inc.).

<sup>46</sup> *SHELXTL program system version 6.1*; XPREP Version 2013/3 (Sheldrick, Bruker AXS Inc.) XS Version 2013/1 (G. M. Sheldrick, *Acta Cryst.* 2008, **A64**, 112).

<sup>47</sup> C. R. Groom, I. J. Bruno, M. P. Lightfoot, S. C. Ward, *Acta Cryst.* 2016, **B72**, 171.
